# Supplementary material for: Human-specific lncRNAs contributed critically to human evolution by distinctly regulating gene expression
Source: eLife. 2026 Mar 13;12:RP89001. doi: 10.7554/eLife.89001 (PMC12987650; doi:10.7554/eLife.89001)
Supplement: Supplementary file 1. [file elife-89001-supp1.xlsx]

## Sheet: ReadMe
Supplementary Table A - Human-specific lncRNA genes.
Supplementary Table B - DBSs with strong binding affinity.
Supplementary Table C - DBSs with weak binding affinity.
Supplementary Table D - Enriched GO terms of genes with strong and weak DBSs.
Supplementary Table E - Target genes with DBSs that have top binding affinity.
Supplementary Table F - Genes with sorted DBS distances, and ASE genes in human-chimpanzee hybrid cells (Agoglia et al. 2021 Table S4).
Supplementary Table G - Enriched GO terms for top/bottom 25% of target genes (see Table F).
Supplementary Table H - Enriched GO terms for top/bottom 50% of target genes (see Table F), intersected with ASE genes in Agoglia et al. 2021 Table S4.
Supplementary Table I - Weighted Fst and Tajima's D of genes with top DBS distances.
Supplementary Table J - Tajima'D of DBSs in CEU,CHB,YRI.
Supplementary Table K - Tajima'D of DBSs in CEU+CHB.
Supplementary Table L - Fay-Wu's H of DBSs in CEU,CHB,YRI.
Supplementary Table M - SNPs with cis-effect in GTEx tissues.
Supplementary Table N - SNPs that are xQTL.
Supplementary Table O - DBSs in genes involved in brain development.
Supplementary Table P - Predicted DBSs of HS TFs and their distance from modern humans to archaic humans and chimpanzees.
Supplementary Table Q - Modules, genes, and enriched pathways in frontal cortex and anterior cingulate cortex in the human and macaque brain.
Supplementary Table R - Predicted and experimentally detected DBSs in target genes of MALAT1, NEAT1, and MEG3.

## Sheet: Table A
LncRNA	Chr	Start	End	Strand	Transposons	Target Genes	Target Transcripts
5S_rRNA	chr16	34977639	34990886	+	LTR	646	2589
AC006129.1	chr19	42037566	42038534	+		9	18
AC006129.2	chr19	42051554	42061832	+	LTR, SINE	1367	4881
AC006129.4	chr19	42041545	42043266	+	LTR, LINE (#)	133	367
AC006262.4	chr19	46667150	46683904	-	LTR, SINE, LINE	125	320
AC007359.6	chrY	24246961	24293631	-	SINE, LTR	2	3
AC008175.1	chrY	24585087	24631739	+	SINE, LTR	52	120
AC010525.7	chr19	56207681	56208795	+		36	121
AC010891.2	chrY	9650924	9655122	+	SINE, LTR	107	278
AC024592.9	chr19	5847478	5858250	+	SINE, LINE, LTR	125	342
AC129929.5 (CD81-AS1)	chr11	2349979	2399222	-	SINE, LINE, LTR	381	983
CTB-151G24.1	chr19	28129391	28137391	-	SINE, LTR	6	13
CTD-2008P7.9	chr17	26559616	26562307	-	LTR (*)	24	70
CTD-2142D14.1	chr14	38660188	38672128	+	LTR	0	0
CTD-2291D10.1	chr19	23229760	23244554	-	SINE	0	0
CTD-2534I21.9	chr17	43059882	43060140	+		8	27
CTD-3051D23.4	chr14	105324129	105325173	-	SINE, LINE	2	5
FAM197Y7	chrY	9205412	9235047	-	SINE, LINE, LTR	424	1276
LA16c-306A4.2	chr16	950520	955224	-	SINE	9195	32722
LINC00279	chrY	8506335	8512883	+		196	488
LINC00280	chrY	6225260	6229454	-	SINE, LTR	111	286
RP11-157B13.7	chr19	22426056	22428149	-	SINE (#)	25	65
RP11-159F24.6	chr5	43511160	43521913	+	SINE, LINE, LTR	138	398
RP1-118J21.25	chr1	40254648	40255843	+	SINE, LINE	1987	7015
RP11-229P13.25	chr9	139831621	139832440	-	SINE, LINE	18	51
RP11-277P12.10	chr12	10485460	10490891	-	LTR (*)	42	72
RP11-304M2.3	chr11	129279	186136	+	SINE, LINE, LTR	11	22
RP11-326C3.13	chr11	325703	326294	-	LTR	11	17
RP11-344P13.4	chr1	121236177	121252295	-	SINE, LINE, LTR	14	47
RP11-398H6.1	chr8	140472305	140475259	-	LTR (#*)	42	65
RP11-423H2.3	chr5	177377336	177390961	+	SINE, LINE, LTR	17941	73855
RP11-426L16.8	chr1	113362792	113393265	-	SINE, LINE, LTR	2576	9720
RP11-598D14.1	chr4	176379440	176387848	-	SINE, LINE, LTR (#)	28	51
RP11-65G9.1	chrY	23200175	23206610	-	LTR (#*)	6038	23184
RP11-706O15.5	chrX	3809479	3838787	-	SINE, LINE, LTR	1118	2816
RP11-708H21.4	chr17	47249257	47250608	+	LTR (*)	135	286
RP11-848P1.4	chr17	29305628	29307268	-	Other (#*)	67	275
RP11-98L5.2	chr9	138466781	138478958	+	SINE, LINE, LTR	524	1550
RP13-516M14.1	chr17	80251592	80252786	+	SINE, LINE	673	1863
RP13-539J13.1	chr2	739588	740164	-	LTR	409	971
RP4-669L17.10	chr1	317720	453948	+	SINE, LINE, LTR	135	385
RP4-740C4.7	chr1	2294500	2295067	-	SINE, LINE	262	723
SNORA59B	chr17	19460524	19461224	+	SINE, LINE	9588	37754
SNORD3A	chr17	19091329	19092027	+	SINE (#)	2725	10312
SNORD3B-1	chr17	18965225	18965807	+	SINE	3929	14967
SNORD3B-2	chr17	18966762	18967449	-	SINE	2918	11016
SNORD3C	chr17	19092978	19093558	-	SINE	3827	14628
SNORD3D	chr17	19015313	19015949	-	SINE	3568	13621
TTTY1	chrY	9590765	9611898	-	SINE	11	32
TTTY18	chrY	8551411	8551919	-		8	24
TTTY19	chrY	8572513	8573324	+		327	790
TTTY1B	chrY	6258472	6279605	+	SINE	11	32
TTTY2	chrY	9578193	9596085	+	SINE	13666	51345
TTTY21	chrY	9555262	9558905	-		16	22
TTTY21B	chrY	6311475	6315118	+		16	22
TTTY23B	chrY	6110487	6111651	-		308	923
TTTY2B	chrY	6274285	6292186	-	SINE	13666	51345
TTTY5	chrY	24442945	24445023	-		158	377
TTTY6	chrY	24585740	24587605	-		6	25
TTTY6B	chrY	24291113	24292978	+		6	25
TTTY7	chrY	6317509	6325947	+		35	90
TTTY7B	chrY	9544433	9552871	-		35	90
TTTY8	chrY	9528709	9531566	+		14427	54657
TTTY8B	chrY	6338814	6341671	-		14427	54657
WASIR2	chr16	72910	75123	+		44	130
Z97634.5	chr16	432097	442960	+		260	807

## Sheet: Table B
LncRNA	Target gene (Ensembl release 79)	Gene symbol (Ensembl release115)	Target transcripts	Chr	DBS-start	DBS-end	Binding affinity	Human-Chimp distance	Human-Altai distance	Human-Denisovan distance	Human Vindija distance	SNP number	Annotated SNP	CEU-YRI-WeightedFst	CHB-YRI-WeightedFst	Integrated-WeightedFst	CEU-TajimaD	CHB-TajimaD	YRI-TajimaD
5S_rRNA	ACBD6	ACBD6	ACBD6-001	1	180471685	180471812	85.22	0	0	0	0						#-nan	#-nan	#-nan
5S_rRNA	ALDH9A1	ALDH9A1	ALDH9A1-001,ALDH9A1-004,ALDH9A1-005,ALDH9A1-201	1	165667822	165667916	62.31	0	0	0.011	0						#-nan	#-nan	#-nan
5S_rRNA	ASPM	ASPM	ASPM-001,ASPM-201,ASPM-202(*)	1	197115405	197115529	81.97	0	0	0	0						#-nan	#-nan	#-nan
5S_rRNA	ASTN1	ASTN1	ASTN1-001,ASTN1-002,ASTN1-003,ASTN1-006,ASTN1-201	1	177133415	177133509	62.31	0	0	0	0						#-nan	#-nan	#-nan
5S_rRNA	ATP1A4	ATP1A4	ATP1A4-001,ATP1A4-004	1	160121518	160121627	74.52	0.03	0	0.018	0	1	rs74123262	0.03	0.04	0.04	#-nan	#-nan	-0.57
5S_rRNA	ATP1B1	ATP1B1	ATP1B1-001,ATP1B1-002,ATP1B1-003,ATP1B1-202	1	169075227	169075371	98.33	0.022	0.011	0.035	0.011	3	rs181926860,rs191910483,rs12751593	0.01	0.01	0.01	-0.29	0.65	0.02
5S_rRNA	ATP1B1	ATP1B1	ATP1B1-001,ATP1B1-002,ATP1B1-003,ATP1B1-202	1	169076180	169076278	63.57	0.022	0.011	0.035	0.011	2	rs1200128,rs61204485	0.31	0.17	0.3	0.54	-0.9	0.68
5S_rRNA	C1orf105,PIGC	C1orf105,PIGC	C1orf105-005,PIGC-001,PIGC-002,PIGC-004,PIGC-008,PIGC-201	1	172412934	172413037	69.36	0.021	0	0.01	0	1	rs3213563	0.56	0.61	0.43	1.77	1.6	-0.64
5S_rRNA	C1orf105,PIGC	C1orf105,PIGC	C1orf105-005,PIGC-001,PIGC-002,PIGC-004,PIGC-008,PIGC-201	1	172412935	172413040	70.99	0.021	0	0.01	0	1	rs3213563	0.56	0.61	0.43	1.77	1.6	-0.64
5S_rRNA	C1orf106	INAVA	C1orf106-001,C1orf106-004,C1orf106-005	1	200860192	200860282	61.69	0.036	0.011	0.023	0.011	1	rs3753957	0	0	0	-0.13	0.39	0.24
5S_rRNA	C1orf21,RP11-382D12.2	C1orf21,C1orf21-DT	C1orf21-001,RP11-382D12.2-001	1	184356023	184356134	75.89	0	0	0.009	0	1	.	0	#-nan	0	-0.97	#-nan	#-nan
5S_rRNA	C1orf21,RP11-382D12.2	C1orf21,C1orf21-DT	C1orf21-001,RP11-382D12.2-001	1	184356027	184356136	73.44	0	0	0.009	0	1	.	0	#-nan	0	-0.97	#-nan	#-nan
5S_rRNA	C1orf27,TPR	ODR4,TPR	C1orf27-001,C1orf27-004,C1orf27-201,TPR-001,TPR-002,TPR-003,TPR-201(*)	1	186344186	186344309	82.8	0.008	0	0.008	0	1	rs184235137	0.01	0.01	0.01	#-nan	#-nan	-0.9
5S_rRNA	C1orf27	ODR4	C1orf27-002	1	186387406	186387544	90.68	10	0.015	0	0						#-nan	#-nan	#-nan
5S_rRNA	C1orf53	C1orf53	C1orf53-001,C1orf53-002,C1orf53-003	1	197871702	197871799	65.12	0.013	0.013	0.013	0	1	rs187866458	0	0	0	#-nan	#-nan	-0.54
5S_rRNA	CACNA1E	CACNA1E	CACNA1E-001,CACNA1E-002,CACNA1E-003,CACNA1E-005,CACNA1E-006,CACNA1E-201,CACNA1E-202,CACNA1E-203,CACNA1E-204(*)	1	181451958	181452055	66.1	0.01	0	0	0						#-nan	#-nan	#-nan
5S_rRNA	CADM3	CADM3	CADM3-001,CADM3-002,CADM3-004	1	159141529	159141677	102.26	0	0	0.007	0						#-nan	#-nan	#-nan
5S_rRNA	CAMSAP2	CAMSAP2	CAMSAP2-001,CAMSAP2-002,CAMSAP2-004	1	200708665	200708825	106.53	0	0	0.006	0.006						#-nan	#-nan	#-nan
5S_rRNA	CDC73	CDC73	CDC73-001,CDC73-002	1	193091069	193091168	67.9	0	0	0	0						#-nan	#-nan	#-nan
5S_rRNA	CEP350,RP11-533E19.5	CEP350,RP11-533E19.5	CEP350-001,CEP350-012,RP11-533E19.5-001	1	179924148	179924267	80.78	0.009	0	0	0						#-nan	#-nan	#-nan
5S_rRNA	CEP350,RP11-533E19.5	CEP350,RP11-533E19.5	CEP350-001,CEP350-012,RP11-533E19.5-001	1	179924146	179924261	77.52	0.009	0	0	0						#-nan	#-nan	#-nan
5S_rRNA	CEP350	CEP350	CEP350-005	1	180059579	180059680	67.54	0.032	0	0	0						#-nan	#-nan	#-nan
5S_rRNA	CFHR5	CFHR5	CFHR5-001,CFHR5-201	1	196945962	196946067	69.7	0.02	0	0.02	0	2	rs146690273,rs182987096	0.15	0.08	0.07	-0.8	0.96	0.92
5S_rRNA	COLGALT2	COLGALT2	COLGALT2-001,COLGALT2-201	1	184006498	184006642	99.77	0.007	0	0.015	0	2	rs114661926,rs200837212	0.08	0.21	0.12	1.61	1.96	-0.04
5S_rRNA	CRB1	CRB1	CRB1-001,CRB1-004,CRB1-005,CRB1-006,CRB1-202,CRB1-201(*)	1	197234446	197234538	64.26	0.011	0.021	0.021	0	2	rs187368546,rs183662592	0.01	0.01	0.01	#-nan	#-nan	-1.17
5S_rRNA	CREG1	CREG1	CREG1-001	1	167522751	167523007	174.22	0.004	0	0.004	0	1	rs12410167	0.13	0.04	0.07	0.32	-0.48	#-nan
5S_rRNA	CSRP1,RP11-134G8.7	CSRP1,CSRP1-AS1	CSRP1-002,CSRP1-003,CSRP1-005,CSRP1-006,CSRP1-010,CSRP1-011,CSRP1-012,CSRP1-013,CSRP1-014,CSRP1-015,CSRP1-016,CSRP1-017,CSRP1-201,RP11-134G8.7-001	1	201476116	201476215	64.94	0	0	0	0						#-nan	#-nan	#-nan
5S_rRNA	DCAF6,MPC2	DCAF6,MPC2	DCAF6-001,DCAF6-002,DCAF6-003,DCAF6-007,DCAF6-008,DCAF6-009,DCAF6-011,DCAF6-201,MPC2-001,MPC2-002,MPC2-003	1	167906239	167906347	71.96	0.014	0.01	0.043	0.01						#-nan	#-nan	#-nan
5S_rRNA	DCAF6,MPC2	DCAF6,MPC2	DCAF6-001,DCAF6-002,DCAF6-003,DCAF6-007,DCAF6-008,DCAF6-009,DCAF6-011,DCAF6-201,MPC2-001,MPC2-002,MPC2-003	1	167906241	167906347	72.22	0.014	0.01	0.043	0.01						#-nan	#-nan	#-nan
5S_rRNA	DEDD	DEDD	DEDD-001,DEDD-002,DEDD-003,DEDD-004,DEDD-005,DEDD-006,DEDD-007,DEDD-008,DEDD-009,DEDD-010,DEDD-201,DEDD-202,DEDD-203	1	161102317	161102468	102	0.022	0	0.01	0						#-nan	#-nan	#-nan
5S_rRNA	DEDD	DEDD	DEDD-001,DEDD-002,DEDD-003,DEDD-004,DEDD-005,DEDD-006,DEDD-007,DEDD-008,DEDD-009,DEDD-010,DEDD-201,DEDD-202,DEDD-203	1	161102384	161102484	68.14	0.022	0	0.01	0						#-nan	#-nan	#-nan
5S_rRNA	DENND1B	DENND1B	DENND1B-003,DENND1B-004,DENND1B-005,DENND1B-008,DENND1B-009,DENND1B-010,DENND1B-011	1	197743946	197744088	95.27	0.015	0	0	0						#-nan	#-nan	#-nan
5S_rRNA	DENND1B	DENND1B	DENND1B-003,DENND1B-004,DENND1B-005,DENND1B-008,DENND1B-009,DENND1B-010,DENND1B-011,DENND1B-201(*)	1	197744358	197744500	95.88	0.015	0	0	0						#-nan	#-nan	#-nan
5S_rRNA	DHX9	DHX9	DHX9-001,DHX9-007	1	182808399	182808502	67.32	0	0	0	0						#-nan	#-nan	#-nan
5S_rRNA	DUSP12	DUSP12	DUSP12-001,DUSP12-002,DUSP12-003,DUSP12-004	1	161716291	161716404	75.58	0.193	0.009	0.077	0	5	.,.,.,rs72706012,.	0.12	0.05	0.06	-0.55	0.85	1.16
5S_rRNA	DUSP23	DUSP23	DUSP23-001,DUSP23-002,DUSP23-003	1	159750744	159750856	74.37	0.009	0	0.009	0	1	rs3806189	0.06	0.02	0.03	0.8	0.34	-0.32
5S_rRNA	EDEM3	EDEM3	EDEM3-001,EDEM3-004,EDEM3-201	1	184723709	184723855	96.23	0.007	0.021	0.021	0	2	rs3795407,rs193034365	0	0.03	0.02	-1.26	-0.85	#-nan
5S_rRNA	FAM163A	FAM163A	FAM163A-001	1	179712379	179712475	66.78	0	0.021	0.021	0	2	rs60556788,rs114023504	0.01	0.29	0.2	0.36	1.74	0.63
5S_rRNA	FAM20B	FAM20B	FAM20B-001,FAM20B-002	1	178995089	178995453	250.47	0.034	0	0.003	0	1	rs193196190	0.03	0	0.03	-0.37	-0.96	-0.9
5S_rRNA	FAM78B,RP11-9L18.3	FAM78B,RP11-9L18.3	FAM78B-001,FAM78B-002,FAM78B-003,FAM78B-004,FAM78B-201,RP11-9L18.3-001	1	166135775	166135917	98.12	0.008	0	0	0						#-nan	#-nan	#-nan
5S_rRNA	FAM78B,RP11-9L18.3	FAM78B,RP11-9L18.3	FAM78B-001,FAM78B-002,FAM78B-003,FAM78B-004,FAM78B-201,RP11-9L18.3-001	1	166135772	166135906	92.32	0.008	0	0	0						#-nan	#-nan	#-nan
5S_rRNA	FCGR2B	FCGR2B	FCGR2B-201,FCGR2B-202,FCGR2B-203,FCGR2B-204	1	161549036	161549137	67.54	10	0	0.01	0						#-nan	#-nan	#-nan
5S_rRNA	FCRLB	FCRLB	FCRLB-002	1	161696895	161696989	63.24	0.023	0	0.011	0	1	rs6658140	0.42	0.09	0.23	0.8	1.96	1.45
5S_rRNA	GAS5,SNORD78,ZBTB37	GAS5,SNORD78,ZBTB37	GAS5-001,GAS5-002,GAS5-003,GAS5-004,GAS5-005,GAS5-006,GAS5-007,GAS5-008,GAS5-009,GAS5-010,GAS5-011,GAS5-012,GAS5-013,GAS5-014,GAS5-015,GAS5-016,GAS5-017,GAS5-018,GAS5-019,GAS5-020,GAS5-021,GAS5-022,GAS5-027,GAS5-028,GAS5-029,GAS5-201,GAS5-203,GAS5-204,GAS5-207,SNORD78-201,ZBTB37-001,ZBTB37-002,ZBTB37-003,ZBTB37-201,ZBTB37-202	1	173837699	173837819	80	0.005	0	0.017	0	2	rs9726181,rs115377635	0.05	0.06	0.06	#-nan	#-nan	-0.52
5S_rRNA	GAS5,SNORD78,ZBTB37	GAS5,SNORD78,ZBTB37	GAS5-001,GAS5-002,GAS5-003,GAS5-004,GAS5-005,GAS5-006,GAS5-007,GAS5-008,GAS5-009,GAS5-010,GAS5-011,GAS5-012,GAS5-013,GAS5-014,GAS5-015,GAS5-016,GAS5-017,GAS5-018,GAS5-019,GAS5-020,GAS5-021,GAS5-022,GAS5-027,GAS5-028,GAS5-029,GAS5-201,GAS5-203,GAS5-204,GAS5-207,SNORD78-201,ZBTB37-001,ZBTB37-002,ZBTB37-003,ZBTB37-201,ZBTB37-202	1	173837629	173837851	149.14	0.005	0	0.017	0	2	rs9726181,rs115377635	0.05	0.06	0.06	#-nan	#-nan	-0.52
5S_rRNA	GAS5,SNORD78,ZBTB37	GAS5,SNORD78,ZBTB37	GAS5-001,GAS5-002,GAS5-003,GAS5-004,GAS5-005,GAS5-006,GAS5-007,GAS5-008,GAS5-009,GAS5-010,GAS5-011,GAS5-012,GAS5-013,GAS5-014,GAS5-015,GAS5-016,GAS5-017,GAS5-018,GAS5-019,GAS5-020,GAS5-021,GAS5-022,GAS5-027,GAS5-028,GAS5-029,GAS5-201,GAS5-203,GAS5-204,GAS5-207,SNORD78-201,ZBTB37-001,ZBTB37-002,ZBTB37-003,ZBTB37-201,ZBTB37-202	1	173837620	173837788	110.48	0.005	0	0.017	0	2	rs9726181,rs115377635	0.05	0.06	0.06	#-nan	#-nan	-0.52
5S_rRNA	GAS5,SNORD78,ZBTB37	GAS5,SNORD78,ZBTB37	GAS5-001,GAS5-002,GAS5-003,GAS5-004,GAS5-005,GAS5-006,GAS5-007,GAS5-008,GAS5-009,GAS5-010,GAS5-011,GAS5-012,GAS5-013,GAS5-014,GAS5-015,GAS5-016,GAS5-017,GAS5-018,GAS5-019,GAS5-020,GAS5-021,GAS5-022,GAS5-027,GAS5-028,GAS5-029,GAS5-201,GAS5-203,GAS5-204,GAS5-207,SNORD78-201,ZBTB37-001,ZBTB37-002,ZBTB37-003,ZBTB37-201,ZBTB37-202	1	173837646	173837794	97.81	0.005	0	0.017	0	2	rs9726181,rs115377635	0.05	0.06	0.06	#-nan	#-nan	-0.52
5S_rRNA	GAS5,SNORD78,ZBTB37	GAS5,SNORD78,ZBTB37	GAS5-001,GAS5-002,GAS5-003,GAS5-004,GAS5-005,GAS5-006,GAS5-007,GAS5-008,GAS5-009,GAS5-010,GAS5-011,GAS5-012,GAS5-013,GAS5-014,GAS5-015,GAS5-016,GAS5-017,GAS5-018,GAS5-019,GAS5-020,GAS5-021,GAS5-022,GAS5-027,GAS5-028,GAS5-029,GAS5-201,GAS5-203,GAS5-204,GAS5-207,SNORD78-201,ZBTB37-001,ZBTB37-002,ZBTB37-003,ZBTB37-201,ZBTB37-202	1	173837623	173837800	116.42	0.005	0	0.017	0	2	rs9726181,rs115377635	0.05	0.06	0.06	#-nan	#-nan	-0.52
5S_rRNA	GLRX2	GLRX2	GLRX2-001,GLRX2-002,GLRX2-003	1	193074546	193074658	74.05	0.029	0.021	0.021	0	1	rs10921310	0	0.22	0.15	1.45	1.79	1.3
5S_rRNA	GLUL	GLUL	GLUL-001,GLUL-002,GLUL-003,GLUL-004,GLUL-005,GLUL-006,GLUL-007,GLUL-008,GLUL-009,GLUL-201,GLUL-202	1	182360894	182361040	100.6	0.014	0.007	0.022	0.007	2	rs912902,rs112448103	0.16	0.15	0.11	0.66	0.65	0.49
5S_rRNA	GLUL	GLUL	GLUL-001,GLUL-002,GLUL-003,GLUL-004,GLUL-005,GLUL-006,GLUL-007,GLUL-008,GLUL-009,GLUL-201,GLUL-202,GLUL-203(*)	1	182360939	182361051	77.42	0.014	0.007	0.022	0.007						#-nan	#-nan	#-nan
5S_rRNA	GPR161	GPR161	GPR161-002,GPR161-003,GPR161-004,GPR161-005,GPR161-202,GPR161-203,GPR161-204,GPR161-205,GPR161-201(*)	1	168105950	168106060	74.66	0	0	0	0						#-nan	#-nan	#-nan
5S_rRNA	GS1-120K12.4	LINC01633	GS1-120K12.4-001	1	184967823	184967929	71.15	0.059	0.044	0	0						#-nan	#-nan	#-nan
5S_rRNA	GS1-279B7.2,IVNS1ABP	GS1-279B7.2,IVNS1ABP	GS1-279B7.2-001,IVNS1ABP-001,IVNS1ABP-002	1	185286293	185286420	86.5	0.025	0	0.011	0	1	rs111942298	0.01	0.01	0.01	#-nan	#-nan	-0.9
5S_rRNA	GS1-279B7.2,IVNS1ABP	GS1-279B7.2,IVNS1ABP	GS1-279B7.2-001,IVNS1ABP-001,IVNS1ABP-002	1	185286316	185286410	64.06	0.025	0	0.011	0	1	rs111942298	0.01	0.01	0.01	#-nan	#-nan	-0.9
5S_rRNA	IER5,RP11-309G3.3	IER5,RP11-309G3.3	IER5-001,RP11-309G3.3-001	1	181058621	181058717	66.65	0.023	0.011	0.011	0	1	rs1361365	0.11	0.12	0.11	#-nan	#-nan	0.19
5S_rRNA	ILDR2,MAEL	ILDR2,MAEL	ILDR2-001,ILDR2-002,ILDR2-003,ILDR2-004,ILDR2-005,ILDR2-006,ILDR2-007,MAEL-202(*)	1	166944625	166944805	124.61	0.018	0.006	0.006	0.006	1	rs112416021	0.22	0.4	0.26	0.93	0	1.91
5S_rRNA	ILDR2	ILDR2	ILDR2-008(*)	1	166889971	166890073	70.79	0	0	0	0						#-nan	#-nan	#-nan
5S_rRNA	IPO9,IPO9-AS1	IPO9,IPO9-AS1	IPO9-001,IPO9-004,IPO9-AS1-001,IPO9-AS1-002,IPO9-AS1-003	1	201798227	201798347	81.6	0	0	0	0						#-nan	#-nan	#-nan
5S_rRNA	KIAA1614	KIAA1614	KIAA1614-001,KIAA1614-003	1	180882114	180882257	97.1	0.023	0	0	0						#-nan	#-nan	#-nan
5S_rRNA	KIF21B,RP11-168O16.1	KIF21B,RP11-168O16.1	KIF21B-002,KIF21B-003,KIF21B-005,KIF21B-006,RP11-168O16.1-001,RP11-168O16.1-002	1	200992653	200992758	73.92	0.017	0.021	0.021	0	2	rs185073142,rs192321957	0.03	0	0.02	#-nan	-0.31	-0.81
5S_rRNA	KIF21B,RP11-168O16.1	KIF21B,RP11-168O16.1	KIF21B-002,KIF21B-003,KIF21B-005,KIF21B-006,RP11-168O16.1-001,RP11-168O16.1-002	1	200992660	200992790	89.01	0.017	0.021	0.021	0	2	rs185073142,rs192321957	0.03	0	0.02	#-nan	-0.31	-0.81
5S_rRNA	KLHDC9	KLHDC9	KLHDC9-001,KLHDC9-003,KLHDC9-004,KLHDC9-005,KLHDC9-006,KLHDC9-007,KLHDC9-008,KLHDC9-009	1	161068544	161068697	106.68	0	0	0.013	0						#-nan	#-nan	#-nan
5S_rRNA	LAMC1	LAMC1	LAMC1-001	1	182992543	182992686	95.68	0	0	0	0						#-nan	#-nan	#-nan
5S_rRNA	LAMC2	LAMC2	LAMC2-001,LAMC2-003	1	183155391	183155497	71.15	0.01	0.021	0.021	0	3	rs684527,rs77133472,rs2276542	0.09	0.11	0.08	1.3	2.29	0.69
5S_rRNA	LINC01035	LINC01035	LINC01035-001	1	188873178	188873278	67.32	0.021	0.033	0.021	0	3	.,rs146998445,rs73052406	0.26	0.21	0.22	#-nan	-0.84	0.06
5S_rRNA	MGST3	MGST3	MGST3-009,MGST3-014	1	165618563	165618660	65.12	0.01	0	0	0						#-nan	#-nan	#-nan
5S_rRNA	MPZL1	MPZL1	MPZL1-001,MPZL1-004,MPZL1-005,MPZL1-006,MPZL1-008,MPZL1-011	1	167691528	167691636	73.85	0.02	0	0	0						#-nan	#-nan	#-nan
5S_rRNA	MPZL1	MPZL1	MPZL1-010	1	167740833	167740928	62.57	0.047	0	0.011	0						#-nan	#-nan	#-nan
5S_rRNA	NAV1	NAV1	NAV1-001,NAV1-201,NAV1-202,NAV1-203	1	201617670	201617776	69.3	0	0	0	0						#-nan	#-nan	#-nan
5S_rRNA	NEK7	NEK7	NEK7-001,NEK7-003,NEK7-005,NEK7-006	1	198126194	198126321	85.68	0.017	0	0.007	0						#-nan	#-nan	#-nan
5S_rRNA	NEK7	NEK7	NEK7-001,NEK7-003,NEK7-005,NEK7-006	1	198126181	198126317	92.62	0.017	0	0.007	0	1	rs149557493	0	#-nan	0	-0.97	#-nan	#-nan
5S_rRNA	NEK7	NEK7	NEK7-007	1	198173746	198173845	65.93	0.046	0	0	0						#-nan	#-nan	#-nan
5S_rRNA	NME7	NME7	NME7-015	1	169160074	169160170	62.96	10	0	0	0						#-nan	#-nan	#-nan
5S_rRNA	NOS1AP	NOS1AP	NOS1AP-001,NOS1AP-008,NOS1AP-009	1	162039367	162039501	89.65	0.016	0.008	0.008	0.008	1	rs12044487	0.01	0.06	0.07	1.2	1.96	1.58
5S_rRNA	NPHS2,RNU5F-2P	NPHS2,RNU5F-2P	NPHS2-001,NPHS2-002,RNU5F-2P-201	1	179544828	179544969	94.07	0.023	0.021	0.021	0	1	rs1079292	0.15	0.15	0.14	-0.97	-0.9	0.68
5S_rRNA	NPHS2,RNU5F-2P	NPHS2,RNU5F-2P	NPHS2-001,NPHS2-002,RNU5F-2P-201	1	179544846	179545041	130.25	0.023	0.021	0.021	0	2	rs1079292,rs144425595	0.15	0.15	0.14	-1.31	-0.9	0.68
5S_rRNA	NPL	NPL	NPL-001,NPL-002,NPL-003,NPL-004,NPL-005,NPL-006,NPL-007,NPL-204	1	182758868	182759001	88.44	0.018	0.008	0	0.008						#-nan	#-nan	#-nan
5S_rRNA	NPL	NPL	NPL-001,NPL-002,NPL-003,NPL-004,NPL-005,NPL-006,NPL-007,NPL-204	1	182758864	182758983	79.6	0.018	0.008	0	0.008						#-nan	#-nan	#-nan
5S_rRNA	NR5A2	NR5A2	NR5A2-001,NR5A2-002,NR5A2-003,NR5A2-004	1	199993869	199993989	78.39	0.059	0	0.036	0						#-nan	#-nan	#-nan
5S_rRNA	PAPPA2	PAPPA2	PAPPA2-004	1	176521445	176521575	89.01	0.016	0.008	0.016	0.008	1	rs60527290	0.21	0.27	0.2	0.1	-0.21	1.86
5S_rRNA	PBX1	PBX1	PBX1-001,PBX1-002,PBX1-006,PBX1-007,PBX1-010,PBX1-012,PBX1-020,PBX1-201,PBX1-202	1	164528255	164528372	76.82	0.074	0.113	0.119	0						#-nan	#-nan	#-nan
5S_rRNA	PCP4L1	PCP4L1	PCP4L1-001	1	161228227	161228333	71.15	0.031	0.01	0.01	0.01	1	rs4657000	0.04	0.04	0.08	1.56	1.79	1.94
5S_rRNA	PHLDA3	PHLDA3	PHLDA3-001,PHLDA3-002,PHLDA3-003,PHLDA3-004	1	201437991	201438116	88.61	0	0	0.008	0	2	rs145312394,rs11546147	0.07	0.12	0.17	-0.7	0.65	0.85
5S_rRNA	POGK	POGK	POGK-001,POGK-002,POGK-003,POGK-201,POGK-202	1	166808849	166809024	120.89	0	0.006	0.006	0	1	.	0.11	#-nan	0.11	0.16	#-nan	#-nan
5S_rRNA	POU2F1,RP11-277B15.3	POU2F1,POU2F1-DT	POU2F1-001,POU2F1-002,POU2F1-004,POU2F1-006,POU2F1-007,POU2F1-010,POU2F1-011,POU2F1-015,POU2F1-016,POU2F1-201,POU2F1-202,POU2F1-203,RP11-277B15.3-001	1	167190461	167190810	237.46	0.015	0.003	0.006	0.003	1	rs34595166	0.03	#-nan	0.03	-0.63	#-nan	#-nan
5S_rRNA	POU2F1,RP11-277B15.3	POU2F1,POU2F1-DT	POU2F1-001,POU2F1-002,POU2F1-004,POU2F1-006,POU2F1-007,POU2F1-010,POU2F1-011,POU2F1-015,POU2F1-016,POU2F1-201,POU2F1-202,POU2F1-203,RP11-277B15.3-001	1	167190462	167190817	237.18	0.015	0.003	0.006	0.003	1	rs34595166	0.03	#-nan	0.03	-0.63	#-nan	#-nan
5S_rRNA	PRDX6	PRDX6	PRDX6-001,PRDX6-002	1	173446233	173446395	110.57	0.04	0.006	0.006	0	2	rs35581908,.	0.17	0.18	0.17	#-nan	#-nan	0.94
5S_rRNA	PRRC2C	PRRC2C	PRRC2C-001,PRRC2C-003,PRRC2C-005,PRRC2C-010,PRRC2C-201,PRRC2C-202	1	171452392	171452501	70.2	0.042	0	0.01	0	1	.	0.11	0.15	0.07	0.26	0.69	-0.97
5S_rRNA	PRRX1,RP1-79C4.4	PRRX1,RP1-79C4.4	PRRX1-001,PRRX1-002,PRRX1-005,RP1-79C4.4-001	1	170633608	170633698	61.69	0	0.011	0.011	0	1	rs113383048	0.04	0.04	0.04	#-nan	#-nan	-0.51
5S_rRNA	PTGS2,RP5-973M2.2	PTGS2,RP5-973M2.2	PTGS2-001,PTGS2-002,PTGS2-004,PTGS2-005,RP5-973M2.2-001	1	186649312	186649446	88.31	0	0.021	0.021	0	1	rs191808038	#-nan	0	0	#-nan	-0.96	#-nan
5S_rRNA	RABGAP1L,RP11-160H22.5	RABGAP1L,RABGAP1L-DT	RABGAP1L-001,RABGAP1L-002,RABGAP1L-003,RABGAP1L-201,RP11-160H22.5-001,RP11-160H22.5-002,RP11-160H22.5-003,RP11-160H22.5-004	1	174128501	174128634	88.44	0.034	0	0.008	0						#-nan	#-nan	#-nan
5S_rRNA	RALGPS2,RP11-428K3.1	RALGPS2,RALGPS2-AS1	RALGPS2-001,RALGPS2-002,RALGPS2-003,RALGPS2-201,RP11-428K3.1-001	1	178694596	178694785	128.93	0.005	0.005	0.005	0.005						#-nan	#-nan	#-nan
5S_rRNA	RASAL2,RASAL2-AS1	RASAL2,RASAL2-AS1	RASAL2-002,RASAL2-201,RASAL2-AS1-001,RASAL2-AS1-002,RASAL2-AS1-003	1	178063191	178063329	90.68	0	0	0.008	0	1	rs116226039	0.16	0.17	0.16	#-nan	#-nan	0.59
5S_rRNA	RC3H1,RP11-160H22.3	RC3H1,RC3H1-DT	RC3H1-003,RP11-160H22.3-001	1	173991224	173991351	87.77	0	0	0	0						#-nan	#-nan	#-nan
5S_rRNA	RC3H1,RP11-160H22.3	RC3H1,RC3H1-DT	RC3H1-003,RP11-160H22.3-001	1	173991242	173991422	121	0	0	0	0						#-nan	#-nan	#-nan
5S_rRNA	RCSD1,RP3-455J7.4	RCSD1,RP3-455J7.4	RCSD1-001,RCSD1-002,RCSD1-003,RCSD1-004,RCSD1-005,RCSD1-201,RP3-455J7.4-001	1	167599426	167599553	84.42	0.008	0.008	0.017	0	1	rs3738220	0.06	0.17	0.09	0.37	1.23	-0.64
5S_rRNA	RCSD1,RP3-455J7.4	RCSD1,RP3-455J7.4	RCSD1-001,RCSD1-002,RCSD1-003,RCSD1-004,RCSD1-005,RCSD1-201,RP3-455J7.4-001	1	167599465	167599706	159.19	0.008	0.008	0.017	0	4	rs3738221,rs3738220,rs147054997,rs200669865	0.13	0.15	0.09	0.87	0.52	-0.94
5S_rRNA	RFWD2,RP11-195C7.1	COP1,COP1-DT	RFWD2-001,RFWD2-002,RFWD2-006,RFWD2-007,RFWD2-009,RFWD2-010,RP11-195C7.1-001	1	176175878	176176137	175.44	0.026	0	0.017	0	2	rs140755121,rs115466880	0.15	0.07	0.09	-1.21	-0.42	0.99
5S_rRNA	RFWD2,RP11-195C7.1	COP1,COP1-DT	RFWD2-001,RFWD2-002,RFWD2-006,RFWD2-007,RFWD2-009,RFWD2-010,RP11-195C7.1-001	1	176176354	176176479	83.62	0.026	0	0.017	0	2	rs3833529,rs144677485	0.01	0.03	0.04	-0.44	-0.9	-0.77
5S_rRNA	RGL1	RGL1	RGL1-002,RGL1-202	1	183774236	183774360	81.18	0	0	0	0						#-nan	#-nan	#-nan
5S_rRNA	RNF2	RNF2	RNF2-001,RNF2-002,RNF2-003,RNF2-004	1	185014751	185014910	106.13	0.027	0	0.006	0	1	rs117020114	0.01	0.08	0.09	#-nan	0.25	-0.9
5S_rRNA	RNPEP	RNPEP	RNPEP-001,RNPEP-002,RNPEP-003,RNPEP-004,RNPEP-005,RNPEP-006,RNPEP-007,RNPEP-008,RNPEP-009,RNPEP-010	1	201951718	201951835	81.14	0.04	0	0.009	0.027						#-nan	#-nan	#-nan
5S_rRNA	RNPEP	RNPEP	RNPEP-001,RNPEP-002,RNPEP-003,RNPEP-004,RNPEP-005,RNPEP-006,RNPEP-007,RNPEP-008,RNPEP-009,RNPEP-010,RNPEP-014(*)	1	201951717	201951834	80.32	0.04	0	0.009	0.027						#-nan	#-nan	#-nan
5S_rRNA	RNU6-609P	RNU6-609P	RNU6-609P-201	1	199984245	199984354	71.28	0.009	0	0	0	1	rs200929557	0.03	0.04	0.04	#-nan	#-nan	-0.97
5S_rRNA	RP11-277B15.2	RP11-277B15.2	RP11-277B15.2-001,RP11-277B15.2-002,RP11-277B15.2-003,RP11-277B15.2-004	1	167164693	167164807	74.84	0	0	0	0						#-nan	#-nan	#-nan
5S_rRNA	RP11-277B15.2	RP11-277B15.2	RP11-277B15.2-001,RP11-277B15.2-002,RP11-277B15.2-003,RP11-277B15.2-004	1	167164692	167164800	72.76	0	0	0	0						#-nan	#-nan	#-nan
5S_rRNA	RP11-309H21.3	RP11-309H21.3	RP11-309H21.3-001	1	191120569	191120669	66.33	0.063	0	0.063	0	4	rs114673553,rs116125156,rs191942891,rs12405543	0.1	0.04	0.05	0	0.9	0.97
5S_rRNA	RP11-312J18.6,RP11-544M22.1	RP11-312J18.6,RP11-544M22.1	RP11-312J18.6-001,RP11-544M22.1-001	1	160903153	160903381	156.91	0.133	0.004	0.039	0	4	rs111849547,rs190195640,rs111665227,rs141666761	0.12	0.06	0.07	0.57	1.4	1.47
5S_rRNA	RP11-312J18.6,RP11-544M22.1	RP11-312J18.6,RP11-544M22.1	RP11-312J18.6-001,RP11-544M22.1-001	1	160903134	160903376	166.84	0.133	0.004	0.039	0	4	rs111849547,rs190195640,rs111665227,rs141666761	0.12	0.06	0.07	0.57	1.4	1.47
5S_rRNA	RP11-359K18.3,UAP1	UAP1-DT,UAP1	RP11-359K18.3-001,UAP1-001,UAP1-004,UAP1-201	1	162531618	162531717	66.91	0.029	0	0	0						#-nan	#-nan	#-nan
5S_rRNA	RP11-359K18.3,UAP1	UAP1-DT,UAP1	RP11-359K18.3-001,UAP1-001,UAP1-004,UAP1-201	1	162531592	162531710	80.38	0.029	0	0	0						#-nan	#-nan	#-nan
5S_rRNA	RP11-46A10.4	RP11-46A10.4	RP11-46A10.4-001	1	180923003	180923159	106.49	0	0	0	0	1	rs143596193	0.04	0	0.04	1.76	1.69	1.53
5S_rRNA	RP11-541F9.1	RP11-541F9.1	RP11-541F9.1-002	1	191860286	191860401	77.18	0.045	0	0	0	2	.,rs199696208	0.05	0.08	0.04	0.56	1.14	-0.58
5S_rRNA	SELL	SELL	SELL-001,SELL-002,SELL-003,SELL-004	1	169681018	169681120	69.77	0.01	0	0	0						#-nan	#-nan	#-nan
5S_rRNA	SMG7,SMG7-AS1	SMG7,SMG7-AS1	SMG7-001,SMG7-002,SMG7-003,SMG7-005,SMG7-008,SMG7-010,SMG7-011,SMG7-013,SMG7-014,SMG7-015,SMG7-017,SMG7-201,SMG7-AS1-001,SMG7-AS1-002,SMG7-AS1-003(*)	1	183441458	183441582	81.97	0	0	0.008	0	1	.	0	#-nan	0	-0.97	#-nan	#-nan
5S_rRNA	SOAT1	SOAT1	SOAT1-001,SOAT1-002,SOAT1-201,SOAT1-202,SOAT1-203	1	179262805	179262925	80.8	0	0	0.009	0	1	rs193133391	#-nan	0.09	0.09	#-nan	0.05	#-nan
5S_rRNA	SUCO	SUCO	SUCO-001,SUCO-002,SUCO-004,SUCO-005,SUCO-201,SUCO-202(*)	1	172502246	172502396	100.9	0.014	0.007	0.014	0.007	2	rs2285143,rs78561962	0.08	0.17	0.1	1.27	0.69	0.83
5S_rRNA	SWT1,TRMT1L	SWT1,TRMT1L	SWT1-001,SWT1-002,SWT1-003,TRMT1L-001,TRMT1L-002,TRMT1L-201	1	185125643	185125793	100.9	0.007	0	0.014	0	1	rs2273879	#-nan	0	0	#-nan	-0.83	#-nan
5S_rRNA	SWT1,TRMT1L	SWT1,TRMT1L	SWT1-001,SWT1-002,SWT1-003,TRMT1L-001,TRMT1L-002,TRMT1L-201	1	185125632	185125749	78.79	0.007	0	0.014	0	1	rs2273879	#-nan	0	0	#-nan	-0.83	#-nan
5S_rRNA	SWT1,TRMT1L	SWT1,TRMT1L	SWT1-001,SWT1-002,SWT1-003,TRMT1L-001,TRMT1L-002,TRMT1L-201	1	185126506	185126659	99.06	0.007	0	0.014	0						#-nan	#-nan	#-nan
5S_rRNA	TADA1	TADA1	TADA1-001	1	166844977	166845071	63.11	0.023	0.011	0.011	0.023	1	rs2072740	0.01	0.08	0.04	1.81	1.96	1.56
5S_rRNA	TAGLN2	TAGLN2	TAGLN2-001,TAGLN2-002,TAGLN2-003,TAGLN2-004,TAGLN2-005	1	159894754	159894884	83.33	0	0	0.008	0						#-nan	#-nan	#-nan
5S_rRNA	TMCO1,UCK2	TMCO1,UCK2	TMCO1-006,UCK2-001,UCK2-201	1	165797230	165797320	62.58	0.012	0	0.012	0						#-nan	#-nan	#-nan
5S_rRNA	TMCO1,UCK2	TMCO1,UCK2	TMCO1-006,UCK2-001,UCK2-201	1	165797205	165797314	75.6	0.012	0	0.012	0						#-nan	#-nan	#-nan
5S_rRNA	TOR3A	TOR3A	TOR3A-001,TOR3A-002,TOR3A-003,TOR3A-004,TOR3A-005,TOR3A-006,TOR3A-007	1	179051601	179051755	101.77	0.007	0	0.014	0	2	rs78417185,rs191737818	0	0.05	0.04	-0.13	#-nan	-0.65
5S_rRNA	TSEN15	TSEN15	TSEN15-001,TSEN15-002,TSEN15-003,TSEN15-004,TSEN15-005,TSEN15-006,TSEN15-007	1	184020859	184020956	66.1	0.011	0	0.022	0	2	rs2274432,rs199936857	0.12	0.19	0.1	1.7	1.92	-0.37
5S_rRNA	ABI1	ABI1	ABI1-001,ABI1-002,ABI1-003,ABI1-004,ABI1-005,ABI1-006,ABI1-007,ABI1-009,ABI1-201,ABI1-202,ABI1-203,ABI1-204,ABI1-205,ABI1-206	10	27149159	27149277	79.19	0.041	0	0.013	0						#-nan	#-nan	#-nan
5S_rRNA	AC022400.2,FUT11	AC022400.2,FUT11	AC022400.2-201,FUT11-001,FUT11-002,FUT11-004,FUT11-201	10	75531992	75532092	66.33	0.022	0.013	0.013	0.013						#-nan	#-nan	#-nan
5S_rRNA	ACBD5,RP11-85G18.6	ACBD5,RP11-85G18.6	ACBD5-001,ACBD5-002,ACBD5-003,ACBD5-004,ACBD5-005,ACBD5-006,ACBD5-007,ACBD5-201,RP11-85G18.6-001	10	27529657	27529763	70.09	0.02	0	0	0						#-nan	#-nan	#-nan
5S_rRNA	ADAMTS14	ADAMTS14	ADAMTS14-001,ADAMTS14-002	10	72432166	72432348	125.44	0.018	0.006	0.018	0.011	1	rs117927780	0.01	0.34	0.26	1.94	-0.6	1.86
5S_rRNA	ADK,AP3M1	ADK,AP3M1	ADK-001,ADK-004,ADK-201,AP3M1-001,AP3M1-002,AP3M1-004	10	75911309	75911428	81.97	0.027	0.018	0.018	0.018	2	rs10824083,rs10824084	0.23	0.27	0.2	0.21	-0.06	2.56
5S_rRNA	ADO,RP11-436D10.3	ADO,RP11-436D10.3	ADO-001,RP11-436D10.3-001	10	64564606	64564772	113.02	0	0	0.006	0	1	rs146318332	0.01	0.01	0.01	#-nan	#-nan	-0.83
5S_rRNA	ADO,RP11-436D10.3	ADO,RP11-436D10.3	ADO-001,RP11-436D10.3-001	10	64564605	64564770	111.79	0	0	0.006	0	1	rs146318332	0.01	0.01	0.01	#-nan	#-nan	-0.83
5S_rRNA	AKR1C3	AKR1C3	AKR1C3-002,AKR1C3-003,AKR1C3-007	10	5074819	5074919	69.3	0.113	0.01	0.044	0	3	rs71485422,rs139496916,rs7897300	0.06	0	0.04	0.52	1.94	1.12
5S_rRNA	AKR1E2	AKR1E2	AKR1E2-002,AKR1E2-004,AKR1E2-006,AKR1E2-008,AKR1E2-009,AKR1E2-010,AKR1E2-011,AKR1E2-014	10	4868599	4868699	68.14	0	0	0	0						#-nan	#-nan	#-nan
5S_rRNA	AKR1E2	AKR1E2	AKR1E2-002,AKR1E2-004,AKR1E2-006,AKR1E2-008,AKR1E2-009,AKR1E2-010,AKR1E2-011,AKR1E2-014	10	4868598	4868699	68.54	0	0	0	0						#-nan	#-nan	#-nan
5S_rRNA	AL359832.1,UNC5B	AL359832.1,UNC5B	AL359832.1-201,UNC5B-001,UNC5B-002	10	72972563	72972693	89.84	0	0	0	0						#-nan	#-nan	#-nan
5S_rRNA	ALDH18A1	ALDH18A1	ALDH18A1-001,ALDH18A1-002,ALDH18A1-004	10	97416128	97416255	86.5	0	0.048	0.008	0.026	3	rs190571103,rs72408820,.	0.06	0.03	0.05	#-nan	#-nan	-0.26
5S_rRNA	ALOX5	ALOX5	ALOX5-001,ALOX5-201,ALOX5-202(*)	10	45869581	45869718	94.66	0.015	0.024	0.034	0.024	3	rs4987106,rs78137087,rs72561472	0	0.01	0	1.26	0.59	1.42
5S_rRNA	ANAPC16,ASCC1	ANAPC16,ASCC1	ANAPC16-001,ANAPC16-003,ASCC1-003,ASCC1-004,ASCC1-006,ASCC1-008,ASCC1-010,ASCC1-011,ASCC1-012,ASCC1-013,ASCC1-014,ASCC1-016,ASCC1-021,ASCC1-201,ASCC1-202,ASCC1-203,ANAPC16-201(*),ANAPC16-202(*)	10	73975742	73975880	91.48	0	0	0	0	1	rs77950940	0.01	0.01	0.01	#-nan	#-nan	-0.9
5S_rRNA	ANK3,RP11-131N11.4	ANK3,ANK3-DT	ANK3-004,ANK3-018,RP11-131N11.4-001	10	62492891	62493045	104.04	0.013	0	0.014	0	2	rs193275676,rs185421325	0.02	0.02	0.02	#-nan	-0.77	-0.77
5S_rRNA	ANKRD16,FBXO18	ANKRD16,FBH1	ANKRD16-001,ANKRD16-002,ANKRD16-003,ANKRD16-005,FBXO18-009,FBXO18-012,FBXO18-013,FBXO18-201	10	5932401	5932499	68.46	0.021	0.01	0.021	0.01	2	rs10905405,rs10905406	0.2	0.57	0.37	2.05	1.84	-0.32
5S_rRNA	ANKRD16,FBXO18	ANKRD16,FBH1	ANKRD16-001,ANKRD16-002,ANKRD16-003,ANKRD16-005,FBXO18-009,FBXO18-012,FBXO18-013,FBXO18-201	10	5931170	5931323	100.58	0.021	0.01	0.021	0.01	1	rs3750659	0.05	0.09	0.04	-0.44	0	#-nan
5S_rRNA	ANKRD16,FBXO18	ANKRD16,FBH1	ANKRD16-001,ANKRD16-002,ANKRD16-003,ANKRD16-005,FBXO18-009,FBXO18-012,FBXO18-013,FBXO18-201	10	5932210	5932325	78.66	0.021	0.01	0.021	0.01						#-nan	#-nan	#-nan
5S_rRNA	ANTXRL	ANTXRL	ANTXRL-006,ANTXRL-005(*)	10	47664647	47664780	90.58	0	0	0	0	1	rs10546433	0.13	0	0.08	0.52	0.93	-0.9
5S_rRNA	APBB1IP	APBB1IP	APBB1IP-001,APBB1IP-003	10	26727644	26727788	97.51	0.007	0	0.015	0	2	rs2992334,rs4749126	0	0.4	0.25	2.57	-0.42	2.62
5S_rRNA	ARHGAP12	ARHGAP12	ARHGAP12-005	10	32143960	32144075	74.88	0.009	0.009	0.009	0	1	.	0.04	0.22	0.12	1.76	1.87	1.13
5S_rRNA	ARHGAP12	ARHGAP12	ARHGAP12-008,ARHGAP12-009,ARHGAP12-201,ARHGAP12-202	10	32217799	32217934	90.85	0.032	0	0.008	0						#-nan	#-nan	#-nan
5S_rRNA	ARHGAP19,ARHGAP19-SLIT1	ARHGAP19,ARHGAP19-SLIT1	ARHGAP19-004,ARHGAP19-006,ARHGAP19-SLIT1-001,ARHGAP19-SLIT1-201,ARHGAP19-SLIT1-202,ARHGAP19-SLIT1-203,ARHGAP19-003(*)	10	99052071	99052164	61.78	0.085	0	0.023	0	2	rs12356559,rs77523571	0.02	0	0.01	-0.63	-0.6	-0.64
5S_rRNA	ARHGAP21	ARHGAP21	ARHGAP21-001,ARHGAP21-002,ARHGAP21-003,ARHGAP21-007,ARHGAP21-008,ARHGAP21-011,ARHGAP21-012	10	25012567	25012733	114.68	0.107	0.013	0.013	0						#-nan	#-nan	#-nan
5S_rRNA	ARHGAP21	ARHGAP21	ARHGAP21-001,ARHGAP21-002,ARHGAP21-003,ARHGAP21-007,ARHGAP21-008,ARHGAP21-011,ARHGAP21-012,ARHGAP21-201(*),ARHGAP21-202(*)	10	25012572	25012734	112.19	0.107	0.013	0.013	0						#-nan	#-nan	#-nan
5S_rRNA	ARHGAP22	ARHGAP22	ARHGAP22-006	10	49732178	49732301	85.28	0.017	0.008	0.008	0.008						#-nan	#-nan	#-nan
5S_rRNA	ARHGAP22	ARHGAP22	ARHGAP22-008	10	49864284	49864459	118.32	0.032	0.012	0.006	0	1	.	0.2	0.43	0.29	2.23	2.04	-0.09
5S_rRNA	ARMC4,RP11-218D6.4	ODAD2,RP11-218D6.4	ARMC4-001,ARMC4-004,RP11-218D6.4-001	10	28287410	28287545	92.74	0.023	0	0.007	0	1	rs184897637	0.01	0.01	0.01	#-nan	#-nan	-0.83
5S_rRNA	ASB13	ASB13	ASB13-004,ASB13-005,ASB13-006	10	5708354	5708567	144.43	0.031	0.005	0.02	0.005	4	rs6602613,rs75474563,rs76394459,rs56178329	0.01	0.09	0.07	1.8	1.67	2.47
5S_rRNA	ASCC1	ASCC1	ASCC1-015	10	73957802	73957946	96.08	1.253	0.031	0.03	0						#-nan	#-nan	#-nan
5S_rRNA	ATOH7	ATOH7	ATOH7-001	10	69991310	69991459	99.7	0.014	0	0	0						#-nan	#-nan	#-nan
5S_rRNA	ATP5C1,KIN	ATP5F1C,KIN	ATP5C1-001,ATP5C1-002,ATP5C1-003,ATP5C1-004,ATP5C1-005,ATP5C1-006,ATP5C1-007,ATP5C1-008,ATP5C1-201,KIN-001,KIN-201,KIN-202	10	7830311	7830410	67.73	0.023	0.011	0.011	0.011	1	rs1475406	0.11	0.25	0.16	0.1	-0.71	1.51
5S_rRNA	BAMBI	BAMBI	BAMBI-001,BAMBI-002	10	28966158	28966309	104.33	0.014	0.014	0.022	0.007	2	rs7099888,rs71492575;rs564241355	0.14	0.29	0.19	1.21	2.34	-0.57
5S_rRNA	BEND7,RP11-214D15.2	BEND7,BEND7-DT	BEND7-005,BEND7-201,BEND7-202,RP11-214D15.2-001	10	13570951	13571213	180.09	0.479	0	0	0						#-nan	#-nan	#-nan
5S_rRNA	BICC1	BICC1	BICC1-002	10	60272577	60272943	249.29	0.006	0.003	0.008	0.011	3	rs184291321,rs112597538,rs192719190	0.05	0.04	0.03	1.93	0.76	1.21
5S_rRNA	BLOC1S2	BLOC1S2	BLOC1S2-001,BLOC1S2-002,BLOC1S2-003,BLOC1S2-004,BLOC1S2-201(*)	10	102046390	102046496	74.34	0.01	0.01	0.043	0.01	3	rs12251791,rs112277698,rs12250221	0.31	0.32	0.32	#-nan	#-nan	-0.03
5S_rRNA	BMI1	BMI1	BMI1-001,BMI1-002,BMI1-009,BMI1-011	10	22610687	22610909	152.77	0.075	0	0	0						#-nan	#-nan	#-nan
5S_rRNA	BMI1	BMI1	BMI1-005,BMI1-006,BMI1-007,BMI1-008,BMI1-010,BMI1-012	10	22614424	22614591	111.76	0.015	0	0.006	0	1	rs11012946	0.17	0.18	0.17	#-nan	#-nan	0.68
5S_rRNA	BMPR1A,RP11-359E3.4	BMPR1A,RP11-359E3.4	BMPR1A-001,RP11-359E3.4-001	10	88516239	88516342	68.34	0.01	0	0	0	1	rs61858562	0.19	0.53	0.34	#-nan	#-nan	#-nan
5S_rRNA	BTAF1	BTAF1	BTAF1-001	10	93683668	93683806	94.81	0	0	0	0						#-nan	#-nan	#-nan
5S_rRNA	C10orf107	CABCOCO1	C10orf107-001,C10orf107-002	10	63422561	63422728	111.76	0.033	0	0	0						#-nan	#-nan	#-nan
5S_rRNA	C10orf25,ZNF22	ZNF22-AS1,ZNF22	C10orf25-001,ZNF22-001	10	45496370	45496595	153	0.009	0	0.014	0	3	rs77354769,.,rs140805641	0.05	0	0.02	-0.37	0.3	-0.1
5S_rRNA	C10orf76	ARMH3	C10orf76-005	10	103795793	103796013	149.74	0.034	0	0.009	0	2	.,rs192922160	0.11	0.09	0.06	0.97	0.81	-0.56
5S_rRNA	C1QL3	C1QL3	C1QL3-001,C1QL3-201(*)	10	16562722	16562842	82.01	0.009	0	0	0						#-nan	#-nan	#-nan
5S_rRNA	CACNB2	CACNB2	CACNB2-001,CACNB2-002,CACNB2-008,CACNB2-009,CACNB2-010,CACNB2-011,CACNB2-012	10	18429329	18429566	160.75	0.006	0	0.019	0	2	rs55822580,rs12764271	0.03	0.13	0.12	-0.42	1.38	-0.26
5S_rRNA	CACNB2	CACNB2	CACNB2-001,CACNB2-002,CACNB2-008,CACNB2-009,CACNB2-010,CACNB2-011,CACNB2-012	10	18429308	18429480	118.82	0.006	0	0.019	0	2	rs55822580,rs12764271	0.03	0.13	0.12	-0.42	1.38	-0.26
5S_rRNA	CACNB2	CACNB2	CACNB2-006,CACNB2-007,CACNB2-201(*),CACNB2-202(*)	10	18627550	18627641	61.2	0.18	0	0.097	0	4	.,rs148651095,.,rs145604405	0.21	0.31	0.2	1.44	2.86	1.65
5S_rRNA	CAMK2G	CAMK2G	CAMK2G-001,CAMK2G-002,CAMK2G-004,CAMK2G-005,CAMK2G-006,CAMK2G-201,CAMK2G-202,CAMK2G-203,CAMK2G-204	10	75634381	75634513	86.72	0.034	0.025	0	0						#-nan	#-nan	#-nan
5S_rRNA	CASC10,MIR1915	MIR1915HG,MIR1915	CASC10-001,MIR1915-201	10	21786128	21786261	88.44	0.016	0	0.008	0	1	rs73592575	0.01	0.01	0.01	-0.7	-0.65	-0.26
5S_rRNA	CCAR1	CCAR1	CCAR1-001,CCAR1-003,CCAR1-009,CCAR1-010,CCAR1-011,CCAR1-012,CCAR1-013,CCAR1-014,CCAR1-015,CCAR1-017,CCAR1-018,CCAR1-201	10	70481208	70481330	80.39	0.017	0.008	0.008	0.008	1	rs2275935	0.17	0.04	0.1	0.66	-0.42	#-nan
5S_rRNA	CCDC3	CCDC3	CCDC3-002	10	13043498	13043599	67.54	0	0	0	0						#-nan	#-nan	#-nan
5S_rRNA	CCDC6	CCDC6	CCDC6-001	10	61666179	61666289	75.76	0	0	0.02	0	1	rs186214619	0.02	#-nan	0.02	-0.76	#-nan	#-nan
5S_rRNA	CCNJ,ENTPD1-AS1	CCNJ,ENTPD1-AS1	CCNJ-002,CCNJ-003,CCNJ-004,CCNJ-201,ENTPD1-AS1-010	10	97803419	97803551	88.84	0.015	0	0.008	0						#-nan	#-nan	#-nan
5S_rRNA	CCNY,RP11-324I22.4	CCNY,CCNY-AS1	CCNY-002,CCNY-003,CCNY-201,CCNY-202,RP11-324I22.4-001	10	35625670	35625886	148.63	0.005	0.005	0.005	0.005						#-nan	#-nan	#-nan
5S_rRNA	CCNY,RP11-324I22.4	CCNY,CCNY-AS1	CCNY-002,CCNY-003,CCNY-201,CCNY-202,RP11-324I22.4-001	10	35625690	35625891	138.28	0.005	0.005	0.005	0.005						#-nan	#-nan	#-nan
5S_rRNA	CCNY	CCNY	CCNY-008	10	35720280	35720398	76.83	0.227	0.058	0.019	0						#-nan	#-nan	#-nan
5S_rRNA	CCSER2	CCSER2	CCSER2-001,CCSER2-002,CCSER2-201	10	86088479	86088735	174.22	0.012	0	0	0						#-nan	#-nan	#-nan
5S_rRNA	CDH23	CDH23	CDH23-002,CDH23-003,CDH23-202,CDH23-203,CDH23-001(*),CDH23-205(*)	10	73156491	73156620	85.54	0.016	0.008	0.008	0.008	1	rs190035485	0.12	0.06	0.07	-0.7	-0.26	0.81
5S_rRNA	CDHR1	CDHR1	CDHR1-001,CDHR1-002	10	85954386	85954517	87.64	0.016	0	0.016	0	2	rs114273269,rs183065817	0.05	0.05	0.05	#-nan	#-nan	-0.91
5S_rRNA	CDK1	CDK1	CDK1-007,CDK1-008,CDK1-009,CDK1-010,CDK1-013,CDK1-014,CDK1-201,CDK1-202(*)	10	62538447	62538559	74.37	0.019	0.021	0.021	0	1	rs141276080	#-nan	0	0	#-nan	-0.96	#-nan
5S_rRNA	CDNF,HSPA14	CDNF,HSPA14	CDNF-001,CDNF-002,CDNF-003,CDNF-004,HSPA14-001,HSPA14-003,HSPA14-004,HSPA14-005,HSPA14-006	10	14880688	14880793	71.81	0.01	0	0.02	0	1	rs76473928	0.15	0.16	0.15	#-nan	#-nan	0.54
5S_rRNA	CELF2	CELF2	CELF2-001,CELF2-002,CELF2-003,CELF2-004,CELF2-005,CELF2-006,CELF2-205,CELF2-207	10	11207776	11207881	69.7	0	0	0	0						#-nan	#-nan	#-nan
5S_rRNA	CELF2	CELF2	CELF2-001,CELF2-002,CELF2-003,CELF2-004,CELF2-005,CELF2-006,CELF2-205,CELF2-207	10	11207792	11207886	62.31	0	0	0	0						#-nan	#-nan	#-nan
5S_rRNA	CELF2	CELF2	CELF2-202,CELF2-204,CELF2-206,CELF2-208	10	11060341	11060554	144.43	0.015	0	0.005	0	1	rs141491836	0.02	0.02	0.04	-0.19	#-nan	-0.77
5S_rRNA	CISD1,IPMK	CISD1,IPMK	CISD1-001,CISD1-003,IPMK-001	10	60027694	60027794	65.34	0	0	0	0						#-nan	#-nan	#-nan
5S_rRNA	COMMD3,COMMD3-BMI1	COMMD3,COMMD3-BMI1	COMMD3-001,COMMD3-002,COMMD3-003,COMMD3-004,COMMD3-006,COMMD3-009,COMMD3-010,COMMD3-011,COMMD3-012,COMMD3-013,COMMD3-014,COMMD3-015,COMMD3-016,COMMD3-017,COMMD3-018,COMMD3-BMI1-002,COMMD3-BMI1-003,COMMD3-BMI1-004,COMMD3-BMI1-005,COMMD3-BMI1-006	10	22605172	22605287	77.18	0.019	0	0	0						#-nan	#-nan	#-nan
5S_rRNA	CPEB3,MARCHF5	CPEB3,MARCHF5	CPEB3-002,MARCHF5-001	10	94050975	94051086	75.07	0.019	0.021	0.021	0	3	rs746842,rs2274454,rs115311029	0.23	0.12	0.13	1.45	0.73	-0.7
5S_rRNA	CPEB3,MARCHF5	CPEB3,MARCHF5	CPEB3-002,MARCHF5-001	10	94050979	94051087	74.11	0.019	0.021	0.021	0	3	rs746842,rs2274454,rs115311029	0.23	0.12	0.13	1.45	0.73	-0.7
5S_rRNA	CREM,RP11-297A16.2	CREM,RP11-297A16.2	CREM-001,CREM-002,CREM-016,CREM-017,CREM-018,CREM-023,CREM-032,CREM-036,CREM-038,CREM-039,CREM-040,CREM-041,CREM-042,CREM-043,CREM-044,CREM-045,CREM-046,CREM-047,CREM-048,CREM-049,CREM-202,CREM-203,RP11-297A16.2-001,RP11-297A16.2-003,RP11-297A16.2-004	10	35415706	35415807	66.53	0.018	0.014	0.015	0						#-nan	#-nan	#-nan
5S_rRNA	CREM,RP11-297A16.2	CREM,RP11-297A16.2	CREM-001,CREM-002,CREM-016,CREM-017,CREM-018,CREM-023,CREM-032,CREM-036,CREM-038,CREM-039,CREM-040,CREM-041,CREM-042,CREM-043,CREM-044,CREM-045,CREM-046,CREM-047,CREM-048,CREM-049,CREM-202,CREM-203,RP11-297A16.2-001,RP11-297A16.2-003,RP11-297A16.2-004	10	35415896	35416053	106.08	0.018	0.014	0.015	0	1	rs116806817	0.06	0.07	0.07	#-nan	#-nan	-0.26
5S_rRNA	CREM,RP11-297A16.2	CREM,RP11-297A16.2	CREM-001,CREM-002,CREM-016,CREM-017,CREM-018,CREM-023,CREM-032,CREM-036,CREM-038,CREM-039,CREM-040,CREM-041,CREM-042,CREM-043,CREM-044,CREM-045,CREM-046,CREM-047,CREM-048,CREM-049,CREM-202,CREM-203,RP11-297A16.2-001,RP11-297A16.2-003,RP11-297A16.2-004	10	35415630	35415788	107.3	0.018	0.014	0.015	0						#-nan	#-nan	#-nan
5S_rRNA	CREM,RP11-297A16.2	CREM,RP11-297A16.2	CREM-001,CREM-002,CREM-016,CREM-017,CREM-018,CREM-023,CREM-032,CREM-036,CREM-038,CREM-039,CREM-040,CREM-041,CREM-042,CREM-043,CREM-044,CREM-045,CREM-046,CREM-047,CREM-048,CREM-049,CREM-202,CREM-203,RP11-297A16.2-001,RP11-297A16.2-003,RP11-297A16.2-004	10	35416222	35416338	75.27	0.018	0.014	0.015	0						#-nan	#-nan	#-nan
5S_rRNA	CREM,RP11-297A16.2	CREM,RP11-297A16.2	CREM-001,CREM-002,CREM-016,CREM-017,CREM-018,CREM-023,CREM-032,CREM-036,CREM-038,CREM-039,CREM-040,CREM-041,CREM-042,CREM-043,CREM-044,CREM-045,CREM-046,CREM-047,CREM-048,CREM-049,CREM-202,CREM-203,RP11-297A16.2-001,RP11-297A16.2-003,RP11-297A16.2-004	10	35415711	35415808	63.18	0.018	0.014	0.015	0						#-nan	#-nan	#-nan
5S_rRNA	CSGALNACT2,RP11-351D16.3	CSGALNACT2,CSGALNACT2-DT	CSGALNACT2-001,CSGALNACT2-201,RP11-351D16.3-001	10	43633892	43634083	129.74	0.021	0	0.005	0	1	rs148684525	0.01	0.02	0.02	-0.44	#-nan	-0.77
5S_rRNA	CSGALNACT2,RP11-351D16.3	CSGALNACT2,CSGALNACT2-DT	CSGALNACT2-001,CSGALNACT2-201,RP11-351D16.3-001	10	43633898	43634108	142.39	0.021	0	0.005	0	1	rs148684525	0.01	0.02	0.02	-0.44	#-nan	-0.77
5S_rRNA	CUL2	CUL2	CUL2-001,CUL2-002,CUL2-006,CUL2-007,CUL2-008,CUL2-201,CUL2-203	10	35379299	35379435	90.45	0.099	0	0.029	0						#-nan	#-nan	#-nan
5S_rRNA	CUL2	CUL2	CUL2-001,CUL2-002,CUL2-006,CUL2-007,CUL2-008,CUL2-201,CUL2-203	10	35379302	35379435	89.24	0.099	0	0.029	0						#-nan	#-nan	#-nan
5S_rRNA	CYP2C8	CYP2C8	CYP2C8-011	10	96801427	96801547	80.8	10	0	0.009	0	1	rs12265954	0.19	0.2	0.19	#-nan	#-nan	-0.45
5S_rRNA	DDX21	DDX21	DDX21-001,DDX21-201(*)	10	70716124	70716245	81.2	0.008	0	0	0						#-nan	#-nan	#-nan
5S_rRNA	DIP2C	DIP2C	DIP2C-001,DIP2C-002	10	735633	735826	133.31	0.023	0.017	0	0.011	1	rs181432514	0.1	0.03	0.06	#-nan	-0.6	0.14
5S_rRNA	DKK1,PRKG1-AS1	DKK1,PRKG1-AS1	DKK1-001,DKK1-002,DKK1-003,DKK1-004,PRKG1-AS1-003	10	54074002	54074089	60.44	0.025	0	0	0	1	rs188534786	0	0	0	#-nan	#-nan	-0.97
5S_rRNA	DLG5,DLG5-AS1	DLG5,DLG5-AS1	DLG5-001,DLG5-201,DLG5-AS1-001	10	79686783	79686949	113.85	0.013	0.006	0	0						#-nan	#-nan	#-nan
5S_rRNA	DLG5,DLG5-AS1	DLG5,DLG5-AS1	DLG5-001,DLG5-201,DLG5-AS1-001	10	79686788	79686969	124.2	0.013	0.006	0	0						#-nan	#-nan	#-nan
5S_rRNA	DNAJC1	DNAJC1	DNAJC1-001,DNAJC1-003,DNAJC1-004,DNAJC1-005	10	22292645	22292772	82.68	0.027	0.021	0.021	0	3	rs183569721,rs188646022,rs139033268	0.03	0.03	0.03	#-nan	-0.83	-0.57
5S_rRNA	DNMBP	DNMBP	DNMBP-001,DNMBP-201	10	101769509	101769871	242.41	0.015	0	0.008	0	1	rs146141430	0.05	0	0.04	-0.44	-0.96	#-nan
5S_rRNA	DNMBP	DNMBP	DNMBP-003	10	101651622	101651898	187.27	10	0	0.015	0	4	rs58351265,rs181633431,rs190427937,rs186358560	0.02	0.04	0.03	-0.72	-1	-0.45
5S_rRNA	DRGX	DRGX	DRGX-001,DRGX-201	10	50603223	50603369	99.14	0.015	0	0.015	0	1	rs149664326	0.01	#-nan	0.01	-0.83	#-nan	#-nan
5S_rRNA	DUSP13,SAMD8	DUSP13B,SAMD8	DUSP13-001,DUSP13-003,DUSP13-005,DUSP13-006,DUSP13-008,DUSP13-010,DUSP13-011,DUSP13-012,DUSP13-013,DUSP13-201,DUSP13-202,SAMD8-001,SAMD8-002,SAMD8-201	10	76871297	76871405	73.03	0.019	0.009	0.009	0.009						#-nan	#-nan	#-nan
5S_rRNA	ECD,FAM149B1	ECD,FAM149B1	ECD-001,ECD-002,ECD-003,ECD-004,ECD-006,ECD-007,ECD-008,FAM149B1-001	10	74927949	74928082	89.24	0	0	0.008	0						#-nan	#-nan	#-nan
5S_rRNA	ECD,FAM149B1	ECD,FAM149B1	ECD-001,ECD-002,ECD-003,ECD-004,ECD-006,ECD-007,ECD-008,FAM149B1-001	10	74927970	74928169	132.66	0	0	0.008	0						#-nan	#-nan	#-nan
5S_rRNA	ECHDC3	ECHDC3	ECHDC3-001,ECHDC3-002,ECHDC3-004	10	11784296	11784388	60.59	0.038	0.011	0.011	0	1	.	0	0	0	-0.7	-0.54	-0.7
5S_rRNA	EGR2	EGR2	EGR2-001,EGR2-201,EGR2-202	10	64578623	64578713	63.42	0	0	0	0						#-nan	#-nan	#-nan
5S_rRNA	ENKUR,THNSL1	ENKUR,THNSL1	ENKUR-001,ENKUR-002,ENKUR-003,ENKUR-004,THNSL1-001,THNSL1-002	10	25305900	25305997	65.12	0.037	0.011	0.036	0.011	4	rs7082131,rs76554366,rs188669257,rs111832741	0.19	0.05	0.1	0.12	1.95	0.82
5S_rRNA	ENKUR,THNSL1	ENKUR,THNSL1	ENKUR-001,ENKUR-002,ENKUR-003,ENKUR-004,THNSL1-001,THNSL1-002	10	25305547	25305664	79.97	0.037	0.011	0.036	0.011	3	rs115938923,rs76021461,rs116453055	0.06	0.07	0.06	-0.9	#-nan	-0.49
5S_rRNA	ERLIN1	ERLIN1	ERLIN1-002,ERLIN1-003	10	101945736	101945847	72.86	0.019	0.009	0.009	0.009	1	rs184354650	#-nan	0	0	#-nan	-0.96	#-nan
5S_rRNA	EXOC6	EXOC6	EXOC6-001,EXOC6-003,EXOC6-203	10	94608593	94608703	73.57	0	0	0.009	0						#-nan	#-nan	#-nan
5S_rRNA	EXOSC1,ZDHHC16	EXOSC1,ZDHHC16	EXOSC1-001,EXOSC1-003,EXOSC1-004,EXOSC1-005,EXOSC1-006,EXOSC1-008,EXOSC1-009,EXOSC1-010,EXOSC1-011,EXOSC1-012,EXOSC1-013,ZDHHC16-003,ZDHHC16-004,ZDHHC16-005,ZDHHC16-006,ZDHHC16-007,ZDHHC16-009,ZDHHC16-011,ZDHHC16-012,ZDHHC16-013,ZDHHC16-014,ZDHHC16-201	10	99205949	99206044	64.46	0.022	0	0	0						#-nan	#-nan	#-nan
5S_rRNA	FAM107B	FAM107B	FAM107B-003,FAM107B-004,FAM107B-006,FAM107B-029	10	14646002	14646152	103.91	0.03	0.007	0.014	0	2	rs11259216,rs11259215	0	0.28	0.23	0.53	1.94	0.65
5S_rRNA	FAM13C	FAM13C	FAM13C-001,FAM13C-002,FAM13C-003,FAM13C-004,FAM13C-005,FAM13C-006,FAM13C-007,FAM13C-008,FAM13C-009,FAM13C-010,FAM13C-011,FAM13C-014,FAM13C-201	10	61122380	61122500	78.8	0	0	0.018	0						#-nan	#-nan	#-nan
5S_rRNA	FAM171A1	FAM171A1	FAM171A1-001,FAM171A1-002	10	15412591	15412864	182.51	0	0	0.004	0						#-nan	#-nan	#-nan
5S_rRNA	FAM178A,RP11-179B2.2	SLF2,RP11-179B2.2	FAM178A-001,FAM178A-002,FAM178A-003,FAM178A-005,RP11-179B2.2-001	10	102672876	102672972	61.82	0.067	0.011	0.023	0.011	1	rs199543953	#-nan	0	0	#-nan	0.2	#-nan
5S_rRNA	FAM178A	SLF2	FAM178A-004	10	102700474	102700573	63.96	0.071	0	0.023	0	3	rs141359671,.,rs140077078	0.13	0.02	0.13	1.27	0.91	1.5
5S_rRNA	FAM208B	TASOR2	FAM208B-003,FAM208B-006,FAM208B-007,FAM208B-008,FAM208B-010	10	5726919	5727171	171.77	0.008	0	0.008	0	1	rs187700319	0.03	0.03	0.03	#-nan	#-nan	-0.64
5S_rRNA	FAM208B	TASOR2	FAM208B-011	10	5734775	5734869	64.06	0.036	0	0.011	0	2	rs117638247,rs2386621	0	0.05	0.03	-0.9	-0.31	#-nan
5S_rRNA	FAM213A	PRXL2A	FAM213A-001,FAM213A-002,FAM213A-003	10	82168185	82168324	94.66	0.007	0	0	0						#-nan	#-nan	#-nan
5S_rRNA	FAM213A	PRXL2A	FAM213A-001,FAM213A-002,FAM213A-003,FAM213A-202(*)	10	82168186	82168324	94.25	0.007	0	0	0						#-nan	#-nan	#-nan
5S_rRNA	FAM21A	WASHC2A	FAM21A-001,FAM21A-003,FAM21A-005,FAM21A-201,FAM21A-202,FAM21A-204(*)	10	51827710	51827816	70.35	0.083	0	0.03	0	3	rs4935425,.,rs114923840	0.12	0.48	0.33	1.16	1.74	-0.73
5S_rRNA	FAM21A	WASHC2A	FAM21A-001,FAM21A-003,FAM21A-005,FAM21A-201,FAM21A-202	10	51827910	51828011	69.55	0.083	0	0.03	0	1	rs55875820	0.4	0.29	0.22	1.9	1.67	-0.83
5S_rRNA	FAM21C	WASHC2C	FAM21C-001,FAM21C-004,FAM21C-201,FAM21C-202,FAM21C-203,FAM21C-204,FAM21C-006(*)	10	46222906	46223010	71.62	0	0	0	0						#-nan	#-nan	#-nan
5S_rRNA	FAM25C	FAM25C	FAM25C-001,FAM25C-002	10	49207649	49207761	73.26	0	0	0	0						#-nan	#-nan	#-nan
5S_rRNA	FAM35A,GLUD1	SHLD2,GLUD1	FAM35A-001,FAM35A-002,FAM35A-003,GLUD1-001,GLUD1-201,GLUD1-202	10	88854898	88854995	65.12	0.011	0.036	0.022	0.023						#-nan	#-nan	#-nan
5S_rRNA	FAM35A,GLUD1	SHLD2,GLUD1	FAM35A-001,FAM35A-002,FAM35A-003,GLUD1-001,GLUD1-201,GLUD1-202	10	88854942	88855172	153.97	0.011	0.036	0.022	0.023	1	rs184717376	0.07	0.07	0.07	#-nan	#-nan	-0.2
5S_rRNA	FBXW4	FBXW4	FBXW4-001,FBXW4-002	10	103454797	103455008	147	0.005	0	0	0						#-nan	#-nan	#-nan
5S_rRNA	FGFBP3,RP11-402D21.2	FGFBP3,RP11-402D21.2	FGFBP3-001,RP11-402D21.2-001	10	93668189	93668292	69.36	0	0	0.011	0						#-nan	#-nan	#-nan
5S_rRNA	FGFBP3,RP11-402D21.2	FGFBP3,RP11-402D21.2	FGFBP3-001,RP11-402D21.2-001	10	93668188	93668285	68.04	0	0	0.011	0						#-nan	#-nan	#-nan
5S_rRNA	FRAT2,RP11-452K12.4	FRAT2,RP11-452K12.4	FRAT2-001,RP11-452K12.4-001	10	99093898	99093988	62.51	0.029	0	0	0						#-nan	#-nan	#-nan
5S_rRNA	FRAT2,RP11-452K12.4	FRAT2,RP11-452K12.4	FRAT2-001,RP11-452K12.4-001	10	99093898	99094009	75.07	0.029	0	0	0						#-nan	#-nan	#-nan
5S_rRNA	FRMD4A	FRMD4A	FRMD4A-010,FRMD4A-011	10	13699053	13699176	79.1	0.008	0	0.008	0						#-nan	#-nan	#-nan
5S_rRNA	FZD8	FZD8	FZD8-001	10	35929743	35929851	75.18	0.014	0	0	0						#-nan	#-nan	#-nan
5S_rRNA	GATA3,GATA3-AS1,RP11-379F12.4	GATA3,GATA3-AS1,RP11-379F12.4	GATA3-001,GATA3-002,GATA3-003,GATA3-AS1-002,GATA3-AS1-003,RP11-379F12.4-001	10	8093820	8093923	70.18	0	0	0	0						#-nan	#-nan	#-nan
5S_rRNA	GDF10	GDF10	GDF10-001	10	48439099	48439282	126.68	0.024	0	0.006	0	1	rs74444473	0	0.02	0.01	-0.56	0.05	-0.51
5S_rRNA	GDI2,RP11-318E3.9	GDI2,RP11-318E3.9	GDI2-001,GDI2-002,GDI2-004,GDI2-005,GDI2-008,GDI2-009,GDI2-201,RP11-318E3.9-001	10	5855744	5855838	61.38	0	0.021	0.021	0	1	rs150105369	0	0.02	0.01	-0.7	#-nan	-0.77
5S_rRNA	GHITM,RP11-338I21.1	GHITM,RP11-338I21.1	GHITM-001,RP11-338I21.1-001	10	85899345	85899447	68.95	0	0	0.01	0	1	rs1136944	0.31	0.36	0.33	-0.83	#-nan	1.7
5S_rRNA	GHITM,RP11-338I21.1	GHITM,RP11-338I21.1	GHITM-001,RP11-338I21.1-001,GHITM-201(*)	10	85899328	85899442	77.93	0	0	0.01	0	1	rs1136944	0.31	0.36	0.33	-0.83	#-nan	1.7
5S_rRNA	GOLGA7B,LINC00866	GOLGA7B,GOLGA7B-DT	GOLGA7B-001,LINC00866-001	10	99609829	99610044	146.06	0.01	0	0.009	0.005	2	rs148818830,rs190531660	0.02	0	0.01	-0.7	-0.96	-0.9
5S_rRNA	GRID1	GRID1	GRID1-001,GRID1-002	10	88125860	88125956	67.73	0.011	0.011	0.051	0	3	rs61856637,rs10887587,rs34731943	0.27	0.06	0.14	2.21	2.21	1.08
5S_rRNA	GRID1	GRID1	GRID1-001,GRID1-002	10	88126459	88126706	168.1	0.011	0.011	0.051	0	1	rs193214481	#-nan	0.02	0.02	#-nan	-0.71	#-nan
5S_rRNA	H2AFY2	MACROH2A2	H2AFY2-001,H2AFY2-002	10	71813132	71813238	72.22	0.01	0	0.01	0						#-nan	#-nan	#-nan
5S_rRNA	HECTD2	HECTD2	HECTD2-001,HECTD2-005,HECTD2-201	10	93169903	93170081	118.59	0.012	0.021	0.021	0	2	rs7081363,rs145070400	0.45	0.39	0.37	-0.89	-0.35	1.99
5S_rRNA	HERC4	HERC4	HERC4-001,HERC4-006,HERC4-008,HERC4-009,HERC4-010,HERC4-011,HERC4-012,HERC4-013,HERC4-014,HERC4-015,HERC4-016,HERC4-201	10	69834547	69834643	65.69	0.028	0	0.02	0.009						#-nan	#-nan	#-nan
5S_rRNA	HERC4	HERC4	HERC4-001,HERC4-006,HERC4-008,HERC4-009,HERC4-010,HERC4-011,HERC4-012,HERC4-013,HERC4-014,HERC4-015,HERC4-016,HERC4-201	10	69834746	69834855	69.12	0.028	0	0.02	0.009	2	rs80117551,rs117107570	0	0.3	0.29	-0.97	1.54	#-nan
5S_rRNA	HPS1	HPS1	HPS1-002,HPS1-003,HPS1-007,HPS1-008,HPS1-009,HPS1-010,HPS1-011,HPS1-012,HPS1-201(*)	10	100206619	100206731	75.48	0.041	0	0	0						#-nan	#-nan	#-nan
5S_rRNA	HPS6	HPS6	HPS6-001	10	103825412	103825555	99.96	0	0	0.015	0	1	rs142777642	0	0	0	#-nan	#-nan	-0.97
5S_rRNA	HTR7	HTR7	HTR7-001,HTR7-002,HTR7-003,HTR7-201	10	92617832	92617973	94.87	0.015	0.007	0	0.007						#-nan	#-nan	#-nan
5S_rRNA	IDE	IDE	IDE-001,IDE-002	10	94333992	94334118	84.02	0	0	0	0						#-nan	#-nan	#-nan
5S_rRNA	IDI1,WDR37	IDI1,WDR37	IDI1-001,IDI1-002,IDI1-003,IDI1-004,IDI1-005,WDR37-001	10	1094812	1094913	69.55	0.076	0	0.021	0	2	rs7091756,rs4880760	0.03	#-nan	0.03	-1.03	#-nan	#-nan
5S_rRNA	IFIT5,LIPA	IFIT5,LIPA	IFIT5-001,IFIT5-201,LIPA-004	10	91174432	91174527	63.52	0.075	0	0.023	0	1	rs141335028	0.02	0.03	0.02	#-nan	#-nan	-0.7
5S_rRNA	IL15RA	IL15RA	IL15RA-001,IL15RA-002,IL15RA-003,IL15RA-004,IL15RA-005,IL15RA-006,IL15RA-007,IL15RA-010,IL15RA-012,IL15RA-013,IL15RA-014,IL15RA-016,IL15RA-019,IL15RA-201,IL15RA-202,IL15RA-203	10	6019380	6019511	90.25	0.009	0	0.02	0						#-nan	#-nan	#-nan
5S_rRNA	IL15RA	IL15RA	IL15RA-001,IL15RA-002,IL15RA-003,IL15RA-004,IL15RA-005,IL15RA-006,IL15RA-007,IL15RA-010,IL15RA-012,IL15RA-013,IL15RA-014,IL15RA-016,IL15RA-019,IL15RA-201,IL15RA-202,IL15RA-203	10	6019977	6020086	73.16	0.009	0	0.02	0	1	rs4749859	0.04	0.26	0.18	-0.07	1.56	-0.83
5S_rRNA	IL15RA	IL15RA	IL15RA-001,IL15RA-002,IL15RA-003,IL15RA-004,IL15RA-005,IL15RA-006,IL15RA-007,IL15RA-010,IL15RA-012,IL15RA-013,IL15RA-014,IL15RA-016,IL15RA-019,IL15RA-201,IL15RA-202,IL15RA-203,IL15RA-204(*),IL15RA-205(*),IL15RA-206(*),IL15RA-207(*)	10	6019372	6019477	74.98	0.009	0	0.02	0						#-nan	#-nan	#-nan
5S_rRNA	ITGA8	ITGA8	ITGA8-001	10	15761927	15762059	88.84	0.016	0	0	0						#-nan	#-nan	#-nan
5S_rRNA	ITGA8	ITGA8	ITGA8-003	10	15689480	15689591	73.66	10	0	0	0						#-nan	#-nan	#-nan
5S_rRNA	ITGB1,RP11-462L8.1	ITGB1,ITGB1-DT	ITGB1-001,ITGB1-002,ITGB1-003,ITGB1-004,ITGB1-006,ITGB1-009,ITGB1-010,ITGB1-011,ITGB1-201,ITGB1-202,RP11-462L8.1-001	10	33246505	33246614	72.36	0.017	0	0.005	0						#-nan	#-nan	#-nan
5S_rRNA	ITGB1,RP11-462L8.1	ITGB1,ITGB1-DT	ITGB1-001,ITGB1-002,ITGB1-003,ITGB1-004,ITGB1-006,ITGB1-009,ITGB1-010,ITGB1-011,ITGB1-201,ITGB1-202,RP11-462L8.1-001	10	33247070	33247257	126.48	0.017	0	0.005	0	1	.	0	0.05	0.04	-0.01	#-nan	-0.38
5S_rRNA	ITGB1	ITGB1	ITGB1-012	10	33296968	33297117	96.72	10	0.048	0.087	0	5	.,.,.,.,.	0.05	0.03	0.05	-0.97	0.88	0.04
5S_rRNA	ITIH5	ITIH5	ITIH5-001,ITIH5-201,ITIH5-202,ITIH5-203	10	7708977	7709191	143.51	0.067	0.01	0.02	0	1	.	0.05	0	0.04	0.32	-0.6	-0.57
5S_rRNA	ITIH5	ITIH5	ITIH5-002	10	7683613	7683707	60.29	0.205	0.022	0.065	0	2	.,.	0.06	0.03	0.04	0.71	1.58	0.88
5S_rRNA	JMJD1C,JMJD1C-AS1	JMJD1C,JMJD1C-AS1	JMJD1C-001,JMJD1C-201,JMJD1C-AS1-001	10	65225738	65225873	91.39	0.007	0	0	0						#-nan	#-nan	#-nan
5S_rRNA	JMJD1C,JMJD1C-AS1	JMJD1C,JMJD1C-AS1	JMJD1C-001,JMJD1C-201,JMJD1C-AS1-001	10	65225724	65225869	98.74	0.007	0	0	0						#-nan	#-nan	#-nan
5S_rRNA	KAT6B,RP11-222G7.2	KAT6B,RP11-222G7.2	KAT6B-001,KAT6B-002,KAT6B-003,KAT6B-006,KAT6B-007,RP11-222G7.2-001	10	76585075	76585201	86.53	0.006	0	0	0						#-nan	#-nan	#-nan
5S_rRNA	KAT6B,RP11-222G7.2	KAT6B,RP11-222G7.2	KAT6B-001,KAT6B-002,KAT6B-003,KAT6B-006,KAT6B-007,RP11-222G7.2-001	10	76585034	76585202	114.65	0.006	0	0	0						#-nan	#-nan	#-nan
5S_rRNA	KCNIP2	KCNIP2	KCNIP2-001,KCNIP2-002,KCNIP2-004,KCNIP2-006,KCNIP2-009,KCNIP2-011,KCNIP2-013,KCNIP2-014,KCNIP2-201	10	103603549	103603652	68.11	0.026	0	0.022	0	2	.,.	0.01	#-nan	0.02	-1.17	#-nan	#-nan
5S_rRNA	KCNMA1	KCNMA1	KCNMA1-001,KCNMA1-002,KCNMA1-003,KCNMA1-004,KCNMA1-005,KCNMA1-006,KCNMA1-007,KCNMA1-008,KCNMA1-009,KCNMA1-010,KCNMA1-014,KCNMA1-015,KCNMA1-201,KCNMA1-202,KCNMA1-203	10	79397946	79398038	64.26	0.008	0	0.016	0						#-nan	#-nan	#-nan
5S_rRNA	KCNMA1	KCNMA1	KCNMA1-001,KCNMA1-002,KCNMA1-003,KCNMA1-004,KCNMA1-005,KCNMA1-006,KCNMA1-007,KCNMA1-008,KCNMA1-009,KCNMA1-010,KCNMA1-014,KCNMA1-015,KCNMA1-201,KCNMA1-202,KCNMA1-203	10	79397648	79397798	103.91	0.008	0	0.016	0	1	rs2720006	0.02	0.1	0.11	1.94	0.77	1.83
5S_rRNA	KCNMA1	KCNMA1	KCNMA1-001,KCNMA1-002,KCNMA1-003,KCNMA1-004,KCNMA1-005,KCNMA1-006,KCNMA1-007,KCNMA1-008,KCNMA1-009,KCNMA1-010,KCNMA1-014,KCNMA1-015,KCNMA1-201,KCNMA1-202,KCNMA1-203	10	79397656	79397788	91.49	0.008	0	0.016	0	1	rs2720006	0.02	0.1	0.11	1.94	0.77	1.83
5S_rRNA	KCNMA1	KCNMA1	KCNMA1-001,KCNMA1-002,KCNMA1-003,KCNMA1-004,KCNMA1-005,KCNMA1-006,KCNMA1-007,KCNMA1-008,KCNMA1-009,KCNMA1-010,KCNMA1-014,KCNMA1-015,KCNMA1-201,KCNMA1-202,KCNMA1-203,KCNMA1-204(*)	10	79398325	79398460	90.05	0.008	0	0.016	0	1	rs200540416	0.03	0.03	0.03	#-nan	#-nan	-0.86
5S_rRNA	KIAA1217	KIAA1217	KIAA1217-004,KIAA1217-005,KIAA1217-201,KIAA1217-203,KIAA1217-202(*)	10	24497799	24497904	70.75	0.01	0.01	0.01	0.01						#-nan	#-nan	#-nan
5S_rRNA	KIAA1279	KIFBP	KIAA1279-001	10	70748710	70748851	95.47	0	0	0.023	0	1	rs2255607	0.02	0	0.01	1.89	1.69	1.56
5S_rRNA	KIAA1462	JCAD	KIAA1462-002	10	30348070	30348229	110.12	0	0.006	0.013	0.006	1	rs184712844	#-nan	0	0	#-nan	-0.96	#-nan
5S_rRNA	KIF5B,Y_RNA.429	KIF5B,Y_RNA.429	KIF5B-001,Y_RNA.429-201	10	32345303	32345441	93.43	0.033	0	0.007	0	1	rs12251445	0	0.02	0.01	1.43	1.86	1.48
5S_rRNA	KLF6	KLF6	KLF6-001,KLF6-002,KLF6-003,KLF6-201	10	3827756	3827872	78.74	0.009	0.009	0.018	0	1	rs12253538	0.01	0.01	0	0.66	0.61	0.08
5S_rRNA	KLLN,PTEN	KLLN,PTEN	KLLN-001,PTEN-001,PTEN-002,PTEN-003	10	89623659	89623755	64.87	0	0.021	0.021	0	1	rs12573787	0.1	0.28	0.17	0.57	1.69	-0.77
5S_rRNA	LARP4B,RP11-363N22.2	LARP4B,LARP4B-DT	LARP4B-003,LARP4B-005,LARP4B-006,RP11-363N22.2-001	10	977811	977907	65.69	0.009	0.009	0.009	0.009						#-nan	#-nan	#-nan
5S_rRNA	LARP4B,RP11-363N22.2	LARP4B,LARP4B-DT	LARP4B-003,LARP4B-005,LARP4B-006,RP11-363N22.2-001,LARP4B-201(*)	10	977259	977370	78.12	0.009	0.009	0.009	0.009						#-nan	#-nan	#-nan
5S_rRNA	LCOR	LCOR	LCOR-009,LCOR-010,LCOR-015,LCOR-201	10	98592275	98592372	67.07	0.033	0.007	0.007	0.007						#-nan	#-nan	#-nan
5S_rRNA	LCOR	LCOR	LCOR-009,LCOR-010,LCOR-015,LCOR-201	10	98592570	98592715	96.48	0.033	0.007	0.007	0.007	1	rs142380609	0.05	0.06	0.05	#-nan	#-nan	1.09
5S_rRNA	LDB1	LDB1	LDB1-003,LDB1-201	10	103879942	103880072	89.01	0	0	0.008	0	1	rs137885916	0.06	0.17	0.1	-0.5	#-nan	0.59
5S_rRNA	LINC00700	LINC00700	LINC00700-001,LINC00700-002,LINC00700-003	10	2057280	2057505	148.1	0.079	0.029	0.039	0	3	.,.,rs10903628	0.2	0.02	0.15	2.74	-0.49	#-nan
5S_rRNA	LINC00707	LINC00707	LINC00707-001	10	6820692	6820797	71.81	0	0	0.02	0	1	rs200321943	0	0.02	0.01	-0.13	-0.96	-0.57
5S_rRNA	LINC00709	LINC00709	LINC00709-001	10	9315100	9315383	191.76	0.077	0.011	0.019	0	4	rs75943801,rs191464902,.,rs77688632	0.1	0.02	0.05	1.25	1.14	1.06
5S_rRNA	LINC00839	LINC00839	LINC00839-001,LINC00839-002	10	42971316	42971476	112.14	0.013	0.006	0.02	0.006	3	rs1760687,rs181488587,rs575751588;rs190039406	0.27	0.15	0.14	1.87	0.86	1.09
5S_rRNA	LINC00843,PARG	TIMM23B-AGAP6,PARG	LINC00843-001,LINC00843-002,PARG-001(*)	10	51730375	51730502	85.68	0	0	0.008	0	1	rs7896643	0.24	0	0.22	1.43	-0.71	-0.77
5S_rRNA	LINC00863,NUTM2A-AS1	LINC00863,NUTM2A-AS1	LINC00863-001,NUTM2A-AS1-002,NUTM2A-AS1-004,NUTM2A-AS1-006,NUTM2A-AS1-008,NUTM2A-AS1-012,NUTM2A-AS1-013	10	89101762	89101928	110.55	0.013	0	0	0						#-nan	#-nan	#-nan
5S_rRNA	LINC00863,NUTM2A-AS1	LINC00863,NUTM2A-AS1	LINC00863-001,NUTM2A-AS1-002,NUTM2A-AS1-004,NUTM2A-AS1-006,NUTM2A-AS1-008,NUTM2A-AS1-012,NUTM2A-AS1-013	10	89101763	89101930	111.76	0.013	0	0	0						#-nan	#-nan	#-nan
5S_rRNA	LINC00948	MRLN	LINC00948-004,LINC00948-005	10	61504206	61504315	73.44	0.185	0.019	0.051	0	4	rs61861085,rs186453782,rs1171588,rs1171589	0.14	0.15	0.14	0.14	-0.26	-0.05
5S_rRNA	LINC00993,Y_RNA.780	LINC00993,Y_RNA.780	LINC00993-001,Y_RNA.780-201	10	37594671	37594761	60.7	0	0.023	0.011	0	1	rs186838309	0	#-nan	0	-0.97	#-nan	#-nan
5S_rRNA	LIPA	LIPA	LIPA-001,LIPA-201	10	91011467	91011564	65.12	0.01	0	0	0						#-nan	#-nan	#-nan
5S_rRNA	LOXL4	LOXL4	LOXL4-001	10	100028036	100028238	136.68	0	0	0	0						#-nan	#-nan	#-nan
5S_rRNA	LRRC20	LRRC20	LRRC20-001,LRRC20-002,LRRC20-003,LRRC20-004,LRRC20-005,LRRC20-201,LRRC20-202	10	72142370	72142526	104.12	0.032	0.021	0.021	0	4	rs7907211,rs144784140,rs7921619,rs148645069	0.11	0.09	0.07	0.58	1.85	0.68
5S_rRNA	LZTS2	LZTS2	LZTS2-001,LZTS2-006,LZTS2-008	10	102759501	102759619	81.9	0	0	0	0						#-nan	#-nan	#-nan
5S_rRNA	MAPK8	MAPK8	MAPK8-004,MAPK8-006,MAPK8-008,MAPK8-009,MAPK8-010,MAPK8-202(*)	10	49514625	49514820	132.19	0.028	0	0.005	0	1	rs113540415	0.08	0.01	0.09	0.26	#-nan	-0.83
5S_rRNA	MARCHF8	MARCHF8	MARCHF8-004,MARCHF8-005,MARCHF8-006,MARCHF8-201,MARCHF8-202	10	46089950	46090161	145.73	0.032	0.005	0.015	0						#-nan	#-nan	#-nan
5S_rRNA	MASTL,YME1L1	MASTL,YME1L1	MASTL-001,MASTL-003,MASTL-004,YME1L1-001,YME1L1-002,YME1L1-003,YME1L1-004,YME1L1-005,YME1L1-007,YME1L1-201	10	27444317	27444410	60.98	0.023	0.023	0.088	0.023	5	rs7907981,rs7907988,rs7919803,rs199860585,rs200621725	0.01	0.11	0.08	1.73	-0.31	1.3
5S_rRNA	MCM10	MCM10	MCM10-001,MCM10-003,MCM10-004	10	13200478	13200599	81.2	0.027	0.018	0.018	0	1	.	#-nan	0	0	#-nan	-0.96	#-nan
5S_rRNA	MCU	MCU	MCU-001,MCU-002,MCU-004,MCU-005,MCU-006,MCU-007,MCU-201	10	74452469	74452579	73.57	0	0	0	0						#-nan	#-nan	#-nan
5S_rRNA	MEIG1	MEIG1	MEIG1-002,MEIG1-003,MEIG1-201	10	15001501	15001598	65.28	0.01	0	0.01	0						#-nan	#-nan	#-nan
5S_rRNA	MICU1	MICU1	MICU1-002,MICU1-006,MICU1-007,MICU1-010,MICU1-201,MICU1-202	10	74385895	74386004	73.16	0.02	0	0.009	0	1	rs114773351	0.05	0.05	0.05	#-nan	#-nan	-0.45
5S_rRNA	MKX,RP11-360I20.2	MKX,RP11-360I20.2	MKX-001,MKX-002,MKX-003,MKX-201,RP11-360I20.2-001	10	28034600	28034749	101.18	0.007	0	0.007	0	1	rs11006701	0.01	0.17	0.12	0.1	1.51	-0.32
5S_rRNA	MKX,RP11-360I20.2	MKX,RP11-360I20.2	MKX-002,RP11-360I20.2-001	10	28031468	28031607	93.26	0.007	0	0.007	0	1	rs73604055	0.05	0.05	0.05	#-nan	#-nan	-0.45
5S_rRNA	MLLT10	MLLT10	MLLT10-001,MLLT10-002,MLLT10-003,MLLT10-004,MLLT10-005,MLLT10-006,MLLT10-008,MLLT10-010,MLLT10-011,MLLT10-012,MLLT10-013,MLLT10-201,MLLT10-202	10	21822892	21823046	106.4	0.008	0	0.008	0						#-nan	#-nan	#-nan
5S_rRNA	MLLT10	MLLT10	MLLT10-001,MLLT10-002,MLLT10-003,MLLT10-004,MLLT10-005,MLLT10-006,MLLT10-008,MLLT10-010,MLLT10-011,MLLT10-012,MLLT10-013,MLLT10-201,MLLT10-202	10	21822920	21823053	91.91	0.008	0	0.008	0						#-nan	#-nan	#-nan
5S_rRNA	MMS19,UBTD1	MMS19,UBTD1	MMS19-003,MMS19-004,MMS19-005,MMS19-006,MMS19-007,MMS19-008,MMS19-009,MMS19-010,MMS19-012,MMS19-013,MMS19-018,MMS19-201,MMS19-202,UBTD1-001	10	99258102	99258211	74.26	0.044	0	0.009	0	1	rs201996306	#-nan	0	0	#-nan	1.19	#-nan
5S_rRNA	MRPS16,RP11-152N13.5	MRPS16,RP11-152N13.5	MRPS16-001,MRPS16-002,MRPS16-003,MRPS16-004,MRPS16-005,MRPS16-201,RP11-152N13.5-001,RP11-152N13.5-002,RP11-152N13.5-003	10	75012155	75012269	75.64	0.019	0	0.019	0	1	rs2271909	#-nan	0.02	0.02	#-nan	-0.71	#-nan
5S_rRNA	MSRB2	MSRB2	MSRB2-001	10	23384259	23384472	142.31	0.01	0	0.005	0						#-nan	#-nan	#-nan
5S_rRNA	MYO3A,RP11-435M3.2	MYO3A,RP11-435M3.2	MYO3A-001,MYO3A-003,MYO3A-201,RP11-435M3.2-001	10	26223132	26223270	92.06	0.031	0.021	0.021	0	3	rs7073084,rs188597967,rs7073224	0	0.11	0.06	0.21	#-nan	0.05
5S_rRNA	NCOA4	NCOA4	NCOA4-002,NCOA4-003,NCOA4-004	10	51572491	51572597	72.45	0	0	0	0						#-nan	#-nan	#-nan
5S_rRNA	NEBL,NEBL-AS1	NEBL,NEBL-AS1	NEBL-003,NEBL-006,NEBL-008,NEBL-AS1-001,NEBL-AS1-002	10	21463255	21463352	67.07	0.022	0	0.02	0						#-nan	#-nan	#-nan
5S_rRNA	NEBL,NEBL-AS1	NEBL,NEBL-AS1	NEBL-003,NEBL-006,NEBL-008,NEBL-AS1-001,NEBL-AS1-002	10	21462849	21463050	136.27	0.022	0	0.02	0	1	rs113394390	0.18	0.19	0.18	#-nan	#-nan	0.77
5S_rRNA	NEBL,NEBL-AS1	NEBL,NEBL-AS1	NEBL-003,NEBL-006,NEBL-008,NEBL-AS1-001,NEBL-AS1-002	10	21463492	21463646	99.45	0.022	0	0.02	0	3	rs113647668,rs117347142,rs117006349	0.14	0.16	0.13	-0.69	-0.9	-0.03
5S_rRNA	NEBL,NEBL-AS1	NEBL,NEBL-AS1	NEBL-003,NEBL-006,NEBL-008,NEBL-AS1-001,NEBL-AS1-002	10	21462884	21463059	120.06	0.022	0	0.02	0						#-nan	#-nan	#-nan
5S_rRNA	NET1	NET1	NET1-001,NET1-003,NET1-006	10	5488532	5488631	65.93	0.032	0.021	0.021	0	2	rs114007185,rs7090012	0.02	0.01	0.01	1.05	0.69	0.18
5S_rRNA	NET1	NET1	NET1-005,NET1-201	10	5454612	5454790	119.39	0.012	0	0	0						#-nan	#-nan	#-nan
5S_rRNA	NMT2	NMT2	NMT2-001,NMT2-002,NMT2-201	10	15210638	15210813	117.38	0.045	0	0.006	0						#-nan	#-nan	#-nan
5S_rRNA	NOC3L	NOC3L	NOC3L-001,NOC3L-002,NOC3L-003,NOC3L-201	10	96122780	96122874	62.31	0.036	0.011	0.036	0	3	rs7100870,rs7101207,rs141151123	0	0.11	0.07	0.66	-0.83	0.2
5S_rRNA	NPFFR1	NPFFR1	NPFFR1-001	10	72043675	72043825	101.59	0	0	0	0						#-nan	#-nan	#-nan
5S_rRNA	NRG3	NRG3	NRG3-001,NRG3-002,NRG3-003,NRG3-004,NRG3-005,NRG3-006,NRG3-007	10	83634596	83634771	118.32	0.012	0	0	0						#-nan	#-nan	#-nan
5S_rRNA	NRG3	NRG3	NRG3-001,NRG3-002,NRG3-003,NRG3-004,NRG3-005,NRG3-006,NRG3-007	10	83634915	83635013	67.48	0.012	0	0	0						#-nan	#-nan	#-nan
5S_rRNA	NRP1	NRP1	NRP1-001,NRP1-002,NRP1-003,NRP1-004,NRP1-005,NRP1-006,NRP1-201,NRP1-202,NRP1-203	10	33624039	33624181	98.12	0.023	0	0.015	0	2	rs61758232,rs61758231	0.07	0.12	0.06	0.16	0.69	-1.08
5S_rRNA	NRP1	NRP1	NRP1-001,NRP1-002,NRP1-003,NRP1-004,NRP1-005,NRP1-006,NRP1-201,NRP1-202,NRP1-203	10	33625594	33625714	82.01	0.023	0	0.015	0	1	rs190467520	#-nan	0	0	#-nan	-0.9	#-nan
5S_rRNA	NSUN6	NSUN6	NSUN6-002	10	18843176	18843314	98.41	0.015	0.021	0.021	0	1	rs111208087	0.06	0.06	0.06	#-nan	#-nan	-0.32
5S_rRNA	OGDHL	OGDHL	OGDHL-001,OGDHL-201,OGDHL-202	10	50969954	50970153	128.7	0.01	0	0	0						#-nan	#-nan	#-nan
5S_rRNA	PANK1,RP11-80H5.2	PANK1,PANK1-AS1	PANK1-001,PANK1-002,PANK1-003,PANK1-201,PANK1-202,RP11-80H5.2-001,RP11-80H5.2-002	10	91404801	91404926	82.37	0.017	0.021	0.021	0	3	rs12769113,rs76972886,rs139989175	0.12	0.11	0.08	0.22	0.77	0.75
5S_rRNA	PANK1,RP11-80H5.2	PANK1,PANK1-AS1	PANK1-001,PANK1-002,PANK1-003,PANK1-201,PANK1-202,RP11-80H5.2-001,RP11-80H5.2-002	10	91404293	91404485	130.97	0.017	0.021	0.021	0	1	rs11185826	0.12	0.11	0.08	1.16	1.23	1.95
5S_rRNA	PANK1,RP11-80H5.2	PANK1,PANK1-AS1	PANK1-001,PANK1-002,PANK1-003,PANK1-201,PANK1-202,RP11-80H5.2-001,RP11-80H5.2-002	10	91404277	91404481	137.08	0.017	0.021	0.021	0	1	rs11185826	0.12	0.11	0.08	1.16	1.23	1.95
5S_rRNA	PAPSS2,RP11-57C13.3	PAPSS2,RP11-57C13.3	PAPSS2-001,PAPSS2-002,PAPSS2-003,PAPSS2-201,PAPSS2-202,RP11-57C13.3-001	10	89419397	89419483	60.06	0.024	0	0	0						#-nan	#-nan	#-nan
5S_rRNA	PARD3,PARD3-AS1	PARD3,PARD3-DT	PARD3-001,PARD3-002,PARD3-003,PARD3-004,PARD3-005,PARD3-006,PARD3-009,PARD3-010,PARD3-201,PARD3-203,PARD3-204,PARD3-AS1-001	10	35104262	35104505	163.21	0.014	0.004	0.008	0.008	1	rs188663328	0.01	0	0.01	-0.44	-0.9	-0.77
5S_rRNA	PARD3,PARD3-AS1	PARD3,PARD3-DT	PARD3-001,PARD3-002,PARD3-003,PARD3-004,PARD3-005,PARD3-006,PARD3-009,PARD3-010,PARD3-201,PARD3-203,PARD3-204,PARD3-AS1-001	10	35104264	35104516	168.44	0.014	0.004	0.008	0.008	1	rs188663328	0.01	0	0.01	-0.44	-0.9	-0.77
5S_rRNA	PARD3,PARD3-AS1	PARD3,PARD3-DT	PARD3-001,PARD3-002,PARD3-003,PARD3-004,PARD3-005,PARD3-006,PARD3-009,PARD3-010,PARD3-201,PARD3-203,PARD3-204,PARD3-AS1-001	10	35104252	35104503	170.54	0.014	0.004	0.008	0.008	1	rs188663328	0.01	0	0.01	-0.44	-0.9	-0.77
5S_rRNA	PAX2	PAX2	PAX2-001,PAX2-002,PAX2-003,PAX2-004,PAX2-006,PAX2-007,PAX2-201,PAX2-202	10	102502559	102502692	87.12	0.024	0.021	0.021	0	1	rs4917908	0.01	0.26	0.14	0.93	-0.9	1.39
5S_rRNA	PAX2	PAX2	PAX2-001,PAX2-002,PAX2-003,PAX2-004,PAX2-006,PAX2-007,PAX2-201,PAX2-202	10	102502554	102502670	75.27	0.024	0.021	0.021	0						#-nan	#-nan	#-nan
5S_rRNA	PCBD1	PCBD1	PCBD1-001,PCBD1-002,PCBD1-003	10	72648239	72648353	77.93	0.009	0	0.009	0	1	rs827237	0.1	0	0.08	1.05	-0.37	-0.32
5S_rRNA	PCDH15	PCDH15	PCDH15-019,PCDH15-025(*)	10	57386730	57386826	64.87	0	0	0	0						#-nan	#-nan	#-nan
5S_rRNA	PCGF5	PCGF5	PCGF5-001,PCGF5-002,PCGF5-003,PCGF5-201,PCGF5-202	10	92980724	92980889	111.79	0.324	0	0.006	0	1	rs73310474	0.11	0.02	0.11	-0.7	1.41	0.73
5S_rRNA	PCGF5	PCGF5	PCGF5-202(*)	10	92922605	92922770	112.61	0	0	0	0						#-nan	#-nan	#-nan
5S_rRNA	PDLIM1	PDLIM1	PDLIM1-001,PDLIM1-002	10	97050842	97051039	131.86	0.022	0	0.005	0	1	rs149224397	0.01	0.06	0.03	#-nan	#-nan	#-nan
5S_rRNA	PFKFB3	PFKFB3	PFKFB3-001,PFKFB3-202,PFKFB3-203	10	6186673	6186764	61.2	0.012	0	0.012	0						#-nan	#-nan	#-nan
5S_rRNA	PFKP,RP11-118K6.3	PFKP,PFKP-DT	PFKP-002,PFKP-003,PFKP-004,PFKP-005,PFKP-006,PFKP-012,RP11-118K6.3-001	10	3109477	3109630	97.54	0.016	0.007	0.015	0.007						#-nan	#-nan	#-nan
5S_rRNA	PFKP,RP11-118K6.3	PFKP,PFKP-DT	PFKP-002,PFKP-004,PFKP-005,PFKP-006,RP11-118K6.3-001	10	3111218	3111360	101.52	0.016	0.007	0.015	0.007	2	rs147808749,rs112814475	0.04	0.09	0.05	-0.42	-0.48	0.77
5S_rRNA	PFKP,RP11-118K6.3	PFKP,PFKP-DT	PFKP-002,PFKP-004,PFKP-005,PFKP-006,RP11-118K6.3-001	10	3111218	3111356	99.79	0.016	0.007	0.015	0.007	2	rs147808749,rs112814475	0.04	0.09	0.05	-0.42	-0.48	0.77
5S_rRNA	PHYHIPL	PHYHIPL	PHYHIPL-001,PHYHIPL-002,PHYHIPL-003,PHYHIPL-201	10	60936390	60936517	85.22	0	0	0.008	0	1	rs74912539	0	0	0	#-nan	#-nan	-0.97
5S_rRNA	PIK3AP1	PIK3AP1	PIK3AP1-001	10	98480163	98480259	66.65	0.011	0	0	0						#-nan	#-nan	#-nan
5S_rRNA	PIP4K2A	PIP4K2A	PIP4K2A-001,PIP4K2A-005	10	23003299	23003562	181.33	0.016	0	0.004	0						#-nan	#-nan	#-nan
5S_rRNA	PITX3	PITX3	PITX3-201	10	103990480	103990569	60.38	0	0	0	0						#-nan	#-nan	#-nan
5S_rRNA	PLAC9	PLAC9	PLAC9-001,PLAC9-002,PLAC9-003	10	81892250	81892347	65.28	0.011	0	0.022	0	2	rs2257025,.	0.38	0.07	0.22	1.82	1.46	0.35
5S_rRNA	PLAU	PLAU	PLAU-001,PLAU-005,PLAU-007,PLAU-201,PLAU-202	10	75670879	75671101	150.55	0.005	0	0.005	0						#-nan	#-nan	#-nan
5S_rRNA	PLXDC2	PLXDC2	PLXDC2-001,PLXDC2-002	10	20104717	20104882	110.15	0.02	0	0	0						#-nan	#-nan	#-nan
5S_rRNA	PPP1R3C	PPP1R3C	PPP1R3C-001	10	93392927	93393108	119.59	0.054	0.012	0.018	0.012	2	rs2242121,rs10881934	0.3	0.31	0.25	1.58	0.49	1.26
5S_rRNA	PPP3CB,RP11-137L10.6	PPP3CB,RP11-137L10.6	PPP3CB-001,PPP3CB-002,PPP3CB-201,PPP3CB-202,PPP3CB-203,PPP3CB-205,RP11-137L10.6-001,RP11-137L10.6-002,RP11-137L10.6-003,RP11-137L10.6-004,RP11-137L10.6-005,RP11-137L10.6-006,RP11-137L10.6-007,RP11-137L10.6-008,RP11-137L10.6-009,RP11-137L10.6-010,RP11-137L10.6-011	10	75255499	75255650	102.82	0.007	0.021	0.021	0						#-nan	#-nan	#-nan
5S_rRNA	PPP3CB,RP11-137L10.6,PPP3CB-AS1	PPP3CB,RP11-137L10.6,PPP3CB-AS1	PPP3CB-001,PPP3CB-002,PPP3CB-201,PPP3CB-202,PPP3CB-203,PPP3CB-205,RP11-137L10.6-001,RP11-137L10.6-002,RP11-137L10.6-003,RP11-137L10.6-004,RP11-137L10.6-005,RP11-137L10.6-006,RP11-137L10.6-007,RP11-137L10.6-008,RP11-137L10.6-009,RP11-137L10.6-010,RP11-137L10.6-011,PPP3CB-AS1-012(*),PPP3CB-AS1-013(*),PPP3CB-AS1-014(*)	10	75255505	75255652	99.55	0.007	0.021	0.021	0						#-nan	#-nan	#-nan
5S_rRNA	PPP3CB,RP11-137L10.6,PPP3CB-AS1	PPP3CB,RP11-137L10.6,PPP3CB-AS1	PPP3CB-001,PPP3CB-002,PPP3CB-201,PPP3CB-202,PPP3CB-203,PPP3CB-205,RP11-137L10.6-001,RP11-137L10.6-002,RP11-137L10.6-003,RP11-137L10.6-004,RP11-137L10.6-005,RP11-137L10.6-006,RP11-137L10.6-007,RP11-137L10.6-008,RP11-137L10.6-009,RP11-137L10.6-010,RP11-137L10.6-011,PPP3CB-AS1-015(*)	10	75255578	75255670	64.26	0.007	0.021	0.021	0						#-nan	#-nan	#-nan
5S_rRNA	PRKCQ,PRKCQ-AS1	PRKCQ,PRKCQ-AS1	PRKCQ-001,PRKCQ-201,PRKCQ-202,PRKCQ-AS1-001,PRKCQ-AS1-002,PRKCQ-AS1-003,PRKCQ-AS1-004,PRKCQ-AS1-012,PRKCQ-AS1-013,PRKCQ-AS1-007(*),PRKCQ-AS1-017(*)	10	6622286	6622430	99.77	0.015	0.007	0	0						#-nan	#-nan	#-nan
5S_rRNA	PRKCQ,PRKCQ-AS1	PRKCQ,PRKCQ-AS1	PRKCQ-001,PRKCQ-201,PRKCQ-202,PRKCQ-AS1-001,PRKCQ-AS1-002,PRKCQ-AS1-003,PRKCQ-AS1-004,PRKCQ-AS1-012,PRKCQ-AS1-013,PRKCQ-AS1-015(*),PRKCQ-AS1-018(*),PRKCQ-AS1-019(*)	10	6622332	6622442	74.66	0.015	0.007	0	0						#-nan	#-nan	#-nan
5S_rRNA	PRKG1	PRKG1	PRKG1-001,PRKG1-201	10	52751422	52751523	67.54	0	0	0	0						#-nan	#-nan	#-nan
5S_rRNA	PROSER2	PROSER2	PROSER2-001	10	11911981	11912084	69.36	0.032	0	0.01	0	1	rs17857360	0	#-nan	0	-0.97	#-nan	#-nan
5S_rRNA	PROSER2	PROSER2	PROSER2-004,PROSER2-005,PROSER2-201(*)	10	11865333	11865469	91.8	0.016	0	0.007	0						#-nan	#-nan	#-nan
5S_rRNA	PRTFDC1,RP11-165A20.3	PRTFDC1,RP11-165A20.3	PRTFDC1-001,PRTFDC1-002,PRTFDC1-003,RP11-165A20.3-001	10	25241727	25241868	95.47	0.023	0	0.012	0						#-nan	#-nan	#-nan
5S_rRNA	PRTFDC1,RP11-165A20.3	PRTFDC1,RP11-165A20.3	PRTFDC1-001,PRTFDC1-002,PRTFDC1-003,RP11-165A20.3-001	10	25241792	25241884	63.34	0.023	0	0.012	0						#-nan	#-nan	#-nan
5S_rRNA	PTCHD3	PTCHD3	PTCHD3-001,PTCHD3-201(*)	10	27702829	27702975	96.23	0	0	0.014	0	1	rs62624974	0.04	0.04	0.04	#-nan	#-nan	#-nan
5S_rRNA	PTF1A	PTF1A	PTF1A-001	10	23481701	23481898	137.76	0.005	0.005	0	0.005						#-nan	#-nan	#-nan
5S_rRNA	PTPLA	HACD1	PTPLA-001,PTPLA-002,PTPLA-003	10	17659219	17659402	122.21	0.03	0.011	0.018	0.011	3	rs76308933,rs117194385,rs118189437	0.04	0.04	0.02	-0.93	-0.73	#-nan
5S_rRNA	RASGEF1A	RASGEF1A	RASGEF1A-001	10	43762162	43762408	170.15	0.029	0	0.004	0						#-nan	#-nan	#-nan
5S_rRNA	RASSF4	RASSF4	RASSF4-001,RASSF4-002,RASSF4-005,RASSF4-008,RASSF4-201,RASSF4-202	10	45452893	45453010	77.62	0.011	0	0.009	0						#-nan	#-nan	#-nan
5S_rRNA	RASSF4,RP11-285G1.14,TMEM72-AS1	RASSF4,RP11-285G1.14,TMEM72-AS1	RASSF4-001,RASSF4-002,RASSF4-005,RASSF4-008,RASSF4-201,RASSF4-202,RP11-285G1.14-001,TMEM72-AS1-001	10	45455083	45455227	97.51	0.023	0	0.009	0	1	rs12773699	0.15	0	0.1	#-nan	#-nan	#-nan
5S_rRNA	RASSF4,RP11-285G1.14,TMEM72-AS1	RASSF4,RP11-285G1.14,TMEM72-AS1	RASSF4-001,RASSF4-002,RASSF4-005,RASSF4-008,RASSF4-201,RASSF4-202,RP11-285G1.14-001,TMEM72-AS1-001	10	45455072	45455183	76.18	0.023	0	0.009	0						#-nan	#-nan	#-nan
5S_rRNA	RBM17	RBM17	RBM17-003,RBM17-005,RBM17-007,RBM17-201	10	6130887	6131007	78.8	0.018	0	0	0	1	rs3750668	#-nan	0.08	0.08	#-nan	#-nan	#-nan
5S_rRNA	RBP4	RBP4	RBP4-001,RBP4-002,RBP4-003	10	95360852	95360999	98.89	0.009	0.014	0.007	0.007	1	rs10882283	0	0.12	0.08	1.59	0.1	1.51
5S_rRNA	RBP4	RBP4	RBP4-001,RBP4-002,RBP4-003,RBP4-201(*)	10	95360850	95360999	99.7	0.009	0.014	0.007	0.007	1	rs10882283	0	0.12	0.08	1.59	0.1	1.51
5S_rRNA	REEP3	REEP3	REEP3-001,REEP3-201	10	65280999	65281224	150.35	0.032	0.021	0.021	0						#-nan	#-nan	#-nan
5S_rRNA	RET	RET	RET-001,RET-002,RET-003,RET-201(*)	10	43572894	43573009	76.38	0.04	0.019	0	0.019	2	rs12246856,rs12246855	0.28	0.53	0.32	-0.9	1.63	-0.63
5S_rRNA	RHOBTB1	RHOBTB1	RHOBTB1-001	10	62761181	62761531	237.86	0.012	0	0.003	0	1	rs12263149	0.02	0.02	0.04	1.7	1.91	1.93
5S_rRNA	RNLS	RNLS	RNLS-002,RNLS-003,RNLS-004,RNLS-201	10	90342571	90342688	78.79	0.018	0	0.009	0	1	rs182339292	0	0	0	#-nan	#-nan	-0.97
5S_rRNA	RP11-137H2.4,SH2D4B	TSPAN14-AS1,SH2D4B	RP11-137H2.4-001,SH2D4B-005	10	82294568	82294744	123.06	10	0	0	0						#-nan	#-nan	#-nan
5S_rRNA	RP11-138I18.1,USP6NL	USP6NL-AS1,USP6NL	RP11-138I18.1-001,USP6NL-001,USP6NL-002	10	11653178	11653368	129.34	0.005	0	0	0						#-nan	#-nan	#-nan
5S_rRNA	RP11-162G10.5,ZNF248	ZNF248-AS1,ZNF248	RP11-162G10.5-001,ZNF248-001,ZNF248-002,ZNF248-004,ZNF248-005,ZNF248-006,ZNF248-201	10	38146832	38146935	70.38	0.011	0.021	0.021	0	1	rs140565090	0.02	0.02	0.02	#-nan	#-nan	-0.7
5S_rRNA	RP11-162G10.5,ZNF248	ZNF248-AS1,ZNF248	RP11-162G10.5-001,ZNF248-001,ZNF248-002,ZNF248-004,ZNF248-005,ZNF248-006,ZNF248-201,ZNF248-202(*),ZNF248-203(*)	10	38146835	38146926	63	0.011	0.021	0.021	0	1	rs140565090	0.02	0.02	0.02	#-nan	#-nan	-0.7
5S_rRNA	RP11-168L22.2	LINC02633	RP11-168L22.2-001	10	43817735	43817829	62.31	0.071	0	0.011	0						#-nan	#-nan	#-nan
5S_rRNA	RP11-182L21.6,RP11-773D16.1	RP11-182L21.6,RP11-773D16.1	RP11-182L21.6-001,RP11-773D16.1-001,RP11-773D16.1-002,RP11-773D16.1-003,RP11-773D16.1-004,RP11-773D16.1-005,RP11-773D16.1-006	10	81586014	81586202	127.7	0.006	0	0	0						#-nan	#-nan	#-nan
5S_rRNA	RP11-182L21.6,RP11-773D16.1	RP11-182L21.6,RP11-773D16.1	RP11-182L21.6-001,RP11-773D16.1-001,RP11-773D16.1-002,RP11-773D16.1-003,RP11-773D16.1-004,RP11-773D16.1-005,RP11-773D16.1-006	10	81586500	81586636	90.45	0.006	0	0	0						#-nan	#-nan	#-nan
5S_rRNA	RP11-182L21.6,RP11-773D16.1,NUTM2B-AS1	RP11-182L21.6,RP11-773D16.1,NUTM2B-AS1	RP11-182L21.6-001,RP11-773D16.1-001,RP11-773D16.1-002,RP11-773D16.1-003,RP11-773D16.1-004,RP11-773D16.1-005,RP11-773D16.1-006,NUTM2B-AS1-001(*)	10	81585713	81585867	102.51	0.006	0	0	0						#-nan	#-nan	#-nan
5S_rRNA	RP11-182L21.6,RP11-773D16.1,NUTM2B-AS1	RP11-182L21.6,RP11-773D16.1,NUTM2B-AS1	RP11-182L21.6-001,RP11-773D16.1-001,RP11-773D16.1-002,RP11-773D16.1-003,RP11-773D16.1-004,RP11-773D16.1-005,RP11-773D16.1-006,NUTM2B-AS1-013(*)	10	81585718	81585885	111.76	0.006	0	0	0						#-nan	#-nan	#-nan
5S_rRNA	RP11-336A10.5	RP11-336A10.5	RP11-336A10.5-001	10	5652576	5652670	62.31	0	0.034	0.09	0	3	rs148448550,.,.	0	0.05	0.02	0.78	0.43	1.96
5S_rRNA	RP11-348J12.2	CYP26C1-DT	RP11-348J12.2-001	10	94822782	94822954	115.37	0.019	0.006	0.012	0.006	2	rs12263200,rs111691473	0.07	0.16	0.11	-0.43	-0.64	0.97
5S_rRNA	RP11-351M16.3	LINC02652	RP11-351M16.3-001	10	28786509	28786607	65.53	0.051	0.05	0	0	1	rs148458322	0.03	0.03	0.03	#-nan	#-nan	-0.2
5S_rRNA	RP11-393J16.4,ZNF25	ZNF25-DT,ZNF25	RP11-393J16.4-001,ZNF25-001,ZNF25-002,ZNF25-003	10	38265149	38265244	63.52	0.011	0	0	0						#-nan	#-nan	#-nan
5S_rRNA	RP11-398B16.2	RP11-398B16.2	RP11-398B16.2-001	10	1405505	1405621	77.59	0.018	0	0	0						#-nan	#-nan	#-nan
5S_rRNA	RP11-398C13.6,SUV39H2	SUV39H2-DT,SUV39H2	RP11-398C13.6-001,SUV39H2-001,SUV39H2-002,SUV39H2-003,SUV39H2-004,SUV39H2-005,SUV39H2-006,SUV39H2-007,SUV39H2-008	10	14920618	14920733	76.38	0.05	0	0.019	0	3	rs200159062,rs75497017,rs151268820	0.08	0.07	0.09	#-nan	#-nan	-0.75
5S_rRNA	RP11-399K21.10,C10orf11	RP11-399K21.10,LRMDA	RP11-399K21.10-001,C10orf11-006(*)	10	77191216	77191313	65.28	0	0	0	0						#-nan	#-nan	#-nan
5S_rRNA	RP11-399K21.11,ZNF503,ZNF503-AS2	RP11-399K21.11,ZNF503,ZNF503-AS2	RP11-399K21.11-002,ZNF503-001,ZNF503-201,ZNF503-AS2-001,ZNF503-AS2-002,ZNF503-AS2-003,ZNF503-AS2-004,ZNF503-AS2-005,ZNF503-AS2-006,ZNF503-AS2-201	10	77161177	77161268	63.84	0	0	0	0						#-nan	#-nan	#-nan
5S_rRNA	RP11-425A6.5	RP11-425A6.5	RP11-425A6.5-001	10	35896768	35896861	63.76	0.024	0	0.051	0	2	rs200962125,rs200332566	0	0	0	0.97	1.83	-1.35
5S_rRNA	RP11-445N18.7	RP11-445N18.7	RP11-445N18.7-001	10	45640766	45640858	60.59	0.011	0	0	0						#-nan	#-nan	#-nan
5S_rRNA	RP11-457D2.3	RP11-457D2.3	RP11-457D2.3-001	10	18155986	18156151	109.3	0.019	0	0	0						#-nan	#-nan	#-nan
5S_rRNA	RP11-463P17.3,ZNF488	RP11-463P17.3,ZNF488	RP11-463P17.3-001,ZNF488-002,ZNF488-003,ZNF488-004,ZNF488-005,ZNF488-006,ZNF488-201	10	48354529	48354691	112.19	0.006	0	0.013	0	2	rs4922490,rs147911904	0.01	0.09	0.1	1.54	1.72	0.69
5S_rRNA	RP11-464F9.1,RP11-574K11.28	BMS1P4-AGAP5,RP11-574K11.28	RP11-464F9.1-001,RP11-464F9.1-201,RP11-574K11.28-001	10	75492926	75493046	82.01	0.019	0	0.017	0						#-nan	#-nan	#-nan
5S_rRNA	RP11-464F9.1,RP11-574K11.28,BMS1P4	BMS1P4-AGAP5,RP11-574K11.28,BMS1P4	RP11-464F9.1-001,RP11-464F9.1-201,RP11-574K11.28-001,BMS1P4-001(*)	10	75492940	75493187	169.74	0.019	0	0.017	0	1	rs71507081	0.13	0.21	0.29	1.9	-0.54	1.45
5S_rRNA	RP11-472G21.2	RP11-472G21.2	RP11-472G21.2-001	10	73635486	73635638	103.22	0.044	0.007	0.007	0						#-nan	#-nan	#-nan
5S_rRNA	RP11-50E11.3,SGMS1	RP11-50E11.3,SGMS1	RP11-50E11.3-001,RP11-50E11.3-002,SGMS1-003,SGMS1-006,SGMS1-007,SGMS1-202	10	52383755	52383850	63.52	0.023	0.007	0.007	0.007						#-nan	#-nan	#-nan
5S_rRNA	RP11-50E11.3,SGMS1	RP11-50E11.3,SGMS1	RP11-50E11.3-001,RP11-50E11.3-002,SGMS1-003,SGMS1-007,SGMS1-202(*),SGMS1-203(*)	10	52383252	52383394	95.88	0.023	0.007	0.007	0.007	1	rs4268459	0.29	0.33	0.19	1.51	1.71	-0.97
5S_rRNA	RP11-517P14.2,U3.46	LINC02916,U3.46	RP11-517P14.2-001,U3.46-201	10	43915954	43916054	67.32	0.01	0.01	0.01	0.01	2	rs2248931,rs2248933	0.39	0.3	0.26	1.32	1.89	1.92
5S_rRNA	RP11-573G6.10	RP11-573G6.10	RP11-573G6.10-001	10	22629521	22629698	120.77	0.006	0	0.006	0	1	rs7094794	0.13	0.14	0.13	#-nan	#-nan	0.35
5S_rRNA	RP11-573G6.4	RP11-573G6.4	RP11-573G6.4-001(*)	10	22541395	22541538	95.68	0	0	0	0						#-nan	#-nan	#-nan
5S_rRNA	RP11-574K11.29	RP11-574K11.29	RP11-574K11.29-001,RP11-574K11.29-002	10	75475309	75475406	66.1	0.047	0	0.022	0	1	rs142264712	0.06	0.07	0.07	#-nan	#-nan	-0.26
5S_rRNA	RP11-57G10.8	RP11-57G10.8	RP11-57G10.8-001	10	69608980	69609103	78.34	0.22	0.026	0	0						#-nan	#-nan	#-nan
5S_rRNA	RP11-77P6.2,WAPAL	WAPL-DT,WAPL	RP11-77P6.2-001,WAPAL-001	10	88281668	88281793	84.86	0	0	0.017	0	2	rs1917161,rs12249807	0.07	0.03	0.08	-0.19	1.56	0.64
5S_rRNA	RP11-85A1.3,SLC25A28	SLC25A28-DT,SLC25A28	RP11-85A1.3-001,SLC25A28-001,SLC25A28-004,SLC25A28-005,SLC25A28-006	10	101379890	101380022	88.04	0	0	0.008	0						#-nan	#-nan	#-nan
5S_rRNA	RPP30	RPP30	RPP30-001,RPP30-004,RPP30-005,RPP30-201	10	92628400	92628497	64.15	0.034	0	0.01	0	1	rs192387661	0.01	0.01	0.01	#-nan	#-nan	-0.83
5S_rRNA	RUFY2	RUFY2	RUFY2-001,RUFY2-007,RUFY2-009,RUFY2-010,RUFY2-201,RUFY2-202,RUFY2-203	10	70166976	70167116	95.06	0.015	0.007	0.015	0.015	3	rs143640573,rs138151791,rs7098448	0.06	0.07	0.05	-0.14	0.53	0.06
5S_rRNA	SAR1A	SAR1A	SAR1A-001,SAR1A-002,SAR1A-007,SAR1A-202	10	71930354	71930480	84.02	0.008	0	0.008	0						#-nan	#-nan	#-nan
5S_rRNA	SEC31B	SEC31B	SEC31B-001,SEC31B-003,SEC31B-004,SEC31B-009,SEC31B-010,SEC31B-013,SEC31B-201,SEC31B-202	10	102279576	102279692	77.59	0.028	0	0	0						#-nan	#-nan	#-nan
5S_rRNA	SEC61A2	SEC61A2	SEC61A2-001,SEC61A2-002,SEC61A2-006,SEC61A2-007,SEC61A2-008,SEC61A2-009,SEC61A2-010,SEC61A2-011,SEC61A2-012,SEC61A2-201	10	12171477	12171606	86.83	0.032	0	0.008	0						#-nan	#-nan	#-nan
5S_rRNA	SEC61A2	SEC61A2	SEC61A2-001,SEC61A2-002,SEC61A2-006,SEC61A2-007,SEC61A2-008,SEC61A2-009,SEC61A2-010,SEC61A2-011,SEC61A2-012,SEC61A2-201	10	12171475	12171606	87.64	0.032	0	0.008	0						#-nan	#-nan	#-nan
5S_rRNA	SEPHS1	SEPHS1	SEPHS1-001,SEPHS1-002,SEPHS1-003,SEPHS1-005,SEPHS1-201,SEPHS1-202	10	13390113	13390203	62.51	0.024	0	0.012	0						#-nan	#-nan	#-nan
5S_rRNA	SFRP5	SFRP5	SFRP5-001	10	99531688	99531788	68.31	0.011	0	0.049	0	1	rs11189367	0.4	0.04	0.23	0.8	1.95	1.53
5S_rRNA	SFTPD	SFTPD	SFTPD-002	10	81741454	81741563	72.36	0.194	0	0.019	0						#-nan	#-nan	#-nan
5S_rRNA	SGMS1	SGMS1	SGMS1-004	10	52177950	52178109	107.71	0.013	0	0.006	0	1	rs190465719	0.02	0.02	0.02	#-nan	#-nan	-0.77
5S_rRNA	SGPL1	SGPL1	SGPL1-001,SGPL1-002	10	72575961	72576100	95.22	0.008	0	0.007	0						#-nan	#-nan	#-nan
5S_rRNA	SIRT1	SIRT1	SIRT1-001,SIRT1-004,SIRT1-005,SIRT1-201	10	69644547	69644674	87.77	0	0	0	0						#-nan	#-nan	#-nan
5S_rRNA	SKIDA1	SKIDA1	SKIDA1-001,SKIDA1-002	10	21816127	21816239	74.37	0.03	0	0	0						#-nan	#-nan	#-nan
5S_rRNA	SKIDA1	SKIDA1	SKIDA1-001,SKIDA1-002	10	21815023	21815165	96.7	0.03	0	0	0						#-nan	#-nan	#-nan
5S_rRNA	SLC16A12	SLC16A12	SLC16A12-001,SLC16A12-201	10	91295417	91295522	71.81	0.044	0	0	0						#-nan	#-nan	#-nan
5S_rRNA	SLC16A9	SLC16A9	SLC16A9-001,SLC16A9-002	10	61469265	61469362	67.07	0.022	0	0.01	0	1	rs114760926	0.02	0.02	0.02	#-nan	#-nan	-0.77
5S_rRNA	SLC35G1	SLC35G1	SLC35G1-001,SLC35G1-002,SLC35G1-003,SLC35G1-004,SLC35G1-005,SLC35G1-201	10	95653709	95653864	102.17	0.007	0	0.007	0						#-nan	#-nan	#-nan
5S_rRNA	SLIT1	SLIT1	SLIT1-001,SLIT1-003,SLIT1-004,SLIT1-006,SLIT1-009	10	98945339	98945463	85.7	0	0	0	0						#-nan	#-nan	#-nan
5S_rRNA	SORBS1	SORBS1	SORBS1-001,SORBS1-002,SORBS1-014,SORBS1-015,SORBS1-017,SORBS1-201,SORBS1-202,SORBS1-203,SORBS1-204,SORBS1-205	10	97321000	97321119	80.78	0.032	0	0.009	0	1	rs150571045	0	0	0	-0.25	-0.31	-0.32
5S_rRNA	SPAG6	SPAG6	SPAG6-004,SPAG6-005,SPAG6-006,SPAG6-007,SPAG6-008,SPAG6-201,SPAG6-202,SPAG6-203	10	22634477	22634598	82.42	0.01	0	0.017	0	1	rs200290428	0	#-nan	0	-0.63	#-nan	#-nan
5S_rRNA	SPAG6	SPAG6	SPAG6-004,SPAG6-005,SPAG6-006,SPAG6-007,SPAG6-008,SPAG6-201,SPAG6-202,SPAG6-203	10	22634223	22634331	73.85	0.01	0	0.017	0	1	rs7084298	0.13	0.14	0.13	#-nan	#-nan	0.35
5S_rRNA	SPOCK2	SPOCK2	SPOCK2-003,SPOCK2-004,SPOCK2-005,SPOCK2-201,SPOCK2-202,SPOCK2-203	10	73847565	73847695	87.72	0.026	0	0	0						#-nan	#-nan	#-nan
5S_rRNA	ST8SIA6	ST8SIA6	ST8SIA6-001	10	17496152	17496377	152.59	0	0	0.004	0	1	rs140398395	0.02	0.11	0.06	-0.56	#-nan	0.08
5S_rRNA	STOX1	STOX1	STOX1-001,STOX1-002,STOX1-003,STOX1-004,STOX1-201	10	70587238	70587386	102.26	0.014	0	0.014	0	2	rs147494991,rs184399576	0.04	0.05	0.04	#-nan	#-nan	-0.87
5S_rRNA	SUPV3L1	SUPV3L1	SUPV3L1-001,SUPV3L1-002,SUPV3L1-003,SUPV3L1-005	10	70939970	70940116	96.23	0.007	0.021	0.021	0	3	rs12251842,rs181062326,rs33998366	0.16	0.17	0.17	#-nan	#-nan	0.18
5S_rRNA	SVIL	SVIL	SVIL-001,SVIL-002,SVIL-201	10	30025945	30026052	73.69	0	0	0.009	0	1	rs185246508	#-nan	0	0	#-nan	-0.9	#-nan
5S_rRNA	TACR2	TACR2	TACR2-002	10	71168559	71168660	67.54	0.093	0.095	0.033	0.01	3	rs113690919,.,.	0.08	0.21	0.13	2.95	2.04	1.71
5S_rRNA	TET1	TET1	TET1-001	10	70320539	70320641	68.74	0.035	0	0	0						#-nan	#-nan	#-nan
5S_rRNA	TFAM	TFAM	TFAM-001,TFAM-002,TFAM-003,TFAM-004	10	60144928	60145034	71.15	0.02	0	0.02	0	2	rs7904826,rs2279339	0	0	0	0	0.65	-0.06
5S_rRNA	TLX1,TLX1NB	TLX1,TLX1NB	TLX1-002,TLX1-003,TLX1-004,TLX1-005,TLX1NB-001,TLX1NB-002,TLX1-001(*)	10	102891464	102891553	60.38	0.039	0	0	0						#-nan	#-nan	#-nan
5S_rRNA	TM9SF3	TM9SF3	TM9SF3-001,TM9SF3-003,TM9SF3-004	10	98346613	98346748	93.56	0	0	0.008	0.008	2	rs199747093,rs1062176	0.04	0.12	0.06	-0.76	-0.96	-0.51
5S_rRNA	TNKS2,TNKS2-AS1	TNKS2,TNKS2-DT	TNKS2-001,TNKS2-AS1-001,TNKS2-AS1-002	10	93558170	93558452	189.34	0.007	0	0.023	0						#-nan	#-nan	#-nan
5S_rRNA	TNKS2,TNKS2-AS1	TNKS2,TNKS2-DT	TNKS2-001,TNKS2-AS1-001,TNKS2-AS1-002	10	93558134	93558312	118.59	0.007	0	0.023	0	1	rs148775233	0.01	0	0	#-nan	#-nan	#-nan
5S_rRNA	TRDMT1	TRDMT1	TRDMT1-001,TRDMT1-002,TRDMT1-005,TRDMT1-006,TRDMT1-007,TRDMT1-008,TRDMT1-010,TRDMT1-011,TRDMT1-012,TRDMT1-201,TRDMT1-202,TRDMT1-203,TRDMT1-204,TRDMT1-205	10	17243603	17243734	86.33	0.008	0	0.016	0	2	rs11254458,rs182058526	0.02	0.06	0.04	-0.76	-0.15	-0.83
5S_rRNA	TRDMT1	TRDMT1	TRDMT1-001,TRDMT1-002,TRDMT1-005,TRDMT1-006,TRDMT1-007,TRDMT1-008,TRDMT1-010,TRDMT1-011,TRDMT1-012,TRDMT1-201,TRDMT1-202,TRDMT1-203,TRDMT1-204,TRDMT1-205	10	17243598	17243746	96.33	0.008	0	0.016	0	2	rs11254458,rs182058526	0.02	0.06	0.04	-0.76	-0.15	-0.83
5S_rRNA	TSPAN14	TSPAN14	TSPAN14-001,TSPAN14-002,TSPAN14-003,TSPAN14-007,TSPAN14-008,TSPAN14-009,TSPAN14-010	10	82213824	82213918	64.17	0.011	0	0	0						#-nan	#-nan	#-nan
5S_rRNA	TUBB8	TUBB8	TUBB8-001,TUBB8-002,TUBB8-003,TUBB8-201,TUBB8-005(*),TUBB8-006(*)	10	94868	94976	71.68	0.113	0	0.042	0	3	rs11251920,rs112134897,rs11251919	0	0.3	0.2	2.62	0.21	1.94
5S_rRNA	TUBB8	TUBB8	TUBB8-001,TUBB8-002,TUBB8-003,TUBB8-201,TUBB8-007(*),TUBB8-008(*)	10	94885	94981	62.96	0.113	0	0.042	0						#-nan	#-nan	#-nan
5S_rRNA	TYSND1	TYSND1	TYSND1-001,TYSND1-002,TYSND1-003,TYSND1-004	10	71905944	71906061	81.14	0.018	0	0.018	0.009	2	rs11549688,rs145700158	0.02	0.04	0.01	-1.12	-0.54	#-nan
5S_rRNA	UBE2D1	UBE2D1	UBE2D1-001,UBE2D1-201(*)	10	60095019	60095143	81.18	0.008	0.021	0.021	0	3	rs1905456,rs112660736,rs117464571	0	0	0	-0.16	0.48	0.45
5S_rRNA	UPF2	UPF2	UPF2-001	10	12077108	12077219	77	0.009	0	0.019	0						#-nan	#-nan	#-nan
5S_rRNA	UPF2	UPF2	UPF2-002,UPF2-004,UPF2-201	10	12084836	12084937	64.51	0	0	0	0						#-nan	#-nan	#-nan
5S_rRNA	VDAC2	VDAC2	VDAC2-001,VDAC2-002,VDAC2-003,VDAC2-005,VDAC2-006,VDAC2-007,VDAC2-008,VDAC2-009,VDAC2-010,VDAC2-011,VDAC2-012,VDAC2-013,VDAC2-201,VDAC2-202	10	76970219	76970318	64.74	0	0	0.01	0						#-nan	#-nan	#-nan
5S_rRNA	VIM,VIM-AS1	VIM,VIM-AS1	VIM-001,VIM-002,VIM-003,VIM-004,VIM-005,VIM-006,VIM-007,VIM-008,VIM-201,VIM-AS1-001,VIM-AS1-002	10	17271296	17271405	72.07	0.075	0.021	0.021	0	2	rs3758410,rs200253669	0.31	0.3	0.22	1.48	0.39	1.27
5S_rRNA	VIM,VIM-AS1	VIM,VIM-AS1	VIM-001,VIM-002,VIM-003,VIM-007,VIM-008,VIM-009,VIM-AS1-001,VIM-AS1-002	10	17272021	17272130	75.35	0.075	0.013	0.026	0.013	2	rs116511811,rs148498270	0.06	0.06	0.06	#-nan	#-nan	-0.32
5S_rRNA	VPS26A	VPS26A	VPS26A-001,VPS26A-004,VPS26A-006,VPS26A-007,VPS26A-008,VPS26A-201,VPS26A-202,VPS26A-203,VPS26A-204	10	70883829	70883947	78.39	0.009	0	0.009	0						#-nan	#-nan	#-nan
5S_rRNA	VSTM4	VSTM4	VSTM4-001,VSTM4-002	10	50323374	50323650	187.27	0.028	0	0	0						#-nan	#-nan	#-nan
5S_rRNA	WAC,WAC-AS1	WAC,WAC-AS1	WAC-001,WAC-003,WAC-004,WAC-005,WAC-006,WAC-009,WAC-010,WAC-012,WAC-016,WAC-017,WAC-018,WAC-021,WAC-022,WAC-023,WAC-024,WAC-201,WAC-AS1-001,WAC-AS1-002	10	28822333	28822445	73.26	0.019	0.009	0.009	0.009						#-nan	#-nan	#-nan
5S_rRNA	WAC,WAC-AS1	WAC,WAC-AS1	WAC-001,WAC-003,WAC-004,WAC-005,WAC-006,WAC-009,WAC-010,WAC-012,WAC-016,WAC-017,WAC-018,WAC-021,WAC-022,WAC-023,WAC-024,WAC-201,WAC-AS1-001,WAC-AS1-002	10	28821350	28821453	69.14	0.019	0.009	0.009	0.009	1	rs61848475	0.27	#-nan	0.27	1.3	#-nan	#-nan
5S_rRNA	WAC,WAC-AS1	WAC,WAC-AS1	WAC-001,WAC-003,WAC-004,WAC-005,WAC-006,WAC-009,WAC-010,WAC-012,WAC-016,WAC-017,WAC-018,WAC-021,WAC-022,WAC-023,WAC-024,WAC-201,WAC-AS1-001,WAC-AS1-002	10	28822333	28822444	74.77	0.019	0.009	0.009	0.009						#-nan	#-nan	#-nan
5S_rRNA	WAPAL	WAPL	WAPAL-005	10	88214610	88214864	170.05	0.03	0	0.004	0						#-nan	#-nan	#-nan
5S_rRNA	WDR37	WDR37	WDR37-002,WDR37-004,WDR37-201(*)	10	1102380	1102501	82.8	0.008	0	0.008	0	1	rs10903358	0.2	0	0.19	0.89	-0.96	#-nan
5S_rRNA	ZCCHC24	ZCCHC24	ZCCHC24-001,ZCCHC24-002	10	81205247	81205372	86.11	0	0	0	0						#-nan	#-nan	#-nan
5S_rRNA	ZEB1,ZEB1-AS1	ZEB1,ZEB1-AS1	ZEB1-001,ZEB1-002,ZEB1-003,ZEB1-004,ZEB1-005,ZEB1-007,ZEB1-008,ZEB1-009,ZEB1-010,ZEB1-011,ZEB1-012,ZEB1-013,ZEB1-015,ZEB1-016,ZEB1-017,ZEB1-018,ZEB1-019,ZEB1-020,ZEB1-021,ZEB1-022,ZEB1-024,ZEB1-025,ZEB1-201,ZEB1-202,ZEB1-AS1-001,ZEB1-AS1-002,ZEB1-AS1-003,ZEB1-AS1-004,ZEB1-AS1-005,ZEB1-AS1-006,ZEB1-AS1-007,ZEB1-AS1-008,ZEB1-AS1-009	10	31608773	31608882	74.26	0.557	0	0.016	0						#-nan	#-nan	#-nan
5S_rRNA	ZEB1,ZEB1-AS1	ZEB1,ZEB1-AS1	ZEB1-001,ZEB1-002,ZEB1-003,ZEB1-004,ZEB1-005,ZEB1-007,ZEB1-008,ZEB1-009,ZEB1-010,ZEB1-011,ZEB1-012,ZEB1-013,ZEB1-015,ZEB1-016,ZEB1-017,ZEB1-018,ZEB1-019,ZEB1-020,ZEB1-021,ZEB1-022,ZEB1-024,ZEB1-025,ZEB1-201,ZEB1-202,ZEB1-AS1-001,ZEB1-AS1-002,ZEB1-AS1-003,ZEB1-AS1-004,ZEB1-AS1-005,ZEB1-AS1-006,ZEB1-AS1-007,ZEB1-AS1-008,ZEB1-AS1-009	10	31608774	31608882	74.93	0.557	0	0.016	0						#-nan	#-nan	#-nan
5S_rRNA	ZEB1,ZEB1-AS1	ZEB1,ZEB1-AS1	ZEB1-001,ZEB1-002,ZEB1-003,ZEB1-004,ZEB1-005,ZEB1-007,ZEB1-008,ZEB1-009,ZEB1-010,ZEB1-011,ZEB1-012,ZEB1-013,ZEB1-015,ZEB1-016,ZEB1-017,ZEB1-018,ZEB1-019,ZEB1-020,ZEB1-021,ZEB1-022,ZEB1-024,ZEB1-025,ZEB1-201,ZEB1-202,ZEB1-AS1-001,ZEB1-AS1-002,ZEB1-AS1-003,ZEB1-AS1-004,ZEB1-AS1-005,ZEB1-AS1-006,ZEB1-AS1-007,ZEB1-AS1-008,ZEB1-AS1-009	10	31608246	31608376	86.43	0.557	0	0.016	0	2	rs200849283,rs200356122	0.02	0.02	0.02	-0.44	1.14	0.54
5S_rRNA	ZEB1,ZEB1-AS1	ZEB1,ZEB1-AS1	ZEB1-001,ZEB1-002,ZEB1-003,ZEB1-004,ZEB1-005,ZEB1-007,ZEB1-008,ZEB1-009,ZEB1-010,ZEB1-011,ZEB1-012,ZEB1-013,ZEB1-015,ZEB1-016,ZEB1-017,ZEB1-018,ZEB1-019,ZEB1-020,ZEB1-021,ZEB1-022,ZEB1-024,ZEB1-025,ZEB1-201,ZEB1-202,ZEB1-AS1-001,ZEB1-AS1-002,ZEB1-AS1-003,ZEB1-AS1-004,ZEB1-AS1-005,ZEB1-AS1-006,ZEB1-AS1-007,ZEB1-AS1-008,ZEB1-AS1-009	10	31608766	31608854	60.03	0.557	0	0.016	0						#-nan	#-nan	#-nan
5S_rRNA	ZEB1,ZEB1-AS1	ZEB1,ZEB1-AS1	ZEB1-001,ZEB1-002,ZEB1-003,ZEB1-004,ZEB1-005,ZEB1-007,ZEB1-008,ZEB1-009,ZEB1-010,ZEB1-011,ZEB1-012,ZEB1-013,ZEB1-015,ZEB1-016,ZEB1-017,ZEB1-018,ZEB1-019,ZEB1-020,ZEB1-021,ZEB1-022,ZEB1-024,ZEB1-025,ZEB1-201,ZEB1-202,ZEB1-AS1-001,ZEB1-AS1-002,ZEB1-AS1-003,ZEB1-AS1-005,ZEB1-AS1-007,ZEB1-AS1-008,ZEB1-AS1-009	10	31607659	31607770	77	0.557	0	0.016	0						#-nan	#-nan	#-nan
5S_rRNA	ZFAND4	ZFAND4	ZFAND4-002,ZFAND4-003,ZFAND4-004,ZFAND4-005,ZFAND4-007,ZFAND4-008,ZFAND4-201	10	46167996	46168120	81.18	0.008	0	0.012	0						#-nan	#-nan	#-nan
5S_rRNA	ZFAND4	ZFAND4	ZFAND4-002,ZFAND4-003,ZFAND4-004,ZFAND4-005,ZFAND4-007,ZFAND4-008,ZFAND4-201	10	46167932	46168103	114.97	0.008	0	0.012	0	1	rs183428427	#-nan	0.01	0.01	#-nan	-0.77	#-nan
5S_rRNA	ZFYVE27	ZFYVE27	ZFYVE27-003,ZFYVE27-005,ZFYVE27-006,ZFYVE27-007,ZFYVE27-201,ZFYVE27-202,ZFYVE27-203,ZFYVE27-204,ZFYVE27-205,ZFYVE27-206	10	99497030	99497164	88.31	0.008	0	0	0						#-nan	#-nan	#-nan
5S_rRNA	ZMYND11	ZMYND11	ZMYND11-002,ZMYND11-003,ZMYND11-004,ZMYND11-005,ZMYND11-009,ZMYND11-201,ZMYND11-202,ZMYND11-204,ZMYND11-205,ZMYND11-206	10	180881	181018	93.02	0.022	0	0.015	0	1	rs146152255	0.27	0.06	0.17	1.45	0	-0.9
5S_rRNA	ZMYND11	ZMYND11	ZMYND11-002,ZMYND11-003,ZMYND11-004,ZMYND11-005,ZMYND11-009,ZMYND11-201,ZMYND11-202,ZMYND11-204,ZMYND11-205,ZMYND11-206	10	181796	181895	66.91	0.022	0	0.015	0						#-nan	#-nan	#-nan
5S_rRNA	ZMYND11	ZMYND11	ZMYND11-002,ZMYND11-003,ZMYND11-004,ZMYND11-005,ZMYND11-009,ZMYND11-201,ZMYND11-202,ZMYND11-204,ZMYND11-205,ZMYND11-206	10	180851	181010	106.93	0.022	0	0.015	0	1	rs146152255	0.27	0.06	0.17	1.45	0	-0.9
5S_rRNA	ZNF239	ZNF239	ZNF239-002,ZNF239-003,ZNF239-201,ZNF239-202	10	44069644	44069750	72.45	0.02	0	0	0						#-nan	#-nan	#-nan
5S_rRNA	ZNF32	ZNF32	ZNF32-001,ZNF32-003,ZNF32-201	10	44143933	44144083	101.59	0.014	0	0	0						#-nan	#-nan	#-nan
5S_rRNA	ZNF33A	ZNF33A	ZNF33A-001,ZNF33A-003,ZNF33A-004,ZNF33A-005,ZNF33A-201,ZNF33A-202,ZNF33A-203	10	38299746	38299839	62.83	0	0	0.048	0	3	rs12257902,rs56709119,rs190998340	0.08	0.1	0.09	-1.26	#-nan	0.03
5S_rRNA	ZNF33B	ZNF33B	ZNF33B-003,ZNF33B-004,ZNF33B-005,ZNF33B-006,ZNF33B-201	10	43133566	43133696	83.33	0.026	0	0.047	0	3	rs2483695,rs115022240,rs2484297	0.21	0.04	0.16	-0.97	-0.65	-0.51
5S_rRNA	ZNF365	ZNF365	ZNF365-001,ZNF365-002,ZNF365-003,ZNF365-004,ZNF365-010	10	64134018	64134116	65.53	0.011	0	0	0						#-nan	#-nan	#-nan
5S_rRNA	ZNF438	ZNF438	ZNF438-002,ZNF438-201,ZNF438-202,ZNF438-203,ZNF438-205	10	31320820	31320970	100.9	0.014	0	0.007	0.014	1	rs1690622	0.16	0.01	0.09	1.92	1.56	1.17
5S_rRNA	ZNF503-AS1	ZNF503-AS1	ZNF503-AS1-001,ZNF503-AS1-004,ZNF503-AS1-005,ZNF503-AS1-006	10	77054879	77055028	101.18	0.021	0	0.014	0	1	rs186413948	0.05	0.06	0.05	#-nan	#-nan	-0.38
5S_rRNA	ZSWIM8	ZSWIM8	ZSWIM8-012,ZSWIM8-013,ZSWIM8-018,ZSWIM8-019,ZSWIM8-021,ZSWIM8-027,ZSWIM8-201	10	75545520	75545677	106.9	0	0	0.006	0						#-nan	#-nan	#-nan
5S_rRNA	ACAD8,THYN1	ACAD8,THYN1	ACAD8-001,ACAD8-002,ACAD8-004,ACAD8-005,ACAD8-006,ACAD8-007,ACAD8-008,ACAD8-009,ACAD8-010,ACAD8-011,ACAD8-012,ACAD8-013,ACAD8-014,ACAD8-201,ACAD8-202,THYN1-001,THYN1-002,THYN1-003,THYN1-004,THYN1-005,THYN1-006,THYN1-008,THYN1-009	11	134123823	134123940	78.79	0.039	0	0.01	0	1	rs112544573	0.17	0.18	0.17	#-nan	#-nan	1.68
5S_rRNA	ACAD8,THYN1	ACAD8,THYN1	ACAD8-001,ACAD8-002,ACAD8-004,ACAD8-005,ACAD8-006,ACAD8-007,ACAD8-008,ACAD8-009,ACAD8-010,ACAD8-011,ACAD8-012,ACAD8-013,ACAD8-014,ACAD8-201,ACAD8-202,THYN1-001,THYN1-002,THYN1-003,THYN1-004,THYN1-005,THYN1-006,THYN1-008,THYN1-009	11	134123687	134123907	146.73	0.039	0	0.01	0	2	rs112544573,rs71486997	0.11	0.15	0.12	-0.37	#-nan	0.03
5S_rRNA	ACAD8,THYN1	ACAD8,THYN1	ACAD8-001,ACAD8-002,ACAD8-004,ACAD8-005,ACAD8-006,ACAD8-007,ACAD8-008,ACAD8-009,ACAD8-010,ACAD8-011,ACAD8-012,ACAD8-013,ACAD8-014,ACAD8-201,ACAD8-202,THYN1-001,THYN1-002,THYN1-003,THYN1-004,THYN1-005,THYN1-006,THYN1-008,THYN1-009	11	134123694	134123918	149.95	0.039	0	0.01	0	2	rs112544573,rs71486997	0.11	0.15	0.12	-0.37	#-nan	0.03
5S_rRNA	ACAD8,THYN1	ACAD8,THYN1	ACAD8-001,ACAD8-002,ACAD8-004,ACAD8-005,ACAD8-006,ACAD8-007,ACAD8-008,ACAD8-009,ACAD8-010,ACAD8-011,ACAD8-012,ACAD8-013,ACAD8-014,ACAD8-201,ACAD8-202,THYN1-001,THYN1-002,THYN1-003,THYN1-004,THYN1-005,THYN1-006,THYN1-008,THYN1-009	11	134123690	134123917	151.96	0.039	0	0.01	0	2	rs112544573,rs71486997	0.11	0.15	0.12	-0.37	#-nan	0.03
5S_rRNA	AP005135.2	LINC02684	AP005135.2-001	11	134946091	134946242	102	10	0	0.007	0						#-nan	#-nan	#-nan
5S_rRNA	APLP2	APLP2	APLP2-001,APLP2-002,APLP2-003,APLP2-005,APLP2-008,APLP2-009,APLP2-010,APLP2-011,APLP2-014,APLP2-015,APLP2-018,APLP2-020,APLP2-021,APLP2-022,APLP2-023,APLP2-027,APLP2-028,APLP2-029,APLP2-031,APLP2-201,APLP2-202	11	129939496	129939616	82.01	0.027	0	0	0						#-nan	#-nan	#-nan
5S_rRNA	ARHGAP32	ARHGAP32	ARHGAP32-009	11	129149050	129149284	161.05	0.049	0	0	0						#-nan	#-nan	#-nan
5S_rRNA	B3GAT1	B3GAT1	B3GAT1-001,B3GAT1-003,B3GAT1-201	11	134281957	134282065	69.81	0.084	0.01	0	0						#-nan	#-nan	#-nan
5S_rRNA	BARX2	BARX2	BARX2-001	11	129245798	129245940	96.7	0.007	0	0	0						#-nan	#-nan	#-nan
5S_rRNA	ETS1,MIR6090	ETS1,MIR6090	ETS1-003,ETS1-005,ETS1-006,ETS1-201,ETS1-202,MIR6090-201(*)	11	128392238	128392370	87.52	0	0	0.008	0						#-nan	#-nan	#-nan
5S_rRNA	FLI1,RP11-744N12.3	FLI1,RP11-744N12.3	FLI1-008,FLI1-202,RP11-744N12.3-001	11	128560108	128560211	66.3	0.031	0.021	0.033	0.021	3	rs3016775,rs140164992,rs55813957	0.07	0.08	0.05	1.94	1.9	1.96
5S_rRNA	GLB1L2	GLB1L2	GLB1L2-002,GLB1L2-201,GLB1L2-202	11	134201612	134201759	98.09	0.014	0.021	0.021	0	3	.,.,rs3132808	0.02	0.01	0.01	#-nan	#-nan	#-nan
5S_rRNA	GLB1L3	GLB1L3	GLB1L3-002,GLB1L3-004,GLB1L3-008	11	134157600	134157713	74.45	0	0	0	0						#-nan	#-nan	#-nan
5S_rRNA	JAM3	JAM3	JAM3-001,JAM3-002,JAM3-004,JAM3-005,JAM3-008,JAM3-201	11	133939352	133939517	111.79	0.041	0.013	0	0						#-nan	#-nan	#-nan
5S_rRNA	JAM3	JAM3	JAM3-006	11	133994875	133995044	112.56	0.006	0	0.025	0	2	rs10894778,rs151151345	0.03	0.02	0.05	-0.01	1.88	1.53
5S_rRNA	KCNJ5	KCNJ5	KCNJ5-001,KCNJ5-003	11	128760948	128761075	82.68	0.017	0	0	0						#-nan	#-nan	#-nan
5S_rRNA	LINC00167,PRDM10	PRDM10-DT,PRDM10	LINC00167-002,PRDM10-001,PRDM10-003,PRDM10-005,PRDM10-009,PRDM10-010	11	129872043	129872214	116.69	0.033	0	0.019	0						#-nan	#-nan	#-nan
5S_rRNA	LINC00167,PRDM10	PRDM10-DT,PRDM10	LINC00167-002,PRDM10-001,PRDM10-003,PRDM10-005,PRDM10-009,PRDM10-010	11	129871729	129871839	75.76	0.033	0	0.019	0	2	rs111630992,rs4264162	0.04	0	0.02	-0.98	-0.42	-0.01
5S_rRNA	NCAPD3,VPS26B	NCAPD3,VPS26B	NCAPD3-001,NCAPD3-002,NCAPD3-003,NCAPD3-005,NCAPD3-006,NCAPD3-007,NCAPD3-008,NCAPD3-009,VPS26B-001,VPS26B-002,VPS26B-003,VPS26B-004	11	134094827	134094943	78.74	0.022	0.009	0.018	0.009	1	rs4937869	0.07	0.22	0.13	0.62	1.63	-0.51
5S_rRNA	NCAPD3,VPS26B	NCAPD3,VPS26B	NCAPD3-001,NCAPD3-002,NCAPD3-003,NCAPD3-005,NCAPD3-006,NCAPD3-007,NCAPD3-008,NCAPD3-009,VPS26B-001,VPS26B-002,VPS26B-003,VPS26B-004	11	134094841	134094997	104.92	0.022	0.009	0.018	0.009	1	rs4937869	0.07	0.22	0.13	0.62	1.63	-0.51
5S_rRNA	NFRKB	NFRKB	NFRKB-001,NFRKB-002,NFRKB-003,NFRKB-004,NFRKB-005,NFRKB-006,NFRKB-007,NFRKB-008,NFRKB-009,NFRKB-010,NFRKB-201	11	129765505	129765617	75.17	0	0.019	0.053	0.029	2	rs186289479,rs147901126	0.08	0.08	0.08	#-nan	#-nan	-0.2
5S_rRNA	NTM	NTM	NTM-001,NTM-003,NTM-006,NTM-007,NTM-008,NTM-015,NTM-016	11	131780607	131780697	63.47	0.012	0	0	0						#-nan	#-nan	#-nan
5S_rRNA	NTM	NTM	NTM-001,NTM-003,NTM-006,NTM-007,NTM-008,NTM-015,NTM-016	11	131780610	131780698	60.9	0.012	0	0	0						#-nan	#-nan	#-nan
5S_rRNA	OPCML	OPCML	OPCML-001,OPCML-002,OPCML-005,OPCML-201,OPCML-202(*)	11	132813657	132813873	149.45	0.014	0	0.01	0	2	rs117671974,rs76378551	0.02	0.06	0.03	-0.09	-0.93	0.18
5S_rRNA	RP11-121M22.1,ZBTB44	ZBTB44-DT,ZBTB44	RP11-121M22.1-002,RP11-121M22.1-003,RP11-121M22.1-004,ZBTB44-001,ZBTB44-002,ZBTB44-003,ZBTB44-201	11	130184352	130184447	64.46	0.009	0.018	0.018	0.008						#-nan	#-nan	#-nan
5S_rRNA	RP11-121M22.1,ZBTB44	ZBTB44-DT,ZBTB44	RP11-121M22.1-002,RP11-121M22.1-003,RP11-121M22.1-004,ZBTB44-001,ZBTB44-002,ZBTB44-003,ZBTB44-201	11	130184351	130184481	86.43	0.009	0.018	0.018	0.008						#-nan	#-nan	#-nan
5S_rRNA	RP11-121M22.1,ZBTB44	ZBTB44-DT,ZBTB44	RP11-121M22.1-002,RP11-121M22.1-003,RP11-121M22.1-004,ZBTB44-001,ZBTB44-002,ZBTB44-003,ZBTB44-201,ZBTB44-202(*)	11	130184361	130184483	82.82	0.009	0.018	0.018	0.008						#-nan	#-nan	#-nan
5S_rRNA	SNX19	SNX19	SNX19-001,SNX19-002,SNX19-003,SNX19-005,SNX19-006,SNX19-010,SNX19-201	11	130786383	130786476	63.65	0	0	0.011	0	1	rs144301229	0.01	#-nan	0.01	-0.9	#-nan	#-nan
5S_rRNA	ST14	ST14	ST14-001	11	130029719	130029824	69.95	0.031	0.01	0	0.01						#-nan	#-nan	#-nan
5S_rRNA	AC011313.1,C12orf75	AC011313.1,C12orf75	AC011313.1-201,C12orf75-001,C12orf75-003,C12orf75-005,C12orf75-006,C12orf75-008	12	105724477	105724763	190.95	0.006	0.008	0.008	0	1	.	0	0	0	-0.97	-0.9	#-nan
5S_rRNA	AC011313.1,C12orf75	AC011313.1,C12orf75	AC011313.1-201,C12orf75-001,C12orf75-003,C12orf75-005,C12orf75-006,C12orf75-008	12	105724425	105724552	85.22	0.006	0.008	0.008	0	1	rs139854423	0.03	#-nan	0.03	-0.63	#-nan	#-nan
5S_rRNA	AC011313.1,C12orf75	AC011313.1,C12orf75	AC011313.1-201,C12orf75-001,C12orf75-003,C12orf75-005,C12orf75-006,C12orf75-008,C12orf75-201(*)	12	105724650	105724806	107.23	0.006	0.008	0.008	0	1	.	0	0	0	-0.97	-0.9	#-nan
5S_rRNA	ACACB	ACACB	ACACB-002	12	109592368	109592467	66.91	0	0	0	0						#-nan	#-nan	#-nan
5S_rRNA	ACACB	ACACB	ACACB-008	12	109626101	109626240	97.44	0.035	0.007	0.023	0.007	3	rs73191118,rs2268401,rs185906137	0.11	0.07	0.11	0.41	2.64	1.85
5S_rRNA	ACSS3,LIN7A,MIR618	ACSS3,LIN7A,MIR618	ACSS3-007,LIN7A-001,LIN7A-002,LIN7A-003,MIR618-201	12	81330796	81330893	66.1	0.01	0	0	0						#-nan	#-nan	#-nan
5S_rRNA	ALDH1L2	ALDH1L2	ALDH1L2-001,ALDH1L2-002,ALDH1L2-004,ALDH1L2-201	12	105478248	105478422	116.18	0.018	0.006	0.012	0.006	2	rs7303961,rs7304175	0.02	0.02	0.04	0.16	-0.48	-0.56
5S_rRNA	ALX1	ALX1	ALX1-001	12	85674241	85674369	86.9	0.025	0	0	0						#-nan	#-nan	#-nan
5S_rRNA	AMDHD1,CCDC38	AMDHD1,CCDC38	AMDHD1-001,AMDHD1-002,CCDC38-001,CCDC38-002,CCDC38-004,CCDC38-005,CCDC38-006	12	96337057	96337150	63.76	0.011	0	0.012	0						#-nan	#-nan	#-nan
5S_rRNA	AMDHD1,CCDC38	AMDHD1,CCDC38	AMDHD1-001,AMDHD1-002,CCDC38-001,CCDC38-002,CCDC38-004,CCDC38-005,CCDC38-006	12	96337059	96337161	68.95	0.011	0	0.012	0						#-nan	#-nan	#-nan
5S_rRNA	AMDHD1,CCDC38	AMDHD1,CCDC38	AMDHD1-001,AMDHD1-002,CCDC38-001,CCDC38-002,CCDC38-004,CCDC38-005,CCDC38-006	12	96337058	96337156	67.48	0.011	0	0.012	0						#-nan	#-nan	#-nan
5S_rRNA	AMDHD1	AMDHD1	AMDHD1-004	12	96341345	96341463	80.38	10	0.009	0	0						#-nan	#-nan	#-nan
5S_rRNA	ANAPC7	ANAPC7	ANAPC7-009	12	110825044	110825190	99.14	10	0.051	0.111	0						#-nan	#-nan	#-nan
5S_rRNA	ANKRD13A,GIT2	ANKRD13A,GIT2	ANKRD13A-001,ANKRD13A-002,ANKRD13A-004,GIT2-001,GIT2-002,GIT2-004,GIT2-005,GIT2-006,GIT2-007,GIT2-008,GIT2-010,GIT2-011,GIT2-012,GIT2-201,GIT2-202,GIT2-203,GIT2-204,GIT2-205	12	110437263	110437359	66.78	0.009	0	0.011	0						#-nan	#-nan	#-nan
5S_rRNA	ANKRD13A,GIT2,RP11-837J7.3	ANKRD13A,GIT2,RP11-837J7.3	ANKRD13A-001,ANKRD13A-002,ANKRD13A-004,GIT2-001,GIT2-002,GIT2-004,GIT2-005,GIT2-006,GIT2-007,GIT2-008,GIT2-010,GIT2-011,GIT2-012,GIT2-201,GIT2-202,GIT2-203,GIT2-204,GIT2-205,RP11-837J7.3-001(*)	12	110437294	110437484	129.34	0.009	0	0.011	0						#-nan	#-nan	#-nan
5S_rRNA	ANKRD13A,GIT2	ANKRD13A,GIT2	ANKRD13A-001,ANKRD13A-002,ANKRD13A-004,GIT2-002,GIT2-004,GIT2-006,GIT2-007,GIT2-008,GIT2-010,GIT2-012,GIT2-201,GIT2-202,GIT2-203,GIT2-204,GIT2-205	12	110437436	110437557	82.42	0.009	0	0.011	0						#-nan	#-nan	#-nan
5S_rRNA	ANKS1B	ANKS1B	ANKS1B-001,ANKS1B-002,ANKS1B-003,ANKS1B-201	12	100378465	100378703	159.59	0.048	0	0	0						#-nan	#-nan	#-nan
5S_rRNA	ANKS1B	ANKS1B	ANKS1B-006,ANKS1B-010,ANKS1B-016,ANKS1B-024,ANKS1B-025,ANKS1B-026,ANKS1B-027,ANKS1B-028,ANKS1B-032,ANKS1B-033	12	99288671	99288899	153.16	0.041	0.004	0.009	0	2	rs140856498,rs182131	0.02	0.05	0.06	-0.51	#-nan	-0.45
5S_rRNA	ANKS1B	ANKS1B	ANKS1B-006,ANKS1B-010,ANKS1B-016,ANKS1B-024,ANKS1B-025,ANKS1B-026,ANKS1B-027,ANKS1B-028,ANKS1B-032,ANKS1B-033	12	99288653	99288831	118.59	0.041	0.004	0.009	0						#-nan	#-nan	#-nan
5S_rRNA	ANO4	ANO4	ANO4-003,ANO4-202	12	101111095	101111269	116.98	0.018	0.006	0.012	0.006	2	rs151022602,rs12310954	0	0.01	0.01	0.71	0.26	0.35
5S_rRNA	APAF1,IKBIP	APAF1,IKBIP	APAF1-001,APAF1-002,APAF1-003,APAF1-004,APAF1-005,APAF1-006,APAF1-007,APAF1-201,APAF1-202,APAF1-203,IKBIP-001,IKBIP-002,IKBIP-003,IKBIP-201	12	99039212	99039317	66.82	0.021	0	0.02	0						#-nan	#-nan	#-nan
5S_rRNA	APAF1,IKBIP	APAF1,IKBIP	APAF1-001,APAF1-002,APAF1-007,APAF1-201,APAF1-202,APAF1-203,IKBIP-001,IKBIP-002,IKBIP-003,IKBIP-201	12	99038350	99038452	69.97	0.021	0	0.02	0	1	rs142533643	0	0	0	#-nan	#-nan	0.6
5S_rRNA	APPL2,C12orf75	APPL2,C12orf75	APPL2-001,APPL2-002,APPL2-003,APPL2-004,APPL2-005,APPL2-006,C12orf75-004	12	105629562	105629715	104.45	0.014	0	0	0						#-nan	#-nan	#-nan
5S_rRNA	ARL1	ARL1	ARL1-001,ARL1-004,ARL1-005,ARL1-006,ARL1-007,ARL1-008,ARL1-009,ARL1-010,ARL1-011,ARL1-013	12	101801276	101801375	63.96	0.022	0.021	0.021	0	1	rs114823684	0.03	0.03	0.03	#-nan	#-nan	-0.64
5S_rRNA	ASCL4	ASCL4	ASCL4-001	12	108169057	108169169	76.3	0.009	0	0.019	0	1	rs78204295	0.05	0.06	0.05	#-nan	#-nan	-0.38
5S_rRNA	ATP2A2	ATP2A2	ATP2A2-001,ATP2A2-002,ATP2A2-003,ATP2A2-004,ATP2A2-201	12	110719167	110719360	135.24	0	0	0.005	0	1	rs3026433	0.15	0.01	0.16	0.76	#-nan	-0.9
5S_rRNA	ATP2B1,LINC00936	ATP2B1,ATP2B1-AS1	ATP2B1-001,ATP2B1-005,LINC00936-001	12	90102687	90102874	130.2	0.016	0.005	0.005	0	1	rs12369944	0.1	0.05	0.05	0.04	-0.42	#-nan
5S_rRNA	ATP2B1,LINC00936	ATP2B1,ATP2B1-AS1	ATP2B1-001,ATP2B1-005,LINC00936-001	12	90102692	90102891	137.45	0.016	0.005	0.005	0	1	rs12369944	0.1	0.05	0.05	0.04	-0.42	#-nan
5S_rRNA	ATXN2,RP11-686G8.2	ATXN2,ATXN2-AS	ATXN2-001,ATXN2-002,ATXN2-003,ATXN2-005,ATXN2-011,ATXN2-016,ATXN2-017,ATXN2-018,ATXN2-025,ATXN2-201,RP11-686G8.2-001	12	112036505	112036601	66.65	0.011	0	0	0						#-nan	#-nan	#-nan
5S_rRNA	ATXN2,RP11-686G8.2	ATXN2,ATXN2-AS	ATXN2-001,ATXN2-002,ATXN2-003,ATXN2-005,ATXN2-011,ATXN2-016,ATXN2-017,ATXN2-018,ATXN2-025,ATXN2-201,RP11-686G8.2-001	12	112036481	112036601	81.19	0.011	0	0	0						#-nan	#-nan	#-nan
5S_rRNA	ATXN2,RP11-686G8.2	ATXN2,ATXN2-AS	ATXN2-001,ATXN2-002,ATXN2-003,ATXN2-005,ATXN2-011,ATXN2-016,ATXN2-017,ATXN2-018,ATXN2-025,ATXN2-201,RP11-686G8.2-001	12	112036455	112036594	94.66	0.011	0	0	0						#-nan	#-nan	#-nan
5S_rRNA	ATXN2,RP11-686G8.2	ATXN2,ATXN2-AS	ATXN2-001,ATXN2-002,ATXN2-003,ATXN2-005,ATXN2-011,ATXN2-016,ATXN2-017,ATXN2-018,ATXN2-025,ATXN2-201,RP11-686G8.2-001,ATXN2-202(*)	12	112036509	112036621	76.59	0.011	0	0	0						#-nan	#-nan	#-nan
5S_rRNA	BTG1,C12orf79,RP11-796E2.4	BTG1,LINC01619,BTG1-DT	BTG1-001,BTG1-003,C12orf79-001,C12orf79-002,C12orf79-003,C12orf79-004,C12orf79-006,C12orf79-009,RP11-796E2.4-001,RP11-796E2.4-002,RP11-796E2.4-003(*)	12	92539047	92539141	63.24	0.022	0.013	0	0.013						#-nan	#-nan	#-nan
5S_rRNA	C12orf23,RP11-412D9.4	C12orf23,TMEM263-DT	C12orf23-001,C12orf23-002,C12orf23-004,C12orf23-005,C12orf23-006,C12orf23-007,RP11-412D9.4-001	12	107349531	107349666	92.21	0.014	0	0.007	0						#-nan	#-nan	#-nan
5S_rRNA	C12orf23,RP11-412D9.4	C12orf23,TMEM263-DT	C12orf23-001,C12orf23-002,C12orf23-004,C12orf23-005,C12orf23-006,C12orf23-007,RP11-412D9.4-001	12	107349513	107349662	101.18	0.014	0	0.007	0						#-nan	#-nan	#-nan
5S_rRNA	C12orf42	C12orf42	C12orf42-001,C12orf42-002,C12orf42-003,C12orf42-004,C12orf42-005,C12orf42-006,C12orf42-007,C12orf42-008,C12orf42-009,C12orf42-201,C12orf42-202	12	103889435	103889542	71.56	0.028	0	0	0						#-nan	#-nan	#-nan
5S_rRNA	C12orf42	C12orf42	C12orf42-001,C12orf42-002,C12orf42-003,C12orf42-004,C12orf42-005,C12orf42-006,C12orf42-007,C12orf42-008,C12orf42-009,C12orf42-201,C12orf42-202	12	103889164	103889281	77.99	0.028	0	0	0						#-nan	#-nan	#-nan
5S_rRNA	C12orf45	NOPCHAP1	C12orf45-001,C12orf45-002,C12orf45-201(*)	12	105380265	105380400	92.21	0.007	0	0.007	0	1	rs7964906	0.17	0.07	0.09	0.21	0.93	1.8
5S_rRNA	C12orf55	C12orf55	C12orf55-006	12	96941539	96941645	71.4	0	0	0	0	1	rs188670662	0	#-nan	0	-0.97	#-nan	#-nan
5S_rRNA	C12orf73	UQCC6	C12orf73-001,C12orf73-002,C12orf73-003,C12orf73-006,C12orf73-007,C12orf73-008,C12orf73-009,C12orf73-010,C12orf73-011	12	104350922	104351036	74.84	0.04	0	0.019	0	2	rs2293619,rs2293620	0.07	0.13	0.14	-0.5	1.3	0.68
5S_rRNA	C12orf76	C12orf76	C12orf76-003,C12orf76-005,C12orf76-006,C12orf76-008,C12orf76-009	12	110486131	110486219	60.86	0	0	0.012	0	1	rs191281727	0.01	#-nan	0.01	-0.9	#-nan	#-nan
5S_rRNA	CCDC41	CCDC41	CCDC41-001,CCDC41-002,CCDC41-003,CCDC41-004,CCDC41-013,CCDC41-201	12	94853771	94853865	63.11	0	0	0	0						#-nan	#-nan	#-nan
5S_rRNA	CCDC59,METTL25	CCDC59,METTL25	CCDC59-001,CCDC59-002,CCDC59-003,CCDC59-004,CCDC59-005,CCDC59-006,CCDC59-007,METTL25-001,METTL25-002,METTL25-003,METTL25-004,METTL25-005,METTL25-007	12	82752535	82752632	66.1	0.032	0	0.049	0	3	rs113882703,rs201472175,rs112592060	0.03	0.01	0.04	-0.59	-1.29	-0.94
5S_rRNA	CCER1	CCER1	CCER1-001,CCER1-002,CCER1-004	12	91347992	91348115	79.56	0.017	0	0.022	0	2	rs115451948,rs201558156	0.17	0.17	0.17	#-nan	-0.96	0.68
5S_rRNA	CCER1	CCER1	CCER1-001,CCER1-002,CCER1-004	12	91347485	91347583	67.48	0.017	0	0.022	0						#-nan	#-nan	#-nan
5S_rRNA	CDK17	CDK17	CDK17-001,CDK17-002,CDK17-003,CDK17-004,CDK17-005,CDK17-006	12	96793698	96793905	140.35	0.005	0	0	0						#-nan	#-nan	#-nan
5S_rRNA	CDK17	CDK17	CDK17-001,CDK17-002,CDK17-003,CDK17-004,CDK17-005,CDK17-006	12	96793699	96793905	137.89	0.005	0	0	0						#-nan	#-nan	#-nan
5S_rRNA	CHPT1	CHPT1	CHPT1-001,CHPT1-002,CHPT1-003,CHPT1-004,CHPT1-005,CHPT1-006,CHPT1-007	12	102091411	102091699	196.25	0.019	0	0.007	0	2	rs11110965,rs143603461	0.01	0.01	0.02	-0.65	-1	-0.57
5S_rRNA	CHPT1	CHPT1	CHPT1-001,CHPT1-002,CHPT1-003,CHPT1-004,CHPT1-005,CHPT1-006,CHPT1-007	12	102091411	102091700	195.84	0.019	0	0.007	0	2	rs11110965,rs143603461	0.01	0.01	0.02	-0.65	-1	-0.57
5S_rRNA	CHPT1,RP11-285E23.2	CHPT1,RP11-285E23.2	CHPT1-001,CHPT1-002,CHPT1-003,CHPT1-004,CHPT1-005,CHPT1-006,CHPT1-007,RP11-285E23.2-001(*)	12	102091413	102091707	200.33	0.019	0	0.007	0	2	rs11110965,rs143603461	0.01	0.01	0.02	-0.65	-1	-0.57
5S_rRNA	CHST11	CHST11	CHST11-001,CHST11-002,CHST11-006,CHST11-007	12	104850833	104850938	71.81	0	0	0	0						#-nan	#-nan	#-nan
5S_rRNA	CHST11	CHST11	CHST11-004	12	104846986	104847094	74.93	0.01	0.019	0.03	0.019	3	rs7489168,rs61937667,rs77178221	0.02	0.11	0.06	#-nan	#-nan	#-nan
5S_rRNA	CKAP4,RP11-651L5.2	CKAP4,RP11-651L5.2	CKAP4-001,RP11-651L5.2-001	12	106641903	106642001	66.5	0	0	0	0						#-nan	#-nan	#-nan
5S_rRNA	CKAP4,RP11-651L5.2,RP11-651L5.3	CKAP4,RP11-651L5.2,RP11-651L5.3	CKAP4-001,RP11-651L5.2-001,RP11-651L5.3-001(*)	12	106641906	106642013	72.62	0	0	0	0						#-nan	#-nan	#-nan
5S_rRNA	CMKLR1	CMKLR1	CMKLR1-001,CMKLR1-002,CMKLR1-005,CMKLR1-201	12	108733136	108733254	77.22	0.009	0	0.018	0	1	rs73403360	0.13	0.14	0.14	#-nan	#-nan	0.4
5S_rRNA	CORO1C	CORO1C	CORO1C-001,CORO1C-002,CORO1C-003,CORO1C-007,CORO1C-010,CORO1C-011,CORO1C-012,CORO1C-013,CORO1C-014	12	109125095	109125205	74.66	0.01	0.01	0.01	0.01	1	rs11114043	0.02	#-nan	0.03	-0.7	#-nan	#-nan
5S_rRNA	CRY1,RP11-797M17.1	CRY1,RP11-797M17.1	CRY1-001,CRY1-003,RP11-797M17.1-001	12	107487240	107487359	80.78	0	0	0	0						#-nan	#-nan	#-nan
5S_rRNA	CSRP2,RP11-461F16.3	CSRP2,RP11-461F16.3	CSRP2-001,CSRP2-002,CSRP2-004,CSRP2-005,CSRP2-006,CSRP2-007,RP11-461F16.3-001	12	77272866	77272996	86.43	0.008	0	0	0						#-nan	#-nan	#-nan
5S_rRNA	CSRP2,RP11-461F16.3	CSRP2,RP11-461F16.3	CSRP2-001,CSRP2-002,CSRP2-004,CSRP2-005,CSRP2-006,CSRP2-007,RP11-461F16.3-001	12	77272872	77272997	84.86	0.008	0	0	0						#-nan	#-nan	#-nan
5S_rRNA	CUX2	CUX2	CUX2-001	12	111471709	111471856	100.37	0.007	0	0.007	0						#-nan	#-nan	#-nan
5S_rRNA	DAO,SSH1	DAO,SSH1	DAO-006,DAO-007,SSH1-001,SSH1-002,SSH1-005,SSH1-201	12	109251150	109251421	180.9	0.049	0	0.008	0						#-nan	#-nan	#-nan
5S_rRNA	DAO,SSH1	DAO,SSH1	DAO-006,DAO-007,SSH1-001,SSH1-002,SSH1-005,SSH1-201	12	109253637	109253759	76.73	0.049	0	0.008	0						#-nan	#-nan	#-nan
5S_rRNA	DEPDC4,SCYL2	DEPDC4,SCYL2	DEPDC4-001,DEPDC4-002,DEPDC4-003,DEPDC4-004,DEPDC4-005,DEPDC4-006,DEPDC4-007,SCYL2-001,SCYL2-002,SCYL2-004,SCYL2-006	12	100661195	100661374	118.01	0.054	0.013	0.047	0	4	rs7316039,rs143748763,rs59031776,rs142547279	0	0.19	0.11	0.55	-0.31	-0.08
5S_rRNA	DEPDC4,SCYL2	DEPDC4,SCYL2	DEPDC4-001,DEPDC4-002,DEPDC4-003,DEPDC4-004,DEPDC4-005,DEPDC4-006,DEPDC4-007,SCYL2-001,SCYL2-002,SCYL2-004,SCYL2-006	12	100661291	100661398	71.56	0.054	0.013	0.047	0	1	rs143748763	0	0.04	0.02	-0.7	#-nan	-0.81
5S_rRNA	DLEU2_6.1,RP11-693J15.6	DLEU2_6.1,RP11-693J15.6	DLEU2_6.1-201(*),RP11-693J15.6-001(*)	12	92027920	92028119	133.46	0	0	0	0	3	rs111902186,rs115538886,rs11106220	0.16	0.19	0.16	-0.7	#-nan	0.25
5S_rRNA	DRAM1	DRAM1	DRAM1-001,DRAM1-002,DRAM1-003,DRAM1-004	12	102271380	102271518	93.43	0	0	0.015	0	2	rs57567110,rs7313338	0.07	0.14	0.14	-0.97	0.85	-0.67
5S_rRNA	DUSP6	DUSP6	DUSP6-001,DUSP6-002,DUSP6-003,DUSP6-004,DUSP6-005	12	89747479	89747573	63.24	0	0	0.011	0	1	rs114117218	0.13	0.18	0.14	-0.83	#-nan	0.68
5S_rRNA	E2F7	E2F7	E2F7-001,E2F7-002,E2F7-003,E2F7-004,E2F7-005	12	77459229	77459330	67.54	0.01	0	0.01	0	1	rs35834163	0.1	#-nan	0.1	0.1	#-nan	#-nan
5S_rRNA	EEA1	EEA1	EEA1-001,EEA1-002,EEA1-003,EEA1-004	12	93322583	93322731	99.96	0.014	0	0	0						#-nan	#-nan	#-nan
5S_rRNA	ELK3	ELK3	ELK3-001,ELK3-002,ELK3-003,ELK3-004	12	96588623	96588810	126.48	0.011	0	0	0						#-nan	#-nan	#-nan
5S_rRNA	ERP29,TMEM116	ERP29,TMEM116	ERP29-001,ERP29-002,ERP29-003,ERP29-004,TMEM116-001,TMEM116-002,TMEM116-003,TMEM116-004,TMEM116-005,TMEM116-006,TMEM116-007,TMEM116-008,TMEM116-011,TMEM116-016,TMEM116-017,TMEM116-018,TMEM116-201,TMEM116-202	12	112451081	112451198	76.44	0.019	0.021	0.021	0	1	rs181521612	0.01	0.01	0.01	#-nan	#-nan	-0.83
5S_rRNA	FAM216A,GPN3	FAM216A,GPN3	FAM216A-001,FAM216A-002,FAM216A-003,FAM216A-004,GPN3-001,GPN3-002,GPN3-005,GPN3-007,GPN3-010,GPN3-011,GPN3-012,GPN3-201	12	110906700	110906792	62.42	0.017	0	0	0						#-nan	#-nan	#-nan
5S_rRNA	FAM222A	FAM222A	FAM222A-001,FAM222A-003	12	110151698	110151815	82.64	0.018	0	0	0						#-nan	#-nan	#-nan
5S_rRNA	FGD6,VEZT	FGD6,VEZT	FGD6-001,FGD6-002,FGD6-003,FGD6-004,VEZT-001,VEZT-002,VEZT-003,VEZT-004,VEZT-005,VEZT-006,VEZT-007,VEZT-008,VEZT-009,VEZT-012,VEZT-013,VEZT-014,VEZT-015,VEZT-016,VEZT-017,VEZT-018,VEZT-019,VEZT-020,VEZT-021,VEZT-022,VEZT-023,VEZT-024,VEZT-025,VEZT-026,VEZT-027,VEZT-028,VEZT-029,VEZT-030,VEZT-031,VEZT-032,VEZT-033,VEZT-034,VEZT-035,VEZT-039,VEZT-040,VEZT-201	12	95611214	95611353	92.46	0.015	0.021	0.021	0	1	rs183957980	0	#-nan	0	-0.97	#-nan	#-nan
5S_rRNA	FGD6,VEZT	FGD6,VEZT	FGD6-001,FGD6-002,FGD6-003,FGD6-004,VEZT-001,VEZT-002,VEZT-003,VEZT-004,VEZT-005,VEZT-006,VEZT-007,VEZT-008,VEZT-009,VEZT-012,VEZT-013,VEZT-014,VEZT-015,VEZT-016,VEZT-017,VEZT-018,VEZT-019,VEZT-020,VEZT-021,VEZT-022,VEZT-023,VEZT-024,VEZT-025,VEZT-026,VEZT-027,VEZT-028,VEZT-029,VEZT-030,VEZT-031,VEZT-032,VEZT-033,VEZT-034,VEZT-035,VEZT-039,VEZT-040,VEZT-201	12	95611206	95611351	96.48	0.015	0.021	0.021	0	1	rs183957980	0	#-nan	0	-0.97	#-nan	#-nan
5S_rRNA	FOXN4	FOXN4	FOXN4-001,FOXN4-002	12	109747591	109747783	130.97	0.028	0.016	0	0						#-nan	#-nan	#-nan
5S_rRNA	GALNT4,POC1B,POC1B-GALNT4,RP11-734K2.4	GALNT4,POC1B,POC1B-GALNT4,POC1B-AS1	GALNT4-001,GALNT4-201,POC1B-001,POC1B-002,POC1B-005,POC1B-006,POC1B-007,POC1B-009,POC1B-010,POC1B-011,POC1B-012,POC1B-013,POC1B-202,POC1B-GALNT4-001,RP11-734K2.4-001,POC1B-GALNT4-002(*)	12	89919495	89919598	69.14	0.021	0.01	0.01	0.01	1	rs10777184	0.04	0.02	0.01	0.47	0.2	-0.38
5S_rRNA	GAS2L3	GAS2L3	GAS2L3-001,GAS2L3-002,GAS2L3-004,GAS2L3-005	12	100967355	100967493	94.25	0.016	0	0	0						#-nan	#-nan	#-nan
5S_rRNA	GAS2L3	GAS2L3	GAS2L3-001,GAS2L3-002,GAS2L3-004,GAS2L3-005	12	100967359	100967494	92.21	0.016	0	0	0						#-nan	#-nan	#-nan
5S_rRNA	GLT8D2,HCFC2	GLT8D2,HCFC2	GLT8D2-001,HCFC2-001,HCFC2-002,HCFC2-004	12	104458515	104458657	93.06	0.015	0	0.007	0	1	rs199952927	0.02	0.02	0.02	#-nan	#-nan	-0.57
5S_rRNA	GLT8D2,HCFC2	GLT8D2,HCFC2	GLT8D2-001,HCFC2-001,HCFC2-002,HCFC2-004	12	104458510	104458635	82.37	0.015	0	0.007	0	1	rs199952927	0.02	0.02	0.02	#-nan	#-nan	-0.57
5S_rRNA	GNPTAB	GNPTAB	GNPTAB-001,GNPTAB-002,GNPTAB-003,GNPTAB-009	12	102224515	102224720	139.54	0.04	0	0.005	0	1	rs140600142	0.03	0.06	0.03	0.26	0.57	-0.51
5S_rRNA	HVCN1	HVCN1	HVCN1-001,HVCN1-002,HVCN1-003,HVCN1-004,HVCN1-005,HVCN1-007	12	111126889	111126993	69.55	0.01	0	0	0						#-nan	#-nan	#-nan
5S_rRNA	IFT81	IFT81	IFT81-001,IFT81-002,IFT81-003,IFT81-004,IFT81-008	12	110561992	110562098	70.35	0.023	0	0	0						#-nan	#-nan	#-nan
5S_rRNA	IFT81	IFT81	IFT81-001,IFT81-002,IFT81-003,IFT81-004,IFT81-008	12	110561992	110562097	70.99	0.023	0	0	0						#-nan	#-nan	#-nan
5S_rRNA	ISCU,SART3	ISCU,SART3	ISCU-001,ISCU-002,ISCU-003,ISCU-004,ISCU-005,ISCU-006,ISCU-007,ISCU-008,ISCU-009,ISCU-012,ISCU-013,ISCU-201,SART3-001,SART3-003,SART3-004,SART3-005,SART3-006,SART3-007,SART3-017	12	108956350	108956507	108.47	0.014	0.014	0.046	0.014	6	rs2287554,rs2287555,rs11837563,rs10778647,rs142514490,rs10778648	0.23	0.11	0.17	1.57	0.28	0.27
5S_rRNA	KCNC2	KCNC2	KCNC2-007	12	75532665	75532762	64.32	0.053	0.011	0.034	0	2	rs2446324,rs2471661	0.39	0.34	0.26	1.31	0.69	-0.37
5S_rRNA	KIAA1033,RP11-61E11.2	WASHC4,RP11-61E11.2	KIAA1033-001,KIAA1033-002,KIAA1033-003,KIAA1033-004,KIAA1033-012,RP11-61E11.2-001	12	105501368	105501493	83.62	0.019	0	0	0						#-nan	#-nan	#-nan
5S_rRNA	KIAA1033,RP11-61E11.2	WASHC4,RP11-61E11.2	KIAA1033-001,KIAA1033-002,KIAA1033-003,KIAA1033-004,KIAA1033-012,RP11-61E11.2-001,KIAA1033-201(*)	12	105501364	105501479	76.38	0.019	0	0	0						#-nan	#-nan	#-nan
5S_rRNA	LTA4H	LTA4H	LTA4H-001,LTA4H-004,LTA4H-007	12	96429024	96429123	64.74	0.022	0	0.01	0						#-nan	#-nan	#-nan
5S_rRNA	MAPKAPK5,MAPKAPK5-AS1	MAPKAPK5,MAPKAPK5-AS1	MAPKAPK5-001,MAPKAPK5-002,MAPKAPK5-003,MAPKAPK5-004,MAPKAPK5-005,MAPKAPK5-006,MAPKAPK5-010,MAPKAPK5-AS1-001,MAPKAPK5-AS1-002,MAPKAPK5-AS1-003,MAPKAPK5-AS1-004,MAPKAPK5-AS1-005,MAPKAPK5-AS1-010,MAPKAPK5-AS1-011	12	112280240	112280402	112.19	0.019	0	0.006	0	1	rs75241782	0.04	0.47	0.5	#-nan	1.91	-0.51
5S_rRNA	MGAT4C,RP11-202H2.1	MGAT4C,RP11-202H2.1	MGAT4C-011,MGAT4C-012,RP11-202H2.1-001	12	87233437	87233564	85.22	10	0.026	0.026	0	2	rs188928196,.	0.05	0.06	0.05	1.79	1.6	-0.83
5S_rRNA	NAA25	NAA25	NAA25-001,NAA25-002,NAA25-003,NAA25-004,NAA25-005,NAA25-006	12	112546355	112546457	67.94	0	0	0	0						#-nan	#-nan	#-nan
5S_rRNA	NAP1L1	NAP1L1	NAP1L1-001,NAP1L1-004,NAP1L1-005,NAP1L1-006,NAP1L1-007,NAP1L1-008,NAP1L1-009,NAP1L1-010,NAP1L1-011,NAP1L1-012,NAP1L1-016,NAP1L1-017,NAP1L1-018,NAP1L1-019,NAP1L1-020,NAP1L1-021,NAP1L1-022,NAP1L1-023,NAP1L1-024	12	76478136	76478250	73.71	0	0	0.009	0						#-nan	#-nan	#-nan
5S_rRNA	NAP1L1	NAP1L1	NAP1L1-001,NAP1L1-004,NAP1L1-005,NAP1L1-006,NAP1L1-007,NAP1L1-008,NAP1L1-009,NAP1L1-010,NAP1L1-011,NAP1L1-012,NAP1L1-016,NAP1L1-017,NAP1L1-018,NAP1L1-019,NAP1L1-020,NAP1L1-021,NAP1L1-022,NAP1L1-023,NAP1L1-024	12	76478138	76478258	78.8	0	0	0.009	0						#-nan	#-nan	#-nan
5S_rRNA	NAV3	NAV3	NAV3-009,NAV3-010	12	78357713	78357851	91.48	0.18	0	0.008	0	1	rs61936161	0.09	0.18	0.1	1.77	1.96	0.73
5S_rRNA	NEDD1	NEDD1	NEDD1-001,NEDD1-002,NEDD1-003,NEDD1-004,NEDD1-006,NEDD1-007,NEDD1-008,NEDD1-009,NEDD1-010,NEDD1-011,NEDD1-012,NEDD1-013	12	97301085	97301253	112.16	0.012	0	0.006	0	1	rs112622130	0.17	0.18	0.17	#-nan	#-nan	0.68
5S_rRNA	NFYB	NFYB	NFYB-001,NFYB-002,NFYB-003,NFYB-004	12	104531417	104531714	204.52	0.018	0	0	0						#-nan	#-nan	#-nan
5S_rRNA	NT5DC3,RP11-650K20.3	NT5DC3,RP11-650K20.3	NT5DC3-001,RP11-650K20.3-001	12	104234822	104234959	91.66	0	0	0	0						#-nan	#-nan	#-nan
5S_rRNA	NT5DC3,RP11-650K20.3	NT5DC3,RP11-650K20.3	NT5DC3-001,RP11-650K20.3-001	12	104234818	104234942	83.21	0	0	0	0						#-nan	#-nan	#-nan
5S_rRNA	NTN4	NTN4	NTN4-001,NTN4-002,NTN4-003,NTN4-004,NTN4-005	12	96184630	96184807	120.77	0.006	0.006	0	0						#-nan	#-nan	#-nan
5S_rRNA	NUAK1	NUAK1	NUAK1-001	12	106532561	106532653	64.26	0	0	0	0						#-nan	#-nan	#-nan
5S_rRNA	NUDT4,RP11-486A14.2	NUDT4,RP11-486A14.2	NUDT4-001,NUDT4-002,NUDT4-003,NUDT4-004,NUDT4-006,NUDT4-007,NUDT4-008,RP11-486A14.2-001,RP11-486A14.2-002,RP11-486A14.2-003	12	93771921	93772056	91.39	0.016	0	0	0						#-nan	#-nan	#-nan
5S_rRNA	PAWR,RP11-530C5.1	PAWR,PPP1R12A-AS2	PAWR-001,PAWR-003,PAWR-004,PAWR-005,PAWR-006,RP11-530C5.1-001	12	80083692	80083891	137.45	0	0	0.008	0	1	rs8176805	0.78	0.47	0.56	-0.97	1.14	0.94
5S_rRNA	PAWR,RP11-530C5.1	PAWR,PPP1R12A-AS2	PAWR-001,PAWR-003,PAWR-004,PAWR-005,PAWR-006,RP11-530C5.1-001,PAWR-002(*),PAWR-008(*)	12	80083705	80083842	94.39	0	0	0.008	0	1	rs8176805	0.78	0.47	0.56	-0.97	1.14	0.94
5S_rRNA	PHLDA1,RP11-290L1.2	PHLDA1,PHLDA1-DT	PHLDA1-003,RP11-290L1.2-001,PHLDA1-201(*)	12	76425161	76425287	84.02	0	0	0	0						#-nan	#-nan	#-nan
5S_rRNA	PHLDA1,RP11-290L1.2,RP11-290L1.3	PHLDA1,PHLDA1-DT,PHLDA1-AS1	PHLDA1-003,RP11-290L1.2-001,RP11-290L1.3-001(*)	12	76425155	76425260	70.75	0	0	0	0						#-nan	#-nan	#-nan
5S_rRNA	PLEKHG7	PLEKHG7	PLEKHG7-001	12	93131441	93131545	68.51	0.093	0.02	0.093	0						#-nan	#-nan	#-nan
5S_rRNA	PLXNC1	PLXNC1	PLXNC1-001,PLXNC1-011	12	94541823	94541912	60.38	0.024	0.021	0.021	0	2	rs7299099,rs180827253	0.57	0.34	0.33	1.74	0.82	-0.64
5S_rRNA	PPP1CC,RP11-481J8.3	PPP1CC,RP11-481J8.3	PPP1CC-001,PPP1CC-002,PPP1CC-003,PPP1CC-009,PPP1CC-010,PPP1CC-011(*),RP11-481J8.3-001(*)	12	111180538	111180647	69.12	0.04	0	0.009	0.01						#-nan	#-nan	#-nan
5S_rRNA	PPP1R12A,RP11-84G21.1	PPP1R12A,PPP1R12A-AS1	PPP1R12A-001,PPP1R12A-002,PPP1R12A-003,PPP1R12A-004,PPP1R12A-008,PPP1R12A-201,RP11-84G21.1-001	12	80329008	80329105	67.07	0.065	0	0	0						#-nan	#-nan	#-nan
5S_rRNA	PPTC7	PPTC7	PPTC7-001	12	111020876	111021002	85.27	0	0	0	0						#-nan	#-nan	#-nan
5S_rRNA	PRDM4	PRDM4	PRDM4-001,PRDM4-002,PRDM4-003,PRDM4-004	12	108154894	108154989	63.52	0.011	0.021	0.021	0	2	rs11113466,rs71454708	0.41	0.1	0.28	0.6	0.15	#-nan
5S_rRNA	RAB21	RAB21	RAB21-001	12	72148739	72148909	113.77	0.006	0	0.006	0	1	rs190327770	0.06	0.07	0.07	#-nan	#-nan	-0.26
5S_rRNA	RFX4	RFX4	RFX4-002,RFX4-004,RFX4-008,RFX4-009	12	106976894	106976986	62.42	0.013	0	0.013	0						#-nan	#-nan	#-nan
5S_rRNA	RIC8B,RP11-144F15.1	RIC8B,RP11-144F15.1	RIC8B-001,RIC8B-002,RIC8B-003,RIC8B-005,RIC8B-006,RIC8B-007,RIC8B-008,RIC8B-009,RIC8B-012,RP11-144F15.1-001,RP11-144F15.1-002	12	107168443	107168542	67.73	0	0	0	0						#-nan	#-nan	#-nan
5S_rRNA	RIC8B,RP11-144F15.1	RIC8B,RP11-144F15.1	RIC8B-001,RIC8B-002,RIC8B-003,RIC8B-005,RIC8B-006,RIC8B-007,RIC8B-008,RIC8B-009,RIC8B-012,RP11-144F15.1-001,RP11-144F15.1-002	12	107168432	107168546	75.98	0	0	0	0						#-nan	#-nan	#-nan
5S_rRNA	RN7SKP172	RN7SKP172	RN7SKP172-201	12	76708294	76708474	117.39	0.086	0.082	0.13	0	7	.,.,.,.,.,.,.	0.1	0.16	0.09	1.23	1.11	1.16
5S_rRNA	RN7SL793P	RN7SL793P	RN7SL793P-201	12	102611749	102611867	79.19	0.04	0	0.018	0	1	rs113281963	0.04	0.07	0.03	0.04	0.44	-0.7
5S_rRNA	RNU6-1329P	RNU6-1329P	RNU6-1329P-201	12	93344414	93344505	60.19	0	0	0.012	0	2	.,rs113338181	0.05	0.35	0.22	0.47	#-nan	1.61
5S_rRNA	RP11-175P13.2,UHRF1BP1L	BLTP3B-DT,BLTP3B	RP11-175P13.2-001,UHRF1BP1L-001,UHRF1BP1L-002,UHRF1BP1L-004	12	100536096	100536309	145.25	0.01	0	0.01	0	2	rs116747009,rs181867705	0.01	0.01	0.01	#-nan	#-nan	-1.12
5S_rRNA	RP11-341G23.4	RP11-341G23.4	RP11-341G23.4-001,RP11-341G23.4-002	12	104162314	104162411	60.48	0.428	0.034	0.01	0.022						#-nan	#-nan	#-nan
5S_rRNA	RP11-541G9.1	RP11-541G9.1	RP11-541G9.1-001	12	97379418	97379532	75.98	0	0.009	0.018	0	1	rs142901883	#-nan	0.01	0.01	#-nan	-0.83	#-nan
5S_rRNA	RP11-81H3.2	LINC02882	RP11-81H3.2-001,RP11-81H3.2-002,RP11-81H3.2-003,RP11-81H3.2-004	12	74686195	74686301	70.09	0	0	0.02	0	1	rs180734471	#-nan	0	0	#-nan	-0.9	#-nan
5S_rRNA	RP11-81H3.2	LINC02882	RP11-81H3.2-005	12	74796998	74797107	73.16	0.02	0	0	0						#-nan	#-nan	#-nan
5S_rRNA	RP1-34H18.1	RP1-34H18.1	RP1-34H18.1-001	12	77718650	77718798	100.78	0.015	0	0	0						#-nan	#-nan	#-nan
5S_rRNA	SCYL2	SCYL2	SCYL2-009	12	100716040	100716147	71.56	10	0.009	0.03	0						#-nan	#-nan	#-nan
5S_rRNA	SLC41A2	SLC41A2	SLC41A2-003,SLC41A2-004,SLC41A2-005,SLC41A2-006,SLC41A2-007,SLC41A2-008	12	105351670	105351779	74.26	0.031	0.02	0.02	0.02						#-nan	#-nan	#-nan
5S_rRNA	SLC5A8	SLC5A8	SLC5A8-001	12	101603639	101603802	110.16	0.013	0.021	0.021	0	2	rs112777254,rs76946257	0.28	0.29	0.29	#-nan	#-nan	1.9
5S_rRNA	SLC6A15	SLC6A15	SLC6A15-001,SLC6A15-002,SLC6A15-003,SLC6A15-005,SLC6A15-006,SLC6A15-007,SLC6A15-010,SLC6A15-011	12	85306530	85306698	108.81	0	0	0.019	0	2	rs11831581,.	0.18	0.18	0.18	#-nan	-0.9	0.81
5S_rRNA	SOCS2,SOCS2-AS1	SOCS2,SOCS2-AS1	SOCS2-001,SOCS2-002,SOCS2-005,SOCS2-006,SOCS2-007,SOCS2-008,SOCS2-009,SOCS2-010,SOCS2-011,SOCS2-AS1-001,SOCS2-AS1-002,SOCS2-AS1-004,SOCS2-201(*)	12	93964914	93965005	62.93	0.012	0	0.022	0	1	rs186142469	0.01	0.01	0.01	#-nan	#-nan	-0.83
5S_rRNA	SOCS2,SOCS2-AS1	SOCS2,SOCS2-AS1	SOCS2-005,SOCS2-009,SOCS2-011,SOCS2-012,SOCS2-013,SOCS2-AS1-001,SOCS2-AS1-002,SOCS2-AS1-004	12	93966728	93966837	72.36	0.012	0	0.022	0						#-nan	#-nan	#-nan
5S_rRNA	SOCS2,SOCS2-AS1	SOCS2,SOCS2-AS1	SOCS2-005,SOCS2-009,SOCS2-011,SOCS2-012,SOCS2-013,SOCS2-AS1-001,SOCS2-AS1-002,SOCS2-AS1-004	12	93966740	93966839	67.73	0.012	0	0.022	0						#-nan	#-nan	#-nan
5S_rRNA	TCTN1	TCTN1	TCTN1-001,TCTN1-002,TCTN1-003,TCTN1-004,TCTN1-005,TCTN1-006,TCTN1-009,TCTN1-010,TCTN1-011,TCTN1-012,TCTN1-019,TCTN1-021,TCTN1-024,TCTN1-025,TCTN1-026,TCTN1-027,TCTN1-201,TCTN1-202(*)	12	111051964	111052055	61.2	0.023	0	0	0						#-nan	#-nan	#-nan
5S_rRNA	TMCC3	TMCC3	TMCC3-001	12	95043673	95043885	144.02	0	0	0.01	0	2	rs141576172,rs147029622	#-nan	0	0	#-nan	-1.29	#-nan
5S_rRNA	TMEM19	TMEM19	TMEM19-001,TMEM19-003,TMEM19-004	12	72079822	72079974	100.19	0.007	0	0	0						#-nan	#-nan	#-nan
5S_rRNA	TRHDE,TRHDE-AS1	TRHDE,TRHDE-AS1	TRHDE-001,TRHDE-002,TRHDE-003,TRHDE-AS1-001,TRHDE-AS1-005	12	72666848	72666958	73.57	0.01	0.007	0.007	0.007						#-nan	#-nan	#-nan
5S_rRNA	TRHDE,TRHDE-AS1	TRHDE,TRHDE-AS1	TRHDE-001,TRHDE-002,TRHDE-003,TRHDE-AS1-001,TRHDE-AS1-005	12	72666361	72666497	91.25	0.01	0.007	0.007	0.007	2	.,rs6582089	0.03	0.17	0.09	2.25	0.52	2.09
5S_rRNA	TRPV4,MIR4497	TRPV4,MIR4497	TRPV4-001,TRPV4-007,TRPV4-008,TRPV4-201,TRPV4-202,MIR4497-201(*)	12	110271239	110271353	82.78	0.018	0.009	0.019	0.009	2	rs7303725,.	0.33	0.6	0.39	1.57	1.99	-1.08
5S_rRNA	UBE2N	UBE2N	UBE2N-001,UBE2N-002,UBE2N-003,UBE2N-004,UBE2N-005	12	93835761	93835867	73.28	0.02	0	0.01	0	1	rs201709668	0.02	0.02	0.04	0.32	-0.96	2.13
5S_rRNA	USP44	USP44	USP44-002,USP44-004,USP44-005,USP44-006,USP44-007	12	95942365	95942480	76.38	0.028	0.021	0.021	0	3	rs7310029,rs138241697,rs11108102	0.29	0.06	0.29	0.16	1.35	1.45
5S_rRNA	WSCD2	WSCD2	WSCD2-001,WSCD2-002,WSCD2-004,WSCD2-005,WSCD2-006,WSCD2-007,WSCD2-008,WSCD2-009,WSCD2-010,WSCD2-201	12	108523198	108523297	67.73	0	0.021	0.021	0	3	rs338175,rs186693295,rs338176	0.08	0.46	0.29	2.61	0.88	1.17
5S_rRNA	WSCD2	WSCD2	WSCD2-001,WSCD2-002,WSCD2-004,WSCD2-005,WSCD2-006,WSCD2-007,WSCD2-008,WSCD2-009,WSCD2-010,WSCD2-201	12	108523093	108523271	121.18	0	0.021	0.021	0	4	rs338175,rs186693295,rs148526230,rs338176	0.07	0.45	0.28	1.64	0.88	0.75
5S_rRNA	ZDHHC17	ZDHHC17	ZDHHC17-001,ZDHHC17-002,ZDHHC17-003,ZDHHC17-004,ZDHHC17-005,ZDHHC17-006,ZDHHC17-007,ZDHHC17-008,ZDHHC17-009,ZDHHC17-201,ZDHHC17-202	12	77157871	77157971	65.13	0.026	0.021	0.021	0	1	rs114354873	0.09	0.09	0.09	#-nan	#-nan	-0.03
AC006129.1	CD247	CD247	CD247-007	1	167404281	167404490	141.98	10	0	0	0						#-nan	#-nan	#-nan
AC006129.1	GS1-204I12.4	GS1-204I12.4	GS1-204I12.4-001	1	185622989	185623085	60.1	0.17	0	0.049	0	3	rs112278679,rs73061129,rs144834737	0.02	0.02	0.02	-0.97	-0.96	-1.18
AC006129.1	ARHGAP21	ARHGAP21	ARHGAP21-001,ARHGAP21-002,ARHGAP21-003,ARHGAP21-007,ARHGAP21-008,ARHGAP21-011,ARHGAP21-012	10	25012667	25012769	66.69	0.034	0	0	0						#-nan	#-nan	#-nan
AC006129.1	FBXW4	FBXW4	FBXW4-001,FBXW4-002	10	103454669	103454760	60.19	0	0	0	0						#-nan	#-nan	#-nan
AC006129.1	TUBGCP2	TUBGCP2	TUBGCP2-003	10	135104870	135105187	202.75	0.079	0	0	0						#-nan	#-nan	#-nan
AC006129.1	VSTM4	VSTM4	VSTM4-001,VSTM4-002	10	50323371	50323482	71.42	0.019	0	0	0						#-nan	#-nan	#-nan
AC006129.1	Y_RNA.609	Y_RNA.609	Y_RNA.609-201	10	70262556	70262674	72.54	0	0	0	0						#-nan	#-nan	#-nan
AC006129.1	GGACT	GGACT	GGACT-002,GGACT-003	13	101240818	101240933	71.82	0.03	0.021	0.021	0	2	rs3825501,rs9513768	0.1	0.01	0.06	-0.97	0.48	0.13
AC006129.1	ZNF592	ZNF592	ZNF592-001	15	85291973	85292094	78.78	0.018	0	0	0						#-nan	#-nan	#-nan
AC006129.2	ABL2	ABL2	ABL2-001,ABL2-007,ABL2-008,ABL2-009,ABL2-010	1	179198562	179198695	97.24	0.016	0.008	0.016	0.008	1	rs2306941	0.01	0	0	1.88	1.96	1.94
AC006129.2	AC099676.1	AC099676.1	AC099676.1-201(*)	1	201893508	201893788	198.94	0	0	0	0	6	.,.,.,.,.,.	0.01	0.08	0.05	1.15	2.88	0.99
AC006129.2	ACBD6	ACBD6	ACBD6-001	1	180471681	180471782	70.56	0	0	0	0						#-nan	#-nan	#-nan
AC006129.2	AL160286.1,AXDND1	AL160286.1,AXDND1	AL160286.1-201,AXDND1-003	1	179457738	179457850	77.42	0.089	0	0.039	0	3	.,.,.	0.03	0.05	0.05	1.89	1.14	1.4
AC006129.2	AL591806.1	AL591806.1	AL591806.1-201	1	161034544	161034645	71.57	0.105	0.032	0.056	0	2	.,rs200750254	0.01	#-nan	0.01	-0.9	#-nan	#-nan
AC006129.2	ALDH9A1	ALDH9A1	ALDH9A1-001,ALDH9A1-004,ALDH9A1-005,ALDH9A1-201	1	165667742	165667880	99.79	0	0.021	0.021	0	1	rs12408101	0.14	0.06	0.19	1.33	#-nan	-0.32
AC006129.2	ARHGAP30	ARHGAP30	ARHGAP30-001,ARHGAP30-002,ARHGAP30-004,ARHGAP30-006,ARHGAP30-007,ARHGAP30-008,ARHGAP30-009	1	161038967	161039062	65.41	0.157	0	0	0						#-nan	#-nan	#-nan
AC006129.2	ARL8A	ARL8A	ARL8A-001	1	202113910	202114012	74.9	0	0	0	0						#-nan	#-nan	#-nan
AC006129.2	ARL8A	ARL8A	ARL8A-002	1	202104694	202104790	66.78	0	0	0	0						#-nan	#-nan	#-nan
AC006129.2	ARPC5,RGL1	ARPC5,RGL1	ARPC5-001,ARPC5-002,ARPC5-003,ARPC5-004,ARPC5-005,RGL1-001,RGL1-201	1	183604927	183605085	112.04	0	0	0.013	0	1	rs112313734	0.09	0.04	0.05	-0.56	-0.15	0.73
AC006129.2	ARPC5,RGL1	ARPC5,RGL1	ARPC5-001,ARPC5-002,ARPC5-003,ARPC5-004,ARPC5-005,RGL1-001,RGL1-201	1	183604929	183605093	114.66	0	0	0.013	0	1	rs112313734	0.09	0.04	0.05	-0.56	-0.15	0.73
AC006129.2	ASPM	ASPM	ASPM-001,ASPM-201,ASPM-202(*)	1	197115388	197115542	111.02	0	0	0	0						#-nan	#-nan	#-nan
AC006129.2	ASTN1	ASTN1	ASTN1-001,ASTN1-002,ASTN1-003,ASTN1-006,ASTN1-201	1	177133390	177133503	78.96	0	0	0.009	0	1	rs180777995	#-nan	0	0	#-nan	-0.9	#-nan
AC006129.2	ATP1A2	ATP1A2	ATP1A2-005	1	160103824	160103933	77.53	0	0	0.009	0						#-nan	#-nan	#-nan
AC006129.2	ATP1A2	ATP1A2	ATP1A2-006	1	160090691	160090777	60.92	0.012	0.021	0.021	0	1	rs55858252	0	#-nan	0	-0.97	#-nan	#-nan
AC006129.2	ATP1A4	ATP1A4	ATP1A4-001,ATP1A4-004	1	160121457	160121616	110.88	0.027	0.021	0.021	0	4	rs2369476,rs74123261,rs74123262,rs75539545	0.08	0.13	0.07	1.36	1.72	-0.83
AC006129.2	ATP1B1	ATP1B1	ATP1B1-001,ATP1B1-002,ATP1B1-003,ATP1B1-202	1	169075858	169075961	73.44	0.045	0	0	0						#-nan	#-nan	#-nan
AC006129.2	B4GALT3	B4GALT3	B4GALT3-001,B4GALT3-002,B4GALT3-003,B4GALT3-005,B4GALT3-006,B4GALT3-007,B4GALT3-008,B4GALT3-009,B4GALT3-010,B4GALT3-011,B4GALT3-012	1	161149089	161149175	61.78	0.164	0.08	0.095	0	1	rs4656990	0.01	0	0	-0.19	-0.42	-0.57
AC006129.2	B4GALT3	B4GALT3	B4GALT3-001,B4GALT3-002,B4GALT3-003,B4GALT3-005,B4GALT3-006,B4GALT3-007,B4GALT3-008,B4GALT3-009,B4GALT3-010,B4GALT3-011,B4GALT3-012	1	161149085	161149174	63.05	0.164	0.08	0.095	0	1	rs4656990	0.01	0	0	-0.19	-0.42	-0.57
AC006129.2	B4GALT3	B4GALT3	B4GALT3-001,B4GALT3-002,B4GALT3-003,B4GALT3-005,B4GALT3-006,B4GALT3-007,B4GALT3-008,B4GALT3-009,B4GALT3-010,B4GALT3-011,B4GALT3-012,B4GALT3-201(*)	1	161149087	161149176	63.05	0.164	0.08	0.095	0	1	rs4656990	0.01	0	0	-0.19	-0.42	-0.57
AC006129.2	BRINP2	BRINP2	BRINP2-002	1	177226521	177226605	61.76	0.026	0	0.012	0	1	rs77314950	0.02	0.03	0.02	#-nan	#-nan	-0.7
AC006129.2	BRINP2	BRINP2	BRINP2-002,BRINP2-003(*)	1	177226363	177226454	65.7	0.026	0	0.012	0						#-nan	#-nan	#-nan
AC006129.2	C1orf105	C1orf105	C1orf105-005	1	172411480	172411583	71.4	0.01	0.021	0.021	0	1	rs2230471	0.03	0.07	0.09	0.57	#-nan	-0.2
AC006129.2	C1orf105,PIGC	C1orf105,PIGC	C1orf105-005,PIGC-001,PIGC-002,PIGC-004,PIGC-008,PIGC-201	1	172412947	172413044	67.2	0.022	0.021	0.021	0	1	rs3213563	0.56	0.61	0.43	1.77	1.6	-0.64
AC006129.2	C1orf106	INAVA	C1orf106-001,C1orf106-004,C1orf106-005	1	200860142	200860227	62.16	0.057	0.012	0.012	0.012	1	rs3753957	0	0	0	-0.13	0.39	0.24
AC006129.2	C1orf106	INAVA	C1orf106-007	1	200876882	200876990	74.93	0	0	0	0						#-nan	#-nan	#-nan
AC006129.2	C1orf110	CCDC190	C1orf110-201(*)	1	162832333	162832435	70.79	0	0	0	0	3	rs12024415,rs150813175,rs112343239	0	0.02	0.02	-0.53	0	0.64
AC006129.2	C1orf111,C1orf226	SPATA46,C1orf226	C1orf111-001,C1orf111-002,C1orf226-001,C1orf226-002,C1orf111-201(*)	1	162348800	162348905	72.86	0.02	0	0.01	0	1	rs151089504	#-nan	0.01	0.01	#-nan	-0.77	#-nan
AC006129.2	C1orf21,RP11-382D12.2	C1orf21,C1orf21-DT	C1orf21-001,RP11-382D12.2-001	1	184356552	184356669	83.5	0	0	0	0						#-nan	#-nan	#-nan
AC006129.2	C1orf21,RP11-382D12.2	C1orf21,C1orf21-DT	C1orf21-001,RP11-382D12.2-001	1	184356581	184356669	63.5	0	0	0	0						#-nan	#-nan	#-nan
AC006129.2	C1ORF220,C1orf220	C1ORF220,C1orf220	C1ORF220-201,C1orf220-001,C1orf220-002,C1orf220-201	1	178512033	178512198	117.58	0.006	0	0.028	0						#-nan	#-nan	#-nan
AC006129.2	C1orf226,NOS1AP	C1orf226,NOS1AP	C1orf226-003,NOS1AP-005,NOS1AP-006	1	162337136	162337228	65.18	0.099	0	0.051	0	3	rs199857282,rs141683085,rs115433966	0	0	0	-0.97	#-nan	-1.31
AC006129.2	C1orf226,NOS1AP,RP11-565P22.6	C1orf226,NOS1AP,RP11-565P22.6	C1orf226-003,NOS1AP-005,NOS1AP-006,RP11-565P22.6-001	1	162334858	162334946	60.9	0.099	0	0.051	0	1	rs1809973	0.23	0.18	0.16	-0.25	0.1	1.75
AC006129.2	C1orf27,TPR	ODR4,TPR	C1orf27-001,C1orf27-004,C1orf27-201,TPR-001,TPR-002,TPR-003,TPR-201(*)	1	186344180	186344287	76.9	0	0	0.009	0	1	rs184235137	0.01	0.01	0.01	#-nan	#-nan	-0.9
AC006129.2	C1orf53	C1orf53	C1orf53-003	1	197875477	197875566	63.05	0	0	0.011	0	1	rs187835384	0.01	0.01	0.01	#-nan	#-nan	-0.9
AC006129.2	CACNA1E	CACNA1E	CACNA1E-001,CACNA1E-002,CACNA1E-003,CACNA1E-005,CACNA1E-006,CACNA1E-201,CACNA1E-202,CACNA1E-203,CACNA1E-204(*)	1	181452739	181452838	68.88	0	0	0.01	0	1	rs58365250	0.01	0.01	0.01	#-nan	#-nan	-0.83
AC006129.2	CACNA1E	CACNA1E	CACNA1E-004	1	181382356	181382442	62.63	0	0	0	0						#-nan	#-nan	#-nan
AC006129.2	CACNA1S	CACNA1S	CACNA1S-001,CACNA1S-002	1	201082027	201082144	81.48	0.018	0	0.009	0						#-nan	#-nan	#-nan
AC006129.2	CACYBP	CACYBP	CACYBP-001,CACYBP-002,CACYBP-003,CACYBP-004,CACYBP-006,CACYBP-007,CACYBP-008,CACYBP-009	1	174969464	174969594	89.01	0.008	0	0.008	0	1	rs6671849	0.04	0.04	0.04	#-nan	#-nan	-0.51
AC006129.2	CADM3	CADM3	CADM3-001,CADM3-002,CADM3-004	1	159141922	159142065	98.53	0	0	0.007	0	1	rs77541755	0.02	0.03	0.02	#-nan	#-nan	-0.7
AC006129.2	CAMSAP2	CAMSAP2	CAMSAP2-001,CAMSAP2-002,CAMSAP2-004	1	200708270	200708436	118	0	0	0.013	0	2	rs145309837,rs138047640	0.01	0.02	0.01	#-nan	#-nan	-1.17
AC006129.2	CASQ1	CASQ1	CASQ1-001,CASQ1-201	1	160158393	160158496	72.42	0.01	0.021	0.021	0	3	rs142837529,rs4656890,rs147259211	0.03	0.04	0.03	-1.32	-0.96	-0.45
AC006129.2	CASQ1	CASQ1	CASQ1-002	1	160163721	160163820	68.88	0.014	0	0.011	0	1	rs34277881	0.29	0.48	0.28	1.7	1.94	-0.7
AC006129.2	CCDC181	CCDC181	CCDC181-001,CCDC181-002,CCDC181-003,CCDC181-004	1	169396640	169396743	71.21	0.02	0	0.01	0						#-nan	#-nan	#-nan
AC006129.2	CD247	CD247	CD247-005,CD247-006	1	167410684	167410794	75.76	0.01	0.009	0.029	0.019	3	rs144480944,rs34725579,rs150908658	0.01	0.01	0.01	-1.17	#-nan	-0.83
AC006129.2	CD247	CD247	CD247-007	1	167404134	167404297	110.98	0	0.02	0.013	0	1	rs61806155	0.11	0.05	0.05	-0.07	0.69	0.9
AC006129.2	CDC73	CDC73	CDC73-001,CDC73-002	1	193091095	193091280	131.21	0	0	0.005	0.005	1	rs143969598	0	#-nan	0	-0.97	#-nan	#-nan
AC006129.2	CENPL,DARS2	CENPL,DARS2	CENPL-001,CENPL-002,CENPL-003,CENPL-004,CENPL-005,CENPL-006,CENPL-007,CENPL-008,CENPL-009,DARS2-001,DARS2-201	1	173793282	173793368	61.78	0.032	0	0.018	0	1	rs143989346	0.02	0.02	0.02	#-nan	#-nan	-0.77
AC006129.2	CEP350,RP11-533E19.5	CEP350,RP11-533E19.5	CEP350-001,CEP350-012,RP11-533E19.5-001	1	179924032	179924240	149.04	0.005	0.005	0.005	0.005	1	rs78339243	0.13	0	0.12	0.37	-0.96	#-nan
AC006129.2	CEP350	CEP350	CEP350-002,CEP350-003	1	180054171	180054256	60.49	0.025	0.021	0.021	0						#-nan	#-nan	#-nan
AC006129.2	CFH	CFH	CFH-001,CFH-002,CFH-003,CFH-201	1	196619197	196619282	60.49	0.026	0	0	0						#-nan	#-nan	#-nan
AC006129.2	CFHR1,CFHR2	CFHR1,CFHR2	CFHR1-001,CFHR1-002,CFHR1-003,CFHR1-006,CFHR2-201	1	196786175	196786263	60.86	0.264	0	0.012	0						#-nan	#-nan	#-nan
AC006129.2	CFHR2	CFHR2	CFHR2-001,CFHR2-002,CFHR2-003,CFHR2-004,CFHR2-005,CFHR2-006	1	196910199	196910289	60.79	0	0	0.012	0	1	rs113795045	0.02	0.02	0.02	#-nan	#-nan	-0.77
AC006129.2	COLGALT2	COLGALT2	COLGALT2-001,COLGALT2-201	1	184006039	184006198	114.91	0	0.006	0.006	0.006	1	rs74767794	0.04	0.15	0.08	1.66	1.96	0.94
AC006129.2	COLGALT2	COLGALT2	COLGALT2-002	1	183933100	183933203	75.34	0	0	0	0						#-nan	#-nan	#-nan
AC006129.2	CRB1	CRB1	CRB1-001,CRB1-004,CRB1-005,CRB1-006,CRB1-202,CRB1-201(*)	1	197234424	197234554	91.59	0.008	0.021	0.021	0	3	rs191819373,rs187368546,rs183662592	0.02	0.03	0.03	#-nan	#-nan	-1.21
AC006129.2	CRB1,ZBTB41	CRB1,ZBTB41	CRB1-201,ZBTB41-001,ZBTB41-002	1	197170405	197170532	89.04	0.017	0.021	0.021	0	1	rs185429657	0.03	0.04	0.04	#-nan	#-nan	-0.57
AC006129.2	CREG1	CREG1	CREG1-001	1	167522804	167523006	144.72	0.005	0	0.005	0	1	rs12410167	0.13	0.04	0.07	0.32	-0.48	#-nan
AC006129.2	CTA-134P22.2,DARC	CTA-134P22.2,DARC	CTA-134P22.2-001,DARC-001,DARC-002,DARC-003,DARC-201	1	159173525	159173630	74.98	0	0	0	0	1	rs3027008	0.16	0.02	0.12	0.62	-0.65	#-nan
AC006129.2	CTA-134P22.2,DARC	CTA-134P22.2,DARC	CTA-134P22.2-001,DARC-001,DARC-002,DARC-003,DARC-201	1	159173523	159173624	72.58	0	0	0	0	1	rs3027008	0.16	0.02	0.12	0.62	-0.65	#-nan
AC006129.2	DCAF6,MPC2	DCAF6,MPC2	DCAF6-001,DCAF6-002,DCAF6-003,DCAF6-007,DCAF6-008,DCAF6-009,DCAF6-011,DCAF6-201,MPC2-001,MPC2-002,MPC2-003	1	167906249	167906354	73.92	0.019	0.021	0.021	0						#-nan	#-nan	#-nan
AC006129.2	DDR2	DDR2	DDR2-001,DDR2-002,DDR2-003,DDR2-004	1	162598965	162599074	76.68	0	0	0.009	0						#-nan	#-nan	#-nan
AC006129.2	DEDD	DEDD	DEDD-001,DEDD-002,DEDD-003,DEDD-004,DEDD-005,DEDD-006,DEDD-007,DEDD-008,DEDD-009,DEDD-010,DEDD-201,DEDD-202,DEDD-203	1	161102307	161102443	98.06	0	0	0	0						#-nan	#-nan	#-nan
AC006129.2	DEDD	DEDD	DEDD-001,DEDD-002,DEDD-003,DEDD-004,DEDD-005,DEDD-006,DEDD-007,DEDD-008,DEDD-009,DEDD-010,DEDD-201,DEDD-202,DEDD-203	1	161102310	161102444	96.34	0	0	0	0						#-nan	#-nan	#-nan
AC006129.2	DENND1B	DENND1B	DENND1B-003,DENND1B-004,DENND1B-005,DENND1B-008,DENND1B-009,DENND1B-010,DENND1B-011	1	197743912	197744075	117.5	0	0	0.006	0						#-nan	#-nan	#-nan
AC006129.2	DENND1B	DENND1B	DENND1B-003,DENND1B-004,DENND1B-005,DENND1B-008,DENND1B-009,DENND1B-010,DENND1B-011,DENND1B-201(*)	1	197743916	197744093	127.01	0	0	0.006	0						#-nan	#-nan	#-nan
AC006129.2	DHX9	DHX9	DHX9-001,DHX9-007	1	182808416	182808548	94.15	0	0	0	0						#-nan	#-nan	#-nan
AC006129.2	DNM3	DNM3	DNM3-001,DNM3-002,DNM3-003,DNM3-007,DNM3-201	1	171810678	171810782	75.77	0.01	0	0.01	0	1	rs114247451	0.03	0	0.04	0.21	-0.77	-0.51
AC006129.2	DNM3OS,MIR199A2	DNM3OS,MIR199A2	DNM3OS-001,MIR199A2-201	1	172114465	172114554	63.05	0.036	0.036	0.05	0	1	rs116753258	0.06	0.05	0.05	#-nan	-0.96	-0.32
AC006129.2	DUSP12	DUSP12	DUSP12-001,DUSP12-002,DUSP12-003,DUSP12-004	1	161716273	161716402	91.16	0.18	0.008	0.124	0	5	.,.,.,rs72706012,.	0.12	0.05	0.06	-0.55	0.85	1.16
AC006129.2	DUSP23	DUSP23	DUSP23-001,DUSP23-002,DUSP23-003	1	159750953	159751085	95.47	0	0.021	0.021	0	1	rs201309161	#-nan	0	0	#-nan	-0.96	#-nan
AC006129.2	DUSP27	STYXL2	DUSP27-002	1	167095553	167095656	74.3	0	0	0.045	0						#-nan	#-nan	#-nan
AC006129.2	EDEM3	EDEM3	EDEM3-001,EDEM3-004,EDEM3-201	1	184723688	184723790	74.9	0.01	0.01	0.022	0.01	1	rs193034365	0	0.02	0.01	-0.97	-0.71	#-nan
AC006129.2	EDEM3	EDEM3	EDEM3-001,EDEM3-004,EDEM3-201	1	184724246	184724391	105.12	0.01	0.01	0.022	0.01						#-nan	#-nan	#-nan
AC006129.2	FAM129A	NIBAN1	FAM129A-001	1	184943164	184943249	61.34	0.012	0.012	0.012	0.012	1	rs234109	0.11	0.52	0.32	1.94	0.44	1.33
AC006129.2	FAM129A	NIBAN1	FAM129A-003,FAM129A-004	1	184836230	184836329	68.72	0.036	0.011	0	0						#-nan	#-nan	#-nan
AC006129.2	FAM20B	FAM20B	FAM20B-001,FAM20B-002	1	178995249	178995362	82.34	0.051	0	0.009	0	1	rs193196190	0.03	0	0.03	-0.37	-0.96	-0.9
AC006129.2	FAM78B,RP11-9L18.3	FAM78B,RP11-9L18.3	FAM78B-001,FAM78B-002,FAM78B-003,FAM78B-004,FAM78B-201,RP11-9L18.3-001	1	166135727	166135932	149.8	0.013	0.005	0	0.005						#-nan	#-nan	#-nan
AC006129.2	FAM78B,RP11-9L18.3	FAM78B,RP11-9L18.3	FAM78B-001,FAM78B-002,FAM78B-003,FAM78B-004,FAM78B-201,RP11-9L18.3-001	1	166135765	166136090	237.4	0.013	0.005	0	0.005	1	rs192842625	0.11	0.12	0.11	#-nan	#-nan	0.19
AC006129.2	FAM78B,RP11-9L18.3	FAM78B,RP11-9L18.3	FAM78B-001,FAM78B-002,FAM78B-003,FAM78B-004,FAM78B-201,RP11-9L18.3-001	1	166135810	166136005	142.79	0.013	0.005	0	0.005						#-nan	#-nan	#-nan
AC006129.2	FCGR2B	FCGR2B	FCGR2B-001,FCGR2B-002,FCGR2B-003,FCGR2B-004,FCGR2B-005,FCGR2B-203(*)	1	161630893	161631050	108.47	10	0.02	0.045	0	6	.,.,.,.,.,rs150803036	0.07	0.06	0.07	-0.79	-1.63	-0.09
AC006129.2	FCGR2B	FCGR2B	FCGR2B-201,FCGR2B-202,FCGR2B-203,FCGR2B-204	1	161549077	161549243	113.85	10	0.02	0.045	0	4	rs149040504,.,.,.	0.04	0	0.04	#-nan	#-nan	#-nan
AC006129.2	FCRLB	FCRLB	FCRLB-002	1	161696886	161696974	60.9	0.012	0	0.012	0	1	rs6658140	0.42	0.09	0.23	0.8	1.96	1.45
AC006129.2	GAS5,SNORD78,ZBTB37	GAS5,SNORD78,ZBTB37	GAS5-001,GAS5-002,GAS5-003,GAS5-004,GAS5-005,GAS5-006,GAS5-007,GAS5-008,GAS5-009,GAS5-010,GAS5-011,GAS5-012,GAS5-013,GAS5-014,GAS5-015,GAS5-016,GAS5-017,GAS5-018,GAS5-019,GAS5-020,GAS5-021,GAS5-022,GAS5-027,GAS5-028,GAS5-029,GAS5-201,GAS5-203,GAS5-204,GAS5-207,SNORD78-201,ZBTB37-001,ZBTB37-002,ZBTB37-003,ZBTB37-201,ZBTB37-202	1	173837640	173837851	149.1	0.013	0	0.013	0	2	rs9726181,rs115377635	0.05	0.06	0.06	#-nan	#-nan	-0.52
AC006129.2	GAS5,SNORD78,ZBTB37	GAS5,SNORD78,ZBTB37	GAS5-001,GAS5-002,GAS5-003,GAS5-004,GAS5-005,GAS5-006,GAS5-007,GAS5-008,GAS5-009,GAS5-010,GAS5-011,GAS5-012,GAS5-013,GAS5-014,GAS5-015,GAS5-016,GAS5-017,GAS5-018,GAS5-019,GAS5-020,GAS5-021,GAS5-022,GAS5-027,GAS5-028,GAS5-029,GAS5-201,GAS5-203,GAS5-204,GAS5-207,SNORD78-201,ZBTB37-001,ZBTB37-002,ZBTB37-003,ZBTB37-201,ZBTB37-202	1	173837703	173837866	115.87	0.013	0	0.013	0	2	rs9726181,rs115377635	0.05	0.06	0.06	#-nan	#-nan	-0.52
AC006129.2	GLUL	GLUL	GLUL-001,GLUL-002,GLUL-003,GLUL-004,GLUL-005,GLUL-006,GLUL-007,GLUL-008,GLUL-009,GLUL-201,GLUL-202	1	182360642	182360789	106.87	0.032	0	0	0						#-nan	#-nan	#-nan
AC006129.2	GLUL	GLUL	GLUL-001,GLUL-002,GLUL-003,GLUL-004,GLUL-005,GLUL-006,GLUL-007,GLUL-008,GLUL-009,GLUL-201,GLUL-202,GLUL-203(*)	1	182360652	182360791	101.62	0.032	0	0	0						#-nan	#-nan	#-nan
AC006129.2	GORAB	GORAB	GORAB-005,GORAB-006	1	170506190	170506274	60.91	0	0	0	0						#-nan	#-nan	#-nan
AC006129.2	GPR161	GPR161	GPR161-002,GPR161-003,GPR161-004,GPR161-005,GPR161-202,GPR161-203,GPR161-204,GPR161-205	1	168106148	168106301	109.73	0.021	0	0	0						#-nan	#-nan	#-nan
AC006129.2	GPR161	GPR161	GPR161-002,GPR161-003,GPR161-004,GPR161-005,GPR161-202,GPR161-203,GPR161-204,GPR161-205,GPR161-201(*)	1	168105967	168106060	65.6	0.021	0	0	0						#-nan	#-nan	#-nan
AC006129.2	GPR161	GPR161	GPR161-006	1	168060090	168060191	69.55	0.021	0	0	0						#-nan	#-nan	#-nan
AC006129.2	GS1-120K12.4	LINC01633	GS1-120K12.4-001	1	184967808	184967926	81.9	0.048	0.039	0	0						#-nan	#-nan	#-nan
AC006129.2	GS1-122H1.2	GS1-122H1.2	GS1-122H1.2-002	1	182285589	182285791	139.52	0	0	0	0	4	.,.,rs12038304,.	0	0.09	0.06	1.85	1.96	1.46
AC006129.2	GS1-204I12.4	GS1-204I12.4	GS1-204I12.4-001	1	185623510	185623628	83.92	0.039	0	0.073	0						#-nan	#-nan	#-nan
AC006129.2	GS1-279B7.2,IVNS1ABP	GS1-279B7.2,IVNS1ABP	GS1-279B7.2-001,IVNS1ABP-001,IVNS1ABP-002	1	185286307	185286419	81.03	0.019	0	0.016	0	1	rs111942298	0.01	0.01	0.01	#-nan	#-nan	-0.9
AC006129.2	GS1-279B7.2,IVNS1ABP	GS1-279B7.2,IVNS1ABP	GS1-279B7.2-001,IVNS1ABP-001,IVNS1ABP-002	1	185286196	185286391	139.97	0.019	0	0.016	0	2	rs74132215,rs191080771	0.01	0.01	0.01	-0.97	#-nan	-0.83
AC006129.2	HMCN1	HMCN1	HMCN1-001,HMCN1-201	1	185703552	185703667	81.79	0.009	0	0.019	0.009	1	rs141144991	0.08	0.08	0.08	#-nan	#-nan	-0.09
AC006129.2	IER5,RP11-309G3.3	IER5,RP11-309G3.3	IER5-001,RP11-309G3.3-001	1	181058306	181058450	105.56	0	0.007	0.014	0.007	2	rs3747955,rs200142413	0.02	0.17	0.09	0.65	1.93	1.2
AC006129.2	IGFN1	IGFN1	IGFN1-003	1	201171816	201171910	66.88	0.163	0.022	0.061	0	5	.,rs140453305,.,.,.	0	0	0	0.61	2.1	0.73
AC006129.2	IGFN1	IGFN1	IGFN1-004,IGFN1-201,IGFN1-202,IGFN1-203	1	201159888	201159987	70.72	0.046	0	0.01	0						#-nan	#-nan	#-nan
AC006129.2	IGSF8	IGSF8	IGSF8-001,IGSF8-002,IGSF8-003,IGSF8-201(*)	1	160071048	160071135	62.2	0.012	0	0.012	0	1	rs138975040	0.01	0.01	0.01	#-nan	#-nan	-0.9
AC006129.2	IGSF8	IGSF8	IGSF8-004	1	160063909	160064000	60.19	0	0.021	0.021	0						#-nan	#-nan	#-nan
AC006129.2	IGSF9	IGSF9	IGSF9-001,IGSF9-002,IGSF9-005,IGSF9-201(*)	1	159917899	159918032	95.04	0.096	0	0	0	1	.	0	0	0	-0.83	-0.9	-0.97
AC006129.2	ILDR2,MAEL	ILDR2,MAEL	ILDR2-001,ILDR2-002,ILDR2-003,ILDR2-004,ILDR2-005,ILDR2-006,ILDR2-007,MAEL-202(*)	1	166944715	166944809	67.89	0.022	0.011	0.011	0.011	2	rs112416021,rs186023662	0.15	0.26	0.16	0.93	0	1.91
AC006129.2	ILDR2	ILDR2	ILDR2-008(*)	1	166889933	166890036	70.38	0	0	0	0						#-nan	#-nan	#-nan
AC006129.2	IPO9,IPO9-AS1	IPO9,IPO9-AS1	IPO9-001,IPO9-004,IPO9-AS1-001,IPO9-AS1-002,IPO9-AS1-003	1	201798239	201798325	60.92	0.067	0.016	0.033	0						#-nan	#-nan	#-nan
AC006129.2	ITLN1	ITLN1	ITLN1-001	1	160858117	160858213	63.92	0.011	0.011	0.022	0	1	rs57532622	0.22	0.23	0.23	#-nan	#-nan	1.06
AC006129.2	ITLN1	ITLN1	ITLN1-002,ITLN1-003	1	160851575	160851683	77.11	0.01	0.021	0.021	0	1	rs10908808	0.22	0.35	0.22	1.66	1.17	1.45
AC006129.2	KCNJ10	KCNJ10	KCNJ10-001	1	160040219	160040313	65.94	0.011	0.021	0.021	0						#-nan	#-nan	#-nan
AC006129.2	KCNJ10	KCNJ10	KCNJ10-002	1	160011998	160012089	64.75	0	0	0.012	0						#-nan	#-nan	#-nan
AC006129.2	KCNJ9	KCNJ9	KCNJ9-001	1	160051403	160051488	61.34	0	0	0	0						#-nan	#-nan	#-nan
AC006129.2	KIAA0040	KIAA0040	KIAA0040-001,KIAA0040-002,KIAA0040-003,KIAA0040-004,KIAA0040-005	1	175161899	175162031	93.29	0.016	0.01	0.02	0	1	rs10912903	0.13	0	0.07	1.89	1.72	1.45
AC006129.2	KIAA0040	KIAA0040	KIAA0040-001,KIAA0040-002,KIAA0040-003,KIAA0040-004,KIAA0040-005	1	175161892	175162000	78.19	0.016	0.01	0.02	0	1	rs10912903	0.13	0	0.07	1.89	1.72	1.45
AC006129.2	KIAA1614	KIAA1614	KIAA1614-001,KIAA1614-003	1	180882104	180882221	87.02	0.018	0	0	0						#-nan	#-nan	#-nan
AC006129.2	KIAA1614	KIAA1614	KIAA1614-005	1	180909776	180909877	70.56	0.01	0.01	0.01	0	1	rs7527331	0.03	0.03	0.03	#-nan	#-nan	-0.64
AC006129.2	KIF21B,RP11-168O16.1	KIF21B,RP11-168O16.1	KIF21B-002,KIF21B-003,KIF21B-005,KIF21B-006,RP11-168O16.1-001,RP11-168O16.1-002	1	200992723	200992828	75.17	0.025	0	0.01	0	1	rs192321957	0.02	0.03	0.02	#-nan	#-nan	-0.7
AC006129.2	KIF21B,RP11-168O16.1	KIF21B,RP11-168O16.1	KIF21B-002,KIF21B-003,KIF21B-005,KIF21B-006,RP11-168O16.1-001,RP11-168O16.1-002	1	200992738	200992887	107.14	0.025	0	0.01	0	1	rs192321957	0.02	0.03	0.02	#-nan	#-nan	-0.7
AC006129.2	KIF21B,RP11-168O16.1	KIF21B,RP11-168O16.1	KIF21B-002,KIF21B-003,KIF21B-005,KIF21B-006,RP11-168O16.1-001,RP11-168O16.1-002	1	200992746	200992834	61.77	0.025	0	0.01	0						#-nan	#-nan	#-nan
AC006129.2	KIF21B	KIF21B	KIF21B-004	1	200976064	200976610	388.09	0.139	0.016	0.027	0	1	.	0.13	0	0.06	1.94	-0.96	1.56
AC006129.2	KIFAP3	KIFAP3	KIFAP3-001,KIFAP3-003,KIFAP3-201	1	170043626	170043719	65.52	0.011	0.021	0.021	0	2	.,rs192114450	0.05	0	0.05	-0.32	-0.96	-0.97
AC006129.2	KIFAP3	KIFAP3	KIFAP3-005	1	170055812	170055900	62.62	0.061	0.012	0.037	0	1	rs75474110	0	0	0	#-nan	#-nan	#-nan
AC006129.2	KLHDC9	KLHDC9	KLHDC9-001,KLHDC9-003,KLHDC9-004,KLHDC9-005,KLHDC9-006,KLHDC9-008,KLHDC9-009	1	161065150	161065292	96.7	0	0	0	0	1	rs202187026	0.03	0.03	0.03	#-nan	#-nan	-0.97
AC006129.2	KLHL20	KLHL20	KLHL20-001,KLHL20-002,KLHL20-003,KLHL20-004,KLHL20-201	1	173684382	173684475	65.6	0.011	0	0	0						#-nan	#-nan	#-nan
AC006129.2	LAD1	LAD1	LAD1-003,LAD1-004	1	201353259	201353349	62.51	0	0	0.012	0						#-nan	#-nan	#-nan
AC006129.2	LAD1	LAD1	LAD1-005	1	201356154	201356245	62.02	0	0.021	0.021	0	1	rs199686862	#-nan	0	0	#-nan	-0.96	#-nan
AC006129.2	LAMC1	LAMC1	LAMC1-001	1	182993209	182993345	95.34	0.008	0	0.007	0	1	rs190406500	#-nan	0	0	#-nan	-0.96	#-nan
AC006129.2	LAMC2	LAMC2	LAMC2-001,LAMC2-003	1	183155387	183155502	80.94	0.009	0.021	0.021	0	3	rs684527,rs77133472,rs2276542	0.09	0.11	0.08	1.3	2.29	0.69
AC006129.2	LGR6	LGR6	LGR6-001	1	202159872	202159973	66.53	0	0.022	0.062	0	2	rs4950833,rs7539968	0.37	0.38	0.27	1.94	2.38	0.23
AC006129.2	LGR6	LGR6	LGR6-002,LGR6-007	1	202173360	202173585	159.32	0.04	0.031	0.025	0						#-nan	#-nan	#-nan
AC006129.2	LGR6	LGR6	LGR6-010	1	202191437	202191581	104.11	0.014	0	0	0						#-nan	#-nan	#-nan
AC006129.2	LHX4	LHX4	LHX4-001,LHX4-003	1	180199358	180199467	76.44	0	0.021	0.021	0	1	rs138033992	0	0.15	0.11	-0.9	-0.48	0.03
AC006129.2	LINC01031	LINC01031	LINC01031-001	1	193274118	193274215	68.16	0.022	0	0.011	0	1	rs140027598	0.04	#-nan	0.04	-0.5	#-nan	#-nan
AC006129.2	LINC01035	LINC01035	LINC01035-001	1	188873171	188873276	74.98	0.01	0.031	0.01	0	2	.,rs73052406	0.29	0.25	0.25	#-nan	#-nan	-0.09
AC006129.2	LINC01037	LINC01037	LINC01037-001,LINC01037-002	1	187413877	187413997	84.42	0.193	0	0.028	0	2	rs72641773,rs184869460	0	0.26	0.25	-0.9	1.38	-0.97
AC006129.2	LINC01133	LINC01133	LINC01133-001,LINC01133-002	1	159931482	159931578	68.59	0	0	0.023	0	2	rs146347348,rs114700558	0.03	0.03	0.03	#-nan	-0.96	-1.04
AC006129.2	LMX1A	LMX1A	LMX1A-001,LMX1A-002,LMX1A-003	1	165325956	165326070	80.51	0	0	0	0						#-nan	#-nan	#-nan
AC006129.2	LMX1A,RP11-38C18.3	LMX1A,LMX1A-AS1	LMX1A-004,RP11-38C18.3-001	1	165182407	165182505	67.48	0	0	0.021	0	2	rs12040140,rs138479785	0	0.35	0.26	0.09	1.71	0.81
AC006129.2	LY9	LY9	LY9-001,LY9-002,LY9-003,LY9-005,LY9-008,LY9-009,LY9-010,LY9-011,LY9-012,LY9-201,LY9-202,LY9-203	1	160765431	160765518	61.32	0	0	0.012	0	1	rs114399407	0.02	0.02	0.02	#-nan	#-nan	-0.77
AC006129.2	MGST3	MGST3	MGST3-001,MGST3-002,MGST3-003,MGST3-004,MGST3-005,MGST3-006,MGST3-007,MGST3-008,MGST3-013,MGST3-201	1	165600834	165600931	66.24	0	0	0	0						#-nan	#-nan	#-nan
AC006129.2	MGST3	MGST3	MGST3-009,MGST3-014	1	165618568	165618667	69.86	0.01	0	0	0						#-nan	#-nan	#-nan
AC006129.2	MIR1295A	MIR1295A	MIR1295A-201	1	171073912	171074045	88.44	0.016	0	0.024	0	2	rs112505692,rs151072108	0.18	0.1	0.08	0.17	-0.26	-0.83
AC006129.2	MPZ	MPZ	MPZ-003,MPZ-006,MPZ-004(*)	1	161275481	161275583	71.82	0.01	0	0	0						#-nan	#-nan	#-nan
AC006129.2	MPZL1	MPZL1	MPZL1-001,MPZL1-004,MPZL1-005,MPZL1-006,MPZL1-007,MPZL1-008,MPZL1-011	1	167690944	167691071	89.46	0	0.008	0.027	0.008	2	rs4142140,rs3738229	0.05	0.06	0.03	-0.46	-0.44	-0.97
AC006129.2	MPZL1	MPZL1	MPZL1-001,MPZL1-004,MPZL1-005,MPZL1-006,MPZL1-007,MPZL1-008,MPZL1-011	1	167690947	167691071	89.42	0	0.008	0.027	0.008	2	rs4142140,rs3738229	0.05	0.06	0.03	-0.46	-0.44	-0.97
AC006129.2	MPZL1	MPZL1	MPZL1-010	1	167741157	167741246	60.38	0.041	0	0.012	0						#-nan	#-nan	#-nan
AC006129.2	MR1	MR1	MR1-001,MR1-002,MR1-003,MR1-004,MR1-005,MR1-006,MR1-201	1	181000330	181000441	78.38	0.052	0.13	0.08	0						#-nan	#-nan	#-nan
AC006129.2	NAV1	NAV1	NAV1-001,NAV1-201,NAV1-202,NAV1-203	1	201613975	201614095	83.58	0.019	0.021	0.021	0	2	rs192529724,rs138381879	#-nan	0	0	#-nan	-1.25	#-nan
AC006129.2	NAV1,RP11-90L20.2	NAV1,RP11-90L20.2	NAV1-002,NAV1-003,RP11-90L20.2-001	1	201709374	201709464	61.69	0.037	0	0.008	0						#-nan	#-nan	#-nan
AC006129.2	NAV1,RP11-90L20.2	NAV1,RP11-90L20.2	NAV1-002,NAV1-003,RP11-90L20.2-001	1	201709319	201709450	88.94	0.037	0	0.008	0						#-nan	#-nan	#-nan
AC006129.2	NHLH1	NHLH1	NHLH1-001	1	160334964	160335055	64.75	0.011	0	0.011	0	1	.	0	#-nan	0	-0.97	#-nan	#-nan
AC006129.2	NIT1,PFDN2	NIT1,PFDN2	NIT1-001,NIT1-002,NIT1-003,NIT1-004,NIT1-005,NIT1-006,NIT1-007,NIT1-008,NIT1-009,NIT1-010,NIT1-011,NIT1-012,NIT1-013,NIT1-201,NIT1-202,PFDN2-001,PFDN2-002	1	161087720	161087862	100.11	0	0	0	0						#-nan	#-nan	#-nan
AC006129.2	NIT1,PFDN2	NIT1,PFDN2	NIT1-001,NIT1-002,NIT1-003,NIT1-004,NIT1-005,NIT1-006,NIT1-007,NIT1-008,NIT1-009,NIT1-010,NIT1-011,NIT1-012,NIT1-013,NIT1-201,NIT1-202,PFDN2-001,PFDN2-002	1	161087713	161087834	85.2	0	0	0	0						#-nan	#-nan	#-nan
AC006129.2	NME7	NME7	NME7-008	1	169203130	169203220	63.42	0.012	0	0.011	0	4	rs146554340,.,.,.	0.02	0.01	0.02	#-nan	-0.37	#-nan
AC006129.2	NMNAT2	NMNAT2	NMNAT2-001	1	183387610	183387700	62.58	0.024	0.021	0.021	0						#-nan	#-nan	#-nan
AC006129.2	NOS1AP	NOS1AP	NOS1AP-001,NOS1AP-008,NOS1AP-009	1	162039457	162039583	90.29	0.017	0.017	0	0.025						#-nan	#-nan	#-nan
AC006129.2	NPHS2,RNU5F-2P	NPHS2,RNU5F-2P	NPHS2-001,NPHS2-002,RNU5F-2P-201	1	179545137	179545256	83.16	0.037	0	0.009	0	1	rs115256710	0.12	0.13	0.12	#-nan	#-nan	0.29
AC006129.2	NPL	NPL	NPL-001,NPL-002,NPL-003,NPL-004,NPL-005,NPL-006,NPL-007,NPL-204	1	182758863	182758968	76.21	0.057	0.01	0.01	0.01	1	rs12135645	0.04	0	0.05	-0.37	#-nan	-0.97
AC006129.2	NPL	NPL	NPL-001,NPL-002,NPL-003,NPL-004,NPL-005,NPL-006,NPL-007,NPL-204	1	182758864	182758970	77.53	0.057	0.01	0.01	0.01						#-nan	#-nan	#-nan
AC006129.2	NPL	NPL	NPL-001,NPL-002,NPL-003,NPL-004,NPL-005,NPL-006,NPL-007,NPL-204	1	182758861	182758970	78.84	0.057	0.01	0.01	0.01	1	rs12135645	0.04	0	0.05	-0.37	#-nan	-0.97
AC006129.2	NR5A2	NR5A2	NR5A2-001,NR5A2-002,NR5A2-003,NR5A2-004	1	199993865	199993979	80.51	0.075	0	0.06	0						#-nan	#-nan	#-nan
AC006129.2	NR5A2	NR5A2	NR5A2-201	1	200008894	200009020	90.29	0.008	0	0.027	0	1	rs113762480	0	0.05	0.03	-0.01	-0.9	-0.2
AC006129.2	NUF2	NUF2	NUF2-011	1	163311363	163311457	63.11	0.012	0.021	0.021	0	1	rs148905171	0.02	0.06	0.04	-0.76	-0.21	#-nan
AC006129.2	OCLM	OCLM	OCLM-001(*)	1	186370619	186370734	82.08	0	0	0	0	2	.,.	0.01	0.02	0.02	-0.97	#-nan	-0.77
AC006129.2	OLFML2B	OLFML2B	OLFML2B-001,OLFML2B-006	1	161992481	161992587	73.5	0.01	0	0	0						#-nan	#-nan	#-nan
AC006129.2	OLFML2B	OLFML2B	OLFML2B-002	1	161958357	161958449	62.42	0.05	0	0.011	0	1	rs77002211	0.02	0.02	0.02	#-nan	#-nan	-0.77
AC006129.2	OR10J5	OR10J5	OR10J5-001	1	159508981	159509104	85.28	0.093	0.008	0.008	0	1	rs6427483	0.3	0.3	0.3	#-nan	-0.96	1.51
AC006129.2	PAPPA2	PAPPA2	PAPPA2-004	1	176521463	176521620	112.32	0.007	0	0.006	0						#-nan	#-nan	#-nan
AC006129.2	PBX1	PBX1	PBX1-001,PBX1-002,PBX1-006,PBX1-007,PBX1-010,PBX1-012,PBX1-020,PBX1-201,PBX1-202	1	164528273	164528371	68.46	0.021	0	0.014	0						#-nan	#-nan	#-nan
AC006129.2	PBX1	PBX1	PBX1-011	1	164620818	164620913	67.31	0	0	0.011	0						#-nan	#-nan	#-nan
AC006129.2	PBX1	PBX1	PBX1-015	1	164545643	164545755	78.54	0.043	0	0.009	0	1	rs79065846	0	0	0	#-nan	#-nan	-0.97
AC006129.2	PBX1	PBX1	PBX1-203,PBX1-201(*),PBX1-202(*)	1	164759741	164759892	105.84	0	0	0	0	1	rs144944992	0	#-nan	0	-0.97	#-nan	#-nan
AC006129.2	PCP4L1	PCP4L1	PCP4L1-001	1	161225628	161225757	93.31	0.018	0.021	0.021	0						#-nan	#-nan	#-nan
AC006129.2	PEA15	PEA15	PEA15-001,PEA15-002,PEA15-003	1	160176352	160176466	81.37	0.019	0	0	0						#-nan	#-nan	#-nan
AC006129.2	PEA15	PEA15	PEA15-001,PEA15-002,PEA15-003	1	160175572	160175672	68.31	0.019	0	0	0						#-nan	#-nan	#-nan
AC006129.2	PEA15,RP11-536C5.7	PEA15,PEA15-AS1	PEA15-004,RP11-536C5.7-001	1	160178068	160178165	67.2	0	0	0.014	0	1	rs146769931	0.01	0.01	0.01	#-nan	#-nan	-0.83
AC006129.2	PHLDA3	PHLDA3	PHLDA3-001,PHLDA3-002,PHLDA3-003,PHLDA3-004	1	201438192	201438350	112.04	0.013	0	0	0						#-nan	#-nan	#-nan
AC006129.2	PHLDA3	PHLDA3	PHLDA3-001,PHLDA3-002,PHLDA3-003,PHLDA3-004	1	201438209	201438417	147.82	0.013	0	0	0						#-nan	#-nan	#-nan
AC006129.2	POGK	POGK	POGK-001,POGK-002,POGK-003,POGK-201,POGK-202	1	166808671	166808869	144.1	0	0	0	0						#-nan	#-nan	#-nan
AC006129.2	POU2F1,RP11-277B15.3	POU2F1,POU2F1-DT	POU2F1-001,POU2F1-002,POU2F1-004,POU2F1-006,POU2F1-007,POU2F1-010,POU2F1-011,POU2F1-015,POU2F1-016,POU2F1-201,POU2F1-202,POU2F1-203,RP11-277B15.3-001	1	167190391	167190542	107.35	0.029	0.007	0	0.007	1	rs34595166	0.03	#-nan	0.03	-0.63	#-nan	#-nan
AC006129.2	POU2F1,RP11-277B15.3	POU2F1,POU2F1-DT	POU2F1-001,POU2F1-002,POU2F1-004,POU2F1-006,POU2F1-007,POU2F1-010,POU2F1-011,POU2F1-015,POU2F1-016,POU2F1-201,POU2F1-202,POU2F1-203,RP11-277B15.3-001	1	167191157	167191309	109.3	0.029	0.007	0	0.007	1	rs10082006	0.43	0.56	0.41	1.23	0.57	0.98
AC006129.2	PPP1R12B	PPP1R12B	PPP1R12B-001,PPP1R12B-005,PPP1R12B-011,PPP1R12B-012,PPP1R12B-201	1	202318509	202318609	69.3	0	0	0.013	0	1	rs116801633	0.01	0.01	0.01	#-nan	#-nan	-0.9
AC006129.2	PRDX6	PRDX6	PRDX6-001,PRDX6-002	1	173446275	173446431	110.33	0.064	0.007	0	0	1	.	0.1	0.11	0.11	#-nan	#-nan	-0.97
AC006129.2	PRRC2C	PRRC2C	PRRC2C-001,PRRC2C-003,PRRC2C-005,PRRC2C-010,PRRC2C-201,PRRC2C-202	1	171452367	171452477	79.06	0.02	0	0.018	0	1	.	0.11	0.15	0.07	0.26	0.69	-0.97
AC006129.2	PTGS2,RP5-973M2.2	PTGS2,RP5-973M2.2	PTGS2-001,PTGS2-002,PTGS2-004,PTGS2-005,RP5-973M2.2-001	1	186649310	186649443	95.04	0	0.021	0.021	0	1	rs191808038	#-nan	0	0	#-nan	-0.96	#-nan
AC006129.2	PTPN7	PTPN7	PTPN7-001,PTPN7-003,PTPN7-004,PTPN7-005,PTPN7-007,PTPN7-008,PTPN7-009,PTPN7-010,PTPN7-011,PTPN7-012,PTPN7-013,PTPN7-014,PTPN7-015,PTPN7-016,PTPN7-017,PTPN7-018,PTPN7-019,PTPN7-020,PTPN7-201,PTPN7-202,PTPN7-203	1	202130264	202130353	62.16	0.024	0.015	0.031	0.015						#-nan	#-nan	#-nan
AC006129.2	PTPN7	PTPN7	PTPN7-001,PTPN7-003,PTPN7-005,PTPN7-007,PTPN7-008,PTPN7-009,PTPN7-010,PTPN7-011,PTPN7-012,PTPN7-013,PTPN7-014,PTPN7-015,PTPN7-016,PTPN7-017,PTPN7-018,PTPN7-019,PTPN7-020,PTPN7-201,PTPN7-202,PTPN7-203	1	202131742	202131833	63	0.024	0.015	0.031	0.015						#-nan	#-nan	#-nan
AC006129.2	PVRL4	NECTIN4	PVRL4-002	1	161044586	161044688	70.79	0.01	0	0	0						#-nan	#-nan	#-nan
AC006129.2	QSOX1	QSOX1	QSOX1-001,QSOX1-002,QSOX1-003	1	180123808	180123971	115.87	0.02	0.013	0.013	0.013	2	rs7531169,rs7531170	0.71	0.45	0.5	-0.07	1.51	-0.02
AC006129.2	QSOX1	QSOX1	QSOX1-001,QSOX1-002,QSOX1-003	1	180124473	180124659	130.62	0.02	0.013	0.013	0.013	2	rs34430949,rs145591318	0.18	0.49	0.31	0.93	-0.83	0.66
AC006129.2	RABGAP1L,RP11-160H22.5	RABGAP1L,RABGAP1L-DT	RABGAP1L-001,RABGAP1L-002,RABGAP1L-003,RABGAP1L-201,RP11-160H22.5-001,RP11-160H22.5-002,RP11-160H22.5-003,RP11-160H22.5-004	1	174129059	174129189	93.74	0	0	0.016	0	2	rs116442069,rs115269257	0.04	0.05	0.04	-0.83	-0.96	-0.38
AC006129.2	RABGAP1L	RABGAP1L	RABGAP1L-006	1	174766661	174766839	126.52	0.018	0	0.006	0	1	rs76616345	0	0.13	0.11	-0.19	1.41	-0.2
AC006129.2	RALGPS2,RP11-428K3.1	RALGPS2,RALGPS2-AS1	RALGPS2-001,RALGPS2-002,RALGPS2-003,RALGPS2-201,RP11-428K3.1-001	1	178694674	178694779	77.09	0.01	0.01	0.01	0.01						#-nan	#-nan	#-nan
AC006129.2	RALGPS2,RP11-428K3.1	RALGPS2,RALGPS2-AS1	RALGPS2-001,RALGPS2-002,RALGPS2-003,RALGPS2-201,RP11-428K3.1-001	1	178694679	178694781	74.02	0.01	0.01	0.01	0.01						#-nan	#-nan	#-nan
AC006129.2	RALGPS2	RALGPS2	RALGPS2-005,RALGPS2-006	1	178855900	178855994	65	0	0	0.011	0						#-nan	#-nan	#-nan
AC006129.2	RASAL2,RASAL2-AS1	RASAL2,RASAL2-AS1	RASAL2-002,RASAL2-201,RASAL2-AS1-001,RASAL2-AS1-002,RASAL2-AS1-003	1	178062834	178062995	115.78	0.048	0.026	0.013	0	3	rs182399398,rs1332947,rs185853948	0.09	0.11	0.09	-0.19	-0.54	0.46
AC006129.2	RASAL2,RASAL2-AS1	RASAL2,RASAL2-AS1	RASAL2-002,RASAL2-201,RASAL2-AS1-001,RASAL2-AS1-002,RASAL2-AS1-003	1	178063520	178063616	70.52	0.048	0.026	0.013	0	1	rs316255	0	#-nan	0	-0.97	#-nan	#-nan
AC006129.2	RC3H1,RP11-160H22.3	RC3H1,RC3H1-DT	RC3H1-003,RP11-160H22.3-001	1	173991301	173991478	127.01	0	0	0.006	0	1	rs141805782	0	0	0	#-nan	#-nan	-0.97
AC006129.2	RC3H1,RP11-160H22.3	RC3H1,RC3H1-DT	RC3H1-003,RP11-160H22.3-001	1	173991278	173991577	215.14	0	0	0.006	0	1	rs141805782	0	0	0	#-nan	#-nan	-0.97
AC006129.2	RC3H1	RC3H1	RC3H1-005	1	173911371	173911459	60.03	0.124	0	0.026	0	1	rs115802439	0	0.03	0.01	-0.76	#-nan	-0.7
AC006129.2	RCSD1,RP3-455J7.4	RCSD1,RP3-455J7.4	RCSD1-001,RCSD1-002,RCSD1-003,RCSD1-004,RCSD1-005,RCSD1-201,RP3-455J7.4-001	1	167599425	167599555	91.59	0	0.008	0.016	0	1	rs3738220	0.06	0.17	0.09	0.37	1.23	-0.64
AC006129.2	RCSD1,RP3-455J7.4	RCSD1,RP3-455J7.4	RCSD1-001,RCSD1-002,RCSD1-003,RCSD1-004,RCSD1-005,RCSD1-201,RP3-455J7.4-001	1	167599428	167599555	91.58	0	0.008	0.016	0	1	rs3738220	0.06	0.17	0.09	0.37	1.23	-0.64
AC006129.2	RFWD2,RP11-195C7.1	COP1,COP1-DT	RFWD2-001,RFWD2-002,RFWD2-006,RFWD2-007,RFWD2-009,RFWD2-010,RP11-195C7.1-001	1	176175825	176175985	113.74	0.016	0	0.01	0	1	rs140755121	0.19	0.09	0.12	-0.9	-0.31	1.02
AC006129.2	RFWD2,RP11-195C7.1	COP1,COP1-DT	RFWD2-001,RFWD2-002,RFWD2-006,RFWD2-007,RFWD2-009,RFWD2-010,RP11-195C7.1-001	1	176175822	176176133	223.78	0.016	0	0.01	0	2	rs140755121,rs115466880	0.15	0.07	0.09	-0.9	-0.31	1.02
AC006129.2	RFWD2,RP11-195C7.1	COP1,COP1-DT	RFWD2-001,RFWD2-002,RFWD2-006,RFWD2-007,RFWD2-009,RFWD2-010,RP11-195C7.1-001	1	176176308	176176437	94.61	0.016	0	0.01	0	2	rs3833529,rs144677485	0.01	0.03	0.04	-0.44	-0.9	-0.77
AC006129.2	RGL1	RGL1	RGL1-002,RGL1-202	1	183774260	183774352	67.01	0	0	0	0						#-nan	#-nan	#-nan
AC006129.2	RGS13	RGS13	RGS13-003	1	192610283	192610493	147.42	0.102	0.015	0.042	0	3	.,.,rs148763367	0.43	0.53	0.34	#-nan	-0.6	#-nan
AC006129.2	RGS8	RGS8	RGS8-006	1	182653737	182653849	77.7	0	0.021	0.021	0	3	rs116712213,rs75814251,rs143217605	0.01	#-nan	0.01	-1.39	#-nan	#-nan
AC006129.2	RNF2	RNF2	RNF2-001,RNF2-002,RNF2-003,RNF2-004	1	185014735	185014862	88.2	0.044	0	0.008	0	1	rs117020114	0.01	0.08	0.09	#-nan	0.25	-0.9
AC006129.2	RNF2	RNF2	RNF2-001,RNF2-002,RNF2-003,RNF2-004	1	185014516	185014619	73.44	0.044	0	0.008	0						#-nan	#-nan	#-nan
AC006129.2	RNPEP	RNPEP	RNPEP-001,RNPEP-002,RNPEP-003,RNPEP-004,RNPEP-005,RNPEP-006,RNPEP-007,RNPEP-008,RNPEP-009,RNPEP-010,RNPEP-014(*)	1	201952217	201952314	70.08	0.049	0.023	0.036	0.023	4	rs61241020,rs73074403,rs112370844,rs148779855	0.05	0.06	0.04	2.52	2.52	2.39
AC006129.2	RNU6-609P	RNU6-609P	RNU6-609P-201	1	199984239	199984337	70.42	0.01	0	0	0	1	rs200929557	0.03	0.04	0.04	#-nan	#-nan	-0.97
AC006129.2	RNU6-704P	RNU6-704P	RNU6-704P-201	1	200904644	200904731	60.44	0	0	0.055	0	2	rs7516888,rs148235214	0.1	0.1	0.09	#-nan	-0.9	0.08
AC006129.2	RP11-168O16.2	RP11-168O16.2	RP11-168O16.2-002(*)	1	200999873	200999964	64.8	0	0	0	0	1	rs10800751	0.36	0.44	0.28	1.94	1.88	-0.2
AC006129.2	RP11-190A12.7	RP11-190A12.7	RP11-190A12.7-001,RP11-190A12.7-002,RP11-190A12.7-003,RP11-190A12.7-004,RP11-190A12.7-005	1	159841566	159841659	62.71	0.023	0	0.036	0	2	rs2494517,rs139008439	0.05	0.06	0.05	-0.97	#-nan	-0.38
AC006129.2	RP11-296O14.3	PRDX6-AS1	RP11-296O14.3-001	1	173429044	173429140	69.55	0.011	0.011	0.011	0	1	rs114048375	0.05	#-nan	0.05	-0.37	#-nan	#-nan
AC006129.2	RP11-309H21.2	LINC01680	RP11-309H21.2-001	1	191200441	191200526	60.48	0	0	0.038	0	1	rs149719746	0.02	#-nan	0.03	#-nan	#-nan	#-nan
AC006129.2	RP11-312J18.6,RP11-544M22.1	RP11-312J18.6,RP11-544M22.1	RP11-312J18.6-001,RP11-544M22.1-001	1	160903194	160903297	73.44	10	0	0.02	0						#-nan	#-nan	#-nan
AC006129.2	RP11-312J18.6,RP11-544M22.1	RP11-312J18.6,RP11-544M22.1	RP11-312J18.6-001,RP11-544M22.1-001	1	160903097	160903247	108.43	10	0	0.02	0						#-nan	#-nan	#-nan
AC006129.2	RP11-359K18.3,UAP1	UAP1-DT,UAP1	RP11-359K18.3-001,UAP1-001,UAP1-004,UAP1-201	1	162531698	162531805	73.69	0.033	0	0	0						#-nan	#-nan	#-nan
AC006129.2	RP11-359K18.3,UAP1	UAP1-DT,UAP1	RP11-359K18.3-001,UAP1-001,UAP1-004,UAP1-201	1	162531522	162531626	75.77	0.033	0	0	0						#-nan	#-nan	#-nan
AC006129.2	RP11-382D12.1	RP11-382D12.1	RP11-382D12.1-001	1	184296978	184297071	65.6	0.775	0.124	0.081	0	1	.	0	0.09	0.05	0.66	-0.48	0.77
AC006129.2	RP11-404F10.2	RP11-404F10.2	RP11-404F10.2-001,RP11-404F10.2-002,RP11-404F10.2-003	1	160639883	160639994	75.89	0.054	0	0.05	0	1	rs188285360	0	0	0	#-nan	#-nan	-0.97
AC006129.2	RP11-466F5.10	RP11-466F5.10	RP11-466F5.10-001	1	165677348	165677450	71.99	0	0.044	0.075	0	4	rs72698094,rs111398268,rs71757383,rs181181016	0.1	0.34	0.34	-0.51	1.58	0.02
AC006129.2	RP11-46A10.2	LINC02816	RP11-46A10.2-001,RP11-46A10.2-002	1	180875865	180875968	70.38	0.044	0.01	0.032	0.01	3	rs4382679,rs142697037,rs183708760	0	0.01	0	-0.97	#-nan	-0.97
AC006129.2	RP11-46A10.4	RP11-46A10.4	RP11-46A10.4-001	1	180925607	180925695	62.64	0	0	0	0						#-nan	#-nan	#-nan
AC006129.2	RP11-46A10.5	RP11-46A10.5	RP11-46A10.5-001	1	180945317	180945407	63.47	0	0	0	0						#-nan	#-nan	#-nan
AC006129.2	RP11-533E19.7,TOR1AIP1	RP11-533E19.7,TOR1AIP1	RP11-533E19.7-001,TOR1AIP1-001,TOR1AIP1-003,TOR1AIP1-004,TOR1AIP1-006,TOR1AIP1-007,TOR1AIP1-008,TOR1AIP1-011,TOR1AIP1-012,TOR1AIP1-013,TOR1AIP1-014,TOR1AIP1-015	1	179851655	179851771	81.06	0.009	0	0.018	0	1	rs200098735	#-nan	0	0	#-nan	-0.02	#-nan
AC006129.2	RP11-536C5.2	RP11-536C5.2	RP11-536C5.2-001	1	160031590	160031722	91.49	0.008	0	0.016	0	1	rs112553784	0.05	0.05	0.05	#-nan	#-nan	-0.45
AC006129.2	RP11-545I10.2	RP11-545I10.2	RP11-545I10.2-001	1	170559888	170559987	69.86	0.015	0.033	0.087	0	6	.,.,.,.,.,.	0.08	0.07	0.06	0.44	0.76	0.64
AC006129.2	SCYL3	SCYL3	SCYL3-001,SCYL3-002,SCYL3-004,SCYL3-201	1	169862771	169862885	82.78	0	0	0.011	0	1	rs4656727	0	0.02	0.02	-0.19	0.57	-0.14
AC006129.2	SCYL3	SCYL3	SCYL3-001,SCYL3-002,SCYL3-004,SCYL3-201	1	169862765	169862861	69.64	0	0	0.011	0	1	rs4656727	0	0.02	0.02	-0.19	0.57	-0.14
AC006129.2	SEC16B	SEC16B	SEC16B-005	1	177919969	177920134	118.37	0.022	0	0	0						#-nan	#-nan	#-nan
AC006129.2	SEC16B	SEC16B	SEC16B-013	1	177956114	177956215	67.54	0.021	0.01	0.047	0	3	rs6425462,rs6425461,rs185500449	0.55	0.48	0.45	-0.25	-0.51	1.91
AC006129.2	SELE	SELE	SELE-001,SELE-002,SELE-003,SELE-004,SELE-005,SELE-006,SELE-201,SELE-202,SELE-203,SELE-204	1	169701807	169701916	75.6	0.009	0.019	0.041	0.019	3	rs1800015,rs1800016,rs138495022	0.05	0	0.06	0.21	-1.21	-1.32
AC006129.2	SELL	SELL	SELL-001,SELL-002,SELL-003,SELL-004	1	169680985	169681129	102.67	0.007	0	0.007	0						#-nan	#-nan	#-nan
AC006129.2	SELP	SELP	SELP-002	1	169590366	169590688	231.98	0	0.017	0.01	0	3	rs12067152,rs186472141,.	0.06	0.12	0.08	-0.31	0.61	-1.21
AC006129.2	SFT2D2	SFT2D2	SFT2D2-001,SFT2D2-002,SFT2D2-003,SFT2D2-201	1	168195291	168195381	62.58	0.024	0.021	0.021	0	3	rs149372218,rs144712503,rs201418769	0.01	0	0	#-nan	-1.25	-0.9
AC006129.2	SHCBP1L	SHCBP1L	SHCBP1L-001,SHCBP1L-002,SHCBP1L-003,SHCBP1L-004,SHCBP1L-005,SHCBP1L-201	1	182922406	182922530	85.7	0	0	0	0						#-nan	#-nan	#-nan
AC006129.2	SHCBP1L	SHCBP1L	SHCBP1L-001,SHCBP1L-002,SHCBP1L-003,SHCBP1L-004,SHCBP1L-005,SHCBP1L-201	1	182922406	182922531	86.11	0	0	0	0						#-nan	#-nan	#-nan
AC006129.2	SHISA4	SHISA4	SHISA4-001,SHISA4-002,SHISA4-003	1	201858046	201858133	62.2	0	0	0.012	0						#-nan	#-nan	#-nan
AC006129.2	SHISA4	SHISA4	SHISA4-001,SHISA4-002,SHISA4-003	1	201857829	201857916	60.44	0	0	0.012	0	1	rs145964488	0.03	0.03	0.03	#-nan	#-nan	0.38
AC006129.2	SMG7,SMG7-AS1	SMG7,SMG7-AS1	SMG7-001,SMG7-002,SMG7-003,SMG7-005,SMG7-008,SMG7-010,SMG7-011,SMG7-013,SMG7-014,SMG7-015,SMG7-017,SMG7-201,SMG7-AS1-001,SMG7-AS1-002,SMG7-AS1-003(*)	1	183441501	183441595	67.82	0	0	0	0						#-nan	#-nan	#-nan
AC006129.2	SMG7	SMG7	SMG7-006,SMG7-009	1	183518473	183518564	60.3	0.011	0	0.011	0						#-nan	#-nan	#-nan
AC006129.2	STX6	STX6	STX6-001,STX6-201	1	180992200	180992314	80.51	0.127	0.066	0.04	0.009	1	.	0.15	0	0.1	-0.9	-0.9	-0.79
AC006129.2	SWT1,TRMT1L	SWT1,TRMT1L	SWT1-001,SWT1-002,SWT1-003,TRMT1L-001,TRMT1L-002,TRMT1L-201	1	185126509	185126680	123.55	0.006	0	0	0						#-nan	#-nan	#-nan
AC006129.2	TADA1	TADA1	TADA1-001	1	166844968	166845082	81.65	0.019	0.009	0.009	0.019	1	rs2072740	0.01	0.08	0.04	1.81	1.96	1.56
AC006129.2	TBX19	TBX19	TBX19-003	1	168267906	168268144	164.36	0.122	0.013	0.037	0	5	rs141504166,rs12066591,.,rs12756931,.	0.15	0.05	0.1	-1.14	0.6	0.84
AC006129.2	TIMM17A	TIMM17A	TIMM17A-001,TIMM17A-003,TIMM17A-004	1	201924207	201924307	71.14	0.117	0	0	0						#-nan	#-nan	#-nan
AC006129.2	TMCO1,UCK2	TMCO1,UCK2	TMCO1-006,UCK2-001,UCK2-201	1	165797198	165797359	117.38	0.02	0.013	0.013	0.006	2	rs7518418,rs143863367	0.24	0.1	0.14	#-nan	-0.32	1.17
AC006129.2	TMCO1,UCK2	TMCO1,UCK2	TMCO1-006,UCK2-001,UCK2-201	1	165796948	165797085	97.13	0.02	0.013	0.013	0.006						#-nan	#-nan	#-nan
AC006129.2	TNR	TNR	TNR-002	1	175375304	175375419	79.8	0	0.021	0.021	0	1	rs859400	0.06	0	0.04	1.68	1.92	1.93
AC006129.2	TOR3A	TOR3A	TOR3A-001,TOR3A-002,TOR3A-003,TOR3A-004,TOR3A-005,TOR3A-006,TOR3A-007	1	179051569	179051674	78.14	0.032	0	0	0						#-nan	#-nan	#-nan
AC006129.2	TROVE2,UCHL5,snoU109.3	RO60,UCHL5,snoU109.3	TROVE2-001,TROVE2-003,TROVE2-004,TROVE2-005,TROVE2-006,TROVE2-007,TROVE2-008,TROVE2-009,TROVE2-010,TROVE2-011,TROVE2-201,UCHL5-001,UCHL5-002,UCHL5-003,UCHL5-004,UCHL5-006,UCHL5-007,UCHL5-010,UCHL5-011,UCHL5-013,UCHL5-201,UCHL5-202,snoU109.3-201	1	193028812	193028903	65.66	0.029	0	0	0	1	.	#-nan	0	0	#-nan	-0.96	#-nan
AC006129.2	TSEN15	TSEN15	TSEN15-001,TSEN15-002,TSEN15-003,TSEN15-004,TSEN15-005,TSEN15-006,TSEN15-007	1	184021022	184021110	63.51	0	0	0.018	0						#-nan	#-nan	#-nan
AC006129.2	TSEN15	TSEN15	TSEN15-001,TSEN15-002,TSEN15-003,TSEN15-004,TSEN15-005,TSEN15-006,TSEN15-007	1	184021032	184021149	83.81	0	0	0.018	0	2	rs58073693,rs181680710	0.05	0.06	0.05	-0.97	#-nan	-0.38
AC006129.2	USF1	USF1	USF1-001,USF1-004,USF1-006,USF1-007,USF1-008,USF1-010,USF1-201	1	161018294	161018413	84.35	0.009	0	0	0						#-nan	#-nan	#-nan
AC006129.2	VANGL2	VANGL2	VANGL2-001	1	160371371	160371544	120.96	0.006	0	0.006	0	1	rs116567380	0.01	0.01	0.01	#-nan	#-nan	-0.9
AC006129.2	VANGL2	VANGL2	VANGL2-002	1	160388669	160388756	61.34	0.012	0.021	0.021	0						#-nan	#-nan	#-nan
AC006129.2	XPR1	XPR1	XPR1-001,XPR1-002	1	180601145	180601290	103.09	0	0	0.022	0	3	rs116042397,rs111298273,rs181226124	0.06	0.08	0.07	-0.9	#-nan	-0.96
AC006129.2	ZNF281	ZNF281	ZNF281-001,ZNF281-002,ZNF281-003	1	200378859	200378946	62.21	0.012	0.021	0.021	0	2	rs111562895,rs74484749	0.14	0.15	0.14	#-nan	#-nan	-0.12
AC006129.2	A1CF,RP11-449O16.2	A1CF,RP11-449O16.2	A1CF-007,RP11-449O16.2-001	10	52587687	52587780	60.98	0.015	0	0.065	0	3	rs12260777,rs189654828,rs79307060	0.08	0.08	0.08	#-nan	-0.37	-0.21
AC006129.2	ABI1	ABI1	ABI1-001,ABI1-002,ABI1-003,ABI1-004,ABI1-005,ABI1-006,ABI1-007,ABI1-009,ABI1-201,ABI1-202,ABI1-203,ABI1-204,ABI1-205,ABI1-206	10	27152760	27152908	105.84	0.015	0	0.014	0	1	rs2505968	0.47	0.14	0.28	1.79	1.51	-0.14
AC006129.2	ABLIM1	ABLIM1	ABLIM1-002,ABLIM1-005,ABLIM1-201,ABLIM1-203	10	116443547	116443656	73.16	0	0	0.009	0						#-nan	#-nan	#-nan
AC006129.2	AC016821.2	AC016821.2	AC016821.2-201(*)	10	71215285	71215385	68.31	0	0	0	0	1	.	0.06	0.02	0.03	1.36	0.25	1.02
AC006129.2	AC244230.1	AGAP14P	AC244230.1-201(*)	10	47706556	47706644	61.77	0	0	0	0						#-nan	#-nan	#-nan
AC006129.2	ACADSB,IKZF5	ACADSB,IKZF5	ACADSB-001,ACADSB-004,IKZF5-001,IKZF5-002,IKZF5-003,IKZF5-004	10	124767982	124768157	123.54	0.012	0.006	0.012	0.006	1	rs2277249	0.12	0.12	0.23	1.56	0.77	1.88
AC006129.2	ACBD5,RP11-85G18.6	ACBD5,RP11-85G18.6	ACBD5-001,ACBD5-002,ACBD5-003,ACBD5-004,ACBD5-005,ACBD5-006,ACBD5-007,ACBD5-201,RP11-85G18.6-001	10	27529625	27529868	174.53	0.015	0.004	0.004	0.004	1	rs12571873	0.06	0.03	0.07	#-nan	0.48	-0.32
AC006129.2	ACBD5,RP11-85G18.6	ACBD5,RP11-85G18.6	ACBD5-001,ACBD5-002,ACBD5-003,ACBD5-004,ACBD5-005,ACBD5-006,ACBD5-007,ACBD5-201,RP11-85G18.6-001	10	27529614	27529823	150.34	0.015	0.004	0.004	0.004						#-nan	#-nan	#-nan
AC006129.2	ACBD7	ACBD7	ACBD7-001,ACBD7-002	10	15130385	15130478	68.38	0.024	0.021	0.021	0	3	rs4565803,rs72774385,rs192886015	0.17	0.2	0.15	-1.22	-0.48	0.11
AC006129.2	ADAM12	ADAM12	ADAM12-001,ADAM12-002,ADAM12-003	10	128076674	128076792	84.24	0.009	0	0	0						#-nan	#-nan	#-nan
AC006129.2	ADAM12	ADAM12	ADAM12-005	10	127846735	127846845	79.06	0.01	0.01	0.02	0.02						#-nan	#-nan	#-nan
AC006129.2	ADAM8	ADAM8	ADAM8-002,ADAM8-010	10	135087917	135088033	82.22	0.469	0	0.018	0						#-nan	#-nan	#-nan
AC006129.2	ADAM8	ADAM8	ADAM8-011	10	135078484	135078674	137.97	0.053	0	0.005	0	1	.	0.01	0.01	0.01	#-nan	#-nan	-0.9
AC006129.2	ADAMTS14	ADAMTS14	ADAMTS14-001,ADAMTS14-002	10	72432363	72432460	68.16	0.01	0	0	0						#-nan	#-nan	#-nan
AC006129.2	ADARB2	ADARB2	ADARB2-001	10	1779177	1779368	135.47	0.011	0	0.005	0	1	rs3750684	0.07	0.16	0.21	1.66	0.81	1.93
AC006129.2	ADARB2-AS1	ADARB2-AS1	ADARB2-AS1-001,ADARB2-AS1-002	10	1567984	1568191	142.42	0.087	0	0	0	2	rs12414306,rs938697	0	0.13	0.13	#-nan	0.57	-1.31
AC006129.2	ADD3	ADD3	ADD3-001,ADD3-002,ADD3-005,ADD3-006,ADD3-009,ADD3-013,ADD3-014,ADD3-015,ADD3-201(*)	10	111767427	111767518	65.66	0.012	0	0.012	0						#-nan	#-nan	#-nan
AC006129.2	ADIRF-AS1,MMRN2,RP11-96C23.15,RP11-96C23.5	ADIRF-AS1,MMRN2,RP11-96C23.15,RP11-96C23.5	ADIRF-AS1-001,ADIRF-AS1-002,ADIRF-AS1-003,ADIRF-AS1-004,MMRN2-002,MMRN2-008,RP11-96C23.15-001,RP11-96C23.5-001	10	88729999	88730105	77.53	0	0	0	0						#-nan	#-nan	#-nan
AC006129.2	ADIRF-AS1,MMRN2,RP11-96C23.5	ADIRF-AS1,MMRN2,RP11-96C23.5	ADIRF-AS1-001,ADIRF-AS1-002,ADIRF-AS1-003,ADIRF-AS1-004,MMRN2-002,MMRN2-008,RP11-96C23.5-001	10	88729992	88730080	63.51	0	0	0	0						#-nan	#-nan	#-nan
AC006129.2	ADIRF-AS1,MMRN2,RP11-96C23.5,RP11-96C23.15	ADIRF-AS1,MMRN2,RP11-96C23.5,RP11-96C23.15	ADIRF-AS1-001,ADIRF-AS1-002,ADIRF-AS1-003,ADIRF-AS1-004,MMRN2-002,MMRN2-008,RP11-96C23.5-001,RP11-96C23.15-001(*)	10	88729993	88730082	63.94	0	0	0	0						#-nan	#-nan	#-nan
AC006129.2	ADK,AP3M1	ADK,AP3M1	ADK-001,ADK-004,ADK-201,AP3M1-001,AP3M1-002,AP3M1-004	10	75910975	75911076	71.57	0.024	0.216	0.148	0						#-nan	#-nan	#-nan
AC006129.2	ADO,RP11-436D10.3	ADO,RP11-436D10.3	ADO-001,RP11-436D10.3-001	10	64564679	64564787	76.02	0	0	0.01	0	1	rs146318332	0.01	0.01	0.01	#-nan	#-nan	-0.83
AC006129.2	ADRB1	ADRB1	ADRB1-001	10	115803170	115803350	128.23	0.006	0	0	0						#-nan	#-nan	#-nan
AC006129.2	AFAP1L2	AFAP1L2	AFAP1L2-003	10	116061936	116062030	63.24	0	0	0	0						#-nan	#-nan	#-nan
AC006129.2	AFAP1L2	AFAP1L2	AFAP1L2-004	10	116065584	116065789	142.8	10	0	0.01	0	2	rs28564363,.	0.15	0	0.08	-0.68	1.31	1.28
AC006129.2	AGAP4	AGAP4	AGAP4-001,AGAP4-002,AGAP4-005,AGAP4-203(*)	10	46344574	46344678	72.66	0.032	0	0	0						#-nan	#-nan	#-nan
AC006129.2	AGAP6	AGAP6	AGAP6-001,AGAP6-201,AGAP6-202(*)	10	51746599	51746684	60.49	0.027	0	0	0						#-nan	#-nan	#-nan
AC006129.2	AIFM2	AIFM2	AIFM2-003	10	71880948	71881047	69.72	0.012	0.021	0.021	0	1	rs142293692	0.01	0.01	0.01	#-nan	#-nan	-0.9
AC006129.2	AKR1C3	AKR1C3	AKR1C3-002,AKR1C3-003,AKR1C3-007	10	5074654	5074745	63.9	0.023	0	0.011	0	1	rs7088426	0.01	0	0	1.63	1.86	1.86
AC006129.2	AKR1E2	AKR1E2	AKR1E2-001,AKR1E2-012	10	4874870	4874966	64.72	0	0.021	0.021	0	3	rs2123354,.,rs114090447	0.04	0.02	0.04	1.26	-0.05	-0.46
AC006129.2	AL022344.4	AL022344.4	AL022344.4-001	10	43186660	43186876	150.78	0	0	0	0	4	rs549167,rs12253566,rs12256401,rs145868788	0.1	0.15	0.1	-0.97	-1.29	-0.66
AC006129.2	AL157399.1	AL157399.1	AL157399.1-201(*)	10	53284849	53285006	110.76	0	0	0	0						#-nan	#-nan	#-nan
AC006129.2	AL353664.1	AL353664.1	AL353664.1-201	10	121886604	121886704	69.14	0.032	0.01	0.01	0	1	rs10886604	0.32	0.34	0.33	#-nan	#-nan	1.61
AC006129.2	AL355531.1	AL355531.1	AL355531.1-201(*)	10	131286170	131286276	72.45	0	0	0	0	4	rs151249427,rs182606715,rs61859817,.	0.05	0.04	0.04	0.46	1.23	0.47
AC006129.2	AL359832.1,UNC5B	AL359832.1,UNC5B	AL359832.1-201,UNC5B-001,UNC5B-002	10	72972626	72972710	61.76	0	0	0	0						#-nan	#-nan	#-nan
AC006129.2	AL359878.1,GTPBP4,RP11-363N22.3	AL359878.1,GTPBP4,RP11-363N22.3	AL359878.1-201,GTPBP4-001,GTPBP4-002,GTPBP4-006,GTPBP4-201,GTPBP4-202,RP11-363N22.3-002(*)	10	1033984	1034101	81.14	0.03	0.018	0.028	0.018	3	rs1250884,rs4881550,rs4881549	0	0	0	-0.5	-0.57	-0.52
AC006129.2	AL391421.1	AL391421.1	AL391421.1-201	10	79624114	79624220	72.45	0	0	0	0						#-nan	#-nan	#-nan
AC006129.2	AL391839.1,EPC1,RP11-135A24.2	AL391839.1,EPC1,EPC1-AS1	AL391839.1-201,EPC1-002,EPC1-004,EPC1-005,EPC1-006,EPC1-009,RP11-135A24.2-001	10	32636164	32636270	77.7	0.02	0	0.026	0	1	rs151201938	0.15	0.16	0.15	#-nan	#-nan	0.54
AC006129.2	AL603965.1,ANXA8L2,ANXA8L1	AL603965.1,ANXA8L2,ANXA8L1	AL603965.1-201,ANXA8L2-001,ANXA8L2-002,ANXA8L2-201,ANXA8L2-202,ANXA8L1-001(*),ANXA8L1-002(*),ANXA8L1-003(*),ANXA8L1-004(*),ANXA8L1-005(*)	10	47746355	47746448	64.68	0	0	0	0	1	.	0.01	0.02	0.01	1.51	1.89	0.68
AC006129.2	AL603965.1,ANXA8L2,ANXA8L1	AL603965.1,ANXA8L2,ANXA8L1	AL603965.1-201,ANXA8L2-001,ANXA8L2-002,ANXA8L2-201,ANXA8L2-202,ANXA8L1-201(*),ANXA8L1-202(*)	10	47746357	47746448	63.84	0	0	0	0	1	.	0.01	0.02	0.01	1.51	1.89	0.68
AC006129.2	AL731568.1	AL731568.1	AL731568.1-201	10	77583466	77583550	60.07	0.017	0.012	0	0						#-nan	#-nan	#-nan
AC006129.2	AL732375.1	AL732375.1	AL732375.1-201(*)	10	135483597	135483696	70.85	0	0	0	0						#-nan	#-nan	#-nan
AC006129.2	AL732375.2	AL732375.2	AL732375.2-201(*)	10	135493515	135493614	69.86	0	0	0	0						#-nan	#-nan	#-nan
AC006129.2	AL732375.4	AL732375.4	AL732375.4-201(*)	10	135486906	135487005	69.86	0	0	0	0						#-nan	#-nan	#-nan
AC006129.2	AL732375.6	AL732375.6	AL732375.6-201(*)	10	135498458	135498558	69.3	0	0	0	0						#-nan	#-nan	#-nan
AC006129.2	AL732375.7	AL732375.7	AL732375.7-201(*)	10	135491849	135491949	68.31	0	0	0	0						#-nan	#-nan	#-nan
AC006129.2	AL845259.4	AL845259.4	AL845259.4-201(*)	10	135480287	135480386	71.83	0	0	0	0						#-nan	#-nan	#-nan
AC006129.2	AL845259.8	AL845259.8	AL845259.8-201(*)	10	135478621	135478717	65.69	0	0	0	0						#-nan	#-nan	#-nan
AC006129.2	ALOX5	ALOX5	ALOX5-001,ALOX5-201,ALOX5-202(*)	10	45869509	45869620	78.12	0.031	0.009	0	0						#-nan	#-nan	#-nan
AC006129.2	ANK3,RP11-131N11.4	ANK3,ANK3-DT	ANK3-004,ANK3-018,RP11-131N11.4-001	10	62492983	62493069	61.78	0.013	0	0.014	0						#-nan	#-nan	#-nan
AC006129.2	ANK3,RP11-131N11.4	ANK3,ANK3-DT	ANK3-004,ANK3-018,RP11-131N11.4-001	10	62492897	62493054	112.32	0.013	0	0.014	0	2	rs193275676,rs185421325	0.02	0.02	0.02	#-nan	-0.77	-0.77
AC006129.2	ANK3	ANK3	ANK3-010	10	62061037	62061178	95.47	0.22	0.007	0.039	0	5	rs112521857,.,rs117428636,rs138651478,rs10761474	0.08	0.02	0.06	-0.53	-0.2	-0.16
AC006129.2	ANKRD16,FBXO18	ANKRD16,FBH1	ANKRD16-001,ANKRD16-002,ANKRD16-003,ANKRD16-005,FBXO18-009,FBXO18-012,FBXO18-013,FBXO18-201	10	5932428	5932585	113.18	0.051	0.006	0.013	0.006	2	rs10905405,rs10905406	0.2	0.57	0.37	2.05	1.84	-0.32
AC006129.2	ANKRD16,FBXO18	ANKRD16,FBH1	ANKRD16-001,ANKRD16-002,ANKRD16-003,ANKRD16-005,FBXO18-009,FBXO18-012,FBXO18-013,FBXO18-201	10	5932220	5932327	75.83	0.051	0.006	0.013	0.006						#-nan	#-nan	#-nan
AC006129.2	ANTXRL,RP11-292F22.7	ANTXRL,RP11-292F22.7	ANTXRL-001,ANTXRL-002,ANTXRL-005,ANTXRL-201,RP11-292F22.7-001,ANTXRL-003(*)	10	47655487	47655630	101.39	0.068	0.031	0.023	0.023	3	rs79488713,rs188359755,rs79248527	0.05	0.05	0.09	-1.49	0.67	0.11
AC006129.2	ANTXRL	ANTXRL	ANTXRL-004	10	47669386	47669477	64.75	0	0	0.011	0	1	rs145325538	#-nan	0	0	#-nan	1.3	#-nan
AC006129.2	ANTXRL	ANTXRL	ANTXRL-006,ANTXRL-005(*)	10	47664439	47664755	221.34	0	0	0	0	3	rs10546433,rs183420854,rs12770509	0.1	0	0.07	0.52	0.93	-0.9
AC006129.2	ANXA11,LINC00857	ANXA11,LINC00857	ANXA11-001,ANXA11-002,ANXA11-003,ANXA11-007,ANXA11-008,ANXA11-201,ANXA11-202,ANXA11-203,ANXA11-204,LINC00857-001,LINC00857-002	10	81965193	81965354	115.78	0.064	0.028	0.035	0.006	3	rs71720102,rs11542747,rs112034834	0.08	0.31	0.18	-0.82	-1.21	-0.83
AC006129.2	ANXA11	ANXA11	ANXA11-009	10	81930153	81930246	64.68	0.024	0.021	0.021	0	1	rs73299531	0.01	0.01	0.01	#-nan	#-nan	-0.12
AC006129.2	ANXA7	ANXA7	ANXA7-001,ANXA7-002,ANXA7-003,ANXA7-201	10	75173712	75173808	68.59	0.035	0	0.034	0	2	rs7921604,rs188871914	0.14	0.15	0.14	#-nan	#-nan	-0.24
AC006129.2	ANXA8	ANXA8	ANXA8-001,ANXA8-002,ANXA8-003,ANXA8-004,ANXA8-005,ANXA8-201,ANXA8-202(*)	10	48254671	48254764	63.76	0.032	0	0	0						#-nan	#-nan	#-nan
AC006129.2	APBB1IP	APBB1IP	APBB1IP-001,APBB1IP-003	10	26727913	26728006	64.58	0	0	0.011	0	1	rs2992335	0	0.4	0.25	1.91	-0.31	1.95
AC006129.2	APBB1IP	APBB1IP	APBB1IP-002	10	26849928	26850028	71.14	0.021	0	0	0	1	.	0.03	0.02	0.01	-0.01	1.79	0.59
AC006129.2	ARHGAP12	ARHGAP12	ARHGAP12-005	10	32143946	32144054	78.19	0.009	0.009	0.009	0	1	.	0.04	0.22	0.12	1.76	1.87	1.13
AC006129.2	ARHGAP12	ARHGAP12	ARHGAP12-008,ARHGAP12-009,ARHGAP12-201,ARHGAP12-202	10	32217393	32217514	83.63	0.009	0.009	0.009	0.009	2	rs200149718,rs7096139	0.06	0.09	0.06	1.87	1.94	1.84
AC006129.2	ARHGAP19,ARHGAP19-SLIT1	ARHGAP19,ARHGAP19-SLIT1	ARHGAP19-004,ARHGAP19-006,ARHGAP19-SLIT1-001,ARHGAP19-SLIT1-201,ARHGAP19-SLIT1-202,ARHGAP19-SLIT1-203,ARHGAP19-003(*)	10	99052108	99052241	95.04	0.067	0	0.025	0	3	rs11189105,rs28434206,rs12356559	0.08	0.1	0.09	-0.37	#-nan	-0.49
AC006129.2	ARHGAP21	ARHGAP21	ARHGAP21-001,ARHGAP21-002,ARHGAP21-003,ARHGAP21-007,ARHGAP21-008,ARHGAP21-011,ARHGAP21-012	10	25011671	25011764	66.53	0.076	0.01	0.01	0						#-nan	#-nan	#-nan
AC006129.2	ARHGAP21	ARHGAP21	ARHGAP21-001,ARHGAP21-002,ARHGAP21-003,ARHGAP21-007,ARHGAP21-008,ARHGAP21-011,ARHGAP21-012,ARHGAP21-201(*)	10	25012504	25012714	152.86	0.076	0.01	0.01	0						#-nan	#-nan	#-nan
AC006129.2	ARHGAP21	ARHGAP21	ARHGAP21-001,ARHGAP21-002,ARHGAP21-003,ARHGAP21-007,ARHGAP21-008,ARHGAP21-011,ARHGAP21-012,ARHGAP21-202(*)	10	25013839	25013935	68.59	0.076	0.01	0.01	0						#-nan	#-nan	#-nan
AC006129.2	ARHGAP22	ARHGAP22	ARHGAP22-003	10	49703849	49703955	74.34	0.031	0	0.02	0	2	rs4838412,rs79191288	0	0.05	0.02	0.2	1.69	0.9
AC006129.2	ARHGAP22	ARHGAP22	ARHGAP22-004,ARHGAP22-008,ARHGAP22-012	10	49862866	49863105	164.77	0.112	0.054	0.06	0	2	rs116743493,rs138429049	0.01	0.02	0.01	1.7	1.51	-0.11
AC006129.2	ARHGAP22	ARHGAP22	ARHGAP22-007	10	49659713	49659826	78.96	0.018	0	0.018	0	2	rs180780062,rs186019715	0.01	0.01	0.01	#-nan	#-nan	-1.21
AC006129.2	ARHGAP22	ARHGAP22	ARHGAP22-014	10	49674407	49674494	61.34	0.025	0	0.012	0	1	.	0	0	0	-0.97	-0.96	-0.97
AC006129.2	ARHGAP22	ARHGAP22	ARHGAP22-015	10	49688975	49689063	62.62	0.012	0	0.053	0	5	rs116280829,rs75228923,rs139881171,rs114968965,rs145324213	0.11	0.12	0.12	#-nan	#-nan	-0.64
AC006129.2	ARMC3	ARMC3	ARMC3-001,ARMC3-007,ARMC3-008,ARMC3-009,ARMC3-010,ARMC3-011,ARMC3-012,ARMC3-013,ARMC3-014,ARMC3-201	10	23218138	23218249	76.18	0.555	0.019	0	0	1	.	0.07	0.07	0.07	#-nan	#-nan	-0.97
AC006129.2	ARMC4,RP11-218D6.4	ODAD2,RP11-218D6.4	ARMC4-001,ARMC4-004,RP11-218D6.4-001	10	28287385	28287542	111.61	0.028	0.007	0.006	0	1	rs184897637	0.01	0.01	0.01	#-nan	#-nan	-0.83
AC006129.2	ARMC4	ODAD2	ARMC4-002,ARMC4-201	10	28277289	28277394	71.81	0.033	0	0.031	0	3	rs115088009,rs4579844,rs183551392	0.04	0.02	0.03	#-nan	-0.77	-1.05
AC006129.2	ARMS2	ARMS2	ARMS2-001	10	124211839	124211932	61.78	0.012	0.011	0.011	0	1	rs56696292	0.08	0.04	0.04	1.77	1.92	1.84
AC006129.2	AS3MT	AS3MT	AS3MT-001,AS3MT-201(*)	10	104629273	104629373	73.15	0.079	0	0	0						#-nan	#-nan	#-nan
AC006129.2	ASB13	ASB13	ASB13-004,ASB13-005,ASB13-006	10	5708458	5708630	124.83	0.006	0	0.006	0	1	rs151292626	0.01	#-nan	0.01	-0.83	#-nan	#-nan
AC006129.2	ASCC1	ASCC1	ASCC1-015	10	73957811	73958025	155.49	0.838	0.031	0.025	0						#-nan	#-nan	#-nan
AC006129.2	ATE1,ATE1-AS1	ATE1,ATE1OSP	ATE1-001,ATE1-002,ATE1-006,ATE1-201,ATE1-202,ATE1-203,ATE1-204,ATE1-205,ATE1-AS1-001	10	123687710	123687800	64.33	0.033	0	0.007	0						#-nan	#-nan	#-nan
AC006129.2	ATE1,ATE1-AS1	ATE1,ATE1OSP	ATE1-001,ATE1-002,ATE1-006,ATE1-201,ATE1-202,ATE1-203,ATE1-204,ATE1-205,ATE1-AS1-001	10	123687449	123687597	105.84	0.033	0	0.007	0	1	rs79570924	0	0	0	0.16	0	0.4
AC006129.2	ATE1,ATE1-AS1	ATE1,ATE1OSP	ATE1-001,ATE1-002,ATE1-006,ATE1-201,ATE1-202,ATE1-203,ATE1-204,ATE1-205,ATE1-AS1-001	10	123687457	123687598	100.54	0.033	0	0.007	0						#-nan	#-nan	#-nan
AC006129.2	ATP5C1,KIN	ATP5F1C,KIN	ATP5C1-001,ATP5C1-002,ATP5C1-003,ATP5C1-004,ATP5C1-005,ATP5C1-006,ATP5C1-007,ATP5C1-008,ATP5C1-201,KIN-001,KIN-201,KIN-202	10	7830064	7830174	76.86	0.009	0	0.01	0	1	rs2070594	0.09	0.04	0.04	1.36	1.04	0.08
AC006129.2	ATRNL1	ATRNL1	ATRNL1-001,ATRNL1-002,ATRNL1-003,ATRNL1-005,ATRNL1-009	10	116852743	116852893	108.43	0.022	0	0	0						#-nan	#-nan	#-nan
AC006129.2	BAG3	BAG3	BAG3-001	10	121411345	121411441	69.64	0	0	0.011	0	1	rs112546447	0.01	0.01	0.01	#-nan	#-nan	0.83
AC006129.2	BAG3	BAG3	BAG3-002	10	121415834	121415933	70.85	0.021	0	0	0						#-nan	#-nan	#-nan
AC006129.2	BAMBI	BAMBI	BAMBI-001,BAMBI-002	10	28966344	28966456	81.91	0	0	0	0						#-nan	#-nan	#-nan
AC006129.2	BBIP1,SHOC2	BBIP1,SHOC2	BBIP1-001,BBIP1-002,BBIP1-003,BBIP1-004,BBIP1-005,BBIP1-006,BBIP1-007,BBIP1-008,BBIP1-010,SHOC2-001,SHOC2-003,SHOC2-004,SHOC2-005,SHOC2-201	10	112679639	112679803	119.57	0.032	0.021	0.021	0	1	rs185728469	0	0	0.01	#-nan	-0.77	-0.97
AC006129.2	BBIP1,SHOC2	BBIP1,SHOC2	BBIP1-001,BBIP1-002,BBIP1-003,BBIP1-004,BBIP1-005,BBIP1-006,BBIP1-007,BBIP1-008,BBIP1-010,SHOC2-001,SHOC2-003,SHOC2-004,SHOC2-005,SHOC2-201	10	112679634	112679802	122.2	0.032	0.021	0.021	0	1	rs185728469	0	0	0.01	#-nan	-0.77	-0.97
AC006129.2	BEND7	BEND7	BEND7-001,BEND7-002	10	13545189	13545318	89.88	0	0	0.044	0	1	rs74122777	0.01	0.01	0.01	#-nan	#-nan	-0.9
AC006129.2	BEND7,RP11-214D15.2	BEND7,BEND7-DT	BEND7-005,BEND7-201,BEND7-202,RP11-214D15.2-001	10	13570914	13571062	105.84	1.318	0	0.014	0						#-nan	#-nan	#-nan
AC006129.2	BEND7	BEND7	BEND7-008,BEND7-009	10	13497512	13497612	70.14	0.06	0	0	0						#-nan	#-nan	#-nan
AC006129.2	BICC1	BICC1	BICC1-002	10	60272492	60272595	74.3	0	0	0	0						#-nan	#-nan	#-nan
AC006129.2	BLNK	BLNK	BLNK-001,BLNK-002,BLNK-003,BLNK-004,BLNK-201,BLNK-202	10	98032562	98032663	71.57	0.014	0	0.06	0	2	rs145824782,rs188511934	0.02	0.02	0.02	#-nan	-0.9	-0.7
AC006129.2	BLNK	BLNK	BLNK-006	10	97965719	97965813	64.17	0.011	0	0.011	0						#-nan	#-nan	#-nan
AC006129.2	BMI1	BMI1	BMI1-001,BMI1-002,BMI1-009,BMI1-011	10	22610657	22610913	184.46	0.093	0	0	0						#-nan	#-nan	#-nan
AC006129.2	BMI1	BMI1	BMI1-005,BMI1-006,BMI1-007,BMI1-008,BMI1-010,BMI1-012	10	22614410	22614588	127.44	0.013	0	0.006	0	1	rs11012946	0.17	0.18	0.17	#-nan	#-nan	0.68
AC006129.2	BMPR1A,RP11-359E3.4	BMPR1A,RP11-359E3.4	BMPR1A-001,RP11-359E3.4-001	10	88516790	88516903	82.34	0.009	0	0.009	0	1	rs79181991	0.01	0.02	0.02	#-nan	#-nan	-0.77
AC006129.2	BNIP3	BNIP3	BNIP3-001,BNIP3-201	10	133795443	133795597	109.48	0	0	0	0						#-nan	#-nan	#-nan
AC006129.2	C10orf107	CABCOCO1	C10orf107-001,C10orf107-002	10	63422556	63422646	64.33	0.024	0	0	0						#-nan	#-nan	#-nan
AC006129.2	C10orf107	CABCOCO1	C10orf107-001,C10orf107-002	10	63422896	63422984	62.62	0.024	0	0	0						#-nan	#-nan	#-nan
AC006129.2	C10orf11	LRMDA	C10orf11-008	10	78221817	78221912	66.36	0.036	0	0.011	0	1	.	0.06	0.08	0.07	1.93	-0.9	-1.31
AC006129.2	C10orf11	LRMDA	C10orf11-011	10	77405634	77405742	76.02	0	0	0.01	0	1	rs140456639	0.02	0.02	0.01	-0.9	1.9	-0.77
AC006129.2	C10orf111,RPP38	RPP38-DT,RPP38	C10orf111-001,RPP38-001,RPP38-002,RPP38-003,RPP38-004,RPP38-005,RPP38-006	10	15139312	15139417	76.21	0.031	0.021	0.021	0	3	rs116417161,rs187243154,rs117151080	0.02	0.02	0.02	-0.76	#-nan	-1.03
AC006129.2	C10orf128	TMEM273	C10orf128-007	10	50374635	50374721	60.06	0.012	0	0.012	0						#-nan	#-nan	#-nan
AC006129.2	C10orf131,ENTPD1-AS1	C10orf131,ENTPD1-AS1	C10orf131-001,C10orf131-002,ENTPD1-AS1-005,ENTPD1-AS1-006,ENTPD1-AS1-007,ENTPD1-AS1-008	10	97667303	97667499	139.3	0.022	0.011	0.023	0.011	2	rs10882685,rs35228177	0.22	0.19	0.17	-0.27	0.15	0.02
AC006129.2	C10orf131,ENTPD1-AS1	C10orf131,ENTPD1-AS1	C10orf131-001,C10orf131-002,ENTPD1-AS1-005,ENTPD1-AS1-006,ENTPD1-AS1-007,ENTPD1-AS1-008	10	97667642	97667741	70.85	0.022	0.011	0.023	0.011	2	rs7906654,rs61871075	0	0.31	0.21	0.64	0.96	1.72
AC006129.2	C10orf131,ENTPD1-AS1	C10orf131,ENTPD1-AS1	C10orf131-001,C10orf131-002,ENTPD1-AS1-005,ENTPD1-AS1-006,ENTPD1-AS1-007,ENTPD1-AS1-008	10	97667398	97667523	84.86	0.022	0.011	0.023	0.011	2	rs10882685,rs115524816	0.23	0.18	0.17	-0.25	0.15	0.89
AC006129.2	C10orf131,ENTPD1-AS1	C10orf131,ENTPD1-AS1	C10orf131-001,C10orf131-002,ENTPD1-AS1-005,ENTPD1-AS1-006,ENTPD1-AS1-007,ENTPD1-AS1-008	10	97667302	97667495	135.24	0.022	0.011	0.023	0.011	2	rs10882685,rs35228177	0.22	0.19	0.17	-0.28	0.15	-0.38
AC006129.2	C10orf2,MRPL43,RP11-108L7.4	TWNK,MRPL43,RP11-108L7.4	C10orf2-001,C10orf2-002,C10orf2-003,C10orf2-004,C10orf2-005,MRPL43-001,MRPL43-002,MRPL43-003,MRPL43-004,MRPL43-005,MRPL43-006,MRPL43-007,MRPL43-008,MRPL43-009,MRPL43-010,MRPL43-011,MRPL43-012,MRPL43-013,MRPL43-201,RP11-108L7.4-001	10	102747559	102747676	80.32	0.016	0	0.009	0	1	rs118036649	0	#-nan	0	-0.97	#-nan	#-nan
AC006129.2	C10orf35	FAM241B	C10orf35-001,C10orf35-002,C10orf35-003	10	71389731	71389864	94.57	0.008	0	0	0						#-nan	#-nan	#-nan
AC006129.2	C10orf53	C10orf53	C10orf53-001,C10orf53-002,C10orf53-003,C10orf53-201	10	50887622	50887706	60.91	0.06	0.013	0.013	0.013	1	rs1153781	0.16	0.03	0.13	#-nan	1.32	0.59
AC006129.2	C10orf54	VSIR	C10orf54-001	10	73536469	73536567	69.44	0	0	0.01	0						#-nan	#-nan	#-nan
AC006129.2	C10orf54	VSIR	C10orf54-002	10	73524769	73524895	87.35	0.008	0	0	0						#-nan	#-nan	#-nan
AC006129.2	C10orf67,RP11-371A19.2	C10orf67,C10orf67-AS1	C10orf67-001,C10orf67-002,RP11-371A19.2-001	10	23633186	23633277	64.75	0	0	0.012	0						#-nan	#-nan	#-nan
AC006129.2	C10orf67,RP11-371A19.2	C10orf67,C10orf67-AS1	C10orf67-001,C10orf67-002,RP11-371A19.2-001	10	23633183	23633276	66.46	0	0	0.012	0						#-nan	#-nan	#-nan
AC006129.2	C10orf76	ARMH3	C10orf76-001,C10orf76-004	10	103818129	103818214	60.49	0.013	0	0.012	0						#-nan	#-nan	#-nan
AC006129.2	C10orf76	ARMH3	C10orf76-005	10	103795932	103796037	77.09	0.031	0	0.01	0	1	.	0.12	0.1	0.06	0.97	0.81	-0.57
AC006129.2	C10orf88,PSTK	C10orf88,PSTK	C10orf88-001,C10orf88-002,C10orf88-003,PSTK-006	10	124713559	124713644	60.49	0.012	0	0.012	0	1	rs142159431	0.02	0.02	0.02	#-nan	#-nan	-0.77
AC006129.2	C10orf91,RP11-432J24.3	LINC02870,LINC03068	C10orf91-001,C10orf91-002,C10orf91-201,RP11-432J24.3-001	10	134257545	134257777	162.54	0.172	0.056	0.038	0.018	3	.,.,.	0.04	0.08	0.05	-1.21	-1.21	-0.58
AC006129.2	C10orf95,RP11-18I14.10	C10orf95,RP11-18I14.10	C10orf95-002,RP11-18I14.10-001,RP11-18I14.10-002,RP11-18I14.10-003,RP11-18I14.10-004,RP11-18I14.10-005,RP11-18I14.10-006,RP11-18I14.10-007,RP11-18I14.10-008	10	104210208	104210296	62.64	0.013	0	0	0						#-nan	#-nan	#-nan
AC006129.2	C1QL3	C1QL3	C1QL3-001,C1QL3-201(*)	10	16563689	16563804	80.94	0	0	0.009	0	1	rs189357616	0.02	0.02	0.02	#-nan	#-nan	-0.77
AC006129.2	CACNB2	CACNB2	CACNB2-001,CACNB2-002,CACNB2-008,CACNB2-009,CACNB2-010,CACNB2-011,CACNB2-012	10	18429496	18429602	76.46	0.017	0	0.012	0						#-nan	#-nan	#-nan
AC006129.2	CACNB2	CACNB2	CACNB2-001,CACNB2-002,CACNB2-008,CACNB2-009,CACNB2-010,CACNB2-011,CACNB2-012	10	18429760	18429939	126.95	0.017	0	0.012	0	2	rs185370055,.	0	0.01	0.01	#-nan	-0.77	-0.97
AC006129.2	CACNB2	CACNB2	CACNB2-006,CACNB2-007,CACNB2-201(*),CACNB2-202(*)	10	18627561	18627656	67.31	0.103	0	0.092	0	4	.,rs148651095,.,rs145604405	0.21	0.31	0.2	1.44	2.86	1.4
AC006129.2	CACUL1	CACUL1	CACUL1-001,CACUL1-002,CACUL1-004,CACUL1-201	10	120514046	120514139	66.53	0	0	0.011	0						#-nan	#-nan	#-nan
AC006129.2	CALHM3	CALHM3	CALHM3-001	10	105241904	105242028	83.21	0.008	0	0.017	0						#-nan	#-nan	#-nan
AC006129.2	CALML3,CALML3-AS1,RP11-116G8.5	CALML3,CALML3-AS1,RP11-116G8.5	CALML3-001,CALML3-AS1-001,CALML3-AS1-002,CALML3-AS1-003,RP11-116G8.5-001	10	5567594	5567712	81.56	0.048	0.009	0.009	0.009	1	rs4242797	0.18	0.33	0.24	-0.25	#-nan	1.58
AC006129.2	CALY	CALY	CALY-001,CALY-004,CALY-005,CALY-201	10	135150575	135150840	184.8	0.009	0	0.012	0	3	.,rs77939361,rs35297981	0.37	0.52	0.42	-0.57	#-nan	1.06
AC006129.2	CALY	CALY	CALY-001,CALY-004,CALY-005,CALY-201	10	135149325	135149444	80.78	0.009	0	0.012	0	1	rs115551369	0.03	0.03	0.03	#-nan	#-nan	-0.64
AC006129.2	CALY,RP11-122K13.14	CALY,RP11-122K13.14	CALY-002,CALY-003,RP11-122K13.14-001	10	135139295	135139484	138.41	0.071	0.021	0.021	0	1	rs140691452	0.1	0.08	0.08	#-nan	-0.9	0.08
AC006129.2	CAMK1D	CAMK1D	CAMK1D-001,CAMK1D-002,CAMK1D-003	10	12391684	12391804	85.63	0	0	0.014	0						#-nan	#-nan	#-nan
AC006129.2	CAMK1D	CAMK1D	CAMK1D-001,CAMK1D-002,CAMK1D-003	10	12392085	12392237	106.26	0	0	0.014	0	1	rs142549311	0.02	0	0.01	-0.76	-0.96	#-nan
AC006129.2	CAMK2G	CAMK2G	CAMK2G-001,CAMK2G-002,CAMK2G-004,CAMK2G-005,CAMK2G-006,CAMK2G-201,CAMK2G-202,CAMK2G-203,CAMK2G-204	10	75634401	75634505	74.74	0.044	0.021	0	0						#-nan	#-nan	#-nan
AC006129.2	CAMK2G	CAMK2G	CAMK2G-001,CAMK2G-002,CAMK2G-004,CAMK2G-005,CAMK2G-006,CAMK2G-201,CAMK2G-202,CAMK2G-203,CAMK2G-204	10	75634000	75634105	77.26	0.044	0.021	0	0						#-nan	#-nan	#-nan
AC006129.2	CAMK2G	CAMK2G	CAMK2G-001,CAMK2G-002,CAMK2G-004,CAMK2G-005,CAMK2G-006,CAMK2G-201,CAMK2G-202,CAMK2G-203,CAMK2G-204	10	75632955	75633068	76.7	0.044	0.021	0	0	1	rs77833482	#-nan	0	0	#-nan	-0.96	#-nan
AC006129.2	CAMK2G	CAMK2G	CAMK2G-007	10	75579413	75579507	65.1	0	0	0.023	0						#-nan	#-nan	#-nan
AC006129.2	CAMK2G	CAMK2G	CAMK2G-009	10	75615238	75615326	60.03	0.012	0	0.012	0						#-nan	#-nan	#-nan
AC006129.2	CAMK2G,RP11-574K11.8	CAMK2G,RP11-574K11.8	CAMK2G-012,RP11-574K11.8-001	10	75600724	75600812	61.77	0	0	0	0						#-nan	#-nan	#-nan
AC006129.2	CASC10	MIR1915HG	CASC10-001	10	21785462	21785562	73.26	0	0	0	0						#-nan	#-nan	#-nan
AC006129.2	CASC10,MIR1915	MIR1915HG,MIR1915	CASC10-001,MIR1915-201(*)	10	21785464	21785568	76.81	0	0	0	0						#-nan	#-nan	#-nan
AC006129.2	CASC2,RAB11FIP2	CASC2,RAB11FIP2	CASC2-001,CASC2-002,CASC2-003,CASC2-004,CASC2-005,CASC2-006,RAB11FIP2-001,RAB11FIP2-201	10	119806237	119806337	71.28	0.034	0.01	0.01	0.01	1	rs2928113	0.01	0.22	0.11	0.47	-0.96	1.06
AC006129.2	CASC2,RAB11FIP2	CASC2,RAB11FIP2	CASC2-001,CASC2-002,CASC2-003,CASC2-004,CASC2-005,CASC2-006,RAB11FIP2-001,RAB11FIP2-201	10	119806236	119806333	69.12	0.034	0.01	0.01	0.01	1	rs2928113	0.01	0.22	0.11	0.47	-0.96	1.06
AC006129.2	CASP7	CASP7	CASP7-001,CASP7-002,CASP7-003,CASP7-004,CASP7-005,CASP7-201,CASP7-203(*),CASP7-204(*)	10	115439736	115439834	69.44	0.04	0	0.011	0						#-nan	#-nan	#-nan
AC006129.2	CCAR1	CCAR1	CCAR1-001,CCAR1-003,CCAR1-009,CCAR1-010,CCAR1-011,CCAR1-012,CCAR1-013,CCAR1-014,CCAR1-015,CCAR1-017,CCAR1-018,CCAR1-201	10	70481181	70481343	114.59	0.013	0.006	0.013	0.006	2	rs2275935,rs138269834	0.17	0.04	0.1	0.66	-0.89	#-nan
AC006129.2	CCAR1	CCAR1	CCAR1-019	10	70531077	70531173	64.87	0.011	0	0	0						#-nan	#-nan	#-nan
AC006129.2	CCDC147,CCDC147-AS1	CCDC147,CFAP58-DT	CCDC147-001,CCDC147-201,CCDC147-AS1-001	10	106114899	106115000	67.54	0	0	0.01	0.01	1	rs74566771	0.04	0.04	0.04	#-nan	#-nan	-0.51
AC006129.2	CCDC3,OPTN	CCDC3,OPTN	CCDC3-001,OPTN-002,OPTN-004,OPTN-005,OPTN-006,OPTN-007,OPTN-008,OPTN-009,OPTN-010,OPTN-011	10	13141324	13141433	77.53	0.311	0	0.009	0						#-nan	#-nan	#-nan
AC006129.2	CCDC3	CCDC3	CCDC3-002	10	13043387	13043622	171.7	0	0	0.004	0						#-nan	#-nan	#-nan
AC006129.2	CCDC6	CCDC6	CCDC6-001	10	61665825	61665919	65.94	0	0	0.011	0	1	rs1171830	0.47	0.55	0.35	1.94	1.89	-0.97
AC006129.2	CCNY,RP11-324I22.4	CCNY,CCNY-AS1	CCNY-002,CCNY-003,CCNY-201,CCNY-202,RP11-324I22.4-001	10	35625758	35625893	98.99	0.012	0.011	0.011	0.011						#-nan	#-nan	#-nan
AC006129.2	CCNY,RP11-324I22.4	CCNY,CCNY-AS1	CCNY-002,CCNY-003,CCNY-201,CCNY-202,RP11-324I22.4-001	10	35625790	35625883	67.45	0.012	0.011	0.011	0.011						#-nan	#-nan	#-nan
AC006129.2	CCNY	CCNY	CCNY-008	10	35720260	35720372	80.78	0.288	0.061	0.009	0	1	.	0.04	0.11	0.07	-0.7	#-nan	0.14
AC006129.2	CCSER2	CCSER2	CCSER2-001,CCSER2-002,CCSER2-201	10	86088523	86088631	79.28	0	0	0	0						#-nan	#-nan	#-nan
AC006129.2	CDC123,RP11-186N15.3	CDC123,RP11-186N15.3	CDC123-005,RP11-186N15.3-001,RP11-186N15.3-002	10	12288948	12289257	218.96	0.057	0.017	0.021	0	5	.,rs148536096,rs12254368,rs115250888,rs182312935	0.11	0.04	0.06	2.05	1.6	0.75
AC006129.2	CDH23	CDH23	CDH23-002,CDH23-003,CDH23-202,CDH23-203,CDH23-001(*),CDH23-009(*),CDH23-205(*)	10	73156522	73156633	77	0.009	0	0.009	0	1	rs112900355	0	0	0	0.04	0.25	-0.03
AC006129.2	CDH23	CDH23	CDH23-006	10	73405219	73405345	87.78	0.008	0.021	0.021	0	3	rs115281855,rs141890766,rs75387018	0.12	0.12	0.12	#-nan	-0.96	-0.29
AC006129.2	CDH23	CDH23	CDH23-008,CDH23-201,CDH23-204(*)	10	73553412	73553502	63.47	0	0.021	0.021	0	1	rs189615427	0.01	0.01	0.01	#-nan	#-nan	-0.9
AC006129.2	CDHR1	CDHR1	CDHR1-001,CDHR1-002	10	85954339	85954472	95.04	0.008	0	0.008	0	1	rs183065817	0	0	0	#-nan	#-nan	-0.97
AC006129.2	CDK1	CDK1	CDK1-007,CDK1-008,CDK1-009,CDK1-010,CDK1-013,CDK1-014,CDK1-201	10	62538459	62538576	83.5	0.018	0.021	0.021	0	1	rs141276080	#-nan	0	0	#-nan	-0.96	#-nan
AC006129.2	CDK1	CDK1	CDK1-007,CDK1-008,CDK1-009,CDK1-010,CDK1-013,CDK1-014,CDK1-201,CDK1-202(*)	10	62538454	62538575	86.05	0.018	0.021	0.021	0	1	rs141276080	#-nan	0	0	#-nan	-0.96	#-nan
AC006129.2	CDNF,HSPA14	CDNF,HSPA14	CDNF-004,HSPA14-001,HSPA14-003,HSPA14-004,HSPA14-005,HSPA14-006	10	14877367	14877455	62.64	0.026	0.021	0.021	0						#-nan	#-nan	#-nan
AC006129.2	CELF2	CELF2	CELF2-001,CELF2-002,CELF2-003,CELF2-004,CELF2-005,CELF2-006,CELF2-205,CELF2-207	10	11207618	11207715	66.1	0.023	0.021	0.021	0						#-nan	#-nan	#-nan
AC006129.2	CELF2	CELF2	CELF2-202,CELF2-204,CELF2-206,CELF2-208	10	11060290	11060420	93.74	0.016	0	0	0						#-nan	#-nan	#-nan
AC006129.2	CH17-360D5.2	CH17-360D5.2	CH17-360D5.2-001(*),CH17-360D5.2-002(*)	10	49200400	49200493	65.6	0	0	0	0						#-nan	#-nan	#-nan
AC006129.2	CHAT	CHAT	CHAT-001,CHAT-002,CHAT-003,CHAT-004,CHAT-006,CHAT-201,CHAT-202,CHAT-203,CHAT-204	10	50821620	50821732	76.59	0.009	0	0	0						#-nan	#-nan	#-nan
AC006129.2	CHAT,SLC18A3	CHAT,SLC18A3	CHAT-004,CHAT-006,CHAT-007,CHAT-201,CHAT-202,SLC18A3-001	10	50818313	50818402	62.16	0.009	0	0	0						#-nan	#-nan	#-nan
AC006129.2	CHST15	CHST15	CHST15-001,CHST15-002,CHST15-201	10	125852781	125852902	86.4	0	0	0.009	0	1	rs181078632	0.03	0.18	0.21	-0.97	1.49	-0.45
AC006129.2	CISD1,IPMK	CISD1,IPMK	CISD1-001,CISD1-003,IPMK-001	10	60027300	60027435	96.28	0.007	0	0.016	0	1	rs181154460	0	#-nan	0	-0.97	#-nan	#-nan
AC006129.2	CISD1,IPMK	CISD1,IPMK	CISD1-001,CISD1-003,IPMK-001	10	60027297	60027435	97.55	0.007	0	0.016	0	1	rs181154460	0	#-nan	0	-0.97	#-nan	#-nan
AC006129.2	CNNM1	CNNM1	CNNM1-001,CNNM1-201,CNNM1-202,CNNM1-203	10	101089741	101089859	85.1	0.009	0.021	0.021	0	2	rs112168939,rs74419794	0.02	0	0.02	-0.7	-0.9	#-nan
AC006129.2	CNNM1	CNNM1	CNNM1-002	10	101125274	101125367	64.58	0.024	0	0.011	0						#-nan	#-nan	#-nan
AC006129.2	CNNM2	CNNM2	CNNM2-003	10	104825929	104826052	84.05	0.062	0	0.017	0	2	rs117016818,rs146699413	0.01	0.02	0.02	#-nan	-0.65	-0.9
AC006129.2	COL13A1	COL13A1	COL13A1-007	10	71637345	71637478	91.08	0.011	0.021	0.021	0	1	rs59784014	0	0.13	0.09	-0.07	1.23	-0.38
AC006129.2	COL13A1	COL13A1	COL13A1-008	10	71689959	71690044	62.2	0.013	0	0.012	0						#-nan	#-nan	#-nan
AC006129.2	COL17A1	COL17A1	COL17A1-002	10	105795567	105795697	89.84	0.056	0.044	0.016	0.016						#-nan	#-nan	#-nan
AC006129.2	COL17A1	COL17A1	COL17A1-004	10	105839092	105839192	69.14	0.022	0	0.021	0						#-nan	#-nan	#-nan
AC006129.2	COL17A1	COL17A1	COL17A1-005	10	105827638	105827751	77.83	0.019	0.009	0.028	0	3	rs118121877,rs117340884,rs115068527	0.02	0.02	0.02	-1.03	#-nan	-0.77
AC006129.2	COL17A1	COL17A1	COL17A1-006	10	105816847	105816936	63.94	0.024	0.011	0.064	0.011	4	rs805698,rs200949191,rs61731082,rs805697	0.54	0.45	0.45	-1.21	-0.78	0.03
AC006129.2	COMMD3,COMMD3-BMI1	COMMD3,COMMD3-BMI1	COMMD3-001,COMMD3-002,COMMD3-003,COMMD3-004,COMMD3-006,COMMD3-009,COMMD3-010,COMMD3-011,COMMD3-012,COMMD3-013,COMMD3-014,COMMD3-015,COMMD3-016,COMMD3-017,COMMD3-018,COMMD3-BMI1-002,COMMD3-BMI1-003,COMMD3-BMI1-004,COMMD3-BMI1-005,COMMD3-BMI1-006	10	22605174	22605287	80.09	0.02	0	0.016	0						#-nan	#-nan	#-nan
AC006129.2	COMMD3,COMMD3-BMI1	COMMD3,COMMD3-BMI1	COMMD3-001,COMMD3-002,COMMD3-003,COMMD3-004,COMMD3-006,COMMD3-009,COMMD3-010,COMMD3-011,COMMD3-012,COMMD3-013,COMMD3-014,COMMD3-015,COMMD3-016,COMMD3-017,COMMD3-018,COMMD3-BMI1-002,COMMD3-BMI1-003,COMMD3-BMI1-004,COMMD3-BMI1-005,COMMD3-BMI1-006	10	22605179	22605288	77.53	0.02	0	0.016	0						#-nan	#-nan	#-nan
AC006129.2	COMMD3,COMMD3-BMI1	COMMD3,COMMD3-BMI1	COMMD3-001,COMMD3-002,COMMD3-003,COMMD3-004,COMMD3-006,COMMD3-009,COMMD3-010,COMMD3-011,COMMD3-012,COMMD3-013,COMMD3-014,COMMD3-015,COMMD3-016,COMMD3-017,COMMD3-018,COMMD3-BMI1-002,COMMD3-BMI1-003,COMMD3-BMI1-004,COMMD3-BMI1-005,COMMD3-BMI1-006	10	22605152	22605282	91.59	0.02	0	0.016	0	2	rs11012944,rs183092168	0.2	0.22	0.2	-0.9	#-nan	1.08
AC006129.2	COMTD1	COMTD1	COMTD1-001,COMTD1-002,COMTD1-003,COMTD1-004,COMTD1-005,COMTD1-006,COMTD1-007	10	76995634	76995722	62.64	0.029	0	0	0						#-nan	#-nan	#-nan
AC006129.2	COMTD1	COMTD1	COMTD1-005,COMTD1-006,COMTD1-007(*)	10	76994141	76994255	80.51	0.029	0	0	0						#-nan	#-nan	#-nan
AC006129.2	COX15,CUTC	COX15,CUTC	COX15-001,COX15-002,CUTC-001,CUTC-003,CUTC-004	10	101492165	101492271	73.5	0.01	0.021	0.021	0	2	rs2231675,rs146103692	0.01	0	0.02	1.86	1.89	0.66
AC006129.2	CPEB3,MARCHF5	CPEB3,MARCHF5	CPEB3-002,MARCHF5-001	10	94050987	94051071	60.05	0.013	0.021	0.021	0	2	rs746842,rs115311029	0.23	0.12	0.13	1.45	0.73	-0.7
AC006129.2	CPN1	CPN1	CPN1-001	10	101840611	101840708	67.07	0.036	0	0.01	0						#-nan	#-nan	#-nan
AC006129.2	CPXM2	CPXM2	CPXM2-002,CPXM2-201(*)	10	125651338	125651430	63.34	0.011	0	0.011	0						#-nan	#-nan	#-nan
AC006129.2	CREM,RP11-297A16.2	CREM,RP11-297A16.2	CREM-001,CREM-002,CREM-016,CREM-017,CREM-018,CREM-023,CREM-032,CREM-036,CREM-038,CREM-039,CREM-040,CREM-041,CREM-042,CREM-043,CREM-044,CREM-045,CREM-046,CREM-047,CREM-048,CREM-049,CREM-202,CREM-203,RP11-297A16.2-001,RP11-297A16.2-003,RP11-297A16.2-004	10	35415689	35415863	125.71	0	0	0.01	0	1	rs73260847	0.15	0.16	0.15	#-nan	#-nan	0.54
AC006129.2	CREM,RP11-297A16.2	CREM,RP11-297A16.2	CREM-001,CREM-002,CREM-016,CREM-017,CREM-018,CREM-023,CREM-032,CREM-036,CREM-038,CREM-039,CREM-040,CREM-041,CREM-042,CREM-043,CREM-044,CREM-045,CREM-046,CREM-047,CREM-048,CREM-049,CREM-202,CREM-203,RP11-297A16.2-001,RP11-297A16.2-003,RP11-297A16.2-004	10	35415657	35415871	152.08	0	0	0.01	0	2	rs114731270,rs73260847	0.15	0.16	0.15	#-nan	#-nan	0.73
AC006129.2	CRTAC1	CRTAC1	CRTAC1-001,CRTAC1-201,CRTAC1-202	10	99789166	99789264	67.48	0.129	0	0.01	0	1	rs484357	0	0.01	0	-0.07	-0.54	-0.09
AC006129.2	CRTAC1	CRTAC1	CRTAC1-002	10	99699344	99699461	85.85	0.018	0	0.028	0	3	rs73332571,rs574293,rs117305686	0.02	0.02	0.02	1.01	0.34	0.75
AC006129.2	CSGALNACT2,RP11-351D16.3	CSGALNACT2,CSGALNACT2-DT	CSGALNACT2-001,CSGALNACT2-201,RP11-351D16.3-001	10	43633866	43633973	79.03	0.01	0	0.01	0	1	rs148684525	0.01	0.02	0.02	-0.44	#-nan	-0.77
AC006129.2	CTBP2	CTBP2	CTBP2-001,CTBP2-002,CTBP2-003,CTBP2-004,CTBP2-008,CTBP2-010,CTBP2-011,CTBP2-014	10	126848953	126849050	69.98	0	0	0.051	0	2	.,.	0	0	0	#-nan	#-nan	-0.9
AC006129.2	CTBP2	CTBP2	CTBP2-001,CTBP2-002,CTBP2-003,CTBP2-004,CTBP2-008,CTBP2-010,CTBP2-011,CTBP2-014	10	126848328	126848490	116.21	0	0	0.051	0						#-nan	#-nan	#-nan
AC006129.2	CTBP2	CTBP2	CTBP2-005,CTBP2-012,CTBP2-015	10	126694089	126694204	84.1	0.07	0	0.038	0	1	rs41303611	0.01	#-nan	0.01	-0.9	#-nan	#-nan
AC006129.2	CUBN	CUBN	CUBN-004	10	17169171	17169259	60.9	0.192	0	0.026	0	7	.,rs10550610,.,rs570693283,.,rs10550609,rs150337829	0.03	0.07	0.04	-1.24	-1.84	-0.58
AC006129.2	CUL2	CUL2	CUL2-001,CUL2-002,CUL2-006,CUL2-007,CUL2-008,CUL2-201,CUL2-203	10	35379299	35379423	88.56	0.013	0	0.008	0						#-nan	#-nan	#-nan
AC006129.2	CUZD1	CUZD1	CUZD1-002,CUZD1-003,CUZD1-004,CUZD1-201	10	124607721	124607809	60.9	0.038	0	0.012	0						#-nan	#-nan	#-nan
AC006129.2	CUZD1,FAM24B	CUZD1,FAM24B	CUZD1-202,FAM24B-001,FAM24B-002,FAM24B-003,FAM24B-004	10	124638944	124639047	74.3	0.02	0	0.029	0	1	rs36212727	0.02	0	0.01	#-nan	-0.77	-0.7
AC006129.2	CXCL12	CXCL12	CXCL12-001,CXCL12-002,CXCL12-003,CXCL12-004,CXCL12-005,CXCL12-006,CXCL12-007,CXCL12-201	10	44880584	44880708	90.67	0	0	0.017	0						#-nan	#-nan	#-nan
AC006129.2	CYP2C8	CYP2C8	CYP2C8-011	10	96801522	96801612	64.33	0.051	0.025	0.025	0						#-nan	#-nan	#-nan
AC006129.2	CYP2E1	CYP2E1	CYP2E1-001	10	135334995	135335101	72.45	0.044	0	0.01	0	1	rs74162036	0.05	0.05	0.05	#-nan	#-nan	#-nan
AC006129.2	CYP2E1	CYP2E1	CYP2E1-002,CYP2E1-003,CYP2E1-006,CYP2E1-007,CYP2E1-008,CYP2E1-010,CYP2E1-201	10	135338700	135338812	77.42	0.148	0	0.019	0	1	rs189044342	0.01	0.01	0.01	#-nan	#-nan	-0.97
AC006129.2	CYP2E1	CYP2E1	CYP2E1-005	10	135350296	135350385	63.94	0.128	0	0.072	0	5	rs12762259,rs71505853,rs142558673,rs143586548,rs148034416	0.36	0.28	0.25	#-nan	#-nan	#-nan
AC006129.2	DCLRE1A,NHLRC2	DCLRE1A,NHLRC2	DCLRE1A-001,DCLRE1A-002,DCLRE1A-003,NHLRC2-001,NHLRC2-002	10	115615172	115615265	64.68	0.039	0	0	0						#-nan	#-nan	#-nan
AC006129.2	DHTKD1	DHTKD1	DHTKD1-001,DHTKD1-006	10	12110022	12110124	70.98	0.064	0	0.033	0	1	rs138212579	0.06	0.12	0.06	0.26	0.85	-0.7
AC006129.2	DHX32	DHX32	DHX32-002	10	127545865	127545952	60.48	0	0	0	0						#-nan	#-nan	#-nan
AC006129.2	DHX32,FANK1	DHX32,FANK1	DHX32-003,FANK1-001,FANK1-201,FANK1-202	10	127584671	127584777	76.65	0	0.047	0.088	0	1	.	0.05	0	0.04	1.12	0.05	0.19
AC006129.2	DIP2C	DIP2C	DIP2C-001,DIP2C-002	10	735682	735865	130.36	0.018	0.018	0	0.012						#-nan	#-nan	#-nan
AC006129.2	DIP2C	DIP2C	DIP2C-001,DIP2C-002	10	735066	735184	81.56	0.018	0.018	0	0.012						#-nan	#-nan	#-nan
AC006129.2	DIP2C	DIP2C	DIP2C-003	10	433432	433590	107.3	0	0.072	0.053	0.006	2	rs148848077,rs183659414	0.01	0	0	-1.12	-0.83	-0.77
AC006129.2	DIP2C	DIP2C	DIP2C-201(*)	10	533457	533551	66.96	0	0	0	0						#-nan	#-nan	#-nan
AC006129.2	DLG5,DLG5-AS1	DLG5,DLG5-AS1	DLG5-001,DLG5-201,DLG5-AS1-001	10	79686428	79686607	126.95	0	0.021	0.021	0	1	rs190519129	0.24	0.26	0.25	#-nan	#-nan	1.2
AC006129.2	DLG5	DLG5	DLG5-002	10	79648787	79648881	65	0.011	0	0	0						#-nan	#-nan	#-nan
AC006129.2	DLG5	DLG5	DLG5-007,DLG5-008	10	79570882	79571012	92.88	0	0.021	0.021	0						#-nan	#-nan	#-nan
AC006129.2	DMBT1	DMBT1	DMBT1-001,DMBT1-002,DMBT1-003,DMBT1-201,DMBT1-202,DMBT1-203,DMBT1-204,DMBT1-205(*)	10	124321109	124321262	112.13	0.013	0.021	0.021	0	5	rs77064433,rs114191030,rs11517386,rs57507598,rs71881705	0.09	0.09	0.09	1.36	0.99	0.05
AC006129.2	DNAJB12	DNAJB12	DNAJB12-001,DNAJB12-003,DNAJB12-201,DNAJB12-202	10	74114304	74114405	71.57	0	0	0.01	0	1	rs76463088	0.02	0.03	0.02	#-nan	#-nan	-0.7
AC006129.2	DNAJC1	DNAJC1	DNAJC1-001,DNAJC1-003,DNAJC1-004,DNAJC1-005	10	22292204	22292288	61.76	0	0	0	0						#-nan	#-nan	#-nan
AC006129.2	DNAJC1	DNAJC1	DNAJC1-002	10	22152066	22152183	82.32	0.009	0	0	0						#-nan	#-nan	#-nan
AC006129.2	DNAJC9,DNAJC9-AS1	DNAJC9,DNAJC9-AS1	DNAJC9-002,DNAJC9-AS1-001,DNAJC9-AS1-002	10	75006630	75006715	60.48	0	0	0.012	0						#-nan	#-nan	#-nan
AC006129.2	DNMBP	DNMBP	DNMBP-001,DNMBP-201	10	101769524	101769680	112.75	0.027	0.011	0.088	0	1	rs146141430	0.05	0	0.04	-0.44	-0.96	#-nan
AC006129.2	DNMBP	DNMBP	DNMBP-002,DNMBP-201(*)	10	101674875	101674970	64.46	0.027	0.011	0.088	0	5	rs202144781,rs7894475,rs183993112,rs7894369,.	0.09	0.11	0.09	1.07	0.15	1.44
AC006129.2	DNMBP	DNMBP	DNMBP-003	10	101650921	101651013	65.18	10	0	0	0						#-nan	#-nan	#-nan
AC006129.2	DPCD	DPCD	DPCD-003,DPCD-202	10	103327477	103327585	76.02	0	0	0.01	0	1	rs118178837	#-nan	0	0	#-nan	-0.96	#-nan
AC006129.2	DPCD,MIR3158-2	DPCD,MIR3158-1	DPCD-005,MIR3158-2-201	10	103360606	103360715	78.62	0.019	0	0.013	0						#-nan	#-nan	#-nan
AC006129.2	DPYSL4,RP11-140A10.3	DPYSL4,JAKMIP3-AS1	DPYSL4-001,DPYSL4-002,DPYSL4-003,DPYSL4-201,RP11-140A10.3-001,RP11-140A10.3-002	10	133999764	133999859	67.31	0.11	0.011	0.051	0.011	2	rs902631,rs190755492	0	0.11	0.06	0.62	-0.84	0.94
AC006129.2	DPYSL4	DPYSL4	DPYSL4-005	10	134013762	134013865	69.36	0	0	0.034	0	2	rs871883,rs114445641	0.41	0.62	0.41	1.94	1.46	-0.86
AC006129.2	DRGX	DRGX	DRGX-001,DRGX-201	10	50603249	50603355	71.4	0.021	0	0.01	0						#-nan	#-nan	#-nan
AC006129.2	DUSP13,SAMD8	DUSP13B,SAMD8	DUSP13-001,DUSP13-003,DUSP13-005,DUSP13-006,DUSP13-008,DUSP13-010,DUSP13-011,DUSP13-012,DUSP13-013,DUSP13-201,DUSP13-202,SAMD8-001,SAMD8-002,SAMD8-201	10	76871299	76871398	71.71	0.021	0.01	0.01	0.01						#-nan	#-nan	#-nan
AC006129.2	DUSP13,SAMD8	DUSP13B,SAMD8	DUSP13-002,DUSP13-004,DUSP13-007,DUSP13-009,SAMD8-003	10	76858023	76858120	68.16	0	0.021	0.021	0	1	rs79539929	0.06	0.07	0.07	#-nan	#-nan	-0.26
AC006129.2	DUSP5,RP11-525A16.4	DUSP5,DUSP5-DT	DUSP5-001,RP11-525A16.4-001,RP11-525A16.4-002	10	112258726	112258868	98.12	0.008	0	0.008	0						#-nan	#-nan	#-nan
AC006129.2	DUSP5,RP11-525A16.4	DUSP5,DUSP5-DT	DUSP5-001,RP11-525A16.4-001,RP11-525A16.4-002	10	112258730	112258860	92.44	0.008	0	0.008	0						#-nan	#-nan	#-nan
AC006129.2	DYDC1,DYDC2	DYDC1,DYDC2	DYDC1-001,DYDC1-002,DYDC1-003,DYDC1-004,DYDC1-201,DYDC2-003,DYDC2-004,DYDC2-201	10	82116628	82116727	68.88	0.036	0.011	0.023	0.011						#-nan	#-nan	#-nan
AC006129.2	DYDC1,DYDC2	DYDC1,DYDC2	DYDC1-001,DYDC1-002,DYDC1-003,DYDC1-004,DYDC1-201,DYDC2-003,DYDC2-004,DYDC2-201	10	82116615	82116796	127.8	0.036	0.011	0.023	0.011						#-nan	#-nan	#-nan
AC006129.2	DYDC1,DYDC2	DYDC1,DYDC2	DYDC1-001,DYDC1-002,DYDC1-003,DYDC1-004,DYDC1-201,DYDC2-003,DYDC2-004,DYDC2-201,DYDC2-202(*)	10	82116926	82117019	67.39	0.036	0.011	0.023	0.011	2	rs4934084,rs115095305	0.26	0.16	0.26	#-nan	#-nan	0.77
AC006129.2	ECD,FAM149B1	ECD,FAM149B1	ECD-001,ECD-002,ECD-003,ECD-004,ECD-006,ECD-007,ECD-008,FAM149B1-001	10	74927965	74928068	74.46	0.009	0	0.01	0						#-nan	#-nan	#-nan
AC006129.2	ECD,FAM149B1	ECD,FAM149B1	ECD-001,ECD-002,ECD-003,ECD-004,ECD-006,ECD-007,ECD-008,FAM149B1-001	10	74927665	74927775	77.96	0.009	0	0.01	0						#-nan	#-nan	#-nan
AC006129.2	ECHDC3	ECHDC3	ECHDC3-001,ECHDC3-002,ECHDC3-004	10	11784284	11784375	61.1	0.055	0.012	0.012	0	1	.	0	0	0	-0.7	-0.54	-0.7
AC006129.2	ECHS1,MIR3944	ECHS1,MIR3944	ECHS1-001,MIR3944-201	10	135186328	135186543	152.51	0.018	0.005	0.005	0	1	rs192155878	0.03	#-nan	0.03	-0.63	#-nan	#-nan
AC006129.2	EDRF1	EDRF1	EDRF1-001,EDRF1-003,EDRF1-006,EDRF1-007,EDRF1-008,EDRF1-009	10	127405549	127405642	60.98	0	0	0	0						#-nan	#-nan	#-nan
AC006129.2	EDRF1	EDRF1	EDRF1-001,EDRF1-003,EDRF1-006,EDRF1-007,EDRF1-008,EDRF1-009	10	127405554	127405670	76.43	0	0	0	0						#-nan	#-nan	#-nan
AC006129.2	EGR2	EGR2	EGR2-001,EGR2-201,EGR2-202	10	64578574	64578711	99.86	0.112	0	0.024	0						#-nan	#-nan	#-nan
AC006129.2	EIF4EBP2	EIF4EBP2	EIF4EBP2-001	10	72163913	72164026	78.96	0.009	0	0	0						#-nan	#-nan	#-nan
AC006129.2	EMX2,EMX2OS	EMX2,EMX2OS	EMX2-001,EMX2-003,EMX2-004,EMX2OS-001,EMX2OS-002	10	119301814	119301916	72.85	0.01	0	0	0						#-nan	#-nan	#-nan
AC006129.2	EMX2,EMX2OS	EMX2,EMX2OS	EMX2-001,EMX2-003,EMX2-004,EMX2OS-001,EMX2OS-002	10	119301814	119301917	73.27	0.01	0	0	0						#-nan	#-nan	#-nan
AC006129.2	EMX2,EMX2OS	EMX2,EMX2OS	EMX2-001,EMX2-003,EMX2-004,EMX2OS-001,EMX2OS-002,EMX2-002(*)	10	119301812	119301912	70.29	0.01	0	0	0						#-nan	#-nan	#-nan
AC006129.2	ENKUR,THNSL1	ENKUR,THNSL1	ENKUR-001,ENKUR-002,ENKUR-003,ENKUR-004,THNSL1-001,THNSL1-002	10	25305438	25305594	111.89	0.021	0.021	0.038	0.007	6	rs7095364,rs41279886,rs41279888,rs113010165,.,rs116453055	0.04	0.24	0.14	0.05	1.95	-0.26
AC006129.2	ENKUR,THNSL1	ENKUR,THNSL1	ENKUR-001,ENKUR-002,ENKUR-003,ENKUR-004,THNSL1-001,THNSL1-002	10	25305423	25305586	115.02	0.021	0.021	0.038	0.007	6	rs7095364,rs41279886,rs41279888,rs113010165,.,rs116453055	0.04	0.24	0.14	0.05	1.95	-0.26
AC006129.2	ENKUR	ENKUR	ENKUR-201(*)	10	25351635	25351792	108.47	0	0	0	0	1	.	0.14	0.15	0.14	#-nan	#-nan	-0.83
AC006129.2	ENTPD7	ENTPD7	ENTPD7-001	10	101419133	101419230	68.16	0	0	0.01	0	1	rs192156029	#-nan	0	0	#-nan	-0.96	#-nan
AC006129.2	ENTPD7	ENTPD7	ENTPD7-002	10	101456637	101456725	60.86	0	0	0.012	0						#-nan	#-nan	#-nan
AC006129.2	ERCC6	ERCC6	ERCC6-010(*)	10	50685668	50685765	69.98	0	0	0	0	2	rs4253182,rs80202965	0.03	0.03	0.03	#-nan	#-nan	-0.99
AC006129.2	ERLIN1	ERLIN1	ERLIN1-002,ERLIN1-003	10	101945700	101945817	83.81	0.009	0	0.009	0	1	rs184354650	#-nan	0	0	#-nan	-0.96	#-nan
AC006129.2	EXOC6	EXOC6	EXOC6-001,EXOC6-003,EXOC6-203	10	94608708	94608792	60.05	0.012	0.021	0.021	0	1	rs192878970	0.05	0.06	0.05	#-nan	#-nan	-0.38
AC006129.2	EXOSC1,ZDHHC16	EXOSC1,ZDHHC16	EXOSC1-001,EXOSC1-003,EXOSC1-004,EXOSC1-005,EXOSC1-006,EXOSC1-008,EXOSC1-009,EXOSC1-010,EXOSC1-011,EXOSC1-012,EXOSC1-013,ZDHHC16-003,ZDHHC16-004,ZDHHC16-005,ZDHHC16-006,ZDHHC16-007,ZDHHC16-009,ZDHHC16-011,ZDHHC16-012,ZDHHC16-013,ZDHHC16-014,ZDHHC16-201	10	99205948	99206063	80.64	0.018	0	0	0						#-nan	#-nan	#-nan
AC006129.2	FAM107B	FAM107B	FAM107B-002,FAM107B-022	10	14590222	14590379	110.76	0	0	0	0						#-nan	#-nan	#-nan
AC006129.2	FAM107B	FAM107B	FAM107B-003,FAM107B-004,FAM107B-006,FAM107B-029	10	14646246	14646347	74.59	0.021	0	0	0						#-nan	#-nan	#-nan
AC006129.2	FAM107B	FAM107B	FAM107B-028	10	14565897	14566038	100.54	0	0	0	0						#-nan	#-nan	#-nan
AC006129.2	FAM13C	FAM13C	FAM13C-001,FAM13C-002,FAM13C-003,FAM13C-004,FAM13C-005,FAM13C-006,FAM13C-007,FAM13C-008,FAM13C-009,FAM13C-010,FAM13C-011,FAM13C-014,FAM13C-201	10	61122375	61122465	63.47	0.032	0.021	0.021	0						#-nan	#-nan	#-nan
AC006129.2	FAM160B1	FHIP2A	FAM160B1-001,FAM160B1-002,FAM160B1-003	10	116581366	116581496	92.88	0.025	0.026	0.008	0.016						#-nan	#-nan	#-nan
AC006129.2	FAM171A1	FAM171A1	FAM171A1-001,FAM171A1-002	10	15413084	15413193	79.92	0.065	0	0.005	0						#-nan	#-nan	#-nan
AC006129.2	FAM171A1	FAM171A1	FAM171A1-001,FAM171A1-002	10	15412710	15412936	162	0.065	0	0.005	0						#-nan	#-nan	#-nan
AC006129.2	FAM175B	ABRAXAS2	FAM175B-001	10	126488065	126488180	82.94	0	0	0.018	0	2	rs77130956,rs11245367	0.02	0.01	0.01	0.21	0.73	0.31
AC006129.2	FAM178A	SLF2	FAM178A-004	10	102700487	102700625	99.79	0.008	0.015	0.025	0	2	.,rs140077078	0.14	0	0.11	0.85	-1.03	-1.04
AC006129.2	FAM196A	INSYN2A	FAM196A-001,FAM196A-201(*)	10	128994846	128994971	84.86	0.008	0.008	0	0						#-nan	#-nan	#-nan
AC006129.2	FAM196A	INSYN2A	FAM196A-002	10	128974360	128974457	69.01	0	0	0	0						#-nan	#-nan	#-nan
AC006129.2	FAM208B	TASOR2	FAM208B-003,FAM208B-006,FAM208B-007,FAM208B-008,FAM208B-010	10	5726891	5726984	68.33	0.011	0	0.01	0						#-nan	#-nan	#-nan
AC006129.2	FAM208B	TASOR2	FAM208B-003,FAM208B-006,FAM208B-007,FAM208B-008,FAM208B-010	10	5727051	5727149	71.39	0.011	0	0.01	0	1	rs187700319	0.03	0.03	0.03	#-nan	#-nan	-0.64
AC006129.2	FAM208B	TASOR2	FAM208B-014	10	5750521	5750663	99.54	0.047	0.038	0.015	0	1	rs202195166	0.3	0	0.2	-0.19	-0.26	0.54
AC006129.2	FAM21A	WASHC2A	FAM21A-001,FAM21A-003,FAM21A-005,FAM21A-201,FAM21A-202,FAM21A-204(*)	10	51827721	51827841	85.97	0.083	0	0.036	0	4	rs4935425,.,rs114923840,.	0.08	0.42	0.28	0.77	1.74	-0.33
AC006129.2	FAM21A	WASHC2A	FAM21A-001,FAM21A-003,FAM21A-005,FAM21A-201,FAM21A-202	10	51827768	51827852	60.91	0.083	0	0.036	0	2	.,rs56738221	0.05	0.15	0.1	-0.01	#-nan	0.59
AC006129.2	FAM21C	WASHC2C	FAM21C-001,FAM21C-004,FAM21C-201,FAM21C-202,FAM21C-203,FAM21C-204	10	46222758	46222875	82.64	0.008	0	0	0						#-nan	#-nan	#-nan
AC006129.2	FAM21C	WASHC2C	FAM21C-001,FAM21C-004,FAM21C-201,FAM21C-202,FAM21C-203,FAM21C-204,FAM21C-006(*)	10	46222749	46222872	88.99	0.008	0	0	0						#-nan	#-nan	#-nan
AC006129.2	FAM25A,RP11-96C23.10	FAM25A,RP11-96C23.10	FAM25A-001,RP11-96C23.10-001	10	88778732	88778818	60.92	0.025	0	0	0						#-nan	#-nan	#-nan
AC006129.2	FAM25E	FAM25EP	FAM25E-001	10	46312750	46312871	86.05	0.008	0	0	0						#-nan	#-nan	#-nan
AC006129.2	FAM35A,GLUD1	SHLD2,GLUD1	FAM35A-001,FAM35A-002,FAM35A-003,GLUD1-001,GLUD1-201,GLUD1-202	10	88854765	88854925	113.74	0.02	0	0	0						#-nan	#-nan	#-nan
AC006129.2	FAM45A	DENND10	FAM45A-001,FAM45A-006,FAM45A-007,FAM45A-009,FAM45A-010,FAM45A-011,FAM45A-201,FAM45A-202	10	120863805	120863926	88.8	0.016	0	0	0						#-nan	#-nan	#-nan
AC006129.2	FAM45A	DENND10	FAM45A-001,FAM45A-006,FAM45A-007,FAM45A-009,FAM45A-010,FAM45A-011,FAM45A-201,FAM45A-202	10	120863784	120863920	100.79	0.016	0	0	0						#-nan	#-nan	#-nan
AC006129.2	FAM53B	FAM53B	FAM53B-001,FAM53B-003,FAM53B-004	10	126432502	126432602	73.15	0	0	0.022	0.01	1	.	0	0	0	#-nan	-0.9	-0.97
AC006129.2	FANK1	FANK1	FANK1-003,FANK1-004,FANK1-005,FANK1-006	10	127658863	127658948	61.32	0.071	0	0.012	0	1	rs185414157	0.02	0	0.01	-0.7	-0.9	#-nan
AC006129.2	FANK1,FANK1-AS1	FANK1,FANK1-AS1	FANK1-010,FANK1-AS1-001	10	127664380	127664474	66.96	0.04	0	0	0						#-nan	#-nan	#-nan
AC006129.2	FBXO18	FBH1	FBXO18-014	10	5943050	5943144	66.88	0.011	0.011	0.011	0	3	rs201504125,rs76992130,rs116408046	0.09	0.15	0.1	-0.44	0.1	-0.45
AC006129.2	FBXW4	FBXW4	FBXW4-001,FBXW4-002	10	103454726	103454851	89.86	0	0	0	0						#-nan	#-nan	#-nan
AC006129.2	FFAR4	FFAR4	FFAR4-001,FFAR4-002,FFAR4-003	10	95326769	95326932	115.87	0	0	0.006	0	1	rs145293912	0	0	0	#-nan	#-nan	-0.51
AC006129.2	FGF8	FGF8	FGF8-001,FGF8-002,FGF8-003,FGF8-004,FGF8-005,FGF8-006	10	103535556	103535714	110.46	0.006	0.007	0	0						#-nan	#-nan	#-nan
AC006129.2	FGF8	FGF8	FGF8-001,FGF8-002,FGF8-003,FGF8-004,FGF8-005,FGF8-006	10	103535559	103535727	117.18	0.006	0.007	0	0						#-nan	#-nan	#-nan
AC006129.2	FGFBP3,RP11-402D21.2	FGFBP3,RP11-402D21.2	FGFBP3-001,RP11-402D21.2-001	10	93668490	93668590	72.27	0.021	0	0	0						#-nan	#-nan	#-nan
AC006129.2	FGFR2	FGFR2	FGFR2-001,FGFR2-003,FGFR2-004,FGFR2-005,FGFR2-007,FGFR2-010,FGFR2-011,FGFR2-012,FGFR2-015,FGFR2-016,FGFR2-024,FGFR2-201,FGFR2-202,FGFR2-204(*)	10	123357913	123358005	65.18	0.1	0	0.014	0						#-nan	#-nan	#-nan
AC006129.2	FOXI2	FOXI2	FOXI2-001	10	129535673	129535777	76.81	0.032	0	0.01	0	1	.	#-nan	0	0	#-nan	-0.96	#-nan
AC006129.2	FRA10AC1	FRA10AC1	FRA10AC1-001,FRA10AC1-201,FRA10AC1-202,FRA10AC1-203	10	95462200	95462300	69.3	0.051	0.034	0.01	0.051	1	rs10748610	0.01	0.08	0.04	0.71	0	1.2
AC006129.2	FRAT1	FRAT1	FRAT1-001,FRAT1-002	10	99079477	99079624	108.34	0.015	0	0.007	0						#-nan	#-nan	#-nan
AC006129.2	FRAT2,RP11-452K12.4	FRAT2,RP11-452K12.4	FRAT2-001,RP11-452K12.4-001	10	99094014	99094172	115.19	0.014	0	0.006	0	1	rs181573119	0.17	0.05	0.1	0.66	-0.37	#-nan
AC006129.2	FRAT2,RP11-452K12.4	FRAT2,RP11-452K12.4	FRAT2-001,RP11-452K12.4-001	10	99094015	99094172	114.76	0.014	0	0.006	0	1	rs181573119	0.17	0.05	0.1	0.66	-0.37	#-nan
AC006129.2	FRMD4A	FRMD4A	FRMD4A-005	10	14017354	14017525	120.12	0	0	0	0						#-nan	#-nan	#-nan
AC006129.2	FRMD4A,RP11-295P9.6	FRMD4A,RP11-295P9.6	FRMD4A-007,FRMD4A-008,RP11-295P9.6-001	10	13749403	13749497	66.03	0	0	0	0						#-nan	#-nan	#-nan
AC006129.2	FRMD4A	FRMD4A	FRMD4A-010,FRMD4A-011	10	13699539	13699657	82.74	0.019	0	0.018	0	2	rs114781925,rs75171119	0.05	0	0.03	#-nan	-0.26	-0.69
AC006129.2	FUOM	FUOM	FUOM-001,FUOM-002,FUOM-003,FUOM-004,FUOM-201,FUOM-202	10	135171573	135171700	87.77	0.047	0	0	0						#-nan	#-nan	#-nan
AC006129.2	FUOM	FUOM	FUOM-001,FUOM-002,FUOM-003,FUOM-004,FUOM-201,FUOM-202	10	135171095	135171195	67.13	0.047	0	0	0						#-nan	#-nan	#-nan
AC006129.2	FZD8,MIR4683	FZD8,MIR4683	FZD8-001,MIR4683-201	10	35932597	35932732	97.63	0.007	0	0.015	0	2	rs116442441,.	0.02	0.01	0.01	#-nan	-0.9	-0.77
AC006129.2	FZD8,MIR4683	FZD8,MIR4683	FZD8-001,MIR4683-201	10	35932597	35932734	98.5	0.007	0	0.015	0	2	rs116442441,.	0.02	0.01	0.01	#-nan	-0.9	-0.77
AC006129.2	GATA3,GATA3-AS1,RP11-379F12.3	GATA3,GATA3-AS1,RP11-379F12.3	GATA3-001,GATA3-002,GATA3-003,GATA3-AS1-001,GATA3-AS1-002,GATA3-AS1-003,RP11-379F12.3-001,RP11-379F12.3-002	10	8096737	8096845	75.18	0.012	0.025	0.025	0.025						#-nan	#-nan	#-nan
AC006129.2	GBF1,PITX3	GBF1,PITX3	GBF1-001,PITX3-001	10	104003865	104003972	73.69	0.019	0.021	0.021	0	2	rs76667719,rs114883549	0.03	0.03	0.03	#-nan	#-nan	-0.86
AC006129.2	GBF1,PITX3	GBF1,PITX3	GBF1-001,PITX3-001	10	104003866	104003974	73.85	0.019	0.021	0.021	0	2	rs76667719,rs114883549	0.03	0.03	0.03	#-nan	#-nan	-0.86
AC006129.2	GDF10	GDF10	GDF10-001	10	48438703	48438824	85.2	0	0.021	0.021	0	2	rs1126827,rs145940940	0.12	0.05	0.06	0.8	1.32	0.62
AC006129.2	GDI2,RP11-318E3.9	GDI2,RP11-318E3.9	GDI2-001,GDI2-002,GDI2-004,GDI2-005,GDI2-008,GDI2-009,GDI2-201,RP11-318E3.9-001	10	5854938	5855059	86.05	0.009	0	0.018	0	2	rs182473763,rs77948341	0	0.04	0.02	-1.12	-0.42	-0.77
AC006129.2	GDI2,RP11-318E3.9	GDI2,RP11-318E3.9	GDI2-001,GDI2-002,GDI2-004,GDI2-005,GDI2-008,GDI2-009,GDI2-201,RP11-318E3.9-001	10	5854935	5855046	78.12	0.009	0	0.018	0	2	rs182473763,rs77948341	0	0.04	0.02	-1.12	-0.42	-0.77
AC006129.2	GFRA1	GFRA1	GFRA1-001,GFRA1-002,GFRA1-003,GFRA1-004,GFRA1-201	10	118032390	118032501	81.47	0.042	0.046	0.067	0	1	rs2577362	0.41	0.1	0.23	-0.19	1.58	1.91
AC006129.2	GHITM,RP11-338I21.1	GHITM,RP11-338I21.1	GHITM-001,RP11-338I21.1-001	10	85899371	85899495	88.18	0	0	0	0						#-nan	#-nan	#-nan
AC006129.2	GLRX3	GLRX3	GLRX3-001,GLRX3-002,GLRX3-003	10	131933970	131934192	153.59	0.057	0	0.019	0	3	rs11017097,rs3763762,rs3763761	0.08	0.07	0.08	0.24	0.81	0.9
AC006129.2	GLRX3	GLRX3	GLRX3-005	10	131955570	131955691	85.2	0.017	0	0.008	0	1	.	0	0.13	0.12	-0.97	0.39	#-nan
AC006129.2	GLUD1	GLUD1	GLUD1-002	10	88826983	88827077	64.17	0.011	0.011	0.011	0	1	rs7080134	0.09	0.15	0.23	0.76	1.6	1.79
AC006129.2	GOLGA7B,LINC00866	GOLGA7B,GOLGA7B-DT	GOLGA7B-001,LINC00866-001	10	99609858	99609990	93.29	0.008	0	0.007	0.008						#-nan	#-nan	#-nan
AC006129.2	GOLGA7B,LINC00866	GOLGA7B,GOLGA7B-DT	GOLGA7B-001,LINC00866-001	10	99609860	99609997	94.39	0.008	0	0.007	0.008	1	rs190531660	0.01	0.01	0.01	#-nan	#-nan	-0.9
AC006129.2	GOLGA7B	GOLGA7B	GOLGA7B-002,GOLGA7B-201	10	99625398	99625491	63.76	0.022	0	0.02	0	1	rs184784502	#-nan	0	0	#-nan	#-nan	#-nan
AC006129.2	GPR123	ADGRA1	GPR123-002	10	134916517	134916607	62.51	0.014	0	0.069	0	5	rs114906547,rs10857781,rs184637557,rs181418788,rs189912512	0.08	0.15	0.1	-0.6	-0.37	1.01
AC006129.2	GPR123,GPR123-AS1	ADGRA1,ADGRA1-AS1	GPR123-003,GPR123-AS1-001,GPR123-AS1-002(*)	10	134900572	134900680	76.02	0.014	0	0	0						#-nan	#-nan	#-nan
AC006129.2	GPR123	ADGRA1	GPR123-004	10	134884864	134885039	123.54	0.04	0.006	0.04	0	4	.,.,.,.	0.01	0	0	-0.57	-0.14	0.15
AC006129.2	GPR26	GPR26	GPR26-001	10	125425412	125425536	87.33	0.009	0	0.008	0	1	rs61861300	0.22	0	0.18	1.61	1.3	1.51
AC006129.2	GPRIN2	GPRIN2	GPRIN2-001	10	46993229	46993325	67.62	0	0.011	0.011	0.011						#-nan	#-nan	#-nan
AC006129.2	GRID1	GRID1	GRID1-001,GRID1-002	10	88125453	88125579	87.35	0.019	0	0.017	0	2	rs112024028,rs151208684	0.03	0.03	0.03	#-nan	#-nan	-0.86
AC006129.2	GRID1	GRID1	GRID1-001,GRID1-002	10	88126588	88126759	123.55	0.019	0	0.017	0	1	rs193214481	#-nan	0.02	0.02	#-nan	-0.71	#-nan
AC006129.2	GRK5,GRK5-IT1	GRK5,GRK5-IT1	GRK5-002,GRK5-IT1-001	10	120966847	120966958	81.47	0	0	0	0						#-nan	#-nan	#-nan
AC006129.2	GRK5	GRK5	GRK5-003	10	121210479	121210633	106.4	10	0	0.038	0	1	.	0.01	#-nan	0.01	-0.9	#-nan	#-nan
AC006129.2	GSTO1,WDR96	GSTO1,WDR96	GSTO1-002,WDR96-003,WDR96-005,WDR96-006,WDR96-201,WDR96-202	10	105991744	105991957	151.66	0.005	0.005	0.01	0.005	2	rs3740468,rs789577	0.32	0.22	0.24	-1.21	-0.21	1.73
AC006129.2	GSTO2	GSTO2	GSTO2-002,GSTO2-003,GSTO2-004,GSTO2-201,GSTO2-202	10	106034619	106034719	72.27	0.063	0	0.021	0						#-nan	#-nan	#-nan
AC006129.2	H2AFY2	MACROH2A2	H2AFY2-001,H2AFY2-002	10	71813682	71813802	85.63	0.049	0	0	0						#-nan	#-nan	#-nan
AC006129.2	HECTD2	HECTD2	HECTD2-001,HECTD2-005,HECTD2-201	10	93170074	93170338	189.65	0.016	0.004	0.004	0.004						#-nan	#-nan	#-nan
AC006129.2	HERC4	HERC4	HERC4-001,HERC4-006,HERC4-008,HERC4-009,HERC4-010,HERC4-011,HERC4-012,HERC4-013,HERC4-014,HERC4-015,HERC4-016,HERC4-201	10	69834572	69834660	62.62	0.015	0	0.015	0						#-nan	#-nan	#-nan
AC006129.2	HERC4	HERC4	HERC4-001,HERC4-006,HERC4-008,HERC4-009,HERC4-010,HERC4-011,HERC4-012,HERC4-013,HERC4-014,HERC4-015,HERC4-016,HERC4-201	10	69834575	69834675	69.3	0.015	0	0.015	0						#-nan	#-nan	#-nan
AC006129.2	HERC4	HERC4	HERC4-002,HERC4-007	10	69799062	69799152	63.42	0.024	0	0	0						#-nan	#-nan	#-nan
AC006129.2	HHEX	HHEX	HHEX-002,HHEX-003	10	94451286	94451378	62.42	0.011	0	0.011	0	1	rs76501574	0	0.11	0.05	-0.07	#-nan	0.14
AC006129.2	HHEX	HHEX	HHEX-002,HHEX-003,HHEX-004,HHEX-001(*)	10	94450121	94450231	77.96	0.011	0	0.011	0						#-nan	#-nan	#-nan
AC006129.2	HK1	HK1	HK1-001,HK1-006	10	71078342	71078431	63.94	0.011	0	0.011	0	1	rs140467647	0	#-nan	0	-0.97	#-nan	#-nan
AC006129.2	HK1	HK1	HK1-002	10	71098469	71098587	81.56	0.019	0.021	0.021	0	3	rs57741562,rs78220534,rs191392545	0.09	0.09	0.08	-0.97	-0.96	-0.47
AC006129.2	HKDC1	HKDC1	HKDC1-003	10	71007286	71007376	60.79	0.037	0	0.011	0						#-nan	#-nan	#-nan
AC006129.2	HMX2	HMX2	HMX2-001	10	124907952	124908042	65.26	0	0	0.012	0						#-nan	#-nan	#-nan
AC006129.2	HNRNPH3	HNRNPH3	HNRNPH3-001,HNRNPH3-003,HNRNPH3-004,HNRNPH3-009,HNRNPH3-010,HNRNPH3-011,HNRNPH3-012,HNRNPH3-201	10	70090432	70090519	61.32	0.057	0.012	0	0						#-nan	#-nan	#-nan
AC006129.2	HNRNPH3	HNRNPH3	HNRNPH3-001,HNRNPH3-003,HNRNPH3-004,HNRNPH3-009,HNRNPH3-010,HNRNPH3-011,HNRNPH3-012,HNRNPH3-201	10	70090432	70090520	60.9	0.057	0.012	0	0						#-nan	#-nan	#-nan
AC006129.2	HOGA1,PI4K2A	HOGA1,PI4K2A	HOGA1-001,HOGA1-002,HOGA1-003,PI4K2A-001,PI4K2A-201	10	99342986	99343089	70.38	0.078	0.058	0.058	0.013	1	rs2282373	0.44	0.01	0.3	1.2	1.41	0.98
AC006129.2	HOGA1,PI4K2A	HOGA1,PI4K2A	HOGA1-001,HOGA1-002,HOGA1-003,PI4K2A-001,PI4K2A-201	10	99343434	99343541	73.69	0.078	0.058	0.058	0.013	2	rs115015465,rs201115762	0.01	0.01	0.01	#-nan	-0.9	-0.9
AC006129.2	HPS6	HPS6	HPS6-001	10	103823722	103823824	69.77	0	0.01	0	0						#-nan	#-nan	#-nan
AC006129.2	HTR7	HTR7	HTR7-001,HTR7-002,HTR7-003,HTR7-201	10	92617470	92617602	98.12	0.008	0	0	0						#-nan	#-nan	#-nan
AC006129.2	IDE	IDE	IDE-001,IDE-002	10	94333858	94334002	103.25	0.007	0	0.007	0	1	rs4646953	0.09	0	0.08	1.23	-0.26	-0.09
AC006129.2	IDE	IDE	IDE-004,IDE-005	10	94242577	94242671	66.03	0.011	0	0.022	0						#-nan	#-nan	#-nan
AC006129.2	IDI1,WDR37	IDI1,WDR37	IDI1-003,WDR37-001	10	1092971	1093367	273.65	0.196	0.006	0.002	0						#-nan	#-nan	#-nan
AC006129.2	IL15RA	IL15RA	IL15RA-001,IL15RA-002,IL15RA-003,IL15RA-004,IL15RA-005,IL15RA-006,IL15RA-007,IL15RA-010,IL15RA-012,IL15RA-013,IL15RA-014,IL15RA-016,IL15RA-019,IL15RA-201,IL15RA-202,IL15RA-203	10	6019910	6020077	120.1	0.019	0.006	0.019	0.006	2	rs4749859,rs4749858	0.03	0.2	0.14	-0.61	0.69	-0.82
AC006129.2	IL15RA	IL15RA	IL15RA-001,IL15RA-002,IL15RA-003,IL15RA-004,IL15RA-005,IL15RA-006,IL15RA-007,IL15RA-010,IL15RA-012,IL15RA-013,IL15RA-014,IL15RA-016,IL15RA-019,IL15RA-201,IL15RA-202,IL15RA-203,IL15RA-204(*),IL15RA-205(*),IL15RA-206(*),IL15RA-207(*)	10	6019118	6019244	91.15	0.019	0.006	0.019	0.006	2	rs2274035,rs8177632	0.07	0.32	0.24	-0.07	1.77	-0.32
AC006129.2	IL2RA,RP11-536K7.5	IL2RA,IL2RA-AS1	IL2RA-005,RP11-536K7.5-001	10	6068759	6068856	68.04	0	0	0.011	0						#-nan	#-nan	#-nan
AC006129.2	IL2RA,RP11-536K7.5	IL2RA,IL2RA-AS1	IL2RA-005,RP11-536K7.5-001	10	6068744	6068853	76.68	0	0	0.011	0						#-nan	#-nan	#-nan
AC006129.2	INPP5A	INPP5A	INPP5A-001,INPP5A-002,INPP5A-004	10	134351184	134351283	71.71	0.011	0	0	0						#-nan	#-nan	#-nan
AC006129.2	INPP5A	INPP5A	INPP5A-003	10	134418620	134418770	102.41	0.03	0	0.007	0						#-nan	#-nan	#-nan
AC006129.2	INPP5A	INPP5A	INPP5A-006	10	134524125	134524327	145.58	0.029	0	0	0						#-nan	#-nan	#-nan
AC006129.2	INPP5A	INPP5A	INPP5A-007	10	134580421	134580587	116.34	0	0	0.012	0						#-nan	#-nan	#-nan
AC006129.2	INPP5F	INPP5F	INPP5F-001,INPP5F-201	10	121485400	121485689	208.22	0.022	0	0.003	0	1	rs183616108	0.02	0.02	0.02	#-nan	#-nan	-0.77
AC006129.2	INPP5F	INPP5F	INPP5F-002,INPP5F-003	10	121577989	121578132	99.96	0.015	0.007	0.007	0.007	1	rs7907781	0.05	0.05	0.05	#-nan	#-nan	-0.45
AC006129.2	ITGA8	ITGA8	ITGA8-001	10	15761914	15762049	98.11	0.016	0	0	0						#-nan	#-nan	#-nan
AC006129.2	ITGB1,RP11-462L8.1	ITGB1,ITGB1-DT	ITGB1-001,ITGB1-002,ITGB1-003,ITGB1-004,ITGB1-006,ITGB1-009,ITGB1-010,ITGB1-011,ITGB1-201,ITGB1-202,RP11-462L8.1-001	10	33247074	33247263	135.65	0.017	0	0.005	0	1	.	0	0.05	0.04	-0.01	#-nan	-0.38
AC006129.2	ITGB1	ITGB1	ITGB1-012	10	33296977	33297212	157.58	0.026	0.028	0.045	0	4	.,.,.,.	0.01	0.04	0.05	-1.08	0.08	-0.53
AC006129.2	ITIH5	ITIH5	ITIH5-001,ITIH5-201,ITIH5-202,ITIH5-203	10	7708978	7709167	133.76	0.068	0.011	0.017	0	1	.	0.05	0	0.04	0.32	-0.6	-0.57
AC006129.2	ITIH5	ITIH5	ITIH5-002	10	7683591	7683706	82.08	0.133	0.018	0.051	0	3	rs202189864,.,.	0.08	0.04	0.04	2.46	3.28	2.95
AC006129.2	ITPRIP	ITPRIP	ITPRIP-001	10	106097863	106097963	70.29	0.01	0	0.01	0	1	rs35497851	0.25	0.02	0.17	1.68	0.05	-0.51
AC006129.2	ITPRIP	ITPRIP	ITPRIP-002	10	106088749	106088843	65.94	0.102	0	0.022	0						#-nan	#-nan	#-nan
AC006129.2	JAKMIP3	JAKMIP3	JAKMIP3-001	10	133916867	133916975	74.11	0.02	0.021	0.021	0	4	.,rs12762662,.,rs12781788	0.09	0.01	0.04	0.82	2.13	2.71
AC006129.2	JMJD1C,JMJD1C-AS1	JMJD1C,JMJD1C-AS1	JMJD1C-001,JMJD1C-201,JMJD1C-AS1-001	10	65225710	65225898	137.09	0.093	0.018	0.04	0						#-nan	#-nan	#-nan
AC006129.2	KAT6B,RP11-222G7.2	KAT6B,RP11-222G7.2	KAT6B-001,KAT6B-002,KAT6B-003,KAT6B-006,KAT6B-007,RP11-222G7.2-001	10	76585182	76585324	103.81	0.014	0	0	0						#-nan	#-nan	#-nan
AC006129.2	KCNIP2	KCNIP2	KCNIP2-001,KCNIP2-002,KCNIP2-004,KCNIP2-006,KCNIP2-009,KCNIP2-010,KCNIP2-011,KCNIP2-013,KCNIP2-014,KCNIP2-201	10	103602911	103603028	81.48	0.021	0	0.021	0	1	.	0.05	0.05	0.05	#-nan	#-nan	-0.9
AC006129.2	KCNIP2	KCNIP2	KCNIP2-001,KCNIP2-002,KCNIP2-004,KCNIP2-006,KCNIP2-009,KCNIP2-011,KCNIP2-013,KCNIP2-014,KCNIP2-201	10	103603534	103603637	74.3	0.021	0	0.021	0	1	.	0.02	#-nan	0.02	-0.76	#-nan	#-nan
AC006129.2	KCNIP2	KCNIP2	KCNIP2-003,KCNIP2-007,KCNIP2-008	10	103590444	103590652	147.82	0.026	0.021	0.021	0	1	rs3781299	0.21	0.19	0.11	1.16	1.07	-0.9
AC006129.2	KCNMA1	KCNMA1	KCNMA1-001,KCNMA1-002,KCNMA1-003,KCNMA1-004,KCNMA1-005,KCNMA1-006,KCNMA1-007,KCNMA1-008,KCNMA1-009,KCNMA1-010,KCNMA1-014,KCNMA1-015,KCNMA1-201,KCNMA1-202,KCNMA1-203	10	79396877	79396994	85.85	0.009	0.021	0.021	0	1	rs112948235	0.06	0.06	0.06	#-nan	#-nan	-0.32
AC006129.2	KCNMA1	KCNMA1	KCNMA1-001,KCNMA1-002,KCNMA1-003,KCNMA1-004,KCNMA1-005,KCNMA1-006,KCNMA1-007,KCNMA1-008,KCNMA1-009,KCNMA1-010,KCNMA1-014,KCNMA1-015,KCNMA1-201,KCNMA1-202,KCNMA1-203,KCNMA1-204(*)	10	79398325	79398451	91.15	0.009	0.021	0.021	0	1	rs200540416	0.03	0.03	0.03	#-nan	#-nan	-0.86
AC006129.2	KCNMA1	KCNMA1	KCNMA1-002,KCNMA1-003,KCNMA1-004,KCNMA1-005,KCNMA1-006,KCNMA1-007,KCNMA1-008,KCNMA1-009,KCNMA1-014,KCNMA1-015,KCNMA1-201,KCNMA1-202,KCNMA1-203	10	79396617	79396743	89.03	0.009	0.021	0.021	0	1	rs76903211	0.14	0.15	0.14	#-nan	#-nan	0.45
AC006129.2	KCNMA1	KCNMA1	KCNMA1-002,KCNMA1-003,KCNMA1-004,KCNMA1-005,KCNMA1-006,KCNMA1-007,KCNMA1-008,KCNMA1-009,KCNMA1-014,KCNMA1-015,KCNMA1-201,KCNMA1-202,KCNMA1-203	10	79396618	79396744	89.89	0.009	0.021	0.021	0	1	rs76903211	0.14	0.15	0.14	#-nan	#-nan	0.45
AC006129.2	KCNMA1-AS1	KCNMA1-AS1	KCNMA1-AS1-010(*)	10	78700723	78700827	72.66	0	0	0	0	13	.,rs181494531,.,.,.,rs71475626,.,.,.,.,.,.,rs12769692	0.06	0.05	0.05	-1	-0.65	-0.41
AC006129.2	KIAA1462	JCAD	KIAA1462-002	10	30348837	30349024	129.17	0.005	0	0.011	0						#-nan	#-nan	#-nan
AC006129.2	KIAA1462	JCAD	KIAA1462-004	10	30305241	30305329	62.62	0	0	0	0						#-nan	#-nan	#-nan
AC006129.2	KIAA1598	SHTN1	KIAA1598-202	10	118886017	118886216	152.46	0.023	0.023	0.257	0						#-nan	#-nan	#-nan
AC006129.2	KIF11	KIF11	KIF11-001	10	94352918	94353044	89.89	0	0	0.017	0	1	rs113197692	0.14	0.15	0.15	#-nan	#-nan	0.49
AC006129.2	KLF6	KLF6	KLF6-001,KLF6-002,KLF6-003,KLF6-004,KLF6-201	10	3826920	3827046	86.53	0.017	0.01	0.01	0						#-nan	#-nan	#-nan
AC006129.2	KLF6	KLF6	KLF6-001,KLF6-002,KLF6-003,KLF6-201	10	3827775	3827875	73.15	0.017	0.01	0.01	0	1	rs12253538	0.01	0.01	0	0.66	0.61	0.08
AC006129.2	KLLN,PTEN	KLLN,PTEN	KLLN-001,PTEN-001,PTEN-002,PTEN-003	10	89623450	89623542	65.18	0.024	0.021	0.021	0						#-nan	#-nan	#-nan
AC006129.2	KLLN,PTEN	KLLN,PTEN	KLLN-001,PTEN-001,PTEN-002,PTEN-003	10	89623158	89623289	92.87	0.024	0.021	0.021	0	1	rs144620057	0.01	0	0	#-nan	-0.96	-0.83
AC006129.2	KLLN,PTEN	KLLN,PTEN	KLLN-001,PTEN-001,PTEN-002,PTEN-003,PTEN-006(*),PTEN-201(*)	10	89623664	89623754	65.26	0.024	0.021	0.021	0	1	rs12573787	0.1	0.28	0.17	0.57	1.69	-0.77
AC006129.2	KNDC1	KNDC1	KNDC1-001	10	134979415	134979506	61.2	0.055	0	0.011	0	1	rs140920593	0	0	0	#-nan	#-nan	-1.21
AC006129.2	LARP4B,RP11-363N22.2	LARP4B,LARP4B-DT	LARP4B-003,LARP4B-005,LARP4B-006,RP11-363N22.2-001,LARP4B-201(*)	10	978327	978703	266.25	0.08	0.003	0.008	0	3	.,.,.	0.07	0.04	0.1	0.36	-0.96	-0.95
AC006129.2	LBX1,LBX1-AS1	LBX1,LBX1-AS1	LBX1-001,LBX1-AS1-001,LBX1-AS1-002,LBX1-AS1-003	10	102989078	102989181	74.46	0.032	0.032	0.044	0.032	4	rs115460166,rs74861158,rs191570770,rs182903980	0.07	0.08	0.07	-0.37	#-nan	-0.23
AC006129.2	LBX1,LBX1-AS1	LBX1,LBX1-AS1	LBX1-001,LBX1-AS1-001,LBX1-AS1-002,LBX1-AS1-003	10	102989415	102989552	97.13	0.032	0.032	0.044	0.032						#-nan	#-nan	#-nan
AC006129.2	LCOR	LCOR	LCOR-009,LCOR-010,LCOR-015,LCOR-201	10	98591870	98592023	109.06	0.037	0	0	0						#-nan	#-nan	#-nan
AC006129.2	LCOR	LCOR	LCOR-009,LCOR-010,LCOR-015,LCOR-201	10	98592925	98593100	121.8	0.037	0	0	0						#-nan	#-nan	#-nan
AC006129.2	LDB1	LDB1	LDB1-001	10	103874539	103874702	116.64	0.013	0	0.006	0	1	rs3758554	#-nan	0.04	0.04	#-nan	-0.48	#-nan
AC006129.2	LDB1	LDB1	LDB1-001,LDB1-002	10	103873235	103873329	65.1	0.023	0	0.006	0						#-nan	#-nan	#-nan
AC006129.2	LDB3	LDB3	LDB3-005	10	88476154	88476245	62.1	0	0.021	0.021	0						#-nan	#-nan	#-nan
AC006129.2	LHPP	LHPP	LHPP-009	10	126298999	126299407	290.11	10	0.043	0.016	0						#-nan	#-nan	#-nan
AC006129.2	LINC00200	LINC00200	LINC00200-001,LINC00200-002	10	1203267	1203437	122.26	0.035	0.012	0.048	0.012	4	rs7090678,rs139188404,rs60157223;rs534039791,rs7094287	0.03	0.16	0.09	1.02	-0.7	1.43
AC006129.2	LINC00700	LINC00700	LINC00700-001,LINC00700-002,LINC00700-003	10	2057258	2057481	154.01	0.073	0.029	0.045	0	6	rs10903628,.,rs12774438,.,.,rs183059727	0.16	0.03	0.12	1.55	-0.59	-1.21
AC006129.2	LINC00702	LINC00702	LINC00702-001,LINC00702-002,LINC00702-003	10	4287715	4287802	62.2	0.057	0	0.025	0	1	rs142964627	#-nan	0	0	#-nan	-0.96	#-nan
AC006129.2	LINC00707	LINC00707	LINC00707-001	10	6820684	6820933	182.21	0.07	0	0.004	0	2	rs78798134,rs200321943	0.01	0.03	0.02	#-nan	#-nan	-0.57
AC006129.2	LINC00709	LINC00709	LINC00709-001	10	9315074	9315225	107.35	10	0.021	0.021	0	5	rs75943801,.,.,rs191464902,.	0.1	0.02	0.05	0.61	0.53	0.5
AC006129.2	LINC00839	LINC00839	LINC00839-001,LINC00839-002	10	42971293	42971387	67.89	0.012	0	0	0						#-nan	#-nan	#-nan
AC006129.2	LINC00843,PARG	TIMM23B-AGAP6,PARG	LINC00843-001,LINC00843-002,PARG-001(*)	10	51730384	51730496	81.03	0	0	0.009	0	1	rs7896643	0.24	0	0.22	1.43	-0.71	-0.77
AC006129.2	LINC00856	LINC00595	LINC00856-006(*)	10	79998281	79998375	64.17	0	0	0	0	1	rs7896957	0.14	0.02	0.11	#-nan	1.1	0.45
AC006129.2	LINC00863,NUTM2A-AS1	LINC00863,NUTM2A-AS1	LINC00863-001,NUTM2A-AS1-002,NUTM2A-AS1-004,NUTM2A-AS1-006,NUTM2A-AS1-008,NUTM2A-AS1-012,NUTM2A-AS1-013	10	89101736	89101842	74.55	0.022	0	0	0						#-nan	#-nan	#-nan
AC006129.2	LINC00863,NUTM2A-AS1	LINC00863,NUTM2A-AS1	LINC00863-001,NUTM2A-AS1-002,NUTM2A-AS1-004,NUTM2A-AS1-006,NUTM2A-AS1-008,NUTM2A-AS1-012,NUTM2A-AS1-013	10	89101735	89101836	71.57	0.022	0	0	0						#-nan	#-nan	#-nan
AC006129.2	LINC00948	MRLN	LINC00948-001,LINC00948-002,LINC00948-003	10	61512548	61512638	61.69	0.012	0	0	0	2	rs57158127,.	0.18	0	0.09	-0.97	-0.96	-0.26
AC006129.2	LINC00948	MRLN	LINC00948-004,LINC00948-005	10	61504144	61504304	112.89	0.209	0	0.091	0	5	rs61861085,rs1171587,rs186453782,rs1171588,rs1171589	0.17	0.13	0.12	0.94	1.15	0.4
AC006129.2	LINC00948	MRLN	LINC00948-004,LINC00948-005	10	61503560	61503675	79.8	0.209	0	0.091	0	4	rs140610318,rs188252340,rs114516053,rs191996702	0.04	0.05	0.05	-0.97	#-nan	-1.02
AC006129.2	LINC00948	MRLN	LINC00948-006,LINC00948-007,LINC00948-008(*),LINC00948-009(*)	10	61502426	61502514	61.77	0.051	0	0	0						#-nan	#-nan	#-nan
AC006129.2	LINC00993,Y_RNA.780	LINC00993,Y_RNA.780	LINC00993-001,Y_RNA.780-201	10	37594668	37594761	63.76	0	0.023	0.011	0	1	rs186838309	0	#-nan	0	-0.97	#-nan	#-nan
AC006129.2	LINC01165	LINC01165	LINC01165-001	10	134335763	134335907	96.88	0.061	0.031	0.067	0	5	.,rs143265325,.,.,.	0	0.09	0.06	1.06	0.82	0.49
AC006129.2	LIPA	LIPA	LIPA-001,LIPA-201	10	91011488	91011588	71.14	0.021	0	0	0						#-nan	#-nan	#-nan
AC006129.2	LRIT1	LRIT1	LRIT1-001	10	86000340	86000424	60.91	0	0	0.013	0						#-nan	#-nan	#-nan
AC006129.2	LRRC27	LRRC27	LRRC27-001	10	134165561	134165681	85.63	0	0	0	0						#-nan	#-nan	#-nan
AC006129.2	LRRC27,STK32C	LRRC27,STK32C	LRRC27-004,LRRC27-005,LRRC27-006,LRRC27-007,LRRC27-009,LRRC27-201,LRRC27-203,LRRC27-204,STK32C-005,STK32C-006,STK32C-007,STK32C-201	10	134145403	134145555	106.26	0.022	0	0.007	0	2	rs71013522,rs55737604	0.04	0.11	0.07	1.53	1.51	0.59
AC006129.2	LZTS2	LZTS2	LZTS2-001,LZTS2-002,LZTS2-005,LZTS2-006,LZTS2-007,LZTS2-008	10	102757979	102758076	65.28	0.023	0	0.011	0	1	rs116831785	0.02	0.03	0.02	#-nan	#-nan	-0.7
AC006129.2	LZTS2	LZTS2	LZTS2-001,LZTS2-006	10	102760530	102760628	66.5	0.023	0	0.011	0						#-nan	#-nan	#-nan
AC006129.2	MALRD1,RP11-354E11.2	MALRD1,MALRD1-AS1	MALRD1-005,RP11-354E11.2-001,RP11-354E11.2-002,RP11-354E11.2-003	10	20018460	20018567	74.76	0.02	0.044	0.021	0	2	rs77776857,rs184011110	0.01	0.05	0.05	#-nan	-0.31	-0.83
AC006129.2	MAP3K8	MAP3K8	MAP3K8-002,MAP3K8-004,MAP3K8-005,MAP3K8-006,MAP3K8-201	10	30723558	30723641	61.27	0	0.021	0.021	0	1	rs306588	0.06	0.16	0.08	1.48	1.88	0.45
AC006129.2	MAPK8	MAPK8	MAPK8-004,MAPK8-006,MAPK8-008,MAPK8-009,MAPK8-010,MAPK8-202(*)	10	49514441	49514530	62.16	0	0	0	0						#-nan	#-nan	#-nan
AC006129.2	MARCHF8	MARCHF8	MARCHF8-004,MARCHF8-005,MARCHF8-006,MARCHF8-201,MARCHF8-202	10	46090021	46090189	121.39	0.027	0.006	0.019	0						#-nan	#-nan	#-nan
AC006129.2	MARVELD1	MARVELD1	MARVELD1-001,MARVELD1-003,MARVELD1-004,MARVELD1-005	10	99474255	99474360	75.17	0.02	0	0.01	0	1	rs139003280	0.03	0.02	0.02	#-nan	-0.96	-0.64
AC006129.2	MCM10	MCM10	MCM10-001,MCM10-003,MCM10-004	10	13200461	13200576	79.49	0.039	0.019	0.019	0	1	.	#-nan	0	0	#-nan	-0.96	#-nan
AC006129.2	MCMBP	MCMBP	MCMBP-001,MCMBP-002,MCMBP-003	10	121632124	121632274	108.43	0	0	0.007	0	1	rs11556854	0	0.13	0.07	0.52	-0.96	0.4
AC006129.2	MCU	MCU	MCU-001,MCU-002,MCU-004,MCU-005,MCU-006,MCU-007,MCU-201	10	74451971	74452102	95.48	0	0	0	0						#-nan	#-nan	#-nan
AC006129.2	MCU	MCU	MCU-001,MCU-002,MCU-004,MCU-005,MCU-006,MCU-007,MCU-201	10	74452464	74452575	81.47	0	0	0	0						#-nan	#-nan	#-nan
AC006129.2	Metazoa_SRP.260	Metazoa_SRP.260	Metazoa_SRP.260-201(*)	10	14434012	14434102	64.33	0	0	0	0	4	rs72782830,.,.,rs11259051	0.04	0.08	0.06	0.87	0.31	2.09
AC006129.2	Metazoa_SRP.90	Metazoa_SRP.90	Metazoa_SRP.90-201(*)	10	79722980	79723091	73.66	0	0	0	0	2	rs1248900,rs149107149	0.24	0.01	0.16	0.66	1.96	1.91
AC006129.2	METTL10,RP11-12J10.3	EEF1AKMT2,RP11-12J10.3	METTL10-001,METTL10-002,METTL10-003,RP11-12J10.3-001	10	126480183	126480291	79.48	10	0	0.019	0	2	rs74866494,rs2277264	0.02	0	0.01	-0.15	0.73	-0.13
AC006129.2	METTL10	EEF1AKMT2	METTL10-006	10	126466791	126466882	61.1	0	0	0.023	0	2	rs77906614,rs74359827	0	0	0	#-nan	#-nan	-1.31
AC006129.2	MGEA5	OGA	MGEA5-002,MGEA5-003,MGEA5-004,MGEA5-005,MGEA5-201,MGEA5-202	10	103580945	103581039	66.88	0.011	0	0.023	0						#-nan	#-nan	#-nan
AC006129.2	MGMT	MGMT	MGMT-001,MGMT-002,MGMT-003	10	131265297	131265457	109.71	0.035	0.006	0.013	0.006	2	rs181536588,rs2782888	0.12	0.13	0.12	#-nan	#-nan	0.24
AC006129.2	MICU1	MICU1	MICU1-002,MICU1-006,MICU1-007,MICU1-010,MICU1-201,MICU1-202	10	74385805	74385933	90.74	0.008	0	0.017	0	1	rs190591340	0.03	0.03	0.03	#-nan	#-nan	-0.64
AC006129.2	MIR202HG	MIR202HG	MIR202HG-001,MIR202HG-002,MIR202HG-201	10	135063871	135064216	247.97	0.009	0	0.019	0	6	rs1891366,.,rs150256205,rs111068465,rs11101660,rs114193323	0.33	0.46	0.36	-0.32	-1.26	0.08
AC006129.2	MIR202HG	MIR202HG	MIR202HG-001,MIR202HG-002,MIR202HG-201	10	135063881	135064218	242.78	0.009	0	0.019	0	5	rs11101660,rs150256205,.,rs114193323,rs111068465	0.04	0.06	0.05	0.42	-0.77	2.02
AC006129.2	MIR3156-1	MIR3156-1	MIR3156-1-201	10	45658316	45658403	61.32	0.012	0	0.012	0						#-nan	#-nan	#-nan
AC006129.2	MIR346	MIR346	MIR346-201	10	88025930	88026027	67.2	0.01	0	0.01	0	1	rs181578808	0.01	0.01	0.01	#-nan	#-nan	-0.9
AC006129.2	MIR4294,RP11-523O18.1	MIR4294,RP11-523O18.1	MIR4294-201,RP11-523O18.1-001	10	50193826	50193952	91.15	0.038	0	0	0						#-nan	#-nan	#-nan
AC006129.2	MIR4682	MIR4682	MIR4682-201	10	121714978	121715063	61.32	0.053	0.025	0.074	0.025	4	rs11199130,rs10788002,rs184895216,rs74157699	0.04	0.04	0.08	0.75	0.23	0.75
AC006129.2	MIR5699	MIR5699	MIR5699-201	10	689394	689486	65.18	0.011	0	0	0						#-nan	#-nan	#-nan
AC006129.2	MKI67	MKI67	MKI67-001,MKI67-002,MKI67-004,MKI67-201(*)	10	129926964	129927069	72.86	0.066	0	0.02	0	3	.,.,.	0	0.01	0	1.45	1.8	1.55
AC006129.2	MKX,RP11-360I20.2	MKX,RP11-360I20.2	MKX-001,MKX-002,MKX-003,MKX-201,RP11-360I20.2-001	10	28033534	28033639	74.98	0.089	0	0.037	0	1	rs9334514	0.3	0.15	0.15	1.89	1.49	-0.26
AC006129.2	MKX,RP11-360I20.2	MKX,RP11-360I20.2	MKX-001,MKX-002,MKX-003,MKX-201,RP11-360I20.2-001	10	28034652	28034762	80.15	0.089	0	0.037	0						#-nan	#-nan	#-nan
AC006129.2	MKX,RP11-360I20.2	MKX,RP11-360I20.2	MKX-002,RP11-360I20.2-001	10	28031798	28031884	60.06	0.007	0	0.007	0	1	rs184593035	0	0	0	#-nan	#-nan	-0.97
AC006129.2	MKX,RP11-360I20.2	MKX,RP11-360I20.2	MKX-002,RP11-360I20.2-001	10	28031469	28031615	102.06	0.007	0	0.007	0	1	rs73604055	0.05	0.05	0.05	#-nan	#-nan	-0.45
AC006129.2	MLLT10	MLLT10	MLLT10-001,MLLT10-002,MLLT10-003,MLLT10-004,MLLT10-005,MLLT10-006,MLLT10-008,MLLT10-010,MLLT10-011,MLLT10-012,MLLT10-013,MLLT10-201,MLLT10-202	10	21822967	21823124	113.88	0.013	0	0.006	0						#-nan	#-nan	#-nan
AC006129.2	MMP21	MMP21	MMP21-001	10	127463039	127463147	78.19	0.01	0	0	0	1	rs201423894	0.03	0.02	0.04	1.48	1.72	0.9
AC006129.2	MMS19,UBTD1	MMS19,UBTD1	MMS19-003,MMS19-004,MMS19-005,MMS19-006,MMS19-007,MMS19-008,MMS19-009,MMS19-010,MMS19-012,MMS19-013,MMS19-018,MMS19-201,MMS19-202,UBTD1-001	10	99258528	99258674	103.52	0.012	0.021	0.021	0	2	rs17112841,rs29001242	0.01	0.1	0.11	0.8	1.96	0.25
AC006129.2	MMS19,UBTD1	MMS19,UBTD1	MMS19-003,MMS19-004,MMS19-005,MMS19-006,MMS19-007,MMS19-008,MMS19-009,MMS19-010,MMS19-012,MMS19-013,MMS19-018,MMS19-201,MMS19-202,UBTD1-001	10	99258489	99258664	122.64	0.012	0.021	0.021	0	3	rs17112841,rs17112837,rs29001242	0.01	0.09	0.1	0.8	1.19	-0.32
AC006129.2	MMS19	MMS19	MMS19-014	10	99232382	99232491	76.44	0.02	0	0.01	0	1	rs12569570	0.39	0.15	0.21	1.87	0.93	-0.83
AC006129.2	MSRB2	MSRB2	MSRB2-001	10	23384358	23384495	98.5	0.007	0	0	0						#-nan	#-nan	#-nan
AC006129.2	MTG1,RP11-108K14.8	MTG1,RP11-108K14.8	MTG1-001,MTG1-002,MTG1-003,MTG1-005,MTG1-006,MTG1-007,MTG1-008,RP11-108K14.8-001	10	135205622	135205761	97.44	0.007	0	0	0						#-nan	#-nan	#-nan
AC006129.2	MXI1	MXI1	MXI1-003,MXI1-006,MXI1-007,MXI1-009,MXI1-010,MXI1-011,MXI1-012	10	111986842	111986968	86.09	10	0.013	0	0						#-nan	#-nan	#-nan
AC006129.2	MXI1	MXI1	MXI1-003,MXI1-006,MXI1-007,MXI1-009,MXI1-010,MXI1-011,MXI1-012	10	111986699	111986939	162.79	10	0.013	0	0						#-nan	#-nan	#-nan
AC006129.2	MXI1	MXI1	MXI1-003,MXI1-006,MXI1-007,MXI1-009,MXI1-010,MXI1-011,MXI1-012	10	111986201	111986340	95.22	10	0.013	0	0	1	rs191718302	0.03	0.04	0.03	#-nan	#-nan	-0.57
AC006129.2	MXI1	MXI1	MXI1-004,MXI1-005,MXI1-008	10	111967387	111967492	71.81	0.01	0	0.01	0	1	rs76313351	0.02	0.06	0.04	-0.76	-0.21	#-nan
AC006129.2	MXI1,RP11-549L6.3	MXI1,RP11-549L6.3	MXI1-005,RP11-549L6.3-001	10	111969786	111969876	64.37	0.027	0	0.01	0						#-nan	#-nan	#-nan
AC006129.2	MYO3A,RP11-435M3.2	MYO3A,RP11-435M3.2	MYO3A-001,MYO3A-003,MYO3A-201,RP11-435M3.2-001	10	26223866	26223980	81.65	0.019	0.009	0.019	0.009	2	rs12244769,rs149163734	0.01	0.11	0.06	0.16	#-nan	-0.06
AC006129.2	MYOF	MYOF	MYOF-008	10	95091456	95091560	71.62	0.092	0	0.031	0	3	rs2797585,rs115834783,rs115536758	0.15	0.05	0.19	1.92	0.25	0.26
AC006129.2	NANOS1	NANOS1	NANOS1-001,NANOS1-002	10	120789246	120789370	90.67	0.065	0.037	0.037	0	1	.	0.27	0.2	0.15	1.88	1.76	-0.14
AC006129.2	NANOS1	NANOS1	NANOS1-001,NANOS1-002	10	120788082	120788170	61.77	0.065	0.037	0.037	0	1	rs181889255	0	0	0	#-nan	#-nan	-0.97
AC006129.2	NCOA4	NCOA4	NCOA4-001,NCOA4-005,NCOA4-201,NCOA4-202,NCOA4-203,NCOA4-205,NCOA4-004(*)	10	51565407	51565588	130.46	0.032	0.021	0.021	0	3	rs7909927,rs185613511,.	0.02	0.02	0.01	1.94	0.75	0.58
AC006129.2	NCOA4	NCOA4	NCOA4-001,NCOA4-005,NCOA4-201,NCOA4-202,NCOA4-203,NCOA4-205,NCOA4-002(*),NCOA4-003(*)	10	51565406	51565584	128.3	0.032	0.021	0.021	0	3	rs7909927,rs185613511,.	0.02	0.02	0.01	1.94	0.75	0.58
AC006129.2	NCOA4	NCOA4	NCOA4-002,NCOA4-003,NCOA4-004	10	51572219	51572324	75.17	0.018	0.012	0.018	0.006	3	rs150350741,rs138011461,rs190192819	0.02	0.02	0.02	#-nan	-0.83	-0.94
AC006129.2	NDST2,RP11-574K11.31	NDST2,RP11-574K11.31	NDST2-003,NDST2-008,NDST2-201,RP11-574K11.31-001	10	75574707	75574800	65.52	0	0.077	0.022	0						#-nan	#-nan	#-nan
AC006129.2	NEBL,NEBL-AS1	NEBL,NEBL-AS1	NEBL-003,NEBL-006,NEBL-008,NEBL-AS1-001,NEBL-AS1-002	10	21462884	21462970	63.49	0.013	0	0.013	0						#-nan	#-nan	#-nan
AC006129.2	NEBL,NEBL-AS1	NEBL,NEBL-AS1	NEBL-003,NEBL-006,NEBL-008,NEBL-AS1-001,NEBL-AS1-002	10	21462805	21462970	118.37	0.013	0	0.013	0	1	rs113394390	0.18	0.19	0.18	#-nan	#-nan	0.77
AC006129.2	NEBL,NEBL-AS1	NEBL,NEBL-AS1	NEBL-003,NEBL-006,NEBL-008,NEBL-AS1-001,NEBL-AS1-002	10	21463074	21463168	63.24	0.013	0	0.013	0						#-nan	#-nan	#-nan
AC006129.2	NEBL,NEBL-AS1	NEBL,NEBL-AS1	NEBL-003,NEBL-006,NEBL-008,NEBL-AS1-001,NEBL-AS1-002	10	21463502	21463591	64.82	0.013	0	0.013	0	1	rs117347142	0	0.01	0.01	-0.7	#-nan	-0.9
AC006129.2	NET1	NET1	NET1-005,NET1-201	10	5454590	5454708	85.1	0.009	0	0	0						#-nan	#-nan	#-nan
AC006129.2	NEURL1	NEURL1	NEURL1-001	10	105254222	105254366	99.77	0.007	0.007	0	0.007						#-nan	#-nan	#-nan
AC006129.2	NEURL1	NEURL1	NEURL1-002,NEURL1-003,NEURL1-201	10	105314877	105314980	70.38	0.01	0.01	0	0.01						#-nan	#-nan	#-nan
AC006129.2	NEURL1	NEURL1	NEURL1-004	10	105330888	105331002	78.25	0	0.009	0.009	0.009	1	rs12253987	0.17	0.17	0.13	0.37	0.44	1.87
AC006129.2	NEUROG3,RP11-343J3.2	NEUROG3,RP11-343J3.2	NEUROG3-001,RP11-343J3.2-001	10	71335567	71335653	60.92	0.099	0.024	0.038	0						#-nan	#-nan	#-nan
AC006129.2	NFKB2	NFKB2	NFKB2-005,NFKB2-008	10	104158989	104159139	105.42	0	0	0	0	2	.,rs55847683	0.21	0.2	0.19	#-nan	#-nan	#-nan
AC006129.2	NKX1-2	NKX1-2	NKX1-2-001,NKX1-2-201	10	126138512	126138633	86.05	0	0	0	0						#-nan	#-nan	#-nan
AC006129.2	NKX6-2	NKX6-2	NKX6-2-001	10	134602923	134603014	63	0	0.011	0.011	0.011	1	rs113339511	0	#-nan	0	-0.97	#-nan	#-nan
AC006129.2	NMT2	NMT2	NMT2-001,NMT2-002,NMT2-201	10	15210160	15210374	155.49	0.015	0	0	0						#-nan	#-nan	#-nan
AC006129.2	NOLC1	NOLC1	NOLC1-006	10	103920712	103920802	63.42	0	0	0	0						#-nan	#-nan	#-nan
AC006129.2	NPFFR1	NPFFR1	NPFFR1-001	10	72043469	72043568	71.71	0	0	0.011	0	1	rs77143297	0.08	0.09	0.08	#-nan	#-nan	-0.09
AC006129.2	NPY4R,CH17-360D5.1	NPY4R,NPY4R2	NPY4R-001,NPY4R-201,CH17-360D5.1-001(*),CH17-360D5.1-002(*)	10	47083098	47083276	122.22	0	0	0	0	1	.	0.01	0.11	0.09	1.45	-0.37	#-nan
AC006129.2	NRG3	NRG3	NRG3-001,NRG3-002,NRG3-003,NRG3-004,NRG3-005,NRG3-006,NRG3-007	10	83634873	83635034	114.17	0.014	0.014	0.014	0.014						#-nan	#-nan	#-nan
AC006129.2	NRG3	NRG3	NRG3-001,NRG3-002,NRG3-003,NRG3-004,NRG3-005,NRG3-006,NRG3-007	10	83634268	83634375	75.83	0.014	0.014	0.014	0.014	1	rs192966138	0.03	0.04	0.04	#-nan	#-nan	-0.57
AC006129.2	NRP1	NRP1	NRP1-001,NRP1-002,NRP1-003,NRP1-004,NRP1-005,NRP1-006,NRP1-201,NRP1-202,NRP1-203	10	33625891	33625987	69.55	0.087	0.008	0.035	0	1	rs150189270	0	0.03	0.01	-0.7	-0.96	-0.45
AC006129.2	NRP1	NRP1	NRP1-001,NRP1-002,NRP1-003,NRP1-004,NRP1-005,NRP1-006,NRP1-201,NRP1-202,NRP1-203	10	33624358	33624464	76.65	0.087	0.008	0.035	0	1	rs80286291	0.08	0.13	0.07	0.16	0.69	-0.9
AC006129.2	NRP1	NRP1	NRP1-001,NRP1-002,NRP1-003,NRP1-004,NRP1-005,NRP1-006,NRP1-201,NRP1-202,NRP1-203	10	33624409	33624539	95.05	0.087	0.008	0.035	0	3	rs80286291,rs140094860,rs74333859	0.07	0.12	0.06	0.16	-0.14	-1.12
AC006129.2	NRP1	NRP1	NRP1-002,NRP1-003,NRP1-004,NRP1-005,NRP1-006,NRP1-201,NRP1-202,NRP1-203	10	33623547	33623641	66.03	0.087	0.008	0.035	0						#-nan	#-nan	#-nan
AC006129.2	NRP1	NRP1	NRP1-011	10	33555952	33556054	73.01	0.021	0.01	0.021	0	1	rs7068390	0.32	0.31	0.19	1.68	1.71	-0.9
AC006129.2	NSMCE4A	NSMCE4A	NSMCE4A-005,NSMCE4A-006,NSMCE4A-007,NSMCE4A-008,NSMCE4A-009,NSMCE4A-010,NSMCE4A-012,NSMCE4A-013,NSMCE4A-201	10	123734547	123734644	69.12	0.034	0	0.015	0						#-nan	#-nan	#-nan
AC006129.2	NSUN6	NSUN6	NSUN6-002	10	18842061	18842174	78.96	0.009	0	0.009	0	1	rs144974510	#-nan	0.01	0.01	#-nan	-0.77	#-nan
AC006129.2	NT5C2	NT5C2	NT5C2-001	10	104935682	104935770	63.51	0	0	0	0						#-nan	#-nan	#-nan
AC006129.2	NT5C2	NT5C2	NT5C2-002,NT5C2-003,NT5C2-010,NT5C2-012,NT5C2-201	10	104952901	104953078	125.24	0.006	0.021	0.021	0	4	rs1141095,rs111622998,rs186518384,rs149363415	0.07	0.07	0.06	1.04	-0.47	-0.51
AC006129.2	NUTM2D	NUTM2D	NUTM2D-003	10	89125135	89125339	140.35	0.005	0	0	0						#-nan	#-nan	#-nan
AC006129.2	OAT	OAT	OAT-001,OAT-006,OAT-007,OAT-201	10	126106818	126106948	92.88	0.008	0	0	0						#-nan	#-nan	#-nan
AC006129.2	OGDHL	OGDHL	OGDHL-001,OGDHL-201,OGDHL-202	10	50970157	50970250	67.45	0.011	0	0	0						#-nan	#-nan	#-nan
AC006129.2	OGDHL	OGDHL	OGDHL-002	10	50949770	50950053	205.86	0.02	0	0.015	0	2	rs200353008,rs191015832	0.04	0.08	0.06	-0.94	-0.6	-0.97
AC006129.2	OGDHL	OGDHL	OGDHL-004	10	50956760	50956863	70.38	0	0	0.01	0	2	.,.	0.21	0.3	0.25	0.96	-0.71	#-nan
AC006129.2	OPALIN	OPALIN	OPALIN-001,OPALIN-201,OPALIN-202,OPALIN-203	10	98121674	98121772	65.53	0.033	0.033	0.047	0						#-nan	#-nan	#-nan
AC006129.2	OTUD1	OTUD1	OTUD1-001	10	23727726	23727853	88.2	0.008	0	0.008	0.008	1	rs187096502	0.02	0.03	0.02	#-nan	#-nan	-0.7
AC006129.2	P4HA1	P4HA1	P4HA1-001,P4HA1-002,P4HA1-201,P4HA1-202,P4HA1-203,P4HA1-204	10	74856304	74856434	94.17	0.024	0.021	0.021	0						#-nan	#-nan	#-nan
AC006129.2	PANK1,RP11-80H5.2	PANK1,PANK1-AS1	PANK1-001,PANK1-002,PANK1-003,PANK1-201,PANK1-202,RP11-80H5.2-001,RP11-80H5.2-002	10	91404274	91404465	139.28	0.011	0	0.005	0	1	rs11185826	0.12	0.11	0.08	1.16	1.23	1.95
AC006129.2	PAOX	PAOX	PAOX-001,PAOX-002,PAOX-003,PAOX-004,PAOX-005,PAOX-006,PAOX-007,PAOX-008,PAOX-013,PAOX-201	10	135192576	135192736	109.71	0.223	0	0.006	0	1	.	0.11	0.09	0.09	0.17	-0.91	-0.39
AC006129.2	PAOX,RP11-122K13.15	PAOX,RP11-122K13.15	PAOX-001,PAOX-002,PAOX-003,PAOX-004,PAOX-005,PAOX-006,PAOX-007,PAOX-008,PAOX-013,PAOX-201,RP11-122K13.15-001(*)	10	135191622	135191712	65.23	0.223	0	0.006	0	1	rs55914551	0.02	0.02	0.01	-0.63	-0.6	-0.03
AC006129.2	PAPSS2,RP11-57C13.3	PAPSS2,RP11-57C13.3	PAPSS2-001,PAPSS2-002,PAPSS2-003,PAPSS2-201,PAPSS2-202,RP11-57C13.3-001	10	89419632	89419730	68.46	0.044	0.022	0.091	0	4	rs10677560,rs185811230,rs201353575,rs182505319	0.03	0.03	0.04	-0.13	-1.25	-0.91
AC006129.2	PAPSS2,RP11-57C13.3	PAPSS2,RP11-57C13.3	PAPSS2-001,PAPSS2-002,PAPSS2-003,PAPSS2-201,PAPSS2-202,RP11-57C13.3-001	10	89419634	89419737	73.27	0.044	0.022	0.091	0	4	rs10677560,rs185811230,rs201353575,rs182505319	0.03	0.03	0.04	-0.13	-1.25	-0.91
AC006129.2	PARD3,PARD3-AS1	PARD3,PARD3-DT	PARD3-001,PARD3-002,PARD3-003,PARD3-004,PARD3-005,PARD3-006,PARD3-009,PARD3-010,PARD3-201,PARD3-203,PARD3-204,PARD3-AS1-001	10	35104128	35104438	220.24	0.024	0.007	0.014	0.01	3	rs188663328,rs193076331,rs12356003	0.02	0.01	0.01	0.42	0.49	0.86
AC006129.2	PARD3,PARD3-AS1	PARD3,PARD3-DT	PARD3-001,PARD3-002,PARD3-003,PARD3-004,PARD3-005,PARD3-006,PARD3-009,PARD3-010,PARD3-201,PARD3-203,PARD3-204,PARD3-AS1-001	10	35104006	35104243	167.84	0.024	0.007	0.014	0.01	3	rs12355985,rs193076331,rs12356003	0.05	0.16	0.1	1	1.96	1.61
AC006129.2	PARD3,PARD3-AS1	PARD3,PARD3-DT	PARD3-001,PARD3-002,PARD3-003,PARD3-004,PARD3-005,PARD3-006,PARD3-009,PARD3-010,PARD3-201,PARD3-203,PARD3-204,PARD3-AS1-001	10	35103972	35104107	95.42	0.024	0.007	0.014	0.01	1	rs12355985	0.17	0.41	0.25	0.66	1.89	#-nan
AC006129.2	PAX2	PAX2	PAX2-001,PAX2-002,PAX2-003,PAX2-004,PAX2-006,PAX2-007,PAX2-201,PAX2-202	10	102504732	102504834	72.85	0.027	0.021	0.021	0						#-nan	#-nan	#-nan
AC006129.2	PAX2	PAX2	PAX2-001,PAX2-002,PAX2-003,PAX2-004,PAX2-006,PAX2-007,PAX2-201,PAX2-202	10	102502558	102502679	82.8	0.027	0.021	0.021	0	1	rs4917908	0.01	0.26	0.14	0.93	-0.9	1.39
AC006129.2	PAX2	PAX2	PAX2-008	10	102492019	102492155	98.06	0	0	0.015	0	1	rs192659934	0	0	0	#-nan	#-nan	-0.97
AC006129.2	PCBD1	PCBD1	PCBD1-001,PCBD1-002,PCBD1-003	10	72647735	72647906	122.69	0.033	0.006	0.006	0.006	1	rs827240	0.01	0.01	0.01	#-nan	#-nan	-0.83
AC006129.2	PCDH15	PCDH15	PCDH15-003	10	55670219	55670307	60.86	0.057	0	0.012	0						#-nan	#-nan	#-nan
AC006129.2	PCDH15	PCDH15	PCDH15-019,PCDH15-025(*)	10	57386723	57386821	68.46	0	0	0	0						#-nan	#-nan	#-nan
AC006129.2	PCDH15	PCDH15	PCDH15-024(*)	10	55571990	55572099	76.44	0	0	0	0	2	rs34529023,rs71490981	0.01	0.09	0.06	-0.85	0.34	-0.83
AC006129.2	PCGF5	PCGF5	PCGF5-001,PCGF5-002,PCGF5-003,PCGF5-201,PCGF5-202	10	92980448	92980583	98.11	0.193	0	0.007	0						#-nan	#-nan	#-nan
AC006129.2	PCGF5	PCGF5	PCGF5-202(*)	10	92922597	92922739	100.11	0	0	0	0						#-nan	#-nan	#-nan
AC006129.2	PDCD4,PDCD4-AS1	PDCD4,PDCD4-AS1	PDCD4-001,PDCD4-002,PDCD4-003,PDCD4-004,PDCD4-201,PDCD4-AS1-001	10	112631720	112631906	132.49	0.011	0	0.01	0						#-nan	#-nan	#-nan
AC006129.2	PDCD4,RP11-313D6.3	PDCD4,RP11-313D6.3	PDCD4-001,PDCD4-002,PDCD4-003,PDCD4-004,PDCD4-201,RP11-313D6.3-001	10	112629242	112629351	76.68	0	0	0.012	0						#-nan	#-nan	#-nan
AC006129.2	PDCD4,RP11-313D6.3	PDCD4,RP11-313D6.3	PDCD4-001,PDCD4-002,PDCD4-003,PDCD4-004,PDCD4-201,RP11-313D6.3-001	10	112629235	112629323	61.77	0	0	0.012	0						#-nan	#-nan	#-nan
AC006129.2	PDLIM1	PDLIM1	PDLIM1-001,PDLIM1-002	10	97050954	97051050	71.48	0.011	0	0.011	0	1	rs149224397	0.01	0.06	0.03	#-nan	#-nan	#-nan
AC006129.2	PDSS1	PDSS1	PDSS1-001,PDSS1-201	10	26986629	26986719	65.23	0.051	0	0	0						#-nan	#-nan	#-nan
AC006129.2	PDZD7	PDZD7	PDZD7-005	10	102777543	102777657	79.07	0.072	0.028	0.128	0	3	.,.,.	0.13	0.22	0.14	2.59	1.84	3.22
AC006129.2	PDZD8	PDZD8	PDZD8-001,PDZD8-004	10	119134669	119134862	139.1	0.005	0	0.011	0	2	rs201074726,rs78645354	0.07	0.09	0.07	-0.63	#-nan	-0.09
AC006129.2	PFKFB3	PFKFB3	PFKFB3-001,PFKFB3-202,PFKFB3-203	10	6187158	6187261	70.38	0	0	0	0						#-nan	#-nan	#-nan
AC006129.2	PFKFB3,RP11-414H17.5	PFKFB3,PFKFB3-AS1	PFKFB3-002,PFKFB3-006,PFKFB3-007,PFKFB3-008,PFKFB3-009,PFKFB3-010,PFKFB3-012,PFKFB3-015,PFKFB3-201,RP11-414H17.5-001	10	6245805	6245921	83.38	0.071	0.019	0.043	0	3	rs148041220,rs202098028,rs117592975	0	0.08	0.07	-0.83	0.34	-0.83
AC006129.2	PFKFB3,RP11-414H17.5	PFKFB3,PFKFB3-AS1	PFKFB3-002,PFKFB3-006,PFKFB3-007,PFKFB3-008,PFKFB3-009,PFKFB3-010,PFKFB3-012,PFKFB3-015,PFKFB3-201,RP11-414H17.5-001	10	6245823	6245993	122.26	0.071	0.019	0.043	0	3	rs148041220,rs202098028,rs117592975	0	0.08	0.07	-0.83	0.34	-0.83
AC006129.2	PFKFB3	PFKFB3	PFKFB3-004,PFKFB3-005,PFKFB3-011,PFKFB3-013,PFKFB3-014	10	6262781	6262941	113.74	0.013	0	0.034	0	1	rs60679017	0.21	0.23	0.22	#-nan	#-nan	1.02
AC006129.2	PFKP,RP11-118K6.3	PFKP,PFKP-DT	PFKP-002,PFKP-003,PFKP-004,PFKP-005,PFKP-006,PFKP-012,RP11-118K6.3-001	10	3109495	3109621	89.89	0.037	0	0.008	0						#-nan	#-nan	#-nan
AC006129.2	PFKP	PFKP	PFKP-008,PFKP-009,PFKP-010	10	3147232	3147326	66.96	0.011	0	0.023	0	1	rs147984433	#-nan	0.02	0.03	#-nan	-0.65	#-nan
AC006129.2	PFKP	PFKP	PFKP-011	10	3152937	3153180	168.08	0.015	0.004	0.022	0.004	9	rs201838548,rs201325970,rs201359977,rs112903122,rs140189484,rs201845139;rs186518635,rs200257637,rs115175268,rs113036381	0.1	0.09	0.09	-0.97	#-nan	-0.66
AC006129.2	PHYH	PHYH	PHYH-001,PHYH-002,PHYH-003,PHYH-004,PHYH-006	10	13340865	13340959	65	0.129	0.049	0.077	0	3	rs11258314,rs189379749,rs113246193	0.08	0.22	0.12	2.53	1.2	3.32
AC006129.2	PHYHIPL	PHYHIPL	PHYHIPL-004	10	60996109	60996201	66.1	0	0	0	0						#-nan	#-nan	#-nan
AC006129.2	PIK3AP1	PIK3AP1	PIK3AP1-001	10	98480064	98480251	133.92	0.005	0.005	0	0.005						#-nan	#-nan	#-nan
AC006129.2	PIK3AP1,RNA5SP324	PIK3AP1,RNA5SP324	PIK3AP1-006,RNA5SP324-201	10	98377398	98377485	63.95	0.053	0	0.037	0	2	rs117051884,rs140118902	0	0.08	0.08	#-nan	-0.05	-0.97
AC006129.2	PIP4K2A	PIP4K2A	PIP4K2A-001,PIP4K2A-005	10	23003302	23003644	246.67	0.016	0	0.003	0						#-nan	#-nan	#-nan
AC006129.2	PIP4K2A	PIP4K2A	PIP4K2A-008	10	22980281	22980385	71.62	0.01	0	0.02	0	1	rs74121888	0.32	0.16	0.21	-0.83	0.15	1.73
AC006129.2	PITRM1	PITRM1	PITRM1-005,PITRM1-008	10	3202909	3203004	66.36	0.011	0.021	0.021	0	3	rs61611140,.,.	0.09	0.08	0.05	1.92	2.1	1.92
AC006129.2	PITRM1	PITRM1	PITRM1-007,PITRM1-201,PITRM1-202	10	3215096	3215199	73.27	0.01	0	0.01	0	1	rs9423713	0.03	0	0.02	1.92	1.51	1.56
AC006129.2	PITX3	PITX3	PITX3-201	10	103992997	103993091	64.17	0.05	0	0	0						#-nan	#-nan	#-nan
AC006129.2	PLAC9	PLAC9	PLAC9-001,PLAC9-002,PLAC9-003	10	81892250	81892351	73.58	0.01	0	0.021	0	2	rs2257025,.	0.38	0.07	0.22	1.82	1.46	0.35
AC006129.2	PLCE1	PLCE1	PLCE1-201	10	95753734	95753883	107.14	0	0.007	0.014	0.014	3	rs75639609,rs2911857,rs200055104	0.04	0.03	0.04	1.35	1.6	1.56
AC006129.2	PLEKHA1	PLEKHA1	PLEKHA1-001,PLEKHA1-002,PLEKHA1-007,PLEKHA1-009,PLEKHA1-201	10	124134389	124134499	77.96	0.02	0	0.019	0						#-nan	#-nan	#-nan
AC006129.2	PLEKHA1	PLEKHA1	PLEKHA1-001,PLEKHA1-002,PLEKHA1-007,PLEKHA1-009,PLEKHA1-201	10	124133999	124134102	73.27	0.02	0	0.019	0	1	rs7900012	0.18	0.01	0.19	0.93	#-nan	-0.9
AC006129.2	PLXDC2	PLXDC2	PLXDC2-001,PLXDC2-002	10	20104713	20104797	60.05	0	0	0	0						#-nan	#-nan	#-nan
AC006129.2	PLXDC2	PLXDC2	PLXDC2-003	10	20333062	20333236	121.38	0.113	0.031	0.032	0	3	.,.,.	0.05	0.06	0.05	-1.21	-0.83	-0.76
AC006129.2	PPAPDC1A	PLPP4	PPAPDC1A-002,PPAPDC1A-201,PPAPDC1A-202,PPAPDC1A-203,PPAPDC1A-204	10	122216295	122216410	81.79	0.009	0	0	0	1	rs200858033	0.01	#-nan	0.01	1.51	#-nan	#-nan
AC006129.2	PPP3CB,RP11-137L10.6	PPP3CB,RP11-137L10.6	PPP3CB-001,PPP3CB-002,PPP3CB-201,PPP3CB-202,PPP3CB-203,PPP3CB-205,RP11-137L10.6-001,RP11-137L10.6-002,RP11-137L10.6-003,RP11-137L10.6-004,RP11-137L10.6-005,RP11-137L10.6-006,RP11-137L10.6-007,RP11-137L10.6-008,RP11-137L10.6-009,RP11-137L10.6-010,RP11-137L10.6-011	10	75255618	75255713	67.31	0	0	0.011	0						#-nan	#-nan	#-nan
AC006129.2	PPP3CB,RP11-137L10.6,PPP3CB-AS1	PPP3CB,RP11-137L10.6,PPP3CB-AS1	PPP3CB-001,PPP3CB-002,PPP3CB-201,PPP3CB-202,PPP3CB-203,PPP3CB-205,RP11-137L10.6-001,RP11-137L10.6-002,RP11-137L10.6-003,RP11-137L10.6-004,RP11-137L10.6-005,RP11-137L10.6-006,RP11-137L10.6-007,RP11-137L10.6-008,RP11-137L10.6-009,RP11-137L10.6-010,RP11-137L10.6-011,PPP3CB-AS1-012(*),PPP3CB-AS1-013(*),PPP3CB-AS1-014(*),PPP3CB-AS1-015(*)	10	75255614	75255712	69.44	0	0	0.011	0						#-nan	#-nan	#-nan
AC006129.2	PPRC1	PPRC1	PPRC1-001,PPRC1-201	10	103893041	103893144	76.37	0.01	0.01	0.01	0.01						#-nan	#-nan	#-nan
AC006129.2	PRAP1,RP11-122K13.7	PRAP1,RP11-122K13.7	PRAP1-002,RP11-122K13.7-001	10	135162764	135162991	161.03	0.016	0	0.033	0	1	rs4838725	0.27	0.24	0.24	#-nan	-0.83	1.33
AC006129.2	PRAP1,RP11-122K13.7	PRAP1,RP11-122K13.7	PRAP1-002,RP11-122K13.7-001	10	135164795	135164927	91.49	0.016	0	0.033	0	2	rs79130099,rs183041551	0.26	0.35	0.29	-1.08	#-nan	1.65
AC006129.2	PRDX3	PRDX3	PRDX3-003	10	120930386	120930483	67.07	0.011	0.021	0.021	0	2	rs12763273,rs115900350	0.37	0.05	0.24	1.82	1.23	-0.17
AC006129.2	PRKCQ,PRKCQ-AS1	PRKCQ,PRKCQ-AS1	PRKCQ-001,PRKCQ-201,PRKCQ-202,PRKCQ-AS1-001,PRKCQ-AS1-002,PRKCQ-AS1-003,PRKCQ-AS1-004,PRKCQ-AS1-007(*)	10	6622185	6622325	100.2	0.032	0.014	0.009	0.014						#-nan	#-nan	#-nan
AC006129.2	PRKCQ,PRKCQ-AS1	PRKCQ,PRKCQ-AS1	PRKCQ-001,PRKCQ-201,PRKCQ-202,PRKCQ-AS1-001,PRKCQ-AS1-004	10	6622069	6622296	163.3	0.032	0.014	0.009	0.014	2	rs11259670,rs12250403	0.47	0.23	0.28	1.21	2.58	1.08
AC006129.2	PRKG1	PRKG1	PRKG1-001,PRKG1-201	10	52751434	52751520	62.63	0	0	0	0						#-nan	#-nan	#-nan
AC006129.2	PROSER2	PROSER2	PROSER2-004,PROSER2-005,PROSER2-201(*)	10	11865542	11865675	97.24	0	0	0.008	0						#-nan	#-nan	#-nan
AC006129.2	PROSER2-AS1	PROSER2-AS1	PROSER2-AS1-001	10	11936899	11937008	78.62	0	0	0.019	0	2	rs17151005,rs73569368	0.21	0.22	0.22	#-nan	#-nan	1.37
AC006129.2	PRR26	DIP2C-AS1	PRR26-001,PRR26-002	10	696257	696343	60.06	0.024	0	0.024	0	1	rs184617249	0.06	0.07	0.07	#-nan	#-nan	-0.26
AC006129.2	PRTFDC1,RP11-165A20.3	PRTFDC1,RP11-165A20.3	PRTFDC1-001,PRTFDC1-002,PRTFDC1-003,RP11-165A20.3-001	10	25241720	25241856	98.55	0.025	0.008	0.017	0.008						#-nan	#-nan	#-nan
AC006129.2	PRTFDC1,RP11-165A20.3	PRTFDC1,RP11-165A20.3	PRTFDC1-001,PRTFDC1-002,PRTFDC1-003,RP11-165A20.3-001	10	25241496	25241624	90.74	0.025	0.008	0.017	0.008	2	rs191331757,rs143356584	#-nan	0.01	0.01	#-nan	-1.21	#-nan
AC006129.2	PSD	PSD	PSD-008,PSD-011	10	104169051	104169175	86.1	0.008	0.021	0.021	0						#-nan	#-nan	#-nan
AC006129.2	PSD	PSD	PSD-009,PSD-011	10	104170752	104170850	67.48	0	0.021	0.021	0	2	rs12254663,rs73349028	0.1	0.11	0.11	#-nan	#-nan	-0.4
AC006129.2	PSD,AL121928.1	PSD,AL121928.1	PSD-009,PSD-011,AL121928.1-201(*)	10	104170749	104170837	60.86	0	0.021	0.021	0	1	rs73349028	0.01	0.01	0.01	#-nan	#-nan	-0.64
AC006129.2	PSD	PSD	PSD-010	10	104164564	104164656	64.26	0.023	0	0.011	0						#-nan	#-nan	#-nan
AC006129.2	PSTK	PSTK	PSTK-001,PSTK-002,PSTK-003,PSTK-004,PSTK-005,PSTK-007,PSTK-008,PSTK-201	10	124740036	124740152	84.53	0.018	0.021	0.021	0	1	rs79913180	0.01	0.06	0.05	-0.9	-0.21	#-nan
AC006129.2	PSTK	PSTK	PSTK-001,PSTK-002,PSTK-003,PSTK-004,PSTK-005,PSTK-007,PSTK-008,PSTK-201	10	124739990	124740249	186.62	0.018	0.021	0.021	0	1	rs79913180	0.01	0.06	0.05	-0.9	-0.21	#-nan
AC006129.2	PTCHD3	PTCHD3	PTCHD3-001,PTCHD3-201(*)	10	27702762	27702912	105.42	0.007	0	0.028	0	2	rs12098477,rs62624974	0.12	0.12	0.12	#-nan	#-nan	#-nan
AC006129.2	PTPLA	HACD1	PTPLA-001,PTPLA-002,PTPLA-003	10	17659348	17659500	109.3	0.014	0	0.022	0	1	rs76308933	0.04	#-nan	0.04	-0.5	#-nan	#-nan
AC006129.2	PTPRE	PTPRE	PTPRE-001	10	129865182	129865339	108.47	0.03	0.013	0.013	0	1	rs185438323	0	0.08	0.07	-0.97	-0.1	#-nan
AC006129.2	PTPRE	PTPRE	PTPRE-002,PTPRE-004,PTPRE-005,PTPRE-009,PTPRE-010	10	129845655	129845743	63.5	0	0	0.053	0	3	rs114845417,rs199790120,rs149070542	0.04	0.04	0.04	#-nan	-0.96	-0.95
AC006129.2	PTPRE	PTPRE	PTPRE-003,PTPRE-007	10	129705859	129705967	77.11	0.016	0	0	0						#-nan	#-nan	#-nan
AC006129.2	PTPRE	PTPRE	PTPRE-003,PTPRE-007	10	129705637	129705770	95.9	0.016	0	0	0						#-nan	#-nan	#-nan
AC006129.2	PTPRE	PTPRE	PTPRE-011	10	129858236	129858358	86.48	0.018	0	0.027	0	3	rs11016045,rs115279986,rs145162384	0.04	0.08	0.04	0.42	1.35	0.93
AC006129.2	PYROXD2	PYROXD2	PYROXD2-003	10	100148212	100148300	60.9	0	0	0.012	0	1	rs41290474	0	#-nan	0	-0.9	#-nan	#-nan
AC006129.2	RAB18	RAB18	RAB18-001,RAB18-002,RAB18-003,RAB18-004,RAB18-005,RAB18-006,RAB18-201,RAB18-202(*),RAB18-203(*)	10	27793387	27793527	99.26	0	0	0.015	0						#-nan	#-nan	#-nan
AC006129.2	RASGEF1A	RASGEF1A	RASGEF1A-001	10	43762321	43762452	96.79	0.039	0	0	0						#-nan	#-nan	#-nan
AC006129.2	RASGEF1A	RASGEF1A	RASGEF1A-002	10	43725167	43725325	110.46	0.027	0	0	0						#-nan	#-nan	#-nan
AC006129.2	RASGEF1A	RASGEF1A	RASGEF1A-004,RASGEF1A-005	10	43698249	43698434	129.36	0.006	0	0	0						#-nan	#-nan	#-nan
AC006129.2	RASSF4	RASSF4	RASSF4-001,RASSF4-002,RASSF4-005,RASSF4-008,RASSF4-201,RASSF4-202	10	45452903	45453038	96.77	0.009	0	0.007	0						#-nan	#-nan	#-nan
AC006129.2	RASSF4,RP11-285G1.14,TMEM72-AS1	RASSF4,RP11-285G1.14,TMEM72-AS1	RASSF4-001,RASSF4-002,RASSF4-005,RASSF4-008,RASSF4-201,RASSF4-202,RP11-285G1.14-001,TMEM72-AS1-001	10	45455079	45455173	64.06	0.011	0	0.007	0						#-nan	#-nan	#-nan
AC006129.2	RASSF4,RP11-285G1.14,TMEM72-AS1	RASSF4,RP11-285G1.14,TMEM72-AS1	RASSF4-001,RASSF4-002,RASSF4-005,RASSF4-008,RASSF4-201,RASSF4-202,RP11-285G1.14-001,TMEM72-AS1-001	10	45455083	45455175	63.34	0.011	0	0.007	0						#-nan	#-nan	#-nan
AC006129.2	RASSF4	RASSF4	RASSF4-012	10	45468578	45468675	68.16	0.01	0	0	0						#-nan	#-nan	#-nan
AC006129.2	RBM17	RBM17	RBM17-003,RBM17-005,RBM17-007,RBM17-201	10	6131037	6131179	104.34	0	0	0.007	0	1	rs140764661	0	0.12	0.11	-0.83	0.61	-0.9
AC006129.2	RBM20,Y_RNA.692	RBM20,Y_RNA.692	RBM20-001,Y_RNA.692-201	10	112403701	112403797	70.6	0.011	0	0	0						#-nan	#-nan	#-nan
AC006129.2	RBM20,Y_RNA.692	RBM20,Y_RNA.692	RBM20-001,Y_RNA.692-201	10	112404100	112404217	84.97	0.011	0	0	0						#-nan	#-nan	#-nan
AC006129.2	RBP4	RBP4	RBP4-001,RBP4-002,RBP4-003,RBP4-201(*)	10	95360852	95360999	104.8	0.009	0.014	0.007	0.007	1	rs10882283	0	0.12	0.08	1.59	0.1	1.51
AC006129.2	REEP3	REEP3	REEP3-001,REEP3-201	10	65281574	65281679	76.03	0.01	0	0.01	0.031	2	.,rs5785578	0.02	0.01	0.02	-0.7	#-nan	#-nan
AC006129.2	RET	RET	RET-001,RET-002,RET-003,RET-201(*)	10	43572275	43572366	60.3	0	0	0.023	0	1	rs115549558	0.13	0.2	0.15	-0.76	#-nan	0.81
AC006129.2	RGS10	RGS10	RGS10-003	10	121278894	121279221	238.27	0.021	0.016	0.013	0	4	.,.,.,.	0.07	0.07	0.07	-0.76	0.71	-0.39
AC006129.2	RHOBTB1	RHOBTB1	RHOBTB1-001	10	62761271	62761371	68.31	0	0	0	0						#-nan	#-nan	#-nan
AC006129.2	RHOBTB1	RHOBTB1	RHOBTB1-002	10	62703927	62704081	112.57	0	0.007	0	0.007						#-nan	#-nan	#-nan
AC006129.2	RN7SL524P	RN7SL524P	RN7SL524P-201	10	105734361	105734448	61.32	0.102	0.024	0.012	0	1	.	0.02	0.03	0.02	#-nan	#-nan	-0.7
AC006129.2	RNLS	RNLS	RNLS-002,RNLS-003,RNLS-004,RNLS-201	10	90342578	90342685	75.83	0.019	0	0.009	0	1	rs182339292	0	0	0	#-nan	#-nan	-0.97
AC006129.2	RNU6-1231P	RNU6-1231P	RNU6-1231P-201	10	104561600	104561709	77.53	0.009	0.01	0.009	0						#-nan	#-nan	#-nan
AC006129.2	RNU6-163P	RNU6-163P	RNU6-163P-201	10	4556313	4556481	118.85	0.062	0	0.006	0	1	rs150915427	0	0	0	#-nan	#-nan	-0.97
AC006129.2	RNU6-847P	RNU6-847P	RNU6-847P-201	10	35215062	35215152	62.51	0.026	0.055	0.164	0	3	rs11498304,rs183953601,rs199615352	0.06	0.06	0.06	#-nan	#-nan	-0.96
AC006129.2	RNU6-908P	RNU6-908P	RNU6-908P-201	10	29997718	29997812	64.06	0.023	0	0.011	0	1	rs2479448	0	0	0	1.74	1.69	1.51
AC006129.2	RNU7-22P	RNU7-22P	RNU7-22P-201	10	32461195	32461293	67.48	0.01	0	0.021	0	2	.,rs116053901	0.02	0.01	0.01	#-nan	#-nan	-0.83
AC006129.2	RP11-119K6.6	RP11-119K6.6	RP11-119K6.6-001	10	96335483	96335570	62.2	0	0.012	0.012	0						#-nan	#-nan	#-nan
AC006129.2	RP11-124O11.1	LINC02623	RP11-124O11.1-001	10	43365068	43365252	124.44	0.208	0	0.042	0	7	rs140257144,rs148568016,.,.,rs181739019,rs143152415,rs3121322	0.03	0.08	0.04	-0.5	-1.23	-0.33
AC006129.2	RP11-127O4.3	LINC02620	RP11-127O4.3-001	10	106239514	106239636	87.7	0.069	0.008	0.071	0	1	.	0.19	0.03	0.1	1.82	-0.96	-0.9
AC006129.2	RP11-128B16.3	LINC03028	RP11-128B16.3-002	10	26868697	26868799	71.99	0	0	0.046	0	2	rs787007,rs148123837	0.22	0.03	0.13	0.48	0.44	-0.32
AC006129.2	RP11-129J12.1,RP11-129J12.2	RP11-129J12.1,RP11-129J12.2	RP11-129J12.1-001,RP11-129J12.2-002	10	101286653	101286833	127.37	0	0.006	0.012	0.006						#-nan	#-nan	#-nan
AC006129.2	RP11-129J12.1,RP11-129J12.2	RP11-129J12.1,RP11-129J12.2	RP11-129J12.1-001,RP11-129J12.2-002	10	101286653	101286830	124.32	0	0.006	0.012	0.006						#-nan	#-nan	#-nan
AC006129.2	RP11-129M16.4	RP11-129M16.4	RP11-129M16.4-001(*)	10	119028590	119028875	196.24	0	0	0	0	3	.,rs73393089,rs200452695	0.03	0	0.02	#-nan	#-nan	-0.97
AC006129.2	RP11-137H2.4,SH2D4B	TSPAN14-AS1,SH2D4B	RP11-137H2.4-001,SH2D4B-005,SH2D4B-201,SH2D4B-202	10	82298671	82298781	72.47	0.04	0.021	0.021	0						#-nan	#-nan	#-nan
AC006129.2	RP11-138I18.1,USP6NL	USP6NL-AS1,USP6NL	RP11-138I18.1-001,USP6NL-001,USP6NL-002	10	11653175	11653268	67.39	0.006	0	0	0						#-nan	#-nan	#-nan
AC006129.2	RP11-138I18.1,USP6NL	USP6NL-AS1,USP6NL	RP11-138I18.1-001,USP6NL-001,USP6NL-002	10	11653202	11653379	127.01	0.006	0	0	0						#-nan	#-nan	#-nan
AC006129.2	RP11-150D20.5	RP11-150D20.5	RP11-150D20.5-001	10	73815571	73815671	71.28	0.011	0	0.01	0						#-nan	#-nan	#-nan
AC006129.2	RP11-153K11.3	LINC02640	RP11-153K11.3-001	10	70003286	70003442	108.05	0.471	0.036	0.079	0	4	.,.,.,.	0.01	0.08	0.05	0.75	-0.35	0.44
AC006129.2	RP11-162G10.5,ZNF248	ZNF248-AS1,ZNF248	RP11-162G10.5-001,ZNF248-001,ZNF248-002,ZNF248-004,ZNF248-005,ZNF248-006,ZNF248-201	10	38146561	38146664	71.4	0.032	0	0.01	0	1	rs114378760	0.03	0.03	0.03	#-nan	#-nan	-0.64
AC006129.2	RP11-162G10.5,ZNF248	ZNF248-AS1,ZNF248	RP11-162G10.5-001,ZNF248-001,ZNF248-002,ZNF248-004,ZNF248-005,ZNF248-006,ZNF248-201	10	38146305	38146399	65.1	0.032	0	0.01	0	1	rs141919551	0.01	0.01	0.01	#-nan	#-nan	-0.9
AC006129.2	RP11-162G10.5,ZNF248	ZNF248-AS1,ZNF248	RP11-162G10.5-001,ZNF248-001,ZNF248-002,ZNF248-004,ZNF248-005,ZNF248-006,ZNF248-201,ZNF248-202(*),ZNF248-203(*)	10	38146306	38146399	64.58	0.032	0	0.01	0	1	rs141919551	0.01	0.01	0.01	#-nan	#-nan	-0.9
AC006129.2	RP11-164C1.2	RP11-164C1.2	RP11-164C1.2-001	10	790424	790525	71.57	10	0.021	0.047	0.01	2	rs35342920,rs141733768	0.14	0.03	0.14	0.66	-0.96	-0.64
AC006129.2	RP11-168L22.2	LINC02633	RP11-168L22.2-001	10	43817724	43817823	68.88	0.037	0	0	0						#-nan	#-nan	#-nan
AC006129.2	RP11-181F12.1	RP11-181F12.1	RP11-181F12.1-001	10	86959329	86959435	75.6	0	0	0	0	1	rs142398470	0.13	0.13	0.13	#-nan	#-nan	-0.26
AC006129.2	RP11-182L21.6,RP11-773D16.1	RP11-182L21.6,RP11-773D16.1	RP11-182L21.6-001,RP11-773D16.1-001,RP11-773D16.1-002,RP11-773D16.1-003,RP11-773D16.1-004,RP11-773D16.1-005,RP11-773D16.1-006	10	81585691	81585796	74.98	0.02	0.01	0	0						#-nan	#-nan	#-nan
AC006129.2	RP11-182L21.6,RP11-773D16.1	RP11-182L21.6,RP11-773D16.1	RP11-182L21.6-001,RP11-773D16.1-001,RP11-773D16.1-002,RP11-773D16.1-003,RP11-773D16.1-004,RP11-773D16.1-005,RP11-773D16.1-006	10	81585423	81585570	106.27	0.02	0.01	0	0						#-nan	#-nan	#-nan
AC006129.2	RP11-182L21.6,RP11-773D16.1	RP11-182L21.6,RP11-773D16.1	RP11-182L21.6-001,RP11-773D16.1-001,RP11-773D16.1-002,RP11-773D16.1-003,RP11-773D16.1-004,RP11-773D16.1-005,RP11-773D16.1-006	10	81586511	81586674	119.14	0.02	0.01	0	0						#-nan	#-nan	#-nan
AC006129.2	RP11-182L21.6,RP11-773D16.1,NUTM2B-AS1	RP11-182L21.6,RP11-773D16.1,NUTM2B-AS1	RP11-182L21.6-001,RP11-773D16.1-001,RP11-773D16.1-002,RP11-773D16.1-003,RP11-773D16.1-004,RP11-773D16.1-005,RP11-773D16.1-006,NUTM2B-AS1-001(*),NUTM2B-AS1-013(*)	10	81585422	81585566	104.11	0.02	0.01	0	0						#-nan	#-nan	#-nan
AC006129.2	RP11-18I14.10	RP11-18I14.10	RP11-18I14.10-001,RP11-18I14.10-002,RP11-18I14.10-004,RP11-18I14.10-005,RP11-18I14.10-006,RP11-18I14.10-007,RP11-18I14.10-008	10	104209345	104209439	63.24	0	0	0	0	1	.	0.08	0.05	0.04	1.09	1.65	-0.97
AC006129.2	RP11-190J1.3	LINC03046	RP11-190J1.3-001	10	103471435	103471525	60.79	0	0	0.023	0	1	rs189492956	0.01	0.01	0.01	#-nan	#-nan	-0.83
AC006129.2	RP11-20J15.3	RP11-20J15.3	RP11-20J15.3-001,RP11-20J15.3-002(*)	10	44791127	44791218	63	0.012	0	0.012	0	1	rs73286700	0.09	0.09	0.09	#-nan	#-nan	-0.03
AC006129.2	RP11-20J15.3,RP11-20J15.5	RP11-20J15.3,LINC02881	RP11-20J15.3-001,RP11-20J15.5-001(*),RP11-20J15.5-002(*),RP11-20J15.5-201(*)	10	44788298	44788413	80.64	0.012	0	0.012	0						#-nan	#-nan	#-nan
AC006129.2	RP11-225H22.7	RP11-225H22.7	RP11-225H22.7-001	10	105207858	105207952	63.24	0.096	0	0	0						#-nan	#-nan	#-nan
AC006129.2	RP11-248J23.7	RP11-248J23.7	RP11-248J23.7-001	10	97617890	97617986	65.83	0.011	0.011	0.011	0.011	1	rs7077566	0.01	0.25	0.15	1.93	1.1	1.8
AC006129.2	RP11-282I1.1	LINC02641	RP11-282I1.1-002	10	125208791	125208888	68.16	0.023	0	0.022	0	2	rs112655710,rs142355734	0	0	0	#-nan	-0.96	-0.97
AC006129.2	RP11-282I1.2	RP11-282I1.2	RP11-282I1.2-001	10	125332070	125332231	114.17	0.513	0.026	0.013	0						#-nan	#-nan	#-nan
AC006129.2	RP11-288A5.2	RP11-288A5.2	RP11-288A5.2-001(*)	10	129538125	129538413	202.02	0	0	0	0	2	.,rs191265791	0.01	0.06	0.05	-0.76	#-nan	#-nan
AC006129.2	RP11-291L22.4	RP11-291L22.4	RP11-291L22.4-002,RP11-291L22.4-201(*)	10	38739611	38739756	97.28	0	0.007	0.039	0	5	rs144837921,rs11011564,rs2804651,rs2804650,rs141676098	0	0.04	0.03	2.56	2.22	1.56
AC006129.2	RP11-295P9.3	RP11-295P9.3	RP11-295P9.3-007	10	13652244	13652344	71.28	0.01	0	0.021	0						#-nan	#-nan	#-nan
AC006129.2	RP11-298E9.5	RP11-298E9.5	RP11-298E9.5-001	10	3267273	3267423	104.58	0	0	0.007	0	1	rs35421898	0.02	0.11	0.06	-0.01	-0.65	0.73
AC006129.2	RP11-298J20.4	RP11-298J20.4	RP11-298J20.4-001	10	126605558	126605936	271.73	0.005	0.005	0	0						#-nan	#-nan	#-nan
AC006129.2	RP11-309N24.1	LINC02630	RP11-309N24.1-001	10	36189888	36189977	62.16	0	0	0	0						#-nan	#-nan	#-nan
AC006129.2	RP11-323P17.2	LINC02930	RP11-323P17.2-001(*),RP11-323P17.2-002(*)	10	122577200	122577291	63.9	0	0	0	0						#-nan	#-nan	#-nan
AC006129.2	RP11-336A10.5	RP11-336A10.5	RP11-336A10.5-001	10	5652464	5652660	135.38	0.09	0.053	0.067	0	8	.,.,.,rs148448550,rs116941049,rs61832677,.,.	0.02	0.07	0.04	0.88	0.92	2.45
AC006129.2	RP11-348J12.2	CYP26C1-DT	RP11-348J12.2-001	10	94822819	94822930	80.35	0.02	0.009	0.009	0.009	1	rs12263200	0.07	0.26	0.15	0.26	-0.9	1.36
AC006129.2	RP11-351M16.3	LINC02652	RP11-351M16.3-001	10	28784181	28784310	94.61	0.017	0.016	0.085	0.016	4	rs74127246,rs7919199,rs74127245,rs151070965	0.07	0.06	0.07	1.51	0.15	0.98
AC006129.2	RP11-35J23.1	RP11-35J23.1	RP11-35J23.1-001	10	98067063	98067156	64.68	0.027	0	0	0						#-nan	#-nan	#-nan
AC006129.2	RP11-379F12.4	RP11-379F12.4	RP11-379F12.4-001	10	8090187	8090275	61.74	0.012	0	0	0						#-nan	#-nan	#-nan
AC006129.2	RP11-383C5.3	RP11-383C5.3	RP11-383C5.3-004,RP11-383C5.3-006(*),RP11-383C5.3-007(*),RP11-383C5.3-008(*),RP11-383C5.3-009(*),RP11-383C5.3-010(*)	10	127386130	127386294	111.38	10	0	0	0	5	rs74743572,.,rs565642294;rs199785005,rs187362104,rs193282909	0.03	0.09	0.08	-1.01	0.67	-0.91
AC006129.2	RP11-390B4.5,STAM	RP11-390B4.5,STAM	RP11-390B4.5-001,STAM-001,STAM-002,STAM-003,STAM-201	10	17686162	17686250	62.62	0.012	0.021	0.021	0	1	rs45579031	0.07	0.01	0.04	-0.25	-0.77	#-nan
AC006129.2	RP11-390B4.5,STAM,STAM-AS1	RP11-390B4.5,STAM,STAM-DT	RP11-390B4.5-001,STAM-001,STAM-002,STAM-003,STAM-201,STAM-AS1-001(*)	10	17686163	17686253	64.33	0.012	0.021	0.021	0	1	rs45579031	0.07	0.01	0.04	-0.25	-0.77	#-nan
AC006129.2	RP11-393J16.4,ZNF25	ZNF25-DT,ZNF25	RP11-393J16.4-001,ZNF25-001,ZNF25-002,ZNF25-003	10	38265455	38265541	61.78	0	0	0.025	0	2	rs144205159,rs139580770	0.01	0.03	0.02	-1.08	-0.6	-0.97
AC006129.2	RP11-393J16.4,ZNF25	ZNF25-DT,ZNF25	RP11-393J16.4-001,ZNF25-001,ZNF25-002,ZNF25-003	10	38265459	38265556	69.98	0	0	0.025	0	1	rs144205159	0.01	0	0.02	-0.7	#-nan	-0.97
AC006129.2	RP11-398B16.2	RP11-398B16.2	RP11-398B16.2-001	10	1405502	1405589	63.07	0.025	0	0	0						#-nan	#-nan	#-nan
AC006129.2	RP11-398C13.6,SUV39H2	SUV39H2-DT,SUV39H2	RP11-398C13.6-001,SUV39H2-001,SUV39H2-002,SUV39H2-003,SUV39H2-004,SUV39H2-005,SUV39H2-006,SUV39H2-007,SUV39H2-008	10	14920627	14920736	79.72	0.053	0	0.02	0	3	rs200159062,rs75497017,rs151268820	0.08	0.07	0.09	#-nan	#-nan	-0.75
AC006129.2	RP11-399K21.10	RP11-399K21.10	RP11-399K21.10-001	10	77191182	77191279	66.24	0.022	0	0	0						#-nan	#-nan	#-nan
AC006129.2	RP11-399K21.10,C10orf11	RP11-399K21.10,LRMDA	RP11-399K21.10-001,C10orf11-006(*)	10	77191435	77191549	83.66	0.022	0	0	0	1	rs55922628	0.27	0.18	0.16	1.76	1.94	1.09
AC006129.2	RP11-425A6.5	RP11-425A6.5	RP11-425A6.5-001	10	35897095	35897227	91.98	0.044	0	0.067	0	3	rs75803523,rs199590260,rs201736651	0.02	0.02	0.03	#-nan	#-nan	#-nan
AC006129.2	RP11-432J24.2	RP11-432J24.2	RP11-432J24.2-001	10	134229882	134229989	72.62	0.031	0	0.041	0	2	rs149320957,rs138673281	0.02	0.03	0.02	#-nan	#-nan	-1.03
AC006129.2	RP11-432J24.3	LINC03068	RP11-432J24.3-001	10	134253910	134254245	231.01	0	0.019	0.036	0	12	.,.,.,.,rs183500480,rs61865606,.,.,rs61865607,.,rs61865605,rs56043754	0.05	0.03	0.06	1.31	-0.35	-0.12
AC006129.2	RP11-432J9.6	LINC02622	RP11-432J9.6-001,RP11-432J9.6-002	10	72696467	72696566	68.88	0.034	0	0.021	0	2	rs150828276,rs183474100	0.05	0.04	0.04	#-nan	-0.96	#-nan
AC006129.2	RP11-445N18.7	RP11-445N18.7	RP11-445N18.7-001	10	45640689	45640836	104.8	0.007	0.046	0.038	0	2	.,rs185147192	0.04	0.03	0.02	0.31	1.22	2.24
AC006129.2	RP11-457D2.3	RP11-457D2.3	RP11-457D2.3-001	10	18156012	18156297	201.92	0.023	0.004	0	0	1	.	0.25	0.32	0.18	0.35	1.77	-0.86
AC006129.2	RP11-45A17.3	RP11-45A17.3	RP11-45A17.3-001(*)	10	133809807	133809899	63.34	0	0	0	0						#-nan	#-nan	#-nan
AC006129.2	RP11-463P17.3,ZNF488	RP11-463P17.3,ZNF488	RP11-463P17.3-001,ZNF488-002,ZNF488-003,ZNF488-004,ZNF488-005,ZNF488-006,ZNF488-201	10	48354621	48354807	131.63	0	0	0.011	0	1	rs4922490	0.01	0.1	0.11	1.54	1.72	1.86
AC006129.2	RP11-464C19.3	LINC02660	RP11-464C19.3-001	10	3974688	3974782	64.17	0.027	0.011	0.011	0	1	rs185630530	0.1	0.08	0.08	#-nan	-0.9	0.08
AC006129.2	RP11-472G21.2	RP11-472G21.2	RP11-472G21.2-001	10	73635475	73635680	142.8	0.031	0.005	0.005	0						#-nan	#-nan	#-nan
AC006129.2	RP11-472N13.2	RP11-472N13.2	RP11-472N13.2-001	10	31892310	31892395	62.2	0	0.012	0.025	0.012	2	rs77615776,rs111660719	0.03	0.03	0.03	#-nan	-0.71	-0.57
AC006129.2	RP11-47A8.5,TRIM8	TRIM8-DT,TRIM8	RP11-47A8.5-001,TRIM8-001,TRIM8-003	10	104403116	104403215	70.72	0.014	0.01	0.022	0.01						#-nan	#-nan	#-nan
AC006129.2	RP11-482E14.2	RP11-482E14.2	RP11-482E14.2-001,RP11-482E14.2-002	10	3580350	3580486	94.5	0.015	0.007	0.024	0.007	1	rs10795054	0.18	0.1	0.09	1.94	1.9	0.94
AC006129.2	RP11-499P20.2	CACNB2-AS1	RP11-499P20.2-001,RP11-499P20.2-002	10	18835790	18835887	67.2	0.071	0	0	0						#-nan	#-nan	#-nan
AC006129.2	RP11-501J20.5,SLC18A2	SLC18A2-AS1,SLC18A2	RP11-501J20.5-001,SLC18A2-001,SLC18A2-002	10	119000471	119000613	102.38	0.007	0.021	0.021	0	4	rs60543597,rs2619095,rs12412905,rs60912143	0.21	0.29	0.26	0.69	0.99	0.85
AC006129.2	RP11-50E11.3,SGMS1	RP11-50E11.3,SGMS1	RP11-50E11.3-001,RP11-50E11.3-002,SGMS1-003,SGMS1-006,SGMS1-007,SGMS1-202	10	52383732	52383840	77.33	0.028	0	0	0						#-nan	#-nan	#-nan
AC006129.2	RP11-517P14.2,U3.46	LINC02916,U3.46	RP11-517P14.2-001,U3.46-201	10	43916055	43916148	65.6	0	0	0	0	1	rs66880569	0.38	0.28	0.25	-0.37	-0.54	1.42
AC006129.2	RP11-523O18.1,RP11-523O18.5	RP11-523O18.1,RP11-523O18.5	RP11-523O18.1-001,RP11-523O18.5-002(*)	10	50190082	50190174	63.34	0.038	0	0	0						#-nan	#-nan	#-nan
AC006129.2	RP11-526P5.1	RP11-526P5.1	RP11-526P5.1-001	10	2539416	2539506	63.47	0.151	0	0.037	0	3	rs9732971,rs11817614,rs188774637	0.34	0.06	0.38	1.48	-0.26	0.08
AC006129.2	RP11-526P5.2	RP11-526P5.2	RP11-526P5.2-001,RP11-526P5.2-002	10	2542973	2543180	143.24	0	0.005	0.005	0	3	.,rs79973342,rs111577188	0.02	0.07	0.04	0.26	-1.17	-0.32
AC006129.2	RP11-543F8.2	RP11-543F8.2	RP11-543F8.2-001	10	8441480	8441582	68.95	0.022	0	0.02	0	1	rs200315661	0.02	0.03	0.02	#-nan	#-nan	0.73
AC006129.2	RP11-563N6.6	RP11-563N6.6	RP11-563N6.6-001	10	50085786	50085873	61.34	0.024	0	0.074	0	1	rs75416314	#-nan	0.01	0.01	#-nan	-0.77	#-nan
AC006129.2	RP11-573G6.10	RP11-573G6.10	RP11-573G6.10-001	10	22629895	22630008	81.22	0.028	0.019	0.009	0.009	1	rs7083243	0.18	0.19	0.18	#-nan	#-nan	0.77
AC006129.2	RP11-573G6.4	RP11-573G6.4	RP11-573G6.4-001(*)	10	22541709	22541838	94.61	0	0	0	0	2	rs115713492,rs187296462	0.05	0.06	0.05	-0.97	#-nan	-0.38
AC006129.2	RP11-573G6.8	RP11-573G6.8	RP11-573G6.8-001	10	22625140	22625254	82.51	0.019	0	0.009	0	1	rs116021291	0.13	0.14	0.13	#-nan	#-nan	0.35
AC006129.2	RP11-57G10.8	RP11-57G10.8	RP11-57G10.8-001	10	69608981	69609116	95.42	0.225	0.023	0	0						#-nan	#-nan	#-nan
AC006129.2	RP11-77P6.2,WAPAL	WAPL-DT,WAPL	RP11-77P6.2-001,WAPAL-001,WAPAL-201(*),WAPAL-202(*)	10	88281050	88281187	94.39	0	0	0.007	0.008	1	rs183952997	0	0	0	#-nan	#-nan	-0.51
AC006129.2	RP11-79M19.2	GRK5-AS1	RP11-79M19.2-001	10	121094653	121094737	60.07	0.146	0	0.012	0	2	rs144302024,rs145374736	0.18	0.15	0.14	-1.92	-1.53	1.67
AC006129.2	RP11-809C18.4	RP11-809C18.4	RP11-809C18.4-001	10	714171	714351	126.42	0.006	0	0.011	0	1	rs117793933	0.02	#-nan	0.03	-0.7	#-nan	#-nan
AC006129.2	RP11-809C18.5	RP11-809C18.5	RP11-809C18.5-001	10	709877	710010	97.24	0.051	0	0.032	0	4	.,.,rs185203668,rs59381073	0.09	0.07	0.08	#-nan	-1.21	-0.61
AC006129.2	RP11-809M12.1,TMEM26	RP11-809M12.1,TMEM26	RP11-809M12.1-001,TMEM26-001,TMEM26-003,TMEM26-004,TMEM26-201	10	63212084	63212173	63.05	0.032	0.021	0.021	0	1	rs6479764	0.41	0.41	0.29	1.76	1.74	0.35
AC006129.2	RP11-85A1.3,SLC25A28	SLC25A28-DT,SLC25A28	RP11-85A1.3-001,SLC25A28-001,SLC25A28-004,SLC25A28-005,SLC25A28-006	10	101380042	101380162	85.63	0	0	0	0						#-nan	#-nan	#-nan
AC006129.2	RP11-85A1.3,SLC25A28	SLC25A28-DT,SLC25A28	RP11-85A1.3-001,SLC25A28-001,SLC25A28-004,SLC25A28-005,SLC25A28-006	10	101379990	101380149	114.91	0	0	0	0						#-nan	#-nan	#-nan
AC006129.2	RP11-95I16.2	RP11-95I16.2	RP11-95I16.2-001	10	122739261	122739363	73.87	0.011	0	0.01	0.01	2	rs11199687,rs149080157	0.09	0.01	0.05	0.16	-0.96	-0.64
AC006129.2	RP13-16H11.2	SELENOOLP	RP13-16H11.2-001	10	26964773	26964888	81.79	0.038	0.038	0.095	0	5	rs113996254,.,.,.,.	0.07	0.07	0.06	#-nan	#-nan	#-nan
AC006129.2	RP13-238F13.3,RP13-238F13.5	RP13-238F13.3,RP13-238F13.5	RP13-238F13.3-001,RP13-238F13.5-001,RP13-238F13.3-002(*)	10	126135864	126135964	69.3	0	0.08	0.01	0.045	1	rs139224458	0	0.03	0.02	-0.97	-0.6	#-nan
AC006129.2	RP13-463N16.6	LASTR	RP13-463N16.6-001	10	5640142	5640244	74.9	0.043	0	0.01	0	1	rs149508086	0.07	0.2	0.12	-0.9	-0.9	-0.97
AC006129.2	RP5-1119O21.2	RP5-1119O21.2	RP5-1119O21.2-001	10	8339189	8339373	128.1	0.108	0.017	0.011	0	2	rs75581235,rs191904950	0.1	0	0.08	0.1	-0.9	-0.97
AC006129.2	RPP30	RPP30	RPP30-001,RPP30-004,RPP30-005,RPP30-201	10	92628404	92628516	78.81	0.029	0	0.009	0	1	rs192387661	0.01	0.01	0.01	#-nan	#-nan	-0.83
AC006129.2	RPP30	RPP30	RPP30-001,RPP30-004,RPP30-005,RPP30-201	10	92628405	92628517	79.66	0.029	0	0.009	0	1	rs192387661	0.01	0.01	0.01	#-nan	#-nan	-0.83
AC006129.2	RPS24	RPS24	RPS24-001,RPS24-002,RPS24-003,RPS24-004,RPS24-005,RPS24-006,RPS24-007,RPS24-008,RPS24-009,RPS24-010,RPS24-201,RPS24-202	10	79793798	79793938	99.26	0	0.021	0.021	0	5	rs79606962,rs7071081,rs111260760,.,rs183273336	0.23	0.24	0.23	#-nan	-0.96	0.28
AC006129.2	RPS24	RPS24	RPS24-001,RPS24-002,RPS24-003,RPS24-004,RPS24-005,RPS24-006,RPS24-007,RPS24-008,RPS24-009,RPS24-010,RPS24-201,RPS24-202,RPS24-203(*)	10	79793797	79793933	95.34	0	0.021	0.021	0	5	rs79606962,rs7071081,rs111260760,.,rs183273336	0.23	0.24	0.23	#-nan	-0.96	0.28
AC006129.2	RRP12	RRP12	RRP12-004	10	99143820	99143952	90.17	0.033	0.033	0.043	0	3	.,rs114193021,.	0.06	0.07	0.05	1.05	0.93	0.88
AC006129.2	RSU1	RSU1	RSU1-001,RSU1-002,RSU1-003,RSU1-004,RSU1-201	10	16859136	16859286	105.42	0.007	0.022	0.022	0.014						#-nan	#-nan	#-nan
AC006129.2	RUFY2	RUFY2	RUFY2-001,RUFY2-007,RUFY2-009,RUFY2-010,RUFY2-201,RUFY2-202,RUFY2-203	10	70166879	70167129	182.65	0.017	0.008	0.022	0.013	6	rs143640573,rs59831114,rs7098448,rs115284499,rs138151791,rs192608421	0.07	0.07	0.05	-0.41	-0.03	-0.11
AC006129.2	RUFY2	RUFY2	RUFY2-001,RUFY2-007,RUFY2-009,RUFY2-010,RUFY2-201,RUFY2-202,RUFY2-203	10	70166882	70167130	180.89	0.017	0.008	0.022	0.013	6	rs143640573,rs59831114,rs7098448,rs115284499,rs138151791,rs192608421	0.07	0.07	0.05	-0.41	-0.03	-0.11
AC006129.2	SAR1A	SAR1A	SAR1A-003,SAR1A-004,SAR1A-006,SAR1A-201	10	71922116	71922261	103.68	0.032	0.021	0.021	0	2	rs181244323,rs75892750	0.02	0.06	0.03	0.89	1.35	-0.22
AC006129.2	SEC31B	SEC31B	SEC31B-001,SEC31B-003,SEC31B-004,SEC31B-009,SEC31B-010,SEC31B-013,SEC31B-201,SEC31B-202	10	102279514	102279622	79.28	0.018	0	0	0						#-nan	#-nan	#-nan
AC006129.2	SEC61A2	SEC61A2	SEC61A2-001,SEC61A2-002,SEC61A2-006,SEC61A2-007,SEC61A2-008,SEC61A2-009,SEC61A2-010,SEC61A2-011,SEC61A2-012,SEC61A2-201	10	12171887	12172026	97.98	0.015	0.007	0.015	0.007	2	rs118060991,rs180980583	0.09	0.04	0.05	-0.62	-0.48	#-nan
AC006129.2	SEMA4G	SEMA4G	SEMA4G-004,SEMA4G-012,SEMA4G-201(*)	10	102743574	102743673	70.72	0	0	0.021	0	1	rs145330425	#-nan	0	0	#-nan	-0.96	#-nan
AC006129.2	SFRP5	SFRP5	SFRP5-001	10	99532019	99532155	96.7	0.007	0.007	0.016	0.007	1	rs7081652	0.16	0.45	0.3	0.62	1.95	#-nan
AC006129.2	SFTPA1	SFTPA1	SFTPA1-007,SFTPA1-008,SFTPA1-009,SFTPA1-011,SFTPA1-201,SFTPA1-202,SFTPA1-203,SFTPA1-204	10	81368389	81368484	66.36	0.011	0.011	0.06	0.011	3	rs4253590,rs151043925,rs4253493	0.03	0.02	0.04	-0.44	#-nan	-1.03
AC006129.2	SFTPD	SFTPD	SFTPD-002	10	81741445	81741549	74.74	0.14	0	0.01	0						#-nan	#-nan	#-nan
AC006129.2	SFXN3	SFXN3	SFXN3-002,SFXN3-003,SFXN3-004,SFXN3-006	10	102796252	102796385	90.58	0.025	0	0.01	0						#-nan	#-nan	#-nan
AC006129.2	SFXN3	SFXN3	SFXN3-002,SFXN3-003,SFXN3-004,SFXN3-006	10	102795848	102795948	67.32	0.025	0	0.01	0	1	rs115940736	0.01	0.01	0.01	#-nan	#-nan	-0.9
AC006129.2	SFXN4	SFXN4	SFXN4-001,SFXN4-002,SFXN4-003,SFXN4-004,SFXN4-005,SFXN4-006,SFXN4-201	10	120925126	120925237	80.35	0	0	0.009	0	1	rs150682528	0.02	0.02	0.02	#-nan	#-nan	-0.7
AC006129.2	SGMS1	SGMS1	SGMS1-004	10	52177928	52178097	122.64	0.013	0	0	0						#-nan	#-nan	#-nan
AC006129.2	SGPL1	SGPL1	SGPL1-001,SGPL1-002	10	72575912	72576054	101.52	0	0	0.007	0						#-nan	#-nan	#-nan
AC006129.2	SGPL1	SGPL1	SGPL1-007(*)	10	72624413	72624507	65.1	0	0	0	0						#-nan	#-nan	#-nan
AC006129.2	SH3PXD2A	SH3PXD2A	SH3PXD2A-001,SH3PXD2A-201	10	105615249	105615387	99.79	0.015	0	0	0						#-nan	#-nan	#-nan
AC006129.2	SH3PXD2A	SH3PXD2A	SH3PXD2A-002,SH3PXD2A-202	10	105452872	105452960	63.51	0	0	0.012	0						#-nan	#-nan	#-nan
AC006129.2	SIRT1	SIRT1	SIRT1-001,SIRT1-004,SIRT1-005,SIRT1-201	10	69644625	69644755	95.05	0.014	0	0	0						#-nan	#-nan	#-nan
AC006129.2	SKIDA1	SKIDA1	SKIDA1-001	10	21816196	21816352	112.75	0.021	0	0.007	0						#-nan	#-nan	#-nan
AC006129.2	SKIDA1	SKIDA1	SKIDA1-001,SKIDA1-002	10	21815040	21815226	132.49	0.021	0	0.007	0						#-nan	#-nan	#-nan
AC006129.2	SLC16A12	SLC16A12	SLC16A12-001,SLC16A12-201	10	91295370	91295473	72.42	0.02	0	0.022	0	2	rs189781717,rs184932556	0.03	0	0.03	-0.67	#-nan	-1.31
AC006129.2	SLC16A9	SLC16A9	SLC16A9-001,SLC16A9-002	10	61469738	61469869	94.18	0	0	0.008	0	1	rs187741506	0.03	0.09	0.05	-0.63	0	#-nan
AC006129.2	SLC29A3	SLC29A3	SLC29A3-003	10	73112241	73112375	93.66	0.015	0.021	0.021	0	5	rs780670,rs77204252,rs144198037,rs79598297,rs780669	0.32	0.03	0.17	0.87	1.62	0.8
AC006129.2	SLC35G1	SLC35G1	SLC35G1-001,SLC35G1-002,SLC35G1-003,SLC35G1-004,SLC35G1-005,SLC35G1-201	10	95653954	95654056	71.99	0.01	0	0	0						#-nan	#-nan	#-nan
AC006129.2	SLIT1	SLIT1	SLIT1-001,SLIT1-003,SLIT1-004,SLIT1-006,SLIT1-009	10	98945756	98945871	78.66	0.03	0	0.011	0	2	rs2817669,.	0.05	0.05	0.04	1.2	1.26	-0.57
AC006129.2	SLIT1	SLIT1	SLIT1-001,SLIT1-003,SLIT1-004,SLIT1-006,SLIT1-009	10	98947434	98947532	67.48	0.03	0	0.011	0	1	rs140299569	0.01	0.01	0.01	#-nan	#-nan	-0.9
AC006129.2	SLK	SLK	SLK-001,SLK-002	10	105727042	105727134	65.18	0.011	0.011	0	0						#-nan	#-nan	#-nan
AC006129.2	SMNDC1	SMNDC1	SMNDC1-001,SMNDC1-002,SMNDC1-003,SMNDC1-004,SMNDC1-005	10	112064580	112064704	85.7	0.017	0.008	0.046	0.008	4	rs11195071,rs76449548,rs149218859,rs111704955	0.01	0.03	0.02	-0.97	-0.48	-1.39
AC006129.2	SMNDC1	SMNDC1	SMNDC1-001,SMNDC1-002,SMNDC1-003,SMNDC1-004,SMNDC1-005	10	112064221	112064339	83.92	0.017	0.008	0.046	0.008	1	rs111868614	0.03	0	0.01	#-nan	-0.83	-0.64
AC006129.2	SNORA14.1	SNORA14.1	SNORA14.1-201	10	6060832	6060955	86.52	0.009	0	0.008	0						#-nan	#-nan	#-nan
AC006129.2	SNORD45.5	SNORD45.5	SNORD45.5-201	10	12454595	12454692	69.01	0	0	0	0	2	rs3109813,rs140544757	0.07	0.08	0.07	-0.9	#-nan	-0.14
AC006129.2	SORBS1	SORBS1	SORBS1-001,SORBS1-002,SORBS1-014,SORBS1-015,SORBS1-017,SORBS1-201,SORBS1-202,SORBS1-203,SORBS1-204,SORBS1-205	10	97321025	97321148	88.99	0.032	0.021	0.021	0	1	rs150571045	0	0	0	-0.25	-0.31	-0.32
AC006129.2	SORCS1	SORCS1	SORCS1-001,SORCS1-201	10	108924441	108924591	107.57	0.037	0.082	0.082	0						#-nan	#-nan	#-nan
AC006129.2	SORCS1	SORCS1	SORCS1-003	10	108365987	108366083	66.65	0.047	0.024	0.022	0						#-nan	#-nan	#-nan
AC006129.2	SORCS1	SORCS1	SORCS1-004	10	108372057	108372216	112.46	0.086	0.006	0.027	0.006	4	rs10884336,rs145189559,rs182402653,rs117493133	0.22	0.43	0.28	-0.63	-0.92	1.95
AC006129.2	SORCS3	SORCS3	SORCS3-001,SORCS3-201(*)	10	106399084	106399234	106.93	0	0	0.014	0						#-nan	#-nan	#-nan
AC006129.2	SORCS3-AS1	SORCS3-AS1	SORCS3-AS1-001	10	106427064	106427151	61.34	0.012	0	0.012	0	2	rs140813914,rs182989228	0.14	0	0.13	0.57	-1.29	-0.97
AC006129.2	SPAG6	SPAG6	SPAG6-004,SPAG6-005,SPAG6-006,SPAG6-007,SPAG6-008,SPAG6-201,SPAG6-202,SPAG6-203	10	22635386	22635479	64.58	0.036	0.021	0.021	0	2	.,rs186055849	0	0	0	-0.9	-0.96	-0.9
AC006129.2	SPAG6	SPAG6	SPAG6-004,SPAG6-005,SPAG6-006,SPAG6-007,SPAG6-008,SPAG6-201,SPAG6-202,SPAG6-203	10	22634739	22634832	64.68	0.036	0.021	0.021	0						#-nan	#-nan	#-nan
AC006129.2	SPOCK2	SPOCK2	SPOCK2-003,SPOCK2-004,SPOCK2-005,SPOCK2-201,SPOCK2-202,SPOCK2-203	10	73847373	73847475	72.85	0.016	0.012	0.037	0.012						#-nan	#-nan	#-nan
AC006129.2	SPRN	SPRN	SPRN-001	10	135238113	135238305	130.97	0	0	0	0						#-nan	#-nan	#-nan
AC006129.2	SPRN,SYCE1	SPRN,SYCE1	SPRN-201,SYCE1-001,SYCE1-202	10	135382982	135383119	91.66	0	0	0	0						#-nan	#-nan	#-nan
AC006129.2	SRGN	SRGN	SRGN-001,SRGN-002	10	70846035	70846134	70.72	0.121	0	0.066	0	1	rs116700141	0.04	0.04	0.04	#-nan	#-nan	-0.51
AC006129.2	ST8SIA6	ST8SIA6	ST8SIA6-001	10	17496130	17496300	122.26	0	0	0.006	0	1	rs140398395	0.02	0.11	0.06	-0.56	#-nan	0.08
AC006129.2	STAMBPL1	STAMBPL1	STAMBPL1-001,STAMBPL1-002,STAMBPL1-005,STAMBPL1-006	10	90640688	90640794	73.5	0	0	0	0						#-nan	#-nan	#-nan
AC006129.2	STK32C	STK32C	STK32C-001,STK32C-002	10	134121629	134121734	70.99	0.02	0.02	0.031	0.02	3	rs12268135,rs190583653,rs147222310	0	0.25	0.15	-0.21	-0.96	1.24
AC006129.2	STK32C	STK32C	STK32C-004	10	134063833	134064016	122.21	0	0	0	0						#-nan	#-nan	#-nan
AC006129.2	SVIL	SVIL	SVIL-001,SVIL-002,SVIL-201	10	30024864	30024956	66.1	0.013	0	0.013	0	1	rs187042333	0.03	0.04	0.04	#-nan	#-nan	-0.57
AC006129.2	SVIL	SVIL	SVIL-008	10	29798197	29798282	60.49	0.124	0.025	0.038	0	2	.,.	0.04	0.08	0.04	-0.11	0.52	-1.1
AC006129.2	SYCE1	SYCE1	SYCE1-001,SYCE1-002,SYCE1-004,SYCE1-201	10	135380445	135380569	86.1	0.152	0	0.08	0.017	8	rs2987799,rs114993466,rs114295786,rs191884048,rs34890953,.,rs184193375,rs77237195	0.31	0.17	0.18	0.26	-0.96	-0.38
AC006129.2	SYCE1	SYCE1	SYCE1-002,SYCE1-004,SYCE1-201	10	135378870	135378999	88.13	0.152	0	0.08	0.017						#-nan	#-nan	#-nan
AC006129.2	SYT15	SYT15B	SYT15-001,SYT15-002,SYT15-003,SYT15-004,SYT15-005,SYT15-201	10	46970589	46970727	100.3	0.016	0.021	0.021	0						#-nan	#-nan	#-nan
AC006129.2	SYT15	SYT15B	SYT15-001,SYT15-002,SYT15-003,SYT15-004,SYT15-005,SYT15-201	10	46970756	46970880	86.1	0.016	0.021	0.021	0	4	rs114754034,rs137949701,.,rs183687267	0.01	0.06	0.03	#-nan	#-nan	-1.26
AC006129.2	TACR2	TACR2	TACR2-001,TACR2-201(*)	10	71176636	71176739	73.27	0	0	0	0	5	rs5030928,rs10762295,rs10998766,rs143572789,rs117799232	0.27	0.49	0.34	0.75	-1.16	1.43
AC006129.2	TAF5	TAF5	TAF5-001,TAF5-201	10	105127755	105127857	75.92	0.01	0	0	0						#-nan	#-nan	#-nan
AC006129.2	TBC1D12	TBC1D12	TBC1D12-001	10	96162991	96163087	69.55	0.011	0.011	0.011	0.011	1	rs2477534	0	0.08	0.04	1.63	0.89	1.8
AC006129.2	TBC1D12	TBC1D12	TBC1D12-004	10	96291449	96291626	118.19	0.032	0.021	0.021	0	5	rs12257684,rs191388112,rs190521100,.,.	0	0.04	0.02	0.19	-0.26	-0.39
AC006129.2	TCERG1L	TCERG1L	TCERG1L-002	10	133109765	133109917	110.81	0	0	0	0						#-nan	#-nan	#-nan
AC006129.2	TCERG1L-AS1	TCERG1L-AS1	TCERG1L-AS1-001	10	132893419	132893515	70.6	10	0.035	0.011	0	1	rs10159796	0	0.08	0.04	0.04	-0.96	-0.03
AC006129.2	TET1	TET1	TET1-001	10	70320577	70320667	64.33	0.04	0	0	0						#-nan	#-nan	#-nan
AC006129.2	TIAL1	TIAL1	TIAL1-005,TIAL1-006,TIAL1-007,TIAL1-008,TIAL1-009,TIAL1-010,TIAL1-011,TIAL1-201	10	121356076	121356184	80.36	0.01	0.021	0.021	0						#-nan	#-nan	#-nan
AC006129.2	TIAL1	TIAL1	TIAL1-005,TIAL1-006,TIAL1-007,TIAL1-008,TIAL1-009,TIAL1-010,TIAL1-011,TIAL1-201	10	121355848	121355963	80.64	0.01	0.021	0.021	0	1	rs199547530	0	#-nan	0	1.01	#-nan	#-nan
AC006129.2	TIAL1	TIAL1	TIAL1-005,TIAL1-006,TIAL1-007,TIAL1-008,TIAL1-009,TIAL1-010,TIAL1-011,TIAL1-201	10	121355841	121355938	66.24	0.01	0.021	0.021	0	1	rs199547530	0	#-nan	0	1.01	#-nan	#-nan
AC006129.2	TIAL1	TIAL1	TIAL1-012,TIAL1-013	10	121350219	121350315	67.62	0	0.035	0.205	0	9	.,.,rs138794298,.,.,rs184983534,rs199952246,.,.	0.03	0.05	0.03	-0.97	-0.77	-1.01
AC006129.2	TLL2	TLL2	TLL2-001,TLL2-002	10	98273666	98273772	74.55	0.031	0.01	0.01	0.01	1	rs1408365	0.03	0.03	0.03	#-nan	#-nan	-0.64
AC006129.2	TLX1,TLX1NB	TLX1,TLX1NB	TLX1-004,TLX1-005,TLX1NB-001,TLX1NB-002	10	102893405	102893520	78.34	0	0	0.009	0	1	rs182130442	0	0	0	#-nan	#-nan	-0.97
AC006129.2	TM9SF3	TM9SF3	TM9SF3-001,TM9SF3-003,TM9SF3-004	10	98346506	98346656	107.57	0.016	0	0.007	0.007	2	rs199747093,rs1062176	0.04	0.12	0.06	-0.76	-0.96	-0.51
AC006129.2	TMEM180	MFSD13A	TMEM180-003	10	104230472	104230562	62.58	0	0	0.036	0	1	rs75912940	0.02	0.03	0.02	#-nan	#-nan	-0.7
AC006129.2	TNKS2,TNKS2-AS1	TNKS2,TNKS2-DT	TNKS2-001,TNKS2-AS1-001,TNKS2-AS1-002	10	93558210	93558312	74.02	0.01	0	0.02	0						#-nan	#-nan	#-nan
AC006129.2	TNKS2,TNKS2-AS1	TNKS2,TNKS2-DT	TNKS2-001,TNKS2-AS1-001,TNKS2-AS1-002	10	93558134	93558293	112.46	0.01	0	0.02	0	1	rs148775233	0.01	0	0	#-nan	#-nan	#-nan
AC006129.2	TRDMT1	TRDMT1	TRDMT1-001,TRDMT1-002,TRDMT1-005,TRDMT1-006,TRDMT1-007,TRDMT1-008,TRDMT1-010,TRDMT1-011,TRDMT1-012,TRDMT1-201,TRDMT1-202,TRDMT1-203,TRDMT1-204,TRDMT1-205	10	17243615	17243734	85.54	0	0.021	0.021	0	2	rs11254458,rs182058526	0.02	0.06	0.04	-0.76	-0.15	-0.83
AC006129.2	TRDMT1	TRDMT1	TRDMT1-001,TRDMT1-002,TRDMT1-005,TRDMT1-006,TRDMT1-007,TRDMT1-008,TRDMT1-010,TRDMT1-011,TRDMT1-012,TRDMT1-201,TRDMT1-202,TRDMT1-203,TRDMT1-204,TRDMT1-205	10	17243614	17243699	61.34	0	0.021	0.021	0	2	rs11254458,rs182058526	0.02	0.06	0.04	-0.76	-0.15	-0.83
AC006129.2	TRDMT1	TRDMT1	TRDMT1-001,TRDMT1-002,TRDMT1-005,TRDMT1-006,TRDMT1-007,TRDMT1-008,TRDMT1-010,TRDMT1-011,TRDMT1-012,TRDMT1-201,TRDMT1-202,TRDMT1-203,TRDMT1-204,TRDMT1-205	10	17243618	17243748	92.88	0	0.021	0.021	0	2	rs11254458,rs182058526	0.02	0.06	0.04	-0.76	-0.15	-0.83
AC006129.2	TSPAN14	TSPAN14	TSPAN14-001,TSPAN14-002,TSPAN14-003,TSPAN14-007,TSPAN14-008,TSPAN14-009,TSPAN14-010	10	82213720	82213890	120.56	0.018	0	0	0						#-nan	#-nan	#-nan
AC006129.2	TSPAN14	TSPAN14	TSPAN14-001,TSPAN14-002,TSPAN14-003,TSPAN14-007,TSPAN14-008,TSPAN14-009,TSPAN14-010	10	82213715	82213872	112.32	0.018	0	0	0						#-nan	#-nan	#-nan
AC006129.2	TTC40	TTC40	TTC40-001,TTC40-008,TTC40-009,TTC40-202	10	134755835	134755959	86.94	0	0	0	0	3	rs56100128,rs141093874,rs79578296	0.02	0.05	0.03	1.59	2.43	1.72
AC006129.2	TTC40	TTC40	TTC40-002,TTC40-007	10	134650943	134651351	281.93	0	0	0	0	7	rs200230647,.,rs201327070,rs201116941,rs188171081,rs200206713,rs115423550	0.2	0.19	0.17	-0.83	-0.83	-0.77
AC006129.2	TTC40	TTC40	TTC40-004	10	134693619	134693710	62.02	0	0	0	0						#-nan	#-nan	#-nan
AC006129.2	TTC40	TTC40	TTC40-005	10	134725673	134725916	176.95	0	0	0	0	4	.,.,rs184259736,rs142921855	0.12	0.34	0.2	#-nan	#-nan	-0.9
AC006129.2	TUBGCP2	TUBGCP2	TUBGCP2-002	10	135126916	135127010	63.24	0.011	0	0	0						#-nan	#-nan	#-nan
AC006129.2	TUBGCP2	TUBGCP2	TUBGCP2-004	10	135094257	135094430	119.23	0	0.006	0.012	0	2	rs74164135,rs111715984	0.09	0.15	0.11	-1.03	#-nan	0.67
AC006129.2	TUBGCP2,ZNF511	TUBGCP2,ZNF511	TUBGCP2-006,TUBGCP2-007,TUBGCP2-008,TUBGCP2-201,TUBGCP2-202,ZNF511-001,ZNF511-002,ZNF511-003,ZNF511-004,ZNF511-201	10	135122685	135122799	75.64	0.018	0.059	0	0.044	1	rs146063105	0.14	0.26	0.17	-0.83	-0.96	-0.97
AC006129.2	TUBGCP2,ZNF511	TUBGCP2,ZNF511	TUBGCP2-006,TUBGCP2-007,TUBGCP2-008,TUBGCP2-201,TUBGCP2-202,ZNF511-001,ZNF511-002,ZNF511-003,ZNF511-004,ZNF511-201,TUBGCP2-203(*)	10	135122698	135122803	70.8	0.018	0.059	0	0.044	1	rs146063105	0.14	0.26	0.17	-0.7	-0.96	-0.97
AC006129.2	TYSND1	TYSND1	TYSND1-001,TYSND1-002,TYSND1-003,TYSND1-004	10	71905338	71905428	64.37	0.053	0	0	0						#-nan	#-nan	#-nan
AC006129.2	U3.13	U3.13	U3.13-201	10	19885675	19885808	94.57	0	0	0	0	3	rs201071195,rs117142055,rs149063287	0.08	0.03	0.04	#-nan	-0.43	-0.9
AC006129.2	U3.53	U3.53	U3.53-201	10	28697364	28697705	245.38	0	0	0	0	6	rs55926912,rs200287836,rs187880670,rs191453333,rs112003185,rs139225060	0.01	0.01	0.01	-0.76	-0.65	-1.55
AC006129.2	UBE2D1	UBE2D1	UBE2D1-001,UBE2D1-201(*)	10	60094766	60094919	106.68	0	0.007	0.007	0.007	1	rs189248561	0.02	0.03	0.02	#-nan	#-nan	-0.7
AC006129.2	UPF2	UPF2	UPF2-001	10	12077131	12077312	126	0.006	0	0.018	0						#-nan	#-nan	#-nan
AC006129.2	UPF2	UPF2	UPF2-002,UPF2-004,UPF2-201	10	12084826	12084932	76.46	0	0	0	0						#-nan	#-nan	#-nan
AC006129.2	USP54	USP54	USP54-202(*)	10	75288320	75288411	65.7	0	0	0	0	1	rs191900311	0	0	0	#-nan	#-nan	-0.97
AC006129.2	VAX1	VAX1	VAX1-001,VAX1-002	10	118897590	118897693	71.4	0.048	0.058	0.032	0						#-nan	#-nan	#-nan
AC006129.2	VAX1	VAX1	VAX1-001,VAX1-002	10	118899308	118899409	70.56	0.048	0.058	0.032	0						#-nan	#-nan	#-nan
AC006129.2	VDAC2	VDAC2	VDAC2-001,VDAC2-002,VDAC2-003,VDAC2-005,VDAC2-006,VDAC2-007,VDAC2-008,VDAC2-009,VDAC2-010,VDAC2-011,VDAC2-012,VDAC2-013,VDAC2-201,VDAC2-202	10	76970829	76970919	64.37	0.024	0.021	0.021	0	2	rs77230810,rs188779832	0.11	0.13	0.1	-0.95	-0.97	1.09
AC006129.2	VENTX	VENTX	VENTX-001	10	135048168	135048307	95.22	0.03	0	0	0						#-nan	#-nan	#-nan
AC006129.2	VIM,VIM-AS1	VIM,VIM-AS1	VIM-001,VIM-002,VIM-003,VIM-004,VIM-005,VIM-006,VIM-007,VIM-008,VIM-201,VIM-AS1-001,VIM-AS1-002	10	17271070	17271194	86.94	0	0	0.018	0	2	rs3758411,.	0.2	0.19	0.12	0.35	0.77	-0.64
AC006129.2	VIM,VIM-AS1	VIM,VIM-AS1	VIM-001,VIM-002,VIM-003,VIM-004,VIM-005,VIM-006,VIM-007,VIM-008,VIM-201,VIM-AS1-001,VIM-AS1-002	10	17271065	17271193	90.74	0	0	0.018	0	2	rs3758411,.	0.2	0.19	0.12	0.35	0.77	-0.64
AC006129.2	VPS26A	VPS26A	VPS26A-001,VPS26A-004,VPS26A-006,VPS26A-007,VPS26A-008,VPS26A-201,VPS26A-202,VPS26A-203,VPS26A-204	10	70884239	70884375	99.9	0.008	0	0.016	0	1	rs10998588	0.17	0.18	0.18	#-nan	#-nan	0.73
AC006129.2	VSTM4	VSTM4	VSTM4-001,VSTM4-002	10	50323392	50323631	171.94	0.04	0	0	0						#-nan	#-nan	#-nan
AC006129.2	VWA2	VWA2	VWA2-001,VWA2-002,VWA2-201	10	115999239	115999329	66.16	0.032	0.021	0.021	0	2	rs73363358,rs111868104	0	0.2	0.1	0.77	#-nan	1.1
AC006129.2	WAC,WAC-AS1	WAC,WAC-AS1	WAC-001,WAC-003,WAC-004,WAC-005,WAC-006,WAC-009,WAC-010,WAC-012,WAC-016,WAC-017,WAC-018,WAC-021,WAC-022,WAC-023,WAC-024,WAC-201,WAC-AS1-001,WAC-AS1-002	10	28821608	28821698	66.14	0.039	0.01	0.021	0.01	1	rs149864425	0.06	0.07	0.06	#-nan	#-nan	-0.26
AC006129.2	WAC,WAC-AS1	WAC,WAC-AS1	WAC-001,WAC-003,WAC-004,WAC-005,WAC-006,WAC-009,WAC-010,WAC-012,WAC-016,WAC-017,WAC-018,WAC-021,WAC-022,WAC-023,WAC-024,WAC-201,WAC-AS1-001,WAC-AS1-002	10	28822760	28822879	85.54	0.039	0.01	0.021	0.01	1	rs182451824	0.04	#-nan	0.04	-0.5	#-nan	#-nan
AC006129.2	WAC,WAC-AS1	WAC,WAC-AS1	WAC-001,WAC-003,WAC-004,WAC-005,WAC-006,WAC-009,WAC-010,WAC-012,WAC-016,WAC-017,WAC-018,WAC-021,WAC-022,WAC-023,WAC-024,WAC-201,WAC-AS1-001,WAC-AS1-002	10	28821800	28821901	74.59	0.039	0.01	0.021	0.01	1	rs145704766	0.06	0.06	0.06	#-nan	#-nan	-0.32
AC006129.2	WAC,WAC-AS1	WAC,WAC-AS1	WAC-001,WAC-003,WAC-004,WAC-005,WAC-006,WAC-009,WAC-010,WAC-012,WAC-016,WAC-017,WAC-018,WAC-021,WAC-022,WAC-023,WAC-024,WAC-201,WAC-AS1-001,WAC-AS1-002	10	28822099	28822185	63.49	0.039	0.01	0.021	0.01						#-nan	#-nan	#-nan
AC006129.2	WBP1L	WBP1L	WBP1L-201	10	104503666	104503780	82.51	0	0	0.052	0	2	.,rs189586966	0.02	0.02	0.02	#-nan	-0.9	-1.26
AC006129.2	WDFY4	WDFY4	WDFY4-005	10	50186615	50186705	62.51	0.023	0	0.011	0	1	rs76199024	0	0.04	0.02	-0.76	#-nan	-0.57
AC006129.2	WDR11	WDR11	WDR11-001,WDR11-004,WDR11-007,WDR11-008,WDR11-009,WDR11-010,WDR11-016	10	122608227	122608314	62.2	0.031	0.021	0.021	0	2	.,rs181886012	0.1	0.21	0.11	1.49	0.77	0.71
AC006129.2	WDR11-AS1	WDR11-DT	WDR11-AS1-002	10	122552443	122552558	80.64	0	0	0.018	0	2	.,.	0.16	0.18	0.17	-0.9	#-nan	0.73
AC006129.2	WDR37	WDR37	WDR37-001	10	1092607	1093276	448.63	0.196	0.006	0.002	0						#-nan	#-nan	#-nan
AC006129.2	WDR37	WDR37	WDR37-002,WDR37-004,WDR37-201(*)	10	1102377	1102504	91.98	0.008	0	0.008	0	1	rs10903358	0.2	0	0.19	0.89	-0.96	#-nan
AC006129.2	WDR37	WDR37	WDR37-003	10	1170539	1170640	71.57	0	0	0.011	0						#-nan	#-nan	#-nan
AC006129.2	WDR37	WDR37	WDR37-005	10	1120491	1120578	61.34	0.057	0	0.039	0	1	rs41313808	0.01	#-nan	0.01	-0.9	#-nan	#-nan
AC006129.2	XPNPEP1	XPNPEP1	XPNPEP1-002,XPNPEP1-003,XPNPEP1-005,XPNPEP1-007,XPNPEP1-009,XPNPEP1-014,XPNPEP1-015,XPNPEP1-016,XPNPEP1-022,XPNPEP1-201,XPNPEP1-202	10	111686234	111686321	61.34	0.014	0	0.012	0						#-nan	#-nan	#-nan
AC006129.2	XPNPEP1	XPNPEP1	XPNPEP1-002,XPNPEP1-003,XPNPEP1-005,XPNPEP1-007,XPNPEP1-009,XPNPEP1-014,XPNPEP1-015,XPNPEP1-016,XPNPEP1-022,XPNPEP1-201,XPNPEP1-202	10	111683251	111683348	69.12	0.014	0	0.012	0						#-nan	#-nan	#-nan
AC006129.2	Y_RNA.609	Y_RNA.609	Y_RNA.609-201	10	70262500	70262609	77.76	0	0	0	0	1	.	0.15	0.2	0.16	-0.7	-0.9	1.02
AC006129.2	ZCCHC24	ZCCHC24	ZCCHC24-001,ZCCHC24-002	10	81205882	81206016	93.66	0.008	0.021	0.021	0	1	rs7098690	0.03	0.01	0.02	#-nan	-0.9	-0.64
AC006129.2	ZEB1,ZEB1-AS1	ZEB1,ZEB1-AS1	ZEB1-001,ZEB1-002,ZEB1-003,ZEB1-004,ZEB1-005,ZEB1-007,ZEB1-008,ZEB1-009,ZEB1-010,ZEB1-011,ZEB1-012,ZEB1-013,ZEB1-015,ZEB1-016,ZEB1-017,ZEB1-018,ZEB1-019,ZEB1-020,ZEB1-021,ZEB1-022,ZEB1-024,ZEB1-025,ZEB1-201,ZEB1-202,ZEB1-AS1-001,ZEB1-AS1-002,ZEB1-AS1-003,ZEB1-AS1-004,ZEB1-AS1-005,ZEB1-AS1-006,ZEB1-AS1-007,ZEB1-AS1-008,ZEB1-AS1-009	10	31608485	31608639	107.1	0.013	0.007	0.007	0.007	1	rs1576050	0.93	0.74	0.74	-0.44	1.14	-0.9
AC006129.2	ZEB1	ZEB1	ZEB1-023(*)	10	31670838	31670938	72.27	0	0	0	0	1	rs161230	0	0.06	0.03	-0.5	#-nan	-0.32
AC006129.2	ZFAND4	ZFAND4	ZFAND4-002,ZFAND4-003,ZFAND4-004,ZFAND4-005,ZFAND4-007,ZFAND4-008,ZFAND4-201	10	46168075	46168166	66.6	0	0	0.011	0						#-nan	#-nan	#-nan
AC006129.2	ZFAND4	ZFAND4	ZFAND4-002,ZFAND4-003,ZFAND4-004,ZFAND4-005,ZFAND4-007,ZFAND4-008,ZFAND4-201	10	46167889	46167983	68.82	0	0	0.011	0	1	rs183428427	#-nan	0.01	0.01	#-nan	-0.77	#-nan
AC006129.2	ZFYVE27	ZFYVE27	ZFYVE27-003,ZFYVE27-005,ZFYVE27-006,ZFYVE27-007,ZFYVE27-201,ZFYVE27-202,ZFYVE27-203,ZFYVE27-204,ZFYVE27-205,ZFYVE27-206	10	99497303	99497420	82.32	0.009	0	0.009	0	2	rs150596418,rs116552713	0.07	0.07	0.07	#-nan	#-nan	-0.83
AC006129.2	ZFYVE27	ZFYVE27	ZFYVE27-008	10	99510981	99511066	60.49	0	0	0.012	0	1	rs140910467	0.01	0.01	0.01	#-nan	#-nan	-0.9
AC006129.2	ZMIZ1,ZMIZ1-AS1	ZMIZ1,ZMIZ1-AS1	ZMIZ1-001,ZMIZ1-AS1-001,ZMIZ1-AS1-002	10	80826993	80827086	64.68	0.011	0	0.011	0	1	rs188888833	0.04	0.32	0.26	-0.5	1.63	#-nan
AC006129.2	ZMIZ1	ZMIZ1	ZMIZ1-002	10	81003548	81003645	65.12	0	0	0.01	0	1	rs150430589	0.05	0.05	0.05	#-nan	#-nan	-0.45
AC006129.2	ZMIZ1	ZMIZ1	ZMIZ1-201(*)	10	81045743	81045831	61.74	0	0	0	0						#-nan	#-nan	#-nan
AC006129.2	ZMIZ1-AS1	ZMIZ1-AS1	ZMIZ1-AS1-004	10	80724944	80725080	95.34	0	0	0	0						#-nan	#-nan	#-nan
AC006129.2	ZMYND11	ZMYND11	ZMYND11-002,ZMYND11-003,ZMYND11-004,ZMYND11-005,ZMYND11-009,ZMYND11-201,ZMYND11-202,ZMYND11-204,ZMYND11-205,ZMYND11-206	10	180932	181022	66.14	0.01	0.021	0.021	0						#-nan	#-nan	#-nan
AC006129.2	ZMYND11	ZMYND11	ZMYND11-002,ZMYND11-003,ZMYND11-004,ZMYND11-005,ZMYND11-009,ZMYND11-201,ZMYND11-202,ZMYND11-204,ZMYND11-205,ZMYND11-206	10	181790	181891	72.58	0.01	0.021	0.021	0						#-nan	#-nan	#-nan
AC006129.2	ZMYND11	ZMYND11	ZMYND11-002,ZMYND11-003,ZMYND11-004,ZMYND11-005,ZMYND11-009,ZMYND11-201,ZMYND11-202,ZMYND11-204,ZMYND11-205,ZMYND11-206	10	180930	181022	67.01	0.01	0.021	0.021	0						#-nan	#-nan	#-nan
AC006129.2	ZMYND11	ZMYND11	ZMYND11-003,ZMYND11-004,ZMYND11-005,ZMYND11-204	10	182252	182377	88.61	0.01	0.021	0.021	0	2	rs114996501,rs140144497	0.06	0.06	0.06	#-nan	#-nan	-0.65
AC006129.2	ZNF239	ZNF239	ZNF239-002,ZNF239-003,ZNF239-201,ZNF239-202	10	44069615	44069710	67.31	0.034	0	0	0						#-nan	#-nan	#-nan
AC006129.2	ZNF32	ZNF32	ZNF32-001,ZNF32-003,ZNF32-201	10	44144253	44144344	63.9	0.014	0	0	0						#-nan	#-nan	#-nan
AC006129.2	ZNF365	ZNF365	ZNF365-001,ZNF365-002,ZNF365-003,ZNF365-004,ZNF365-010	10	64134018	64134115	66.1	0.011	0	0	0						#-nan	#-nan	#-nan
AC006129.2	ZNF438	ZNF438	ZNF438-002,ZNF438-201,ZNF438-202,ZNF438-203,ZNF438-205	10	31321340	31321500	111.3	0.013	0	0.02	0	5	rs78771962,rs111783722,.,rs199618168,.	0.03	0.04	0.03	-1.08	#-nan	-0.38
AC006129.2	ZNF487	ZNF487	ZNF487-001,ZNF487-002,ZNF487-003,ZNF487-005,ZNF487-006,ZNF487-201	10	43932669	43932798	92.45	0.008	0	0.008	0	1	rs74137730	0.03	0.04	0.04	#-nan	#-nan	-0.57
AC006129.2	ZNF503-AS1	ZNF503-AS1	ZNF503-AS1-001,ZNF503-AS1-004,ZNF503-AS1-005,ZNF503-AS1-006	10	77054418	77054527	77.53	0.019	0	0.063	0	1	rs79526274	0.13	0.14	0.14	#-nan	#-nan	0.4
AC006129.2	ZNF503-AS2	ZNF503-AS2	ZNF503-AS2-004,ZNF503-AS2-201	10	77158459	77158569	77.96	0	0	0	0						#-nan	#-nan	#-nan
AC006129.2	ZNF518A	ZNF518A	ZNF518A-001,ZNF518A-008	10	97914122	97914213	63	0.023	0	0.011	0						#-nan	#-nan	#-nan
AC006129.2	ZNF518A,AC021037.1	ZNF518A,AC021037.1	ZNF518A-002,ZNF518A-003,ZNF518A-004,ZNF518A-005,ZNF518A-006,ZNF518A-007,ZNF518A-201,ZNF518A-202,AC021037.1-201(*)	10	97889601	97889698	68.16	0.022	0	0.022	0						#-nan	#-nan	#-nan
AC006129.2	ZNF518A	ZNF518A	ZNF518A-201(*)	10	97907726	97907844	78.39	0	0	0	0	1	rs11593049	0.28	0.07	0.34	1.94	-0.71	0.35
AC006129.2	ZNRD1-AS1_2.2	ZNRD1-AS1_2.2	ZNRD1-AS1_2.2-201(*)	10	123711167	123711263	67.73	0	0	0	0	1	rs143010155	0.28	0.31	0.29	-0.76	-0.96	-0.97
AC006129.2	ZSWIM8	ZSWIM8	ZSWIM8-012,ZSWIM8-013,ZSWIM8-018,ZSWIM8-019,ZSWIM8-021,ZSWIM8-027,ZSWIM8-201	10	75545493	75545620	89.04	0	0	0	0						#-nan	#-nan	#-nan
AC006129.2	ACAD8,THYN1	ACAD8,THYN1	ACAD8-001,ACAD8-002,ACAD8-004,ACAD8-005,ACAD8-006,ACAD8-007,ACAD8-008,ACAD8-009,ACAD8-010,ACAD8-011,ACAD8-012,ACAD8-013,ACAD8-014,ACAD8-201,ACAD8-202,THYN1-001,THYN1-002,THYN1-003,THYN1-004,THYN1-005,THYN1-006,THYN1-008,THYN1-009	11	134123752	134123914	117.07	0.044	0	0.039	0	1	rs112544573	0.17	0.18	0.17	#-nan	#-nan	1.68
AC006129.2	ACAD8,THYN1	ACAD8,THYN1	ACAD8-001,ACAD8-002,ACAD8-004,ACAD8-005,ACAD8-006,ACAD8-007,ACAD8-008,ACAD8-009,ACAD8-010,ACAD8-011,ACAD8-012,ACAD8-013,ACAD8-014,ACAD8-201,ACAD8-202,THYN1-001,THYN1-002,THYN1-003,THYN1-004,THYN1-005,THYN1-006,THYN1-008,THYN1-009	11	134123748	134123918	122.26	0.044	0	0.039	0	1	rs112544573	0.17	0.18	0.17	#-nan	#-nan	1.68
AC006129.2	ACAD8	ACAD8	ACAD8-010,ACAD8-011,ACAD8-015,ACAD8-016,ACAD8-017	11	134127534	134127623	61.27	10	0.027	0.048	0						#-nan	#-nan	#-nan
AC006129.2	ACAD8	ACAD8	ACAD8-016,ACAD8-017,ACAD8-018	11	134129280	134129401	87.26	10	0.027	0.048	0	1	rs142958309	0	#-nan	0	0.17	#-nan	#-nan
AC006129.2	ADAMTS8	ADAMTS8	ADAMTS8-001	11	130298378	130298510	93.29	0.016	0	0.016	0	1	rs903024	0.37	0.49	0.32	1.82	1.46	0.4
AC006129.2	AP003041.1	AP003041.1	AP003041.1-201(*)	11	129993710	129993811	71.57	0	0	0	0	1	rs115641832	0.02	0.03	0.02	#-nan	#-nan	-0.7
AC006129.2	AP005135.2	LINC02684	AP005135.2-001	11	134946163	134946271	77.11	10	0	0	0						#-nan	#-nan	#-nan
AC006129.2	APLP2	APLP2	APLP2-001,APLP2-002,APLP2-003,APLP2-005,APLP2-008,APLP2-009,APLP2-010,APLP2-011,APLP2-014,APLP2-015,APLP2-018,APLP2-020,APLP2-021,APLP2-022,APLP2-023,APLP2-027,APLP2-028,APLP2-029,APLP2-031,APLP2-201,APLP2-202	11	129940405	129940498	69.26	0	0.014	0.014	0	1	.	0.2	0.02	0.1	-0.5	1	1.51
AC006129.2	APLP2	APLP2	APLP2-024,APLP2-025,APLP2-026	11	130008492	130008595	71.4	0.01	0.01	0.02	0	1	rs60275844	0.24	0.14	0.17	#-nan	-0.42	1.2
AC006129.2	ARHGAP32	ARHGAP32	ARHGAP32-009	11	129149034	129149229	142.79	0.045	0	0	0						#-nan	#-nan	#-nan
AC006129.2	B3GAT1	B3GAT1	B3GAT1-001,B3GAT1-003,B3GAT1-201	11	134282810	134282921	78.38	0.019	0.009	0.019	0.009	2	rs113996434,rs184499231	0.04	0.04	0.04	#-nan	#-nan	-0.99
AC006129.2	BARX2	BARX2	BARX2-001	11	129245765	129245885	88.04	0.008	0	0.008	0	1	rs148755114	0.05	0.06	0.11	-0.5	1.49	0.45
AC006129.2	BARX2	BARX2	BARX2-002,BARX2-004	11	129302784	129302869	61.34	0	0.021	0.021	0	1	rs60613907	0.06	0.06	0.06	#-nan	#-nan	-0.32
AC006129.2	ETS1	ETS1	ETS1-003,ETS1-005,ETS1-006,ETS1-201,ETS1-202	11	128392195	128392439	174.96	0.004	0	0.004	0						#-nan	#-nan	#-nan
AC006129.2	ETS1,MIR6090	ETS1,MIR6090	ETS1-003,ETS1-005,ETS1-006,ETS1-201,ETS1-202,MIR6090-201(*)	11	128392200	128392456	184.46	0.004	0	0.004	0						#-nan	#-nan	#-nan
AC006129.2	ETS1	ETS1	ETS1-010	11	128377105	128377191	63.49	0.025	0.021	0.021	0	1	rs183956810	#-nan	0	0	#-nan	-0.96	#-nan
AC006129.2	FLI1	FLI1	FLI1-001,FLI1-002,FLI1-003,FLI1-008,FLI1-202,FLI1-201(*)	11	128563774	128563864	64.37	0.014	0	0.013	0	1	.	0.04	0.05	0.03	2.32	1.89	-0.97
AC006129.2	GLB1L2	GLB1L2	GLB1L2-002,GLB1L2-201,GLB1L2-202	11	134201593	134201734	98.28	0.015	0.021	0.021	0	3	.,.,rs3132808	0.02	0.01	0.01	#-nan	#-nan	#-nan
AC006129.2	GLB1L2	GLB1L2	GLB1L2-007	11	134229905	134229998	63.76	0.036	0	0.011	0						#-nan	#-nan	#-nan
AC006129.2	GLB1L3	GLB1L3	GLB1L3-003,GLB1L3-006,GLB1L3-009	11	134178124	134178469	247.97	0.146	0.081	0.028	0						#-nan	#-nan	#-nan
AC006129.2	IGSF9B	IGSF9B	IGSF9B-004	11	133817611	133817911	210.42	0.037	0.007	0.018	0	4	rs695134,rs77597368,rs507378,rs150621057	0.29	0.11	0.15	0.85	2.49	0.92
AC006129.2	IGSF9B	IGSF9B	IGSF9B-006	11	133809975	133810221	174.23	0	0.008	0.026	0	3	rs34124294,rs11223631,rs35261319	0.19	0.31	0.18	0.49	-0.31	-0.97
AC006129.2	JAM3	JAM3	JAM3-001,JAM3-002,JAM3-004,JAM3-005,JAM3-008,JAM3-201	11	133939361	133939520	115.63	0.044	0.013	0	0						#-nan	#-nan	#-nan
AC006129.2	LINC00167,PRDM10	PRDM10-DT,PRDM10	LINC00167-002,PRDM10-001,PRDM10-003,PRDM10-005,PRDM10-009,PRDM10-010	11	129871970	129872068	70.42	0.011	0	0.017	0						#-nan	#-nan	#-nan
AC006129.2	LINC00167,PRDM10	PRDM10-DT,PRDM10	LINC00167-002,PRDM10-001,PRDM10-003,PRDM10-005,PRDM10-009,PRDM10-010	11	129871949	129872123	123.11	0.011	0	0.017	0						#-nan	#-nan	#-nan
AC006129.2	LINC00167,PRDM10	PRDM10-DT,PRDM10	LINC00167-002,PRDM10-001,PRDM10-003,PRDM10-005,PRDM10-009,PRDM10-010	11	129871704	129871824	85.97	0.011	0	0.017	0	2	rs111630992,rs4264162	0.04	0	0.02	-0.98	-0.42	-0.01
AC006129.2	MIR4697	MIR4697	MIR4697-201	11	133771715	133771909	139.54	0.033	0.029	0.022	0.011	3	rs4937852,.,rs4937851	0.22	0.31	0.19	2.58	2.53	0.79
AC006129.2	MIR4697HG	MIR4697HG	MIR4697HG-001(*)	11	133772058	133772338	203.67	0	0	0	0	2	rs200360852,rs201386039	0.11	0.12	0.11	#-nan	#-nan	-0.9
AC006129.2	NCAPD3,VPS26B	NCAPD3,VPS26B	NCAPD3-001,NCAPD3-002,NCAPD3-003,NCAPD3-005,NCAPD3-006,NCAPD3-007,NCAPD3-008,NCAPD3-009,VPS26B-001,VPS26B-002,VPS26B-003,VPS26B-004	11	134094439	134094608	124.32	0.012	0.009	0.009	0.009						#-nan	#-nan	#-nan
AC006129.2	NCAPD3,VPS26B	NCAPD3,VPS26B	NCAPD3-001,NCAPD3-002,NCAPD3-003,NCAPD3-005,NCAPD3-006,NCAPD3-007,NCAPD3-008,NCAPD3-009,VPS26B-001,VPS26B-002,VPS26B-003,VPS26B-004	11	134094423	134094540	87.02	0.012	0.009	0.009	0.009						#-nan	#-nan	#-nan
AC006129.2	NCAPD3,VPS26B	NCAPD3,VPS26B	NCAPD3-001,NCAPD3-002,NCAPD3-003,NCAPD3-005,NCAPD3-006,NCAPD3-007,NCAPD3-008,NCAPD3-009,VPS26B-001,VPS26B-002,VPS26B-003,VPS26B-004	11	134094706	134094826	83.21	0.012	0.009	0.009	0.009						#-nan	#-nan	#-nan
AC006129.2	NCAPD3,VPS26B	NCAPD3,VPS26B	NCAPD3-001,NCAPD3-002,NCAPD3-003,NCAPD3-005,NCAPD3-006,NCAPD3-007,NCAPD3-008,NCAPD3-009,VPS26B-001,VPS26B-002,VPS26B-003,VPS26B-004	11	134094709	134094844	94.92	0.012	0.009	0.009	0.009						#-nan	#-nan	#-nan
AC006129.2	NCAPD3	NCAPD3	NCAPD3-013	11	134037495	134037588	61.91	0.107	0	0	0	1	rs10569176	0.12	0.03	0.06	-0.37	-0.96	-0.45
AC006129.2	NFRKB	NFRKB	NFRKB-001,NFRKB-002,NFRKB-003,NFRKB-004,NFRKB-005,NFRKB-006,NFRKB-007,NFRKB-008,NFRKB-009,NFRKB-010,NFRKB-201	11	129765509	129765621	78.81	0.008	0.017	0.055	0.025	2	rs186289479,rs147901126	0.08	0.08	0.08	#-nan	#-nan	-0.2
AC006129.2	NFRKB	NFRKB	NFRKB-001,NFRKB-002,NFRKB-003,NFRKB-004,NFRKB-005,NFRKB-006,NFRKB-007,NFRKB-008,NFRKB-009,NFRKB-010,NFRKB-201	11	129765515	129765643	88.18	0.008	0.017	0.055	0.025	3	rs3108963,rs186289479,rs147901126	0.06	0.16	0.1	0.42	-0.6	0.58
AC006129.2	OPCML	OPCML	OPCML-001,OPCML-002,OPCML-005,OPCML-201,OPCML-202(*)	11	132813627	132813717	66.14	0	0	0	0						#-nan	#-nan	#-nan
AC006129.2	OPCML-IT1	OPCML-IT1	OPCML-IT1-001	11	133238097	133238201	73.7	0.047	0	0.02	0	3	rs201381454,rs115651507,rs150885854	0.07	0	0.05	#-nan	#-nan	-1.21
AC006129.2	RP11-121M22.1,ZBTB44	ZBTB44-DT,ZBTB44	RP11-121M22.1-002,RP11-121M22.1-003,RP11-121M22.1-004,ZBTB44-001,ZBTB44-002,ZBTB44-003,ZBTB44-201	11	130184306	130184675	266.11	0	0.014	0.014	0.007						#-nan	#-nan	#-nan
AC006129.2	RP11-121M22.1,ZBTB44	ZBTB44-DT,ZBTB44	RP11-121M22.1-002,RP11-121M22.1-003,RP11-121M22.1-004,ZBTB44-001,ZBTB44-002,ZBTB44-003,ZBTB44-201,ZBTB44-202(*)	11	130184376	130184526	109.94	0	0.014	0.014	0.007						#-nan	#-nan	#-nan
AC006129.2	RP11-264E20.2	RP11-264E20.2	RP11-264E20.2-001	11	128485458	128485552	66.96	0	0	0.022	0	2	rs12419852,rs141463539	0.04	0.05	0.09	0.76	0.67	1.53
AC006129.2	RP11-627G23.1	B3GAT1-DT	RP11-627G23.1-001,RP11-627G23.1-003	11	134305044	134305153	74.26	0.031	0	0.019	0	2	rs10791362,rs145932275	0.05	0.16	0.09	-0.66	0.96	-0.83
AC006129.2	RP11-713P17.3	LINC02731	RP11-713P17.3-001,RP11-713P17.3-002,RP11-713P17.3-004,RP11-713P17.3-005,RP11-713P17.3-006	11	133901189	133901308	86.72	0.009	0	0.027	0	2	rs75906836,rs78055781	0.04	0	0.03	-0.44	-0.9	-0.97
AC006129.2	TMEM45B	TMEM45B	TMEM45B-001,TMEM45B-003,TMEM45B-004,TMEM45B-005	11	129685624	129685731	75.83	0.032	0	0.019	0	1	rs184223458	0	#-nan	0	-0.97	#-nan	#-nan
AC006129.2	TMEM45B	TMEM45B	TMEM45B-002	11	129718248	129718381	89.24	0.032	0.021	0.021	0	2	rs144938284,rs2248097	0	0	0	1.26	1.96	0.29
AC006129.2	VPS26B	VPS26B	VPS26B-005	11	134102535	134102628	64.68	0.049	0	0	0						#-nan	#-nan	#-nan
AC006129.2	AC010203.1	AC010203.1	AC010203.1-201	12	100551651	100551739	61.74	0	0	0	0						#-nan	#-nan	#-nan
AC006129.2	AC011313.1,C12orf75	AC011313.1,C12orf75	AC011313.1-201,C12orf75-001,C12orf75-003,C12orf75-005,C12orf75-006,C12orf75-008,C12orf75-201(*)	12	105724441	105724559	85.41	0	0.009	0.009	0	1	rs139854423	0.03	#-nan	0.03	-0.63	#-nan	#-nan
AC006129.2	ACACB	ACACB	ACACB-006,ACACB-201,ACACB-202	12	109578047	109578134	63.07	0.153	0.024	0.142	0	6	rs4766495,rs142222871,rs113159614,.,.,.	0.08	0.05	0.1	0.05	1.08	0.16
AC006129.2	ACACB	ACACB	ACACB-008	12	109626098	109626303	148.92	0.028	0.01	0.015	0.005	3	rs73191118,rs2268401,rs185906137	0.11	0.07	0.11	0.41	2.64	1.85
AC006129.2	ACSS3,LIN7A,MIR618	ACSS3,LIN7A,MIR618	ACSS3-007,LIN7A-001,LIN7A-002,LIN7A-003,MIR618-201	12	81331045	81331158	82.34	0.015	0	0	0						#-nan	#-nan	#-nan
AC006129.2	ALDH1L2	ALDH1L2	ALDH1L2-001,ALDH1L2-002,ALDH1L2-004,ALDH1L2-201	12	105478312	105478436	86.1	0.017	0.008	0.017	0.008	2	rs7303961,rs7304175	0.02	0.02	0.04	0.16	-0.48	-0.56
AC006129.2	ALDH2	ALDH2	ALDH2-001,ALDH2-003,ALDH2-005	12	112204663	112204768	76.21	0.021	0	0.01	0						#-nan	#-nan	#-nan
AC006129.2	AMDHD1,CCDC38	AMDHD1,CCDC38	AMDHD1-001,AMDHD1-002,AMDHD1-004,CCDC38-001,CCDC38-002,CCDC38-004,CCDC38-005,CCDC38-006	12	96338144	96338262	78.01	0.018	0.011	0.011	0.011						#-nan	#-nan	#-nan
AC006129.2	AMDHD1,CCDC38	AMDHD1,CCDC38	AMDHD1-001,AMDHD1-002,CCDC38-001,CCDC38-002,CCDC38-004,CCDC38-005,CCDC38-006	12	96336369	96336468	70.85	0.018	0.011	0.011	0.011	1	rs10859991	0.11	0	0.1	1.66	0.15	0.35
AC006129.2	ANAPC7	ANAPC7	ANAPC7-009	12	110825043	110825193	107.57	10	0.06	0.107	0						#-nan	#-nan	#-nan
AC006129.2	ANKRD13A,GIT2	ANKRD13A,GIT2	ANKRD13A-001,ANKRD13A-002,ANKRD13A-004,GIT2-001,GIT2-002,GIT2-004,GIT2-005,GIT2-006,GIT2-007,GIT2-008,GIT2-010,GIT2-011,GIT2-012,GIT2-201,GIT2-202,GIT2-203,GIT2-204,GIT2-205	12	110433901	110434006	78.14	0.026	0.021	0.021	0						#-nan	#-nan	#-nan
AC006129.2	ANKRD13A,GIT2	ANKRD13A,GIT2	ANKRD13A-001,ANKRD13A-002,ANKRD13A-004,GIT2-001,GIT2-002,GIT2-004,GIT2-005,GIT2-006,GIT2-007,GIT2-008,GIT2-010,GIT2-011,GIT2-012,GIT2-201,GIT2-202,GIT2-203,GIT2-204,GIT2-205	12	110437276	110437409	97.24	0.026	0.021	0.021	0						#-nan	#-nan	#-nan
AC006129.2	ANKRD13A,GIT2	ANKRD13A,GIT2	ANKRD13A-001,ANKRD13A-002,ANKRD13A-004,GIT2-001,GIT2-002,GIT2-004,GIT2-005,GIT2-006,GIT2-007,GIT2-008,GIT2-010,GIT2-011,GIT2-012,GIT2-201,GIT2-202,GIT2-203,GIT2-204,GIT2-205	12	110437271	110437391	85.97	0.026	0.021	0.021	0						#-nan	#-nan	#-nan
AC006129.2	ANKRD13A,GIT2,RP11-837J7.3	ANKRD13A,GIT2,RP11-837J7.3	ANKRD13A-001,ANKRD13A-002,ANKRD13A-004,GIT2-001,GIT2-002,GIT2-004,GIT2-005,GIT2-006,GIT2-007,GIT2-008,GIT2-010,GIT2-011,GIT2-012,GIT2-201,GIT2-202,GIT2-203,GIT2-204,GIT2-205,RP11-837J7.3-001(*)	12	110437264	110437363	70.85	0.026	0.021	0.021	0						#-nan	#-nan	#-nan
AC006129.2	ANKS1B	ANKS1B	ANKS1B-001,ANKS1B-002,ANKS1B-003,ANKS1B-201	12	100378517	100378714	139.73	0.069	0	0.005	0	1	rs142103377	0.02	0.01	0.01	-0.97	-0.9	-0.57
AC006129.2	ANKS1B	ANKS1B	ANKS1B-006,ANKS1B-010,ANKS1B-016,ANKS1B-024,ANKS1B-025,ANKS1B-026,ANKS1B-027,ANKS1B-028,ANKS1B-032,ANKS1B-033	12	99288871	99289073	147.61	0.027	0	0.011	0	2	rs140856498,rs191311739	0.02	0.03	0.05	-0.47	-0.9	-0.91
AC006129.2	ANKS1B	ANKS1B	ANKS1B-006,ANKS1B-010,ANKS1B-016,ANKS1B-024,ANKS1B-025,ANKS1B-026,ANKS1B-027,ANKS1B-028,ANKS1B-032,ANKS1B-033	12	99288874	99289074	145.85	0.027	0	0.011	0	2	rs140856498,rs191311739	0.02	0.03	0.05	-0.47	-0.9	-0.91
AC006129.2	ANKS1B	ANKS1B	ANKS1B-006,ANKS1B-010,ANKS1B-016,ANKS1B-024,ANKS1B-025,ANKS1B-026,ANKS1B-027,ANKS1B-028,ANKS1B-032,ANKS1B-033	12	99288582	99288741	114.91	0.027	0	0.011	0	1	rs112289637	0.28	0.28	0.18	1.94	1.96	0.08
AC006129.2	ANKS1B	ANKS1B	ANKS1B-030	12	99139680	99139777	68.16	0	0	0	0						#-nan	#-nan	#-nan
AC006129.2	ANO4	ANO4	ANO4-003,ANO4-202	12	101111121	101111266	103.68	0.014	0.007	0.015	0.007	2	rs151022602,rs12310954	0	0.01	0.01	0.71	0.26	0.35
AC006129.2	ANO4	ANO4	ANO4-005	12	101382111	101382196	60.48	0.012	0	0.012	0	1	rs138916213	0	0	0	#-nan	#-nan	-0.97
AC006129.2	ANO4,RP11-350G24.1	ANO4,RP11-350G24.1	ANO4-008,RP11-350G24.1-001	12	101433183	101433297	77.93	0.018	0	0.019	0	1	rs138635388	0.05	0.05	0.05	#-nan	#-nan	-0.45
AC006129.2	APPL2,C12orf75	APPL2,C12orf75	APPL2-001,APPL2-002,APPL2-003,APPL2-004,APPL2-005,APPL2-006,C12orf75-004	12	105629900	105630063	115.02	0.017	0.013	0.006	0.02						#-nan	#-nan	#-nan
AC006129.2	APPL2,C12orf75	APPL2,C12orf75	APPL2-001,APPL2-002,APPL2-003,APPL2-004,APPL2-005,APPL2-006,C12orf75-004	12	105629903	105630073	122.26	0.017	0.013	0.006	0.02						#-nan	#-nan	#-nan
AC006129.2	ARL1,RNU6-1068P	ARL1,RNU6-1068P	ARL1-001,ARL1-004,ARL1-005,ARL1-006,ARL1-007,ARL1-008,ARL1-009,ARL1-010,ARL1-011,ARL1-013,RNU6-1068P-201	12	101802029	101802121	67.93	0.112	0	0.016	0	1	rs150525337	0.01	0.01	0.01	#-nan	#-nan	-0.9
AC006129.2	ARL1,RNU6-1068P	ARL1,RNU6-1068P	ARL1-001,ARL1-004,ARL1-005,ARL1-006,ARL1-007,ARL1-008,ARL1-009,ARL1-010,ARL1-011,ARL1-013,RNU6-1068P-201	12	101802031	101802122	64.8	0.112	0	0.016	0	1	rs150525337	0.01	0.01	0.01	#-nan	#-nan	-0.9
AC006129.2	ATP2A2	ATP2A2	ATP2A2-001,ATP2A2-002,ATP2A2-003,ATP2A2-004,ATP2A2-201	12	110719203	110719308	76.21	0.056	0	0	0						#-nan	#-nan	#-nan
AC006129.2	ATP2B1,LINC00936	ATP2B1,ATP2B1-AS1	ATP2B1-001,ATP2B1-005,LINC00936-001	12	90102648	90102841	139.1	0.012	0.005	0.005	0	1	rs12369944	0.1	0.05	0.05	0.04	-0.42	#-nan
AC006129.2	ATP2B1,LINC00936	ATP2B1,ATP2B1-AS1	ATP2B1-001,ATP2B1-005,LINC00936-001	12	90103409	90103576	118.43	0.012	0.005	0.005	0	1	rs61926785	0.14	#-nan	0.14	0.42	#-nan	#-nan
AC006129.2	ATXN2,RP11-686G8.2	ATXN2,ATXN2-AS	ATXN2-001,ATXN2-002,ATXN2-003,ATXN2-005,ATXN2-011,ATXN2-016,ATXN2-017,ATXN2-018,ATXN2-025,ATXN2-201,RP11-686G8.2-001,ATXN2-202(*)	12	112037118	112037222	75.77	0	0	0	0						#-nan	#-nan	#-nan
AC006129.2	ATXN2	ATXN2	ATXN2-009	12	111954131	111954228	66.1	0	0	0	0						#-nan	#-nan	#-nan
AC006129.2	ATXN2	ATXN2	ATXN2-023	12	111912201	111912297	65.83	0.023	0	0	0						#-nan	#-nan	#-nan
AC006129.2	BTBD11	ABTB3	BTBD11-004	12	107974953	107975128	126.14	0.006	0	0	0						#-nan	#-nan	#-nan
AC006129.2	BTG1,C12orf79,RP11-796E2.4	BTG1,LINC01619,BTG1-DT	BTG1-001,BTG1-003,C12orf79-001,C12orf79-002,C12orf79-003,C12orf79-004,C12orf79-006,C12orf79-009,RP11-796E2.4-001,RP11-796E2.4-002,RP11-796E2.4-003(*)	12	92539282	92539368	62.63	0.012	0.012	0	0.012	1	rs709223	0.16	0.29	0.16	0.62	1.51	#-nan
AC006129.2	C12orf23,RP11-412D9.4	C12orf23,TMEM263-DT	C12orf23-001,C12orf23-002,C12orf23-004,C12orf23-005,C12orf23-006,C12orf23-007,RP11-412D9.4-001	12	107349780	107349919	100.22	0.007	0.007	0.008	0.007	1	rs11837205	0.05	0.06	0.05	#-nan	#-nan	-0.38
AC006129.2	C12orf42	C12orf42	C12orf42-001,C12orf42-002,C12orf42-003,C12orf42-004,C12orf42-005,C12orf42-006,C12orf42-007,C12orf42-008,C12orf42-009,C12orf42-201,C12orf42-202	12	103889169	103889280	78.38	0.03	0	0	0						#-nan	#-nan	#-nan
AC006129.2	C12orf42	C12orf42	C12orf42-001,C12orf42-002,C12orf42-003,C12orf42-004,C12orf42-005,C12orf42-006,C12orf42-007,C12orf42-008,C12orf42-009,C12orf42-201,C12orf42-202	12	103889439	103889564	88.61	0.03	0	0	0						#-nan	#-nan	#-nan
AC006129.2	C12orf42	C12orf42	C12orf42-001,C12orf42-002,C12orf42-003,C12orf42-004,C12orf42-005,C12orf42-006,C12orf42-007,C12orf42-008,C12orf42-009,C12orf42-201,C12orf42-202	12	103889439	103889563	88.18	0.03	0	0	0						#-nan	#-nan	#-nan
AC006129.2	C12orf55,RP11-510I5.4	C12orf55,RP11-510I5.4	C12orf55-002,C12orf55-003,C12orf55-005,C12orf55-201,RP11-510I5.4-001	12	96879889	96880009	83.21	0	0	0.091	0	1	.	0.09	0.14	0.11	0.37	1.72	-0.9
AC006129.2	C12orf55	C12orf55	C12orf55-006	12	96941525	96941639	79.38	0	0	0	0	1	rs188670662	0	#-nan	0	-0.97	#-nan	#-nan
AC006129.2	C12orf73	UQCC6	C12orf73-001,C12orf73-002,C12orf73-003,C12orf73-006,C12orf73-007,C12orf73-008,C12orf73-009,C12orf73-010,C12orf73-011	12	104350955	104351046	63.84	0.07	0	0.038	0	2	rs2293619,rs2293620	0.07	0.13	0.14	-0.5	1.3	0.68
AC006129.2	C12orf73,TDG	UQCC6,TDG	C12orf73-004,C12orf73-005,TDG-001,TDG-002,TDG-003,TDG-004,TDG-005,TDG-007,TDG-008	12	104359673	104359859	134.35	0.028	0	0.013	0						#-nan	#-nan	#-nan
AC006129.2	C12orf73,TDG	UQCC6,TDG	C12orf73-004,C12orf73-005,TDG-001,TDG-002,TDG-003,TDG-004,TDG-005,TDG-007,TDG-008	12	104359699	104359805	74.55	0.028	0	0.013	0						#-nan	#-nan	#-nan
AC006129.2	C12orf74	C12orf74	C12orf74-001,C12orf74-002	12	93093612	93093717	74.98	0.01	0.01	0.01	0						#-nan	#-nan	#-nan
AC006129.2	C12orf75	C12orf75	C12orf75-007	12	105744136	105744235	70.85	0.011	0	0	0						#-nan	#-nan	#-nan
AC006129.2	C12orf76	C12orf76	C12orf76-001	12	110506019	110506140	84.84	0.134	0.037	0.069	0	3	rs7312502,rs141727966,rs144456440	0	0.09	0.04	-0.64	#-nan	-0.42
AC006129.2	C12orf76	C12orf76	C12orf76-003,C12orf76-005,C12orf76-006,C12orf76-008,C12orf76-009	12	110486035	110486209	123.11	0	0	0.012	0	2	rs191281727,rs75582595	0.01	0.01	0.01	-0.9	-0.83	#-nan
AC006129.2	C12orf76	C12orf76	C12orf76-003,C12orf76-005,C12orf76-006,C12orf76-008,C12orf76-009	12	110486016	110486131	81.79	0	0	0.012	0	1	rs75582595	#-nan	0.01	0.01	#-nan	-0.83	#-nan
AC006129.2	C12orf76	C12orf76	C12orf76-004,C12orf76-007	12	110514773	110514864	62.93	0.011	0	0.011	0	1	rs182059911	0	#-nan	0	-0.97	#-nan	#-nan
AC006129.2	CCDC59,METTL25	CCDC59,METTL25	CCDC59-001,CCDC59-002,CCDC59-003,CCDC59-004,CCDC59-005,CCDC59-006,CCDC59-007,METTL25-001,METTL25-002,METTL25-003,METTL25-004,METTL25-005,METTL25-007	12	82752609	82752706	68.16	0.032	0.021	0.021	0	3	rs4882530,.,rs190357738	0.08	0.3	0.17	-0.44	-0.96	0.36
AC006129.2	CCER1	CCER1	CCER1-001,CCER1-002,CCER1-004	12	91347491	91347615	86.94	0.022	0	0.017	0	1	.	#-nan	0.02	0.02	#-nan	-0.71	#-nan
AC006129.2	CDK17	CDK17	CDK17-001,CDK17-002,CDK17-003,CDK17-004,CDK17-005,CDK17-006	12	96793709	96793842	95.9	0.005	0	0	0						#-nan	#-nan	#-nan
AC006129.2	CDK17	CDK17	CDK17-001,CDK17-002,CDK17-003,CDK17-004,CDK17-005,CDK17-006	12	96793726	96793910	132.62	0.005	0	0	0						#-nan	#-nan	#-nan
AC006129.2	CHPT1,RP11-285E23.2	CHPT1,RP11-285E23.2	CHPT1-001,CHPT1-002,CHPT1-003,CHPT1-004,CHPT1-005,CHPT1-006,CHPT1-007,RP11-285E23.2-001(*)	12	102091549	102091770	158.98	0.014	0	0	0						#-nan	#-nan	#-nan
AC006129.2	CHST11	CHST11	CHST11-001,CHST11-002,CHST11-006,CHST11-007	12	104850819	104850925	76.46	0	0	0	0						#-nan	#-nan	#-nan
AC006129.2	CHST11	CHST11	CHST11-004	12	104846936	104847080	104.11	0.015	0.014	0.022	0.014	3	rs7489168,rs61937667,rs77178221	0.02	0.11	0.06	#-nan	#-nan	#-nan
AC006129.2	CKAP4,RP11-651L5.2	CKAP4,RP11-651L5.2	CKAP4-001,RP11-651L5.2-001	12	106641382	106641516	95	0	0.021	0.021	0						#-nan	#-nan	#-nan
AC006129.2	CKAP4,RP11-651L5.2,RP11-651L5.3	CKAP4,RP11-651L5.2,RP11-651L5.3	CKAP4-001,RP11-651L5.2-001,RP11-651L5.3-001(*)	12	106641354	106641509	111.46	0	0.021	0.021	0						#-nan	#-nan	#-nan
AC006129.2	CLLU1,RP11-693J15.4	CLLU1,RP11-693J15.4	CLLU1-003,CLLU1-005,RP11-693J15.4-001,CLLU1-001(*),CLLU1-002(*),CLLU1-004(*)	12	92814760	92814872	76.59	0.019	0	0.019	0	1	rs74994222	0.05	0.05	0.05	#-nan	#-nan	-0.45
AC006129.2	CLLU1OS	CLLU1-AS1	CLLU1OS-001,CLLU1OS-201	12	92822507	92822639	91.49	0.047	0	0.016	0	3	rs11106548;rs147196908,.,rs201430399	0.13	0	0.08	-0.83	0.61	-0.63
AC006129.2	CMKLR1	CMKLR1	CMKLR1-001,CMKLR1-002,CMKLR1-005,CMKLR1-201	12	108735897	108736089	142.52	0.005	0	0.02	0	3	rs111164476,rs142549110,rs140042760	0.01	0	0.02	2.02	2.6	1.42
AC006129.2	CORO1C	CORO1C	CORO1C-001,CORO1C-002,CORO1C-003,CORO1C-007,CORO1C-010,CORO1C-011,CORO1C-012,CORO1C-013,CORO1C-014	12	109125097	109125209	79.92	0.009	0.021	0.021	0	1	rs11114043	0.02	#-nan	0.03	-0.7	#-nan	#-nan
AC006129.2	CORO1C	CORO1C	CORO1C-001,CORO1C-002,CORO1C-003,CORO1C-007,CORO1C-010,CORO1C-011,CORO1C-012,CORO1C-013,CORO1C-014	12	109125086	109125206	85.97	0.009	0.021	0.021	0	1	rs11114043	0.02	#-nan	0.03	-0.7	#-nan	#-nan
AC006129.2	CSRP2,RP11-461F16.3	CSRP2,RP11-461F16.3	CSRP2-001,CSRP2-002,CSRP2-004,CSRP2-005,CSRP2-006,CSRP2-007,RP11-461F16.3-001	12	77272860	77272955	69.2	0.04	0.021	0.021	0						#-nan	#-nan	#-nan
AC006129.2	CSRP2,RP11-461F16.3	CSRP2,RP11-461F16.3	CSRP2-001,CSRP2-002,CSRP2-004,CSRP2-005,CSRP2-006,CSRP2-007,RP11-461F16.3-001	12	77273135	77273223	61.77	0.04	0.021	0.021	0	2	rs1587110,rs79257097	0.28	0.25	0.2	1.45	1.6	0.49
AC006129.2	CUX2	CUX2	CUX2-002	12	111538024	111538235	147.84	0.011	0.01	0.02	0.01	3	rs11834402,rs150094837,rs113911678	0.07	0.08	0.07	-0.97	-0.9	-0.2
AC006129.2	DAO	DAO	DAO-001,DAO-003,DAO-005,DAO-008,DAO-009	12	109272757	109272850	63.76	0.041	0	0.011	0						#-nan	#-nan	#-nan
AC006129.2	DAO,SSH1	DAO,SSH1	DAO-006,DAO-007,SSH1-001,SSH1-002,SSH1-005,SSH1-201	12	109251070	109251305	164.4	0.005	0.004	0.004	0	1	.	0.08	0.1	0.09	-0.97	#-nan	0.08
AC006129.2	DAO	DAO	DAO-010	12	109289128	109289284	108.05	0.036	0.007	0.021	0	3	rs7962665,rs111164492,rs189499117	0.06	0	0.03	0.48	0.67	0.93
AC006129.2	DCN	DCN	DCN-003,DCN-005,DCN-007,DCN-008,DCN-009,DCN-010,DCN-011,DCN-012,DCN-015,DCN-017,DCN-018,DCN-203,DCN-204	12	91574088	91574179	62.1	0.023	0.012	0.049	0	3	rs73198649,.,.	0.16	0.1	0.09	-0.72	0	1.56
AC006129.2	DEPDC4,SCYL2	DEPDC4,SCYL2	DEPDC4-001,DEPDC4-002,DEPDC4-003,DEPDC4-004,DEPDC4-005,DEPDC4-006,DEPDC4-007,SCYL2-001,SCYL2-002,SCYL2-004,SCYL2-006	12	100661183	100661352	116.75	0.058	0.006	0.026	0.006	4	rs7316039,rs143748763,rs59031776,rs142547279	0	0.19	0.11	0.55	-0.31	-0.08
AC006129.2	DEPDC4,SCYL2	DEPDC4,SCYL2	DEPDC4-001,DEPDC4-002,DEPDC4-003,DEPDC4-004,DEPDC4-005,DEPDC4-006,DEPDC4-007,SCYL2-001,SCYL2-002,SCYL2-004,SCYL2-006	12	100660977	100661079	69.6	0.058	0.006	0.026	0.006						#-nan	#-nan	#-nan
AC006129.2	DLEU2_6.1	DLEU2_6.1	DLEU2_6.1-201(*)	12	92027615	92027754	100.22	0	0	0	0	5	rs7302740,rs6538286,rs58174539,rs191833487,rs73202571	0.1	0.11	0.12	-0.36	1.79	0.48
AC006129.2	DRAM1	DRAM1	DRAM1-001,DRAM1-002,DRAM1-003,DRAM1-004	12	102271133	102271234	68.54	0.01	0	0	0						#-nan	#-nan	#-nan
AC006129.2	DRAM1	DRAM1	DRAM1-006	12	102299505	102299598	61.78	0.011	0	0.011	0	1	.	0.23	0.04	0.12	1.48	1.96	1.61
AC006129.2	DUSP6	DUSP6	DUSP6-001,DUSP6-002,DUSP6-003,DUSP6-004,DUSP6-005	12	89747447	89747574	89.46	0.008	0	0.016	0	2	rs114117218,rs145732560	0.11	0.15	0.12	-0.83	#-nan	0.4
AC006129.2	E2F7	E2F7	E2F7-001,E2F7-002,E2F7-003,E2F7-004,E2F7-005	12	77459190	77459295	76.03	0.01	0	0.021	0	2	rs192310084,rs146575833	0	#-nan	0	-1.31	#-nan	#-nan
AC006129.2	EEA1	EEA1	EEA1-001,EEA1-002,EEA1-003,EEA1-004	12	93323040	93323149	78.62	0	0	0	0						#-nan	#-nan	#-nan
AC006129.2	EID3	EID3	EID3-001	12	104697384	104697498	80.22	0	0	0	0						#-nan	#-nan	#-nan
AC006129.2	ELK3	ELK3	ELK3-001,ELK3-002,ELK3-003,ELK3-004	12	96588580	96588746	115.5	0	0	0	0						#-nan	#-nan	#-nan
AC006129.2	FAM109A,RP3-473L9.4	PHETA1,LINC02356	FAM109A-001,FAM109A-005,FAM109A-006,FAM109A-201,RP3-473L9.4-002	12	111806747	111806863	78.74	0.096	0	0.012	0						#-nan	#-nan	#-nan
AC006129.2	FAM109A	PHETA1	FAM109A-002,FAM109A-007,FAM109A-202	12	111800748	111800869	87.26	0.026	0.008	0.017	0.008	2	rs139032867,rs186953579	0.01	0.38	0.33	#-nan	#-nan	-0.09
AC006129.2	FAM222A	FAM222A	FAM222A-001,FAM222A-003	12	110152185	110152299	84.8	0.009	0	0.009	0	1	rs825000	0.08	0	0.07	-0.13	-0.96	#-nan
AC006129.2	FAM222A-AS1	FAM222A-AS1	FAM222A-AS1-004	12	110175786	110175888	71.99	0	0	0.01	0	1	rs11068049	0.06	0.04	0.1	1.33	-0.48	0.29
AC006129.2	FAM71C	GARIN6	FAM71C-001	12	100041367	100041473	74.34	0.033	0	0	0						#-nan	#-nan	#-nan
AC006129.2	FGD6,VEZT	FGD6,VEZT	FGD6-001,FGD6-002,FGD6-003,FGD6-004,VEZT-001,VEZT-002,VEZT-003,VEZT-004,VEZT-005,VEZT-006,VEZT-007,VEZT-008,VEZT-009,VEZT-012,VEZT-013,VEZT-014,VEZT-015,VEZT-016,VEZT-017,VEZT-018,VEZT-019,VEZT-020,VEZT-021,VEZT-022,VEZT-023,VEZT-024,VEZT-025,VEZT-026,VEZT-027,VEZT-028,VEZT-029,VEZT-030,VEZT-031,VEZT-032,VEZT-033,VEZT-034,VEZT-035,VEZT-039,VEZT-040,VEZT-201	12	95611164	95611261	70.96	0.01	0.021	0.021	0	2	rs6538618,rs183957980	0	0.04	0.02	0.65	1.83	1.91
AC006129.2	FGD6,VEZT	FGD6,VEZT	FGD6-001,FGD6-002,FGD6-003,FGD6-004,VEZT-001,VEZT-002,VEZT-003,VEZT-004,VEZT-005,VEZT-006,VEZT-007,VEZT-008,VEZT-009,VEZT-012,VEZT-013,VEZT-014,VEZT-015,VEZT-016,VEZT-017,VEZT-018,VEZT-019,VEZT-020,VEZT-021,VEZT-022,VEZT-023,VEZT-024,VEZT-025,VEZT-026,VEZT-027,VEZT-028,VEZT-029,VEZT-030,VEZT-031,VEZT-032,VEZT-033,VEZT-034,VEZT-035,VEZT-039,VEZT-040,VEZT-201	12	95611163	95611260	70.08	0.01	0.021	0.021	0	2	rs6538618,rs183957980	0	0.04	0.02	0.65	1.83	1.91
AC006129.2	FOXN4	FOXN4	FOXN4-001,FOXN4-002	12	109747721	109747814	68.38	0.063	0.023	0	0.023						#-nan	#-nan	#-nan
AC006129.2	GALNT4,POC1B,POC1B-GALNT4,RP11-734K2.4	GALNT4,POC1B,POC1B-GALNT4,POC1B-AS1	GALNT4-001,GALNT4-201,POC1B-001,POC1B-002,POC1B-005,POC1B-006,POC1B-007,POC1B-009,POC1B-010,POC1B-011,POC1B-012,POC1B-013,POC1B-202,POC1B-GALNT4-001,RP11-734K2.4-001	12	89919718	89919837	84.35	0.018	0	0	0						#-nan	#-nan	#-nan
AC006129.2	GALNT4,POC1B,POC1B-GALNT4,RP11-734K2.4	GALNT4,POC1B,POC1B-GALNT4,POC1B-AS1	GALNT4-001,GALNT4-201,POC1B-001,POC1B-002,POC1B-005,POC1B-006,POC1B-007,POC1B-009,POC1B-010,POC1B-011,POC1B-012,POC1B-013,POC1B-202,POC1B-GALNT4-001,RP11-734K2.4-001,POC1B-GALNT4-002(*)	12	89919713	89919836	86.9	0.018	0	0	0						#-nan	#-nan	#-nan
AC006129.2	GIT2	GIT2	GIT2-016	12	110399203	110399301	66.5	0	0	0	0						#-nan	#-nan	#-nan
AC006129.2	GLT8D2,HCFC2	GLT8D2,HCFC2	GLT8D2-001,HCFC2-001,HCFC2-002,HCFC2-004	12	104458168	104458258	66.14	0.014	0	0.011	0	1	rs115289286	0.04	0.04	0.04	#-nan	#-nan	-0.51
AC006129.2	GLT8D2	GLT8D2	GLT8D2-007	12	104392037	104392140	74.3	0	0	0	0						#-nan	#-nan	#-nan
AC006129.2	GNPTAB	GNPTAB	GNPTAB-001,GNPTAB-002,GNPTAB-003,GNPTAB-009	12	102224665	102224824	116.51	0	0	0.006	0						#-nan	#-nan	#-nan
AC006129.2	HVCN1	HVCN1	HVCN1-001,HVCN1-002,HVCN1-003,HVCN1-004,HVCN1-005,HVCN1-007	12	111126869	111126995	86.53	0.032	0	0.016	0						#-nan	#-nan	#-nan
AC006129.2	IFT81	IFT81	IFT81-001,IFT81-002,IFT81-003,IFT81-004,IFT81-008	12	110562016	110562106	62.58	0.1	0.055	0.033	0						#-nan	#-nan	#-nan
AC006129.2	IFT81	IFT81	IFT81-006	12	110606792	110606887	67.31	0.11	0	0	0						#-nan	#-nan	#-nan
AC006129.2	IGF1	IGF1	IGF1-006	12	102809325	102809410	60.48	0.038	0	0.012	0	1	.	0.07	0.11	0.08	-0.9	#-nan	0.08
AC006129.2	ISCU,SART3	ISCU,SART3	ISCU-001,ISCU-002,ISCU-003,ISCU-004,ISCU-005,ISCU-006,ISCU-007,ISCU-008,ISCU-009,ISCU-012,ISCU-013,ISCU-201,SART3-001,SART3-003,SART3-004,SART3-005,SART3-006,SART3-007,SART3-017	12	108956368	108956550	130.9	0.018	0.012	0.032	0.012	6	rs2287555,rs11837563,rs10778647,rs142514490,rs10778648,rs150997281	0.18	0.12	0.12	0.87	0.44	0.46
AC006129.2	KCNC2	KCNC2	KCNC2-001,KCNC2-002,KCNC2-003,KCNC2-004,KCNC2-005,KCNC2-006,KCNC2-201,KCNC2-202	12	75604508	75604598	62.51	0.051	0	0	0						#-nan	#-nan	#-nan
AC006129.2	KCNC2	KCNC2	KCNC2-002,KCNC2-003,KCNC2-004,KCNC2-005,KCNC2-006,KCNC2-201,KCNC2-202	12	75602029	75602143	80.22	0.019	0	0	0						#-nan	#-nan	#-nan
AC006129.2	KCNC2	KCNC2	KCNC2-002,KCNC2-003,KCNC2-004,KCNC2-005,KCNC2-006,KCNC2-201,KCNC2-202	12	75602059	75602151	64.26	0.019	0	0	0						#-nan	#-nan	#-nan
AC006129.2	KCTD10	KCTD10	KCTD10-006,KCTD10-007,KCTD10-011,KCTD10-012,KCTD10-013,KCTD10-014	12	109898612	109898699	63.07	0	0	0.012	0	1	rs145217137	0.05	0.05	0.05	#-nan	#-nan	1.57
AC006129.2	KIAA1033,RP11-61E11.2	WASHC4,RP11-61E11.2	KIAA1033-001,KIAA1033-002,KIAA1033-003,KIAA1033-004,KIAA1033-012,RP11-61E11.2-001,KIAA1033-201(*)	12	105501415	105501557	100.96	0.015	0.007	0.007	0.007	1	rs2305047	#-nan	0.06	0.06	#-nan	-0.31	#-nan
AC006129.2	KITLG,RNU1-117P	KITLG,RNU1-117P	KITLG-001,KITLG-002,KITLG-004,KITLG-005,RNU1-117P-201	12	88974276	88974366	63.47	0.015	0.021	0.021	0						#-nan	#-nan	#-nan
AC006129.2	METAP2	METAP2	METAP2-001,METAP2-002,METAP2-003,METAP2-004,METAP2-006,METAP2-007,METAP2-008,METAP2-011,METAP2-012	12	95867755	95867881	90.29	0.008	0	0	0						#-nan	#-nan	#-nan
AC006129.2	METTL25	METTL25	METTL25-006	12	82764500	82764615	81.79	0.009	0	0.029	0	2	rs10778898,rs185399498	0.01	0.19	0.1	0.76	-1.09	1.27
AC006129.2	METTL25	METTL25	METTL25-008,METTL25-011	12	82866918	82867011	66.53	0.023	0	0.011	0						#-nan	#-nan	#-nan
AC006129.2	METTL25	METTL25	METTL25-009	12	82791565	82791655	65.23	0.011	0	0.011	0						#-nan	#-nan	#-nan
AC006129.2	MGAT4C	MGAT4C	MGAT4C-010	12	86995841	86996009	121.39	0.019	0	0	0						#-nan	#-nan	#-nan
AC006129.2	MGAT4C,RP11-202H2.1	MGAT4C,RP11-202H2.1	MGAT4C-011,MGAT4C-012,RP11-202H2.1-001	12	87233415	87233504	61.27	0	0.024	0.024	0	1	.	0.03	0	0.02	1.79	1.6	-0.83
AC006129.2	MIR5700	MIR5700	MIR5700-201	12	94953900	94954035	92.74	0.146	0.016	0.008	0	1	.	0	0.06	0.04	1.43	1.74	0.73
AC006129.2	MRPL42	MRPL42	MRPL42-009	12	93892480	93892567	61.34	0.026	0	0	0						#-nan	#-nan	#-nan
AC006129.2	MTERFD3	MTERFD3	MTERFD3-001,MTERFD3-002,MTERFD3-003,MTERFD3-005,MTERFD3-006,MTERFD3-007,MTERFD3-008	12	107380694	107380813	84.35	0	0	0	0	2	rs76570424,rs117461935	0.11	0.14	0.12	-0.76	#-nan	0.06
AC006129.2	MTERFD3	MTERFD3	MTERFD3-001,MTERFD3-002,MTERFD3-003,MTERFD3-005,MTERFD3-006,MTERFD3-007,MTERFD3-008	12	107380693	107380807	81.37	0	0	0	0	2	rs76570424,rs117461935	0.11	0.14	0.12	-0.76	#-nan	0.06
AC006129.2	MYBPC1	MYBPC1	MYBPC1-001,MYBPC1-002,MYBPC1-003,MYBPC1-004,MYBPC1-006,MYBPC1-007,MYBPC1-008,MYBPC1-009,MYBPC1-010,MYBPC1-011,MYBPC1-012,MYBPC1-013,MYBPC1-017,MYBPC1-018,MYBPC1-024,MYBPC1-201,MYBPC1-202	12	101985561	101985659	69.44	0.192	0.048	0.179	0	7	rs145217773,rs182305456,rs12299460,.,rs139067111,.,rs190129426	0.05	0.02	0.06	-1.67	0.76	-0.38
AC006129.2	MYBPC1	MYBPC1	MYBPC1-001,MYBPC1-002,MYBPC1-003,MYBPC1-004,MYBPC1-006,MYBPC1-007,MYBPC1-008,MYBPC1-009,MYBPC1-010,MYBPC1-011,MYBPC1-012,MYBPC1-013,MYBPC1-017,MYBPC1-018,MYBPC1-024,MYBPC1-201,MYBPC1-202	12	101985559	101985652	65.6	0.192	0.048	0.179	0	8	rs145217773,rs140627506,rs12299460,.,rs182305456,rs139067111,.,rs190129426	0.05	0.02	0.06	-1.67	0.76	-0.63
AC006129.2	MYBPC1	MYBPC1	MYBPC1-014	12	102060129	102060267	99.79	0.015	0	0	0	1	rs140157153	0.03	0.04	0.04	#-nan	#-nan	0.19
AC006129.2	MYO1H	MYO1H	MYO1H-006	12	109880886	109881080	131.78	10	0.04	0.105	0	13	rs114173479,rs191609648;rs371506127,rs117611944;rs201198234,.,rs117958161,rs189272400,rs186713647,rs138934745,rs202060415,rs189272400,rs113415374,rs117611944;rs201198234,rs34146761	0.02	0.01	0.01	1.21	1.42	1.69
AC006129.2	NAP1L1	NAP1L1	NAP1L1-001,NAP1L1-004,NAP1L1-005,NAP1L1-006,NAP1L1-007,NAP1L1-008,NAP1L1-009,NAP1L1-010,NAP1L1-011,NAP1L1-012,NAP1L1-016,NAP1L1-017,NAP1L1-018,NAP1L1-019,NAP1L1-020,NAP1L1-021,NAP1L1-022,NAP1L1-023,NAP1L1-024	12	76478347	76478452	75.17	0	0	0	0						#-nan	#-nan	#-nan
AC006129.2	NAP1L1	NAP1L1	NAP1L1-001,NAP1L1-004,NAP1L1-005,NAP1L1-006,NAP1L1-007,NAP1L1-008,NAP1L1-009,NAP1L1-010,NAP1L1-011,NAP1L1-012,NAP1L1-016,NAP1L1-017,NAP1L1-018,NAP1L1-019,NAP1L1-020,NAP1L1-021,NAP1L1-022,NAP1L1-023,NAP1L1-024	12	76478372	76478458	61.78	0	0	0	0						#-nan	#-nan	#-nan
AC006129.2	NAP1L1	NAP1L1	NAP1L1-014,NAP1L1-025,NAP1L1-027	12	76459865	76459968	67.32	0.016	0.02	0.032	0						#-nan	#-nan	#-nan
AC006129.2	NAV3	NAV3	NAV3-001,NAV3-002,NAV3-003,NAV3-201,NAV3-202	12	78224947	78225031	60.05	0.106	0.06	0.111	0	2	.,.	0.2	0.32	0.19	1.23	1.35	-0.09
AC006129.2	NAV3	NAV3	NAV3-009,NAV3-010	12	78357713	78357850	98.5	0.182	0	0.008	0	1	rs61936161	0.09	0.18	0.1	1.77	1.96	0.73
AC006129.2	NEDD1	NEDD1	NEDD1-001,NEDD1-002,NEDD1-003,NEDD1-004,NEDD1-006,NEDD1-007,NEDD1-008,NEDD1-009,NEDD1-010,NEDD1-011,NEDD1-012,NEDD1-013	12	97301062	97301226	116.3	0.013	0	0.006	0	1	rs112622130	0.17	0.18	0.17	#-nan	#-nan	0.68
AC006129.2	NFYB	NFYB	NFYB-001,NFYB-002,NFYB-003,NFYB-004	12	104531317	104531415	72.37	0.023	0	0	0						#-nan	#-nan	#-nan
AC006129.2	NR2C1	NR2C1	NR2C1-001,NR2C1-002,NR2C1-003,NR2C1-004,NR2C1-006,NR2C1-007,NR2C1-008,NR2C1-009,NR2C1-010	12	95466923	95467025	71.99	0.033	0	0.048	0	1	rs188580668	0.05	0.06	0.05	#-nan	#-nan	-0.38
AC006129.2	NT5DC3,RP11-650K20.3	NT5DC3,RP11-650K20.3	NT5DC3-001,RP11-650K20.3-001	12	104234748	104234927	126.95	0	0	0.005	0						#-nan	#-nan	#-nan
AC006129.2	NT5DC3,RP11-650K20.3	NT5DC3,RP11-650K20.3	NT5DC3-001,RP11-650K20.3-001	12	104234753	104234948	138.02	0	0	0.005	0						#-nan	#-nan	#-nan
AC006129.2	NT5DC3	NT5DC3	NT5DC3-005	12	104184497	104184598	72.58	0	0.021	0.01	0	2	rs199823036,rs57853714	0.02	0.26	0.24	#-nan	#-nan	-0.31
AC006129.2	NTN4	NTN4	NTN4-001,NTN4-002,NTN4-003,NTN4-004,NTN4-005	12	96184530	96184770	173.23	0	0.004	0	0						#-nan	#-nan	#-nan
AC006129.2	NUAK1	NUAK1	NUAK1-001	12	106532810	106532948	101.18	0	0	0.008	0	1	rs12312153	0.07	0.09	0.07	-0.9	-0.96	0.08
AC006129.2	NUDT4,RP11-486A14.2	NUDT4,RP11-486A14.2	NUDT4-001,NUDT4-002,NUDT4-003,NUDT4-004,NUDT4-006,NUDT4-007,NUDT4-008,RP11-486A14.2-001,RP11-486A14.2-002,RP11-486A14.2-003	12	93771929	93772054	87.36	0.021	0	0	0						#-nan	#-nan	#-nan
AC006129.2	NUDT4,RP11-486A14.2	NUDT4,RP11-486A14.2	NUDT4-001,NUDT4-002,NUDT4-003,NUDT4-004,NUDT4-006,NUDT4-007,NUDT4-008,RP11-486A14.2-001,RP11-486A14.2-002,RP11-486A14.2-003	12	93771922	93772024	71.82	0.021	0	0	0						#-nan	#-nan	#-nan
AC006129.2	NUDT4,RP11-486A14.2	NUDT4,RP11-486A14.2	NUDT4-001,NUDT4-002,NUDT4-003,NUDT4-004,NUDT4-006,NUDT4-007,NUDT4-008,RP11-486A14.2-001,RP11-486A14.2-002,RP11-486A14.2-003	12	93771788	93771929	101.09	0.021	0	0	0						#-nan	#-nan	#-nan
AC006129.2	NUDT4,RP11-486A14.2	NUDT4,RP11-486A14.2	NUDT4-001,NUDT4-002,NUDT4-003,NUDT4-004,NUDT4-006,NUDT4-007,NUDT4-008,RP11-486A14.2-001,RP11-486A14.2-002,RP11-486A14.2-003	12	93771805	93771995	133.14	0.021	0	0	0						#-nan	#-nan	#-nan
AC006129.2	NUP37,PARPBP	NUP37,PARPBP	NUP37-001,NUP37-002,NUP37-003,NUP37-004,NUP37-005,NUP37-008,NUP37-201,PARPBP-001,PARPBP-002,PARPBP-004,PARPBP-006,PARPBP-007,PARPBP-008,PARPBP-012,PARPBP-201,PARPBP-202	12	102513778	102513906	93.29	0.036	0.021	0.021	0						#-nan	#-nan	#-nan
AC006129.2	NUP37,PARPBP	NUP37,PARPBP	NUP37-001,NUP37-002,NUP37-003,NUP37-004,NUP37-005,NUP37-008,NUP37-201,PARPBP-001,PARPBP-002,PARPBP-004,PARPBP-006,PARPBP-007,PARPBP-008,PARPBP-012,PARPBP-201,PARPBP-202	12	102513831	102513919	63.5	0.036	0.021	0.021	0						#-nan	#-nan	#-nan
AC006129.2	NUP37,PARPBP	NUP37,PARPBP	NUP37-001,NUP37-002,NUP37-003,NUP37-004,NUP37-005,NUP37-008,NUP37-201,PARPBP-001,PARPBP-002,PARPBP-004,PARPBP-006,PARPBP-007,PARPBP-008,PARPBP-012,PARPBP-201,PARPBP-202	12	102513824	102513914	65.26	0.036	0.021	0.021	0						#-nan	#-nan	#-nan
AC006129.2	NUP37,PARPBP	NUP37,PARPBP	NUP37-001,NUP37-002,NUP37-003,NUP37-004,NUP37-005,NUP37-008,NUP37-201,PARPBP-001,PARPBP-002,PARPBP-004,PARPBP-006,PARPBP-007,PARPBP-008,PARPBP-012,PARPBP-201,PARPBP-202	12	102513672	102513763	63.05	0.036	0.021	0.021	0						#-nan	#-nan	#-nan
AC006129.2	PAH	PAH	PAH-001,PAH-002,PAH-003,PAH-010,PAH-012,PAH-013	12	103311100	103311211	80.35	0.009	0.021	0.021	0	3	rs74820934,rs181966604,rs2280616	0	0.04	0.03	-0.7	-0.54	-0.91
AC006129.2	PAWR,RP11-530C5.1	PAWR,PPP1R12A-AS2	PAWR-001,PAWR-002,PAWR-003,PAWR-004,PAWR-005,PAWR-006,PAWR-008,RP11-530C5.1-001	12	80084983	80085065	60.01	0.062	0	0.013	0						#-nan	#-nan	#-nan
AC006129.2	PAWR,RP11-530C5.1	PAWR,PPP1R12A-AS2	PAWR-001,PAWR-003,PAWR-004,PAWR-005,PAWR-006,RP11-530C5.1-001	12	80083498	80083780	202.61	0.062	0	0.013	0						#-nan	#-nan	#-nan
AC006129.2	PAWR,RP11-530C5.1	PAWR,PPP1R12A-AS2	PAWR-001,PAWR-003,PAWR-004,PAWR-005,PAWR-006,RP11-530C5.1-001	12	80083560	80083857	214.27	0.062	0	0.013	0	1	rs8176805	0.78	0.47	0.56	-0.97	1.14	0.94
AC006129.2	PHLDA1,RP11-290L1.2,RP11-290L1.3	PHLDA1,PHLDA1-DT,PHLDA1-AS1	PHLDA1-003,RP11-290L1.2-001,RP11-290L1.3-001	12	76424399	76424561	114.59	0	0	0	0						#-nan	#-nan	#-nan
AC006129.2	PHLDA1,RP11-290L1.2,RP11-290L1.3	PHLDA1,PHLDA1-DT,PHLDA1-AS1	PHLDA1-003,RP11-290L1.2-001,RP11-290L1.3-001,PHLDA1-201(*)	12	76424404	76424579	120.89	0	0	0	0						#-nan	#-nan	#-nan
AC006129.2	PLEKHG7	PLEKHG7	PLEKHG7-001	12	93131411	93131533	85.26	0.132	0.017	0.077	0						#-nan	#-nan	#-nan
AC006129.2	PLXNC1	PLXNC1	PLXNC1-001,PLXNC1-011	12	94542697	94542805	77.33	0	0	0	0						#-nan	#-nan	#-nan
AC006129.2	PPP1R12A,RP11-84G21.1	PPP1R12A,PPP1R12A-AS1	PPP1R12A-001,PPP1R12A-002,PPP1R12A-003,PPP1R12A-004,PPP1R12A-008,PPP1R12A-201,RP11-84G21.1-001	12	80329036	80329129	67.39	0.051	0	0.024	0						#-nan	#-nan	#-nan
AC006129.2	PPP1R12A,RP11-84G21.1	PPP1R12A,PPP1R12A-AS1	PPP1R12A-001,PPP1R12A-002,PPP1R12A-003,PPP1R12A-004,PPP1R12A-008,PPP1R12A-201,RP11-84G21.1-001	12	80328361	80328447	60.92	0.051	0	0.024	0	1	rs148200507	0.01	0.01	0.01	#-nan	#-nan	-0.83
AC006129.2	PPP1R12A	PPP1R12A	PPP1R12A-010	12	80228815	80228927	78.54	0.009	0	0.04	0	2	rs148390967,rs142463698	0	0	0	-0.97	#-nan	-0.97
AC006129.2	PPP1R12A	PPP1R12A	PPP1R12A-013,PPP1R12A-014,PPP1R12A-015,PPP1R12A-016,PPP1R12A-019	12	80190988	80191087	67.73	0.01	0	0	0						#-nan	#-nan	#-nan
AC006129.2	PPTC7	PPTC7	PPTC7-001	12	111020736	111020839	75.48	0	0	0	0						#-nan	#-nan	#-nan
AC006129.2	PRDM4	PRDM4	PRDM4-001,PRDM4-002,PRDM4-003,PRDM4-004	12	108154898	108155035	99.86	0.008	0.021	0.021	0	4	rs11113466,rs181617446,rs185746467,rs71454708	0.38	0.09	0.24	-0.37	-0.07	#-nan
AC006129.2	PTPRQ	PTPRQ	PTPRQ-008	12	80907103	80907190	60.48	0	0	0	0						#-nan	#-nan	#-nan
AC006129.2	RAB21	RAB21	RAB21-001	12	72148709	72148808	70.72	0	0	0	0						#-nan	#-nan	#-nan
AC006129.2	RFX4	RFX4	RFX4-002,RFX4-008,RFX4-009	12	106975841	106976007	117.15	0	0	0	0						#-nan	#-nan	#-nan
AC006129.2	RIC8B,RP11-144F15.1	RIC8B,RP11-144F15.1	RIC8B-001,RIC8B-002,RIC8B-003,RIC8B-005,RIC8B-006,RIC8B-007,RIC8B-008,RIC8B-009,RIC8B-012,RP11-144F15.1-001,RP11-144F15.1-002	12	107168373	107168460	62.2	0.012	0.012	0.013	0						#-nan	#-nan	#-nan
AC006129.2	RN7SKP172	RN7SKP172	RN7SKP172-201	12	76709354	76709486	93.29	0.008	0	0.016	0	1	rs34629072	0.09	0.19	0.13	-0.5	#-nan	0.81
AC006129.2	RN7SL88P,Metazoa_SRP.209	RN7SL88P,Metazoa_SRP.209	RN7SL88P-201,Metazoa_SRP.209-201(*)	12	96497758	96497854	66.65	0	0	0	0	3	rs4762265,rs75308406,.	0.1	0.18	0.1	1.14	1.72	0.45
AC006129.2	RNU6-1329P	RNU6-1329P	RNU6-1329P-201	12	93343173	93343341	117.18	0.019	0.006	0.019	0	3	rs7971573,rs149861680,.	0.06	0.19	0.12	-0.13	1.14	-0.64
AC006129.2	RP11-13A1.3	RP11-13A1.3	RP11-13A1.3-001	12	89702584	89702698	80.51	0	0	0.028	0	3	.,rs150553859,.	0	0	0	-1.26	-0.96	-1.21
AC006129.2	RP11-13G14.4	RP11-13G14.4	RP11-13G14.4-003	12	108869005	108869128	86.9	0	0	0	0	3	rs139456251,rs201731474,rs148747428	0.35	0.07	0.19	#-nan	#-nan	#-nan
AC006129.2	RP11-175P13.2,UHRF1BP1L	BLTP3B-DT,BLTP3B	RP11-175P13.2-001,UHRF1BP1L-001,UHRF1BP1L-002,UHRF1BP1L-004	12	100536467	100536585	85.41	0.009	0	0	0						#-nan	#-nan	#-nan
AC006129.2	RP11-175P13.2,UHRF1BP1L	BLTP3B-DT,BLTP3B	RP11-175P13.2-001,UHRF1BP1L-001,UHRF1BP1L-002,UHRF1BP1L-004	12	100536457	100536582	89.86	0.009	0	0	0						#-nan	#-nan	#-nan
AC006129.2	RP11-314D7.1	RP11-314D7.1	RP11-314D7.1-004	12	73525135	73525243	75.18	0.032	0.009	0.019	0	2	rs2362231,.	0.14	0	0.11	-0.8	-0.6	-0.77
AC006129.2	RP11-341G23.4	RP11-341G23.4	RP11-341G23.4-001,RP11-341G23.4-002	12	104162305	104162414	77.76	0.248	0.03	0.009	0.019						#-nan	#-nan	#-nan
AC006129.2	RP11-390N6.1,SYT1	RP11-390N6.1,SYT1	RP11-390N6.1-001,SYT1-003,SYT1-005,SYT1-012	12	79438493	79438590	66.24	0.032	0	0	0						#-nan	#-nan	#-nan
AC006129.2	RP11-394J1.2	RP11-394J1.2	RP11-394J1.2-001	12	96620239	96620371	88.84	0.121	0.095	0.078	0.008	1	.	0.04	0.09	0.11	-0.97	-0.9	-0.97
AC006129.2	RP11-536G4.2,SNRPF	SNRPF-DT,SNRPF	RP11-536G4.2-001,RP11-536G4.2-002,RP11-536G4.2-003,SNRPF-001,SNRPF-002,SNRPF-003,SNRPF-004	12	96252892	96253028	94.5	0.015	0.008	0.007	0	2	.,rs66876037	0.08	0.08	0.05	1.45	1.72	-0.97
AC006129.2	RP11-541G9.1	RP11-541G9.1	RP11-541G9.1-001	12	97379361	97379503	100.96	0	0.007	0.015	0.007	1	rs118075299	#-nan	0.11	0.11	#-nan	0.2	#-nan
AC006129.2	RP11-686G8.5	RP11-686G8.5	RP11-686G8.5-001(*)	12	112085689	112085776	61.32	0	0	0	0	1	rs140704464	0	0	0	#-nan	#-nan	-0.97
AC006129.2	RP11-693J15.6	RP11-693J15.6	RP11-693J15.6-001(*)	12	92027612	92027754	101.52	0	0	0	0	5	rs7302740,rs6538286,rs58174539,rs191833487,rs73202571	0.1	0.11	0.12	-0.36	1.79	0.48
AC006129.2	RP11-74K11.2	RP11-74K11.2	RP11-74K11.2-002	12	94571286	94571379	65.52	0.023	0	0.035	0	3	rs141541994,rs149177095,rs111530049	0.18	0.06	0.09	#-nan	#-nan	-0.91
AC006129.2	RP11-756G20.1	LINC02391	RP11-756G20.1-001(*)	12	92760852	92760984	95.47	0	0	0	0	2	rs71914643,rs186632445	0	0.02	0.01	-0.98	#-nan	#-nan
AC006129.2	RP11-81H3.2	LINC02882	RP11-81H3.2-005	12	74796943	74797156	150.8	0.02	0	0	0						#-nan	#-nan	#-nan
AC006129.2	RP1-34H18.1	RP1-34H18.1	RP1-34H18.1-001	12	77719276	77719567	204.12	0.007	0	0.018	0	1	rs35396318	0.07	#-nan	0.07	-0.19	#-nan	#-nan
AC006129.2	SART3	SART3	SART3-011	12	108922239	108922338	67.9	0	0	0.034	0	2	rs12425496,rs11113977	0.14	0.36	0.2	0.98	1.71	-0.38
AC006129.2	SCYL2	SCYL2	SCYL2-005	12	100674781	100674873	65.18	0.023	0	0	0	2	.,.	0.04	0.09	0.1	-0.5	-0.9	-0.61
AC006129.2	SELPLG	SELPLG	SELPLG-201(*)	12	109017388	109017636	175.94	0	0	0	0	4	rs74792300,rs201689859,rs112473865,rs139943851	0.07	0.09	0.08	-0.76	-0.96	-0.36
AC006129.2	SH2B3	SH2B3	SH2B3-003	12	111856253	111856403	108.43	0	0	0	0						#-nan	#-nan	#-nan
AC006129.2	SLC25A3	SLC25A3	SLC25A3-001,SLC25A3-002,SLC25A3-003,SLC25A3-004,SLC25A3-005,SLC25A3-006,SLC25A3-007,SLC25A3-008,SLC25A3-009,SLC25A3-013,SLC25A3-014,SLC25A3-015,SLC25A3-016,SLC25A3-201	12	98987175	98987286	77	0.009	0	0.019	0	2	rs139200797,rs151214019	0	0.01	0.01	-0.83	#-nan	-1.12
AC006129.2	SLC41A2	SLC41A2	SLC41A2-003,SLC41A2-004,SLC41A2-005,SLC41A2-006,SLC41A2-007,SLC41A2-008	12	105351696	105351805	78.84	0.031	0.02	0.02	0.02	1	rs74712239	0.11	0	0.07	#-nan	#-nan	#-nan
AC006129.2	SOCS2,SOCS2-AS1	SOCS2,SOCS2-AS1	SOCS2-005,SOCS2-006,SOCS2-007,SOCS2-008,SOCS2-009,SOCS2-010,SOCS2-011,SOCS2-012,SOCS2-013,SOCS2-AS1-001,SOCS2-AS1-002,SOCS2-AS1-004	12	93965641	93965850	148.25	0.088	0	0.009	0						#-nan	#-nan	#-nan
[truncated: 103,142 more rows]

## Sheet: Table C
LncRNA	Target gene (Ensembl release 79)	Gene symbol (Ensembl release 115)	Target transcripts	Chr	DBS-start	DBS-end	Binding affinity	Chimp sequence distance	Altai sequence distance	Denisovan sequence distance	Vindija sequence distance	SNP number	Annotated SNP
RP4-669L17.10	RHOC	RHOC	RHOC-013	1	113249743	113249813	44.93	0	0	0	0
RP4-669L17.10	RP11-70F11.8	LINC02395	RP11-70F11.8-002	12	50315263	50315345	50.96	0.013	0	0	0	1	.
RP4-669L17.10	CTD-3137H5.1	CTD-3137H5.1	CTD-3137H5.1-001	19	18553172	18553249	49.92	0	0	0	0
RP4-669L17.10	AC007339.2,AC007339.1	AC007339.2,AC007339.1	AC007339.2-201,AC007339.1-201	16	49711271	49711365	56.73	0.023	0.049	0.023	0	1	.
RP4-669L17.10	AC012123.1	AC012123.1	AC012123.1-001	18	30349507	30349598	55.63	0.037	0	0.011	0
RP4-669L17.10	RAI14	RAI14	RAI14-010	5	34653943	34654013	44.23	0	0	0	0
RP4-669L17.10	EGFL7	EGFL7	EGFL7-006,EGFL7-003	9	139560198	139560280	49.41	0	0	0	0.013
RP4-669L17.10	GALNT6,SLC4A8	GALNT6,SLC4A8	GALNT6-012,GALNT6-016,GALNT6-015,GALNT6-021,SLC4A8-002,GALNT6-009,GALNT6-008,GALNT6-018,GALNT6-020,GALNT6-001,GALNT6-013,GALNT6-010,GALNT6-011,GALNT6-005,GALNT6-017,GALNT6-007,GALNT6-006	12	51786795	51786885	57.08	0	0	0	0	2	.,rs34649668
RP4-669L17.10	PARD3	PARD3	PARD3-204,PARD3-203,PARD3-201	10	35103956	35104042	54.05	0.024	0	0	0	1	rs12355985
RP4-669L17.10	SLC9A3R1,MIR3615	NHERF1,MIR3615	MIR3615-201,SLC9A3R1-006,SLC9A3R1-001	17	72744784	72744878	58.4	0.011	0.011	0.024	0.011	2	rs745666,.
RP4-669L17.10	EFNB2	EFNB2	EFNB2-001	13	107187942	107188018	47.25	0.03	0	0	0.013
RP4-669L17.10	ZNF709	ZNF709	ZNF709-001	19	12597279	12597349	42.09	0.128	0.015	0.015	0
RP4-669L17.10	CTD-3105H18.18	CTD-3105H18.18	CTD-3105H18.18-001	19	12597285	12597353	41.36	0.132	0.015	0.015	0
RP4-669L17.10	AP000688.29	AP000688.29	AP000688.29-001	21	37477900	37477990	55.27	0.03	0.037	0.027	0
RP4-669L17.10	SCN3A	SCN3A	SCN3A-008	2	165982970	165983042	44.29	0.115	0	0	0	3	.,.,.
RP4-669L17.10	TROAP	TROAP	TROAP-009,TROAP-001,TROAP-002,TROAP-003,TROAP-004,TROAP-005,TROAP-006,TROAP-007,TROAP-016,TROAP-015,TROAP-014,TROAP-013,TROAP-011,TROAP-010	12	49714657	49714733	47.24	0.123	0	0.096	0	1	rs201273838
RP4-669L17.10	TNK2	TNK2	TNK2-010	3	195597793	195597884	58.5	0.068	0.012	0.037	0	3	rs9325405,rs192739633,.
RP4-669L17.10	RNU6-707P	RNU6-707P	RNU6-707P-201	X	48016352	48016423	43.9	0	0	0	0	2	.,.
RP4-669L17.10	MAP3K7CL	MAP3K7CL	MAP3K7CL-009	21	30492988	30493060	44.29	0.095	0.015	0.014	0	1	rs140249328
RP4-669L17.10	TAAR1	TAAR1	TAAR1-001	6	132968716	132968803	52.7	0.094	0.012	0.024	0	2	.,rs9402440
RP4-669L17.10	TTC28	TTC28	TTC28-002	22	29075865	29075952	52.7	0	0.012	0.025	0	2	.,rs142383351
RP4-669L17.10	CYFIP2	CYFIP2	CYFIP2-001,CYFIP2-002,CYFIP2-003,CYFIP2-004,CYFIP2-012,CYFIP2-006,CYFIP2-007,CYFIP2-008,CYFIP2-015,CYFIP2-202,CYFIP2-014,CYFIP2-013	5	156693075	156693169	59.52	0	0	0	0
RP4-669L17.10	ARHGDIB	ARHGDIB	ARHGDIB-006,ARHGDIB-005,ARHGDIB-008	12	15106789	15106870	53.86	0.107	0	0.013	0	2	.,rs192901708
RP4-669L17.10	TSC22D3	TSC22D3	TSC22D3-008	X	107020068	107020161	57.1	0.023	0.011	0.011	0.011	4	.,.,rs5962408,.
RP4-669L17.10	NFATC1	NFATC1	NFATC1-002	18	77154444	77154531	52.7	0.012	0	0	0
RP4-669L17.10	RP11-830F9.7,RP11-830F9.6,CBFA2T3	RP11-830F9.7,RP11-830F9.6,CBFA2T3	RP11-830F9.6-001,CBFA2T3-002,RP11-830F9.7-002,RP11-830F9.7-001,CBFA2T3-011	16	89006580	89006656	48.77	0.013	0	0	0	1	rs113041381
RP4-669L17.10	CDC42EP1	CDC42EP1	CDC42EP1-004,CDC42EP1-001	22	37956386	37956466	50.27	0.014	0	0	0
RP4-669L17.10	FANCA,SPIRE2	FANCA,SPIRE2	FANCA-005,FANCA-004,SPIRE2-009,FANCA-006,FANCA-001,FANCA-010,FANCA-003,FANCA-002,FANCA-011,SPIRE2-010,FANCA-201,FANCA-012,FANCA-032	16	89882510	89882581	43.19	0.031	0	0.03	0	2	rs148931307,rs111818726
RP4-669L17.10	Y_RNA.483	Y_RNA.483	Y_RNA.483-201	8	41660460	41660555	58.78	0.021	0.075	0.022	0	3	.,.,.
RP4-669L17.10	TBCD	TBCD	TBCD-021	17	80875671	80875752	50.59	0.026	0	0	0
RP4-669L17.10	CTD-2024F21.1	CTD-2024F21.1	CTD-2024F21.1-001	12	48158955	48159031	46.5	0	0	0	0
RP4-669L17.10	BCAS3	BCAS3	BCAS3-031,BCAS3-008	17	59234884	59234949	40.82	0.016	0	0	0
RP4-669L17.10	RAB37	RAB37	RAB37-011,RAB37-004	17	72729627	72729692	40.18	0.033	0.111	0.081	0
RP4-669L17.10	C5orf15	C5orf15	C5orf15-001,C5orf15-003,C5orf15-002	5	133303878	133303947	43.15	0.015	0	0	0
RP4-669L17.10	RP11-370P15.2	LINC02165	RP11-370P15.2-001	16	63760738	63760829	55.8	0.089	0	0	0	1	rs112618347
RP4-669L17.10	AGPAT6	GPAT4	AGPAT6-007	8	41453255	41453334	50.69	0.013	0	0	0	1	rs149261127
RP4-669L17.10	RP11-357H14.17	LINC03057	RP11-357H14.17-001	17	46724437	46724505	42.04	0.018	0.015	0.033	0	1	rs112921991
RP4-669L17.10	EHMT1	EHMT1	EHMT1-011	9	140646601	140646684	52.99	0.012	0	0.07	0	4	rs41302687,rs10867058,rs142083177,rs117256904
RP4-669L17.10	NINJ2	NINJ2	NINJ2-003	12	720377	720468	55.8	0	0.063	0.049	0	2	rs10849339,.
RP4-669L17.10	AMIGO2	AMIGO2	AMIGO2-002	12	47474552	47474616	40.95	0	0	0	0	1	rs115958440
RP4-669L17.10	Y_RNA.565	Y_RNA.565	Y_RNA.565-201	10	70262694	70262763	42.46	0.13	0.015	0.05	0.015	3	rs190751373,rs71475248,rs12764624
RP4-669L17.10	ZNF440	ZNF440	ZNF440-002,ZNF440-001,ZNF440-004	19	11922731	11922807	46.48	0	0.043	0.045	0	1	.
RP4-669L17.10	SLC34A1	SLC34A1	SLC34A1-001	5	176811963	176812024	37.8	0.018	0	0.017	0	2	rs117832432,rs201345824
RP4-669L17.10	APC2	APC2	APC2-008,APC2-006,APC2-004	19	1452261	1452342	49.78	0.042	0	0.013	0	1	rs74589976
RP4-669L17.10	MS4A6A	MS4A6A	MS4A6A-013,MS4A6A-009,MS4A6A-008,MS4A6A-010,MS4A6A-005,MS4A6A-004,MS4A6A-001,MS4A6A-016,MS4A6A-201	11	59954275	59954366	55.8	0.012	0	0.038	0	1	rs181874264
RP4-669L17.10	ARF4	ARF4	ARF4-009	3	57586125	57586201	46.48	0.013	0	0	0
RP4-669L17.10	LINC01100	LINC01100	LINC01100-001	3	159731114	159731201	54.31	0.478	0	0	0
RP4-669L17.10	DHRS9	DHRS9	DHRS9-201	2	169936456	169936536	47.88	0	0.044	0.056	0	1	.
RP4-669L17.10	TUBA1A	TUBA1A	TUBA1A-009,TUBA1A-002,TUBA1A-011	12	49585470	49585537	42.34	0.061	0.016	0	0	1	rs199680836
RP4-669L17.10	CHRAC1	CHRAC1	CHRAC1-005,CHRAC1-004,CHRAC1-003,CHRAC1-002,CHRAC1-001	8	141521872	141521945	45.36	0.015	0	0.014	0	1	rs114497687
RP4-669L17.10	KRTAP13-2	KRTAP13-2	KRTAP13-2-001	21	31746708	31746783	46.87	0.014	0	0.031	0	1	rs73201822
RP4-669L17.10	CLEC9A	CLEC9A	CLEC9A-002,CLEC9A-001	12	10180213	10180303	56.32	0.051	0.012	0.037	0	2	rs114423794,rs139554762
RP4-669L17.10	AP001505.10	AP001505.10	AP001505.10-001	21	46398415	46398479	39.69	0	0	0	0
RP4-669L17.10	KXD1	KXD1	KXD1-011,KXD1-009,KXD1-013,KXD1-014,KXD1-012	19	18670692	18670751	36.46	0.201	0	0	0	1	.
RP4-669L17.10	CNN3	CNN3	CNN3-001,CNN3-201,CNN3-002	1	95392839	95392910	44.6	0	0	0	0
RP4-669L17.10	RP11-392P7.6	GPRC5D-AS1	RP11-392P7.6-003,RP11-392P7.6-002	12	13099280	13099367	52.7	0.014	0.066	0.066	0	2	rs187696688,rs4763907
RP4-669L17.10	CCDC64	BICDL1	CCDC64-002,CCDC64-003,CCDC64-001	12	120427512	120427581	42.41	0.368	0	0	0
RP4-669L17.10	SLX1A,SLX1A-SULT1A3,BOLA2B	SLX1A,SLX1A-SULT1A3,BOLA2B	SLX1A-SULT1A3-004,SLX1A-SULT1A3-007,SLX1A-004,SLX1A-003,SLX1A-001,BOLA2B-001	16	30206317	30206392	46.13	0	0	0	0
RP4-669L17.10	TM4SF1-AS1,TM4SF1	TM4SF1-AS1,TM4SF1	TM4SF1-201,TM4SF1-AS1-002,TM4SF1-AS1-001,TM4SF1-004,TM4SF1-005,TM4SF1-001,TM4SF1-003	3	149096280	149096373	58.97	0.225	0	0.011	0	1	rs80210997
RP4-669L17.10	CTC-400I9.1	LINC01834	CTC-400I9.1-001	19	31394938	31395030	56	0.039	0.011	0.035	0	2	.,rs191574735
RP4-669L17.10	SLC2A8	SLC2A8	SLC2A8-012,SLC2A8-011,SLC2A8-006,SLC2A8-008,SLC2A8-010,SLC2A8-201,SLC2A8-005	9	130159985	130160076	55.8	0.012	0	0	0
RP4-669L17.10	SAA2-SAA4,SAA2	SAA2-SAA4,SAA2	SAA2-002,SAA2-003,SAA2-001,SAA2-SAA4-001	11	18273503	18273596	56.36	0.229	0.035	0.181	0	4	.,.,.,.
RP4-669L17.10	NHS	NHS	NHS-002	X	17736848	17736935	53.44	0.012	0	0	0	4	.,.,.,.
RP4-669L17.10	ARHGAP20	ARHGAP20	ARHGAP20-005	11	110583189	110583257	42.04	0	0	0	0
RP4-669L17.10	FOXO4	FOXO4	FOXO4-001,FOXO4-002,FOXO4-005	X	70314077	70314171	56.73	0	0.061	0.061	0	2	rs376601153,rs5981070
RP4-669L17.10	CHEK2	CHEK2	CHEK2-014	22	29126214	29126301	52.56	0.252	0.038	0.051	0.012
RP4-669L17.10	GJA3	GJA3	GJA3-001	13	20734899	20734989	55.43	0.024	0.012	0.04	0.012	3	rs181393098,rs12429245,rs139717517
RP4-669L17.10	RP11-403A21.3	RP11-403A21.3	RP11-403A21.3-001	18	21678425	21678492	42.34	0.058	0	0.032	0	5	.,.,.,.,.
RP4-669L17.10	TRAV38-2DV8,TRAC	TRAV38-2DV8,TRAC	TRAC-202,TRAV38-2DV8-001	14	22748579	22748649	42.78	0.047	0	0.015	0	1	rs185970459
RP4-669L17.10	DIO3OS	DIO3OS	DIO3OS-015,DIO3OS-201	14	102027077	102027164	52.7	0	0	0	0
RP4-669L17.10	TNIP3	TNIP3	TNIP3-003	4	122147361	122147441	51.07	0	0	0	0
RP4-669L17.10	NTM	NTM	NTM-003	11	131780592	131780678	53.2	0.012	0	0	0
RP4-669L17.10	BCAM	BCAM	BCAM-008	19	45315223	45315281	36.48	0	0	0.019	0
RP4-669L17.10	SLX1B	SLX1B	SLX1B-001,SLX1B-003	16	29466975	29467050	46.13	0	0	0	0
RP4-669L17.10	GLA	GLA	GLA-006,GLA-001	X	100662418	100662488	42.78	0	0	0	0	2	.,.
RP4-669L17.10	FBXL5	FBXL5	FBXL5-003,FBXL5-002,FBXL5-001,FBXL5-006,FBXL5-004	4	15656930	15657019	54.17	0	0	0	0
RP4-669L17.10	ZMYM3	ZMYM3	ZMYM3-002,ZMYM3-003,ZMYM3-001,ZMYM3-006,ZMYM3-007,ZMYM3-004,ZMYM3-005,ZMYM3-008	X	70475054	70475115	36.6	0.018	0	0	0
RP4-669L17.10	KHSRP	KHSRP	KHSRP-001	19	6424351	6424439	54.68	0	0	0.025	0	1	rs184792443
RP4-669L17.10	FBXO11	FBXO11	FBXO11-005,FBXO11-001	2	48132687	48132760	47.58	0	0	0.015	0
RP4-669L17.10	FIGF	VEGFD	FIGF-002	X	15368896	15368968	44.27	0.136	0.046	0.102	0	2	.,.
RP4-669L17.10	NOX1	NOX1	NOX1-004	X	100108241	100108332	56.54	0.026	0.049	0.093	0	3	rs5921671,.,.
RP4-669L17.10	MPPE1	MPPE1	MPPE1-023,MPPE1-018,MPPE1-019,MPPE1-005,MPPE1-020	18	11908979	11909071	57.83	0.011	0	0	0
RP4-669L17.10	CTC-359M8.3	CTC-359M8.3	CTC-359M8.3-001	5	145758612	145758685	45.36	0.015	0	0.03	0
RP4-669L17.10	OR10W1	OR10W1	OR10W1-001	11	58037848	58037918	43.52	0.085	0.052	0.047	0	3	rs201712445,rs200006350,.
RP4-669L17.10	AL590482.1	AL590482.1	AL590482.1-201	6	166356737	166356819	51.03	0.16	0.012	0.105	0	3	.,.,.
RP4-669L17.10	AKR1B15	AKR1B15	AKR1B15-201,AKR1B15-002	7	134247604	134247700	59.15	0.087	0.011	0.048	0	2	.,rs28524905
RP11-706O15.5	RP11-330M19.1	RP11-330M19.1	RP11-330M19.1-001	1	48281449	48281510	39.6	0	0	0	0
RP11-706O15.5	AL732375.1	AL732375.1	AL732375.1-201	10	135483614	135483686	49.98	0	0	0	0
RP11-706O15.5	TRHDE-AS1,TRHDE	TRHDE-AS1,TRHDE	TRHDE-AS1-001,TRHDE-001,TRHDE-AS1-005,TRHDE-003,TRHDE-002	12	72666452	72666515	47.06	0.034	0.016	0.016	0	2	.,rs79761722
RP11-706O15.5	PAM16,RP11-295D4.3	PAM16,RP11-295D4.3	PAM16-001,PAM16-013,PAM16-003,PAM16-005,PAM16-004,PAM16-006,PAM16-010,RP11-295D4.3-001	16	4400321	4400388	44.22	0	0	0	0
RP11-706O15.5	GPR56	ADGRG1	GPR56-076,GPR56-028,GPR56-029,GPR56-069,GPR56-032,GPR56-031,GPR56-015,GPR56-014,GPR56-017,GPR56-016,GPR56-013,GPR56-067,GPR56-068,GPR56-066,GPR56-045,GPR56-046,GPR56-008,GPR56-009	16	57673636	57673712	54.1	0.029	0	0.028	0
RP11-706O15.5	WDR78	DNAI4	WDR78-009	1	67338852	67338911	43.51	0.036	0	0.018	0
RP11-706O15.5	HK1	HK1	HK1-002	10	71098548	71098605	40.32	0	0	0.1	0	2	rs191392545,rs78220534
RP11-706O15.5	RP1-309F20.3,GNAS	RP1-309F20.3,GNAS	GNAS-029,GNAS-038,RP1-309F20.3-002,GNAS-201,GNAS-035,GNAS-021,GNAS-030,GNAS-063,GNAS-017,GNAS-015,GNAS-013,RP1-309F20.3-001,GNAS-056,GNAS-018	20	57465180	57465259	56.16	0	0	0	0
RP11-706O15.5	ARSG	ARSG	ARSG-008,ARSG-005	17	66394229	66394305	50.25	0	0	0.013	0	1	rs75888727
RP11-706O15.5	DHRS9	DHRS9	DHRS9-201	2	169936417	169936480	42.43	0	0.017	0.056	0
RP11-706O15.5	GAB2	GAB2	GAB2-002	11	78054441	78054511	51.95	0	0	0	0
RP11-706O15.5	PPIP5K1	PPIP5K1	PPIP5K1-201,PPIP5K1-002,PPIP5K1-018,PPIP5K1-024,PPIP5K1-006	15	43878900	43878949	37.39	0	0	0	0
RP11-706O15.5	NAV1	NAV1	NAV1-001	1	201617633	201617711	55.81	0.013	0	0	0
RP11-706O15.5	ORAI1	ORAI1	ORAI1-001,ORAI1-002,ORAI1-201	12	122063440	122063519	50.7	0.203	0.076	0.151	0	2	rs34181556,rs201272456
RP11-706O15.5	TSPAN5	TSPAN5	TSPAN5-003	4	99408196	99408253	39.74	0.154	0	0	0
RP11-706O15.5	RP5-1116H23.6	RP5-1116H23.6	RP5-1116H23.6-001	20	5026858	5026912	36.31	0	0	0.045	0	1	rs141660689
RP11-706O15.5	CENPL	CENPL	CENPL-008,CENPL-009,CENPL-004,CENPL-005,CENPL-006,CENPL-001,CENPL-002	1	173794558	173794630	49.37	0.014	0.032	0	0
RP11-706O15.5	GUCA1B	GUCA1B	GUCA1B-001	6	42163185	42163242	38.35	0.018	0	0	0
RP11-706O15.5	RAB6C	RAB6C	RAB6C-001	2	130735722	130735802	51.87	0	0	0.013	0
RP11-706O15.5	Y_RNA.354	Y_RNA.354	Y_RNA.354-201	2	39358228	39358290	43.88	0.188	0	0.017	0	1	.
RP11-706O15.5	PEA15	PEA15	PEA15-002	1	160176334	160176402	46.1	0.016	0	0.016	0
RP11-706O15.5	CHN1	CHN1	CHN1-008,CHN1-005,CHN1-004,CHN1-006,CHN1-001,CHN1-003	2	175870058	175870131	48.96	0	0	0.014	0	1	rs114994250
RP11-706O15.5	MIR4449,SNORA26,DANCR	MIR4449,SNORA26,DANCR	DANCR-002,DANCR-003,DANCR-004,SNORA26-201,MIR4449-201	4	53576283	53576369	59.2	0	0	0	0
RP11-706O15.5	PCDH1	PCDH1	PCDH1-004	5	141246773	141246840	47.04	0	0	0.016	0	1	.
RP11-706O15.5	ERGIC2	ERGIC2	ERGIC2-201	12	29525295	29525359	46.22	0.059	0	0	0
RP11-706O15.5	RNU7-153P	RNU7-153P	RNU7-153P-201	8	14175730	14175791	42.6	0.017	0	0.062	0	2	rs75512900,rs979951
RP11-706O15.5	RP11-87G24.6	RP11-87G24.6	RP11-87G24.6-001	17	74955414	74955477	44.52	0.154	0	0.034	0	1	rs78876812
RP11-706O15.5	STX6	STX6	STX6-001,STX6-201	1	180992178	180992235	38.35	0	0.018	0.083	0	3	.,.,.
RP11-706O15.5	RP11-413H22.2	RP11-413H22.2	RP11-413H22.2-001	16	56439955	56440006	36.12	0.227	0.043	0	0
RP11-706O15.5	KCNQ3	KCNQ3	KCNQ3-201	8	133199966	133200047	58.75	0.013	0.013	0.04	0	2	rs139014949,.
RP11-706O15.5	AC004538.3	AC004538.3	AC004538.3-004,AC004538.3-001	7	11238260	11238324	47.88	0.199	0.072	0.199	0	4	.,.,rs62438688,.
RP11-706O15.5	LINC01413	LINC01413	LINC01413-001	15	57611050	57611108	41.61	0.019	0	0.018	0
RP11-706O15.5	RP11-93G5.1	LINC02334	RP11-93G5.1-001	13	38505748	38505829	54.67	0.013	0	0.013	0	1	rs9603284
RP11-706O15.5	HDAC7	HDAC7	HDAC7-008	12	48184214	48184296	55.9	0	0	0.027	0	2	rs192539437,rs184397565
RP11-706O15.5	RPH3AL	RPH3AL	RPH3AL-017	17	156566	156639	49.68	0.095	0	0.05	0	2	rs57300640,rs113657179
RP11-706O15.5	AC004009.3	AC004009.3	AC004009.3-001	7	27399058	27399115	41.17	0	0	0.018	0	2	rs202219915,rs17429177
RP11-706O15.5	TCTE1	TCTE1	TCTE1-002	6	44253609	44253663	37.91	0.019	0.019	0.04	0.019	2	rs324142,rs2297335
RP11-706O15.5	RP11-190A12.7,CFAP45	RP11-190A12.7,CFAP45	CFAP45-005,RP11-190A12.7-004,RP11-190A12.7-005,RP11-190A12.7-001,RP11-190A12.7-002,RP11-190A12.7-003	1	159843624	159843682	43.07	0	0	0.062	0	1	.
RP11-706O15.5	RP5-1065P14.2	LINC02814	RP5-1065P14.2-001	1	229232611	229232679	47.46	0	0	0.033	0
RP11-706O15.5	CLIC5	CLIC5	CLIC5-001	6	45872391	45872466	54.31	0.03	0.014	0.014	0
RP11-706O15.5	PHYH	PHYH	PHYH-004,PHYH-006,PHYH-001,PHYH-002,PHYH-003	10	13340726	13340780	38.45	0.028	0.019	0.019	0	1	rs148994056
RP11-706O15.5	KRT71	KRT71	KRT71-001	12	52948374	52948454	58.25	0.013	0	0	0
RP11-706O15.5	CUL9	CUL9	CUL9-016,CUL9-007	6	43185913	43185971	38.76	0	0	0.018	0	1	rs141163187
RP11-706O15.5	ZNF771	ZNF771	ZNF771-001,ZNF771-201	16	30419407	30419485	52.63	0	0	0.013	0
RP11-706O15.5	LINC01483	LINC01483	LINC01483-005,LINC01483-003,LINC01483-001	17	67588974	67589052	54.18	0.103	0.093	0.042	0
RP11-706O15.5	PXDN	PXDN	PXDN-003,PXDN-015,PXDN-012,PXDN-014	2	1683559	1683617	38.76	0	0	0	0
RP11-706O15.5	ZNF710	ZNF710	ZNF710-001,ZNF710-004	15	90545116	90545200	55.88	0	0	0	0
RP11-706O15.5	COL5A1-AS1	COL5A1-AS1	COL5A1-AS1-001	9	137546469	137546565	59.15	0	0	0	0
RP11-706O15.5	CNTNAP1,CCR10	CNTNAP1,CCR10	CCR10-001,CNTNAP1-002,CCR10-003,CCR10-002,CNTNAP1-001	17	40834600	40834670	46.23	0.031	0	0.051	0	2	rs12947031,rs28605954
RP11-706O15.5	ASIP	ASIP	ASIP-001	20	32846549	32846612	43.88	0.103	0	0	0	2	rs535803413;rs72280051,.
RP11-706O15.5	BEX5	BEX5	BEX5-001	X	101413082	101413150	48.82	0.039	0.057	0.31	0	3	rs367937397,rs201022417,rs190124018
RP11-706O15.5	CTC-525D6.5	CTC-525D6.5	CTC-525D6.5-001	19	29938399	29938457	37.62	0.054	0	0	0
RP11-706O15.5	TVP23A	TVP23A	TVP23A-201,TVP23A-005,TVP23A-004,TVP23A-007,TVP23A-006,TVP23A-001,TVP23A-009,TVP23A-008	16	10914295	10914356	40.39	0.259	0.035	0.017	0
RP11-706O15.5	SRSF5	SRSF5	SRSF5-019	14	70234459	70234528	43.85	0.015	0	0	0
RP11-706O15.5	NFKBIE	NFKBIE	NFKBIE-001,NFKBIE-002,NFKBIE-201,NFKBIE-004	6	44233500	44233576	55.63	0.029	0	0.045	0	1	rs116461215
RP11-706O15.5	RP11-383C6.2	LINC02626	RP11-383C6.2-001	10	116752882	116752948	47.09	0	0	0	0	1	rs113801750
RP11-706O15.5	MIA2	MIA2	MIA2-004	14	39699485	39699540	39.42	0	0	0	0
RP11-706O15.5	RBM19	RBM19	RBM19-006	12	114299320	114299376	39.06	0	0	0.044	0	1	rs114367378
RP11-706O15.5	TRAF3IP3	TRAF3IP3	TRAF3IP3-003,TRAF3IP3-017,TRAF3IP3-006,TRAF3IP3-016,TRAF3IP3-015	1	209938554	209938604	36.35	0	0.096	0.197	0	3	.,.,rs144054319
RP11-706O15.5	RP1-170O19.17	RP1-170O19.17	RP1-170O19.17-001	7	27280728	27280786	41.04	0.018	0	0.018	0	2	rs149246365,rs548834366
RP11-706O15.5	GATA4	GATA4	GATA4-003,GATA4-004	8	11535514	11535565	36.79	0	0.194	0.049	0
RP11-706O15.5	PAQR9	PAQR9	PAQR9-001	3	142685789	142685860	50.98	0.132	0	0.015	0	1	rs141334022
RP11-706O15.5	TM2D3	TM2D3	TM2D3-016,TM2D3-013,TM2D3-009,TM2D3-012,TM2D3-004,TM2D3-005,TM2D3-006,TM2D3-010,TM2D3-011,TM2D3-001,TM2D3-002,TM2D3-003	15	102192233	102192298	42.12	0.036	0	0.051	0	3	.,rs150134567,rs13329495
RP11-706O15.5	RP11-215A19.2,MTNR1A	RP11-215A19.2,MTNR1A	MTNR1A-001,RP11-215A19.2-002	4	187476617	187476687	42.78	0.015	0	0.032	0
RP11-706O15.5	RP11-554F20.1	RP11-554F20.1	RP11-554F20.1-001	9	102581007	102581089	55.9	0.012	0	0	0
RP11-706O15.5	RP11-371A19.2	C10orf67-AS1	RP11-371A19.2-001	10	23633184	23633265	57.89	0	0	0.013	0
RP11-706O15.5	MIR5089	MIR5089	MIR5089-201	17	45049611	45049691	57.46	0.028	0	0	0
RP11-706O15.5	TMEM135	TMEM135	TMEM135-007	11	87026174	87026232	43.65	0.121	0	0	0
RP11-706O15.5	MAST2	MAST2	MAST2-007	1	46424167	46424243	55.63	0.029	0	0	0
RP11-706O15.5	H1FOO	H1-8	H1FOO-001	3	129259293	129259353	39.2	0.179	0	0.056	0	2	rs60184041,.
RP11-706O15.5	MORN5	MORN5	MORN5-003,MORN5-002	9	124926495	124926568	51.84	0.014	0.014	0.049	0	3	rs5900511,rs113207585,rs75414089
RP11-706O15.5	FRMD4A	FRMD4A	FRMD4A-010,FRMD4A-011	10	13697739	13697800	40.8	0	0.017	0.017	0.017	1	rs150274719
RP11-706O15.5	GS1-421I3.2	RHOXF1P1	GS1-421I3.2-001	X	119150491	119150544	38.02	0.021	0	0	0	1	.
RP11-706O15.5	LETMD1	LETMD1	LETMD1-028,LETMD1-029,LETMD1-015,LETMD1-004,LETMD1-005,LETMD1-006,LETMD1-018,LETMD1-026,LETMD1-027,LETMD1-024,LETMD1-020,LETMD1-022,LETMD1-034,LETMD1-025,LETMD1-019	12	51439261	51439313	37.06	0	0	0	0
RP11-706O15.5	PAN3	PAN3	PAN3-003	13	28813295	28813354	37.63	0.137	0.057	0.08	0
RP11-706O15.5	RP11-335O13.8	ADORA1-AS1	RP11-335O13.8-001	1	203124130	203124197	46.2	0.024	0.052	0.015	0	1	.
RP11-706O15.5	RP3-428A13.2	RP3-428A13.2	RP3-428A13.2-001	X	126523270	126523324	38.22	0	0	0.019	0	2	rs143799999,.
RP11-706O15.5	GSN	GSN	GSN-001	9	124062583	124062647	46.22	0	0	0	0
RP11-706O15.5	ACSBG1	ACSBG1	ACSBG1-007	15	78508026	78508091	45.36	0.115	0	0.033	0	1	.
RP11-706O15.5	RNASE9	RNASE9	RNASE9-201	14	21025455	21025514	41.75	0	0	0	0
RP11-706O15.5	DACH1	DACH1	DACH1-201,DACH1-002,DACH1-001,DACH1-202	13	72439903	72439980	51.46	0	0	0	0
RP11-706O15.5	KSR2	KSR2	KSR2-001,KSR2-201	12	118406405	118406466	43.8	0	0	0.017	0
RP11-706O15.5	DEFB121	DEFB121	DEFB121-001	20	30002039	30002100	42.84	0.037	0	0	0
RP11-706O15.5	RP11-376M2.2	RP11-376M2.2	RP11-376M2.2-001	17	41129658	41129726	46.78	0.349	0.015	0.015	0	1	rs62076388
RP11-706O15.5	Metazoa_SRP.295	Metazoa_SRP.295	Metazoa_SRP.295-201	15	82968511	82968562	36.79	0	0	0	0
RP11-706O15.5	B3GNT6	B3GNT6	B3GNT6-001,B3GNT6-003	11	76743678	76743750	45.74	0	0.082	0.17	0	5	.,.,rs190804542,.,.
RP11-706O15.5	RP11-597K23.2	LINC01583	RP11-597K23.2-002,RP11-597K23.2-003	15	82380644	82380707	41.81	0.056	0.016	0.036	0.016	1	rs72749503
RP11-706O15.5	AL050316.1	AL050316.1	AL050316.1-201	20	51677461	51677527	45.78	0.016	0.016	0	0.016
RP11-706O15.5	SCTR	SCTR	SCTR-001	2	120280972	120281035	44.93	0.017	0.016	0.016	0.016	1	rs187720928
RP11-706O15.5	RNU6-777P	RNU6-777P	RNU6-777P-201	1	12139922	12139978	37.94	0.018	0	0.018	0	1	rs111829649
RP11-706O15.5	RNU6-131P	RNU6-131P	RNU6-131P-201	17	42214451	42214505	38.98	0.025	0	0	0	1	.
RP11-706O15.5	RP11-167N5.5	RP11-167N5.5	RP11-167N5.5-001	9	131767247	131767308	43.2	0	0	0	0
RP11-706O15.5	ZNF626	ZNF626	ZNF626-202	19	21049131	21049191	46.06	0	0	0.017	0	1	rs141016943
RP11-706O15.5	NOTCH4	NOTCH4	NOTCH4-002	6	32190644	32190719	53.68	0	0	0	0
RP11-706O15.5	DCUN1D2	DCUN1D2	DCUN1D2-010	13	114118056	114118129	48.31	0	0.116	0.032	0	1	rs201530238;rs71697221
RP11-706O15.5	TMCO3	TMCO3	TMCO3-004	13	114151664	114151748	57.53	0	0	0.013	0	1	rs116624284
RP11-706O15.5	RP11-116D17.5	RP11-116D17.5	RP11-116D17.5-001	12	115772609	115772664	40.3	0.02	0	0	0	1	rs190285682
RP11-706O15.5	RP1-90K10.4	RP1-90K10.4	RP1-90K10.4-001	6	36911381	36911433	38.11	0	0	0	0
RP11-706O15.5	CALY	CALY	CALY-001	10	135152500	135152563	40.7	0.034	0	0	0
RP11-706O15.5	TRABD2A	TRABD2A	TRABD2A-004,TRABD2A-003	2	85137056	85137135	57.02	0.013	0	0	0
RP11-706O15.5	AC093901.1	THORLNC	AC093901.1-002,AC093901.1-003,AC093901.1-001	2	118946011	118946069	39.9	0	0	0	0
RP11-706O15.5	FOXA2	FOXA2	FOXA2-001,FOXA2-002	20	22565270	22565327	39.48	0.212	0.019	0.14	0	2	.,.
RP11-706O15.5	PCDH15	PCDH15	PCDH15-025	10	57386728	57386801	53.44	0.014	0	0	0
RP11-706O15.5	C17orf50,RP1-161P9.5	C17orf50,RP1-161P9.5	RP1-161P9.5-001,C17orf50-002,C17orf50-003,C17orf50-001	17	34087469	34087526	41.74	0.064	0.018	0.04	0.018	1	rs78518141
RP11-706O15.5	ZNF705G	ZNF705G	ZNF705G-001	8	7242838	7242896	39.9	0	0	0	0
RP11-706O15.5	SETBP1	SETBP1	SETBP1-001	18	42260313	42260365	36.02	0	0	0.02	0	1	rs117763335
RP11-706O15.5	LPHN3	ADGRL3	LPHN3-019,LPHN3-003,LPHN3-001	4	62065689	62065768	56.23	0.013	0.013	0.013	0	1	rs7664381
RP11-706O15.5	RP11-24D15.1	RP11-24D15.1	RP11-24D15.1-002,RP11-24D15.1-001	15	74167608	74167670	44.5	0.094	0.017	0.017	0	4	.,.,.,rs7166181
RP11-706O15.5	KTN1-AS1,KTN1	KTN1-AS1,KTN1	KTN1-AS1-003,KTN1-AS1-002,KTN1-AS1-001,KTN1-AS1-004,KTN1-001,KTN1-002,KTN1-005,KTN1-004,KTN1-014,KTN1-015	14	56046959	56047022	40.56	0	0.017	0	0
RP11-706O15.5	CTD-2552K11.2	CTD-2552K11.2	CTD-2552K11.2-001,CTD-2552K11.2-002	8	124624414	124624480	48.4	0.032	0.05	0.078	0	3	.,.,rs12545233
RP11-706O15.5	C15orf41	CDIN1	C15orf41-012	15	36995515	36995600	56.23	0	0.012	0	0
RP11-706O15.5	C9orf114	SPOUT1	C9orf114-003	9	131586536	131586607	45.31	0.02	0.015	0.03	0	1	rs77836620
RP11-706O15.5	HSP90AA1	HSP90AA1	HSP90AA1-006,HSP90AA1-007,HSP90AA1-003,HSP90AA1-009	14	102551253	102551316	45.16	0.017	0	0.016	0	2	rs55783428,rs3832931
RP11-706O15.5	PRRX1	PRRX1	PRRX1-005,PRRX1-002,PRRX1-001,PRRX1-008	1	170633209	170633264	39.19	0	0.062	0.062	0	1	.
RP11-706O15.5	LIMS2	LIMS2	LIMS2-003	2	128439723	128439803	55.06	0.014	0.041	0.073	0	1	.
RP11-706O15.5	ERBB2	ERBB2	ERBB2-201	17	37850485	37850563	50.31	0	0.058	0.112	0	2	.,.
RP11-706O15.5	RNU7-181P	RNU7-181P	RNU7-181P-201	8	131018874	131018945	46.02	0.231	0.047	0.104	0	3	rs59417464,rs74186535,rs113311837
RP11-706O15.5	PXN	PXN	PXN-002,PXN-017,PXN-016,PXN-011,PXN-005,PXN-018,PXN-201,PXN-001	12	120706749	120706820	50.27	0.024	0	0	0
RP11-706O15.5	UTP20	UTP20	UTP20-001,UTP20-002	12	101672684	101672744	42.42	0.045	0.018	0.067	0
RP11-706O15.5	VSIG10	VSIG10	VSIG10-012	12	118561620	118561675	36.98	0.043	0.113	0.041	0	1	rs79967797
RP11-706O15.5	PIP5KL1	PIP5KL1	PIP5KL1-001,PIP5KL1-011,PIP5KL1-010,PIP5KL1-012	9	130688417	130688495	51.86	0.013	0.027	0	0	1	rs550014426
RP11-706O15.5	DVL2	DVL2	DVL2-010,DVL2-003,DVL2-001,DVL2-004,DVL2-009,DVL2-008	17	7139452	7139509	40.04	0.018	0	0.018	0	1	rs201628753
RP11-706O15.5	RP5-908M14.5	RP5-908M14.5	RP5-908M14.5-004,RP5-908M14.5-003	20	61000981	61001053	45.7	0.151	0.031	0	0
RP11-706O15.5	RBAK	RBAK	RBAK-201,RBAK-001	7	5083986	5084047	43.2	0	0	0	0
RP11-706O15.5	WTAP	WTAP	WTAP-004,WTAP-001,WTAP-202,WTAP-201,WTAP-002	6	160145904	160145967	45.79	0	0	0	0
RP11-706O15.5	MORN5	MORN5	MORN5-001	9	124922822	124922883	44.4	0.035	0	0.037	0
RP11-706O15.5	CEP170	CEP170	CEP170-019	1	243418419	243418477	36.48	0	0	0	0
RP11-706O15.5	PVT1_3.1,PVT1	PVT1_3.1,PVT1	PVT1-004,PVT1-015,PVT1-014,PVT1-013,PVT1_3.1-201	8	128901287	128901368	57.89	0	0	0	0	1	rs113371797
RP11-706O15.5	ABL1	ABL1	ABL1-001	9	133711052	133711140	59.09	0.037	0.091	0.038	0	3	rs181770516,rs138966897,rs200555400
RP11-706O15.5	RP1-34H18.1	RP1-34H18.1	RP1-34H18.1-001	12	77719567	77719630	43.88	0	0	0.016	0	1	rs60172725
RP11-706O15.5	CASQ1	CASQ1	CASQ1-002	1	160163741	160163814	46.8	0.022	0	0	0
RP11-706O15.5	B3GNTL1	B3GNTL1	B3GNTL1-006,B3GNTL1-010,B3GNTL1-002,B3GNTL1-009	17	81005836	81005900	46.87	0.058	0	0	0	1	rs144285659
RP11-706O15.5	RP11-8L8.2	LINC02285	RP11-8L8.2-001	14	101584181	101584248	46.86	0.032	0.032	0.072	0	1	rs73356937
RP11-706O15.5	AL845259.4	AL845259.4	AL845259.4-201	10	135480304	135480376	49.98	0	0	0	0
RP11-706O15.5	CDH22	CDH22	CDH22-201	20	44938597	44938651	37.67	0.04	0	0	0
RP11-706O15.5	SPN	SPN	SPN-001	16	29671057	29671124	48.84	0.052	0	0	0
RP11-706O15.5	Clostridiales-1.2	Clostridiales-1.2	Clostridiales-1.2-201	18	72798248	72798317	44.46	0	0	0.016	0	1	.
RP11-706O15.5	ARHGEF10L	ARHGEF10L	ARHGEF10L-004	1	17938930	17939003	52.56	0.014	0	0	0
RP11-706O15.5	CMPK1	CMPK1	CMPK1-002,CMPK1-004	1	47797703	47797791	58.29	0.025	0	0.012	0
RP11-706O15.5	CYGB	CYGB	CYGB-003	17	74530182	74530245	43.88	0.227	0.074	0.074	0	1	rs138925195
RP11-706O15.5	ARHGEF6	ARHGEF6	ARHGEF6-003,ARHGEF6-002	X	135851139	135851200	43.45	0	0	0	0	3	.,.,.
RP11-706O15.5	RP11-60L3.3	RP11-60L3.3	RP11-60L3.3-001	15	74590613	74590665	37.06	0.163	0	0.02	0
RP11-706O15.5	Y_RNA.289	Y_RNA.289	Y_RNA.289-201	18	76306840	76306905	47.3	0.051	0	0	0
RP11-706O15.5	OR6K2	OR6K2	OR6K2-001	1	158673028	158673079	37.67	0.046	0.049	0.049	0	3	.,.,.
RP11-706O15.5	TRPV1,CTNS,SHPK	TRPV1,CTNS,SHPK	TRPV1-001,CTNS-010,SHPK-001,CTNS-009,CTNS-007,CTNS-006,CTNS-005,CTNS-004,CTNS-003,CTNS-002,CTNS-001	17	3538477	3538533	41.29	0.216	0.039	0.111	0	2	rs200477119,.
RP11-706O15.5	NEIL2	NEIL2	NEIL2-001,NEIL2-004	8	11624484	11624554	48.99	0.069	0.047	0	0	1	.
RP11-706O15.5	F11	F11	F11-006,F11-007	4	187206473	187206548	49.9	0	0	0.044	0	1	rs114092227
RP11-706O15.5	PTPRM	PTPRM	PTPRM-001,PTPRM-012	18	7567192	7567260	44.07	0.015	0.015	0.031	0.015	1	rs112048995
RP11-706O15.5	PRRC2C	PRRC2C	PRRC2C-002	1	171508617	171508696	55.44	0.014	0	0.041	0	3	rs190738310,rs60015867,rs59025168
RP11-706O15.5	FGF1	FGF1	FGF1-001	5	142000918	142000970	38.63	0.02	0	0.121	0
RP11-706O15.5	IQGAP1	IQGAP1	IQGAP1-003	15	91039140	91039197	42.05	0.045	0	0.018	0
RP11-706O15.5	BTC	BTC	BTC-001	4	75721693	75721746	38.54	0.02	0.019	0.041	0.019	2	rs11733938,rs142492328
RP11-706O15.5	TMEM63C	TMEM63C	TMEM63C-005,TMEM63C-006,TMEM63C-001	14	77645428	77645500	51.55	0.014	0.014	0.046	0	2	rs71428780,rs71428781
RP11-706O15.5	ASGR2	ASGR2	ASGR2-007	17	7021773	7021842	50.11	0.086	0.086	0.015	0
RP11-706O15.5	RP11-242F24.1	LINC01672	RP11-242F24.1-003	1	6788902	6788986	54.99	0.309	0.012	0.069	0	3	rs192481929,rs185616963,rs9699592
RP11-706O15.5	RP11-20J15.3	RP11-20J15.3	RP11-20J15.3-002,RP11-20J15.3-001	10	44790590	44790682	59.67	0.011	0	0	0
RP11-706O15.5	KDM5B	KDM5B	KDM5B-007	1	202731338	202731402	47.51	0	0	0	0
RP11-706O15.5	RP11-854K16.4	RP11-854K16.4	RP11-854K16.4-001	15	21350269	21350332	43.25	0.017	0	0	0
RP11-706O15.5	NFASC	NFASC	NFASC-008,NFASC-005	1	204953472	204953536	40.95	0	0.033	0.072	0
RP11-706O15.5	RYR3	RYR3	RYR3-001,RYR3-201,RYR3-002	15	33602552	33602637	53.68	0.182	0	0	0
RP11-706O15.5	MLLT6,CTB-58E17.3,MIR4734	MLLT6,CTB-58E17.3,MIR4734	MLLT6-011,CTB-58E17.3-001,MLLT6-009,MLLT6-008,MLLT6-001,MIR4734-202,MLLT6-002	17	36861700	36861757	41.17	0	0	0	0
RP11-706O15.5	SNHG14	SNHG14	SNHG14-015	15	25294031	25294098	48.18	0	0.069	0.089	0	5	.,.,.,.,.
RP11-706O15.5	Y_RNA.623	Y_RNA.623	Y_RNA.623-201	10	132301501	132301556	39.74	0.019	0	0	0
RP11-706O15.5	LHFP	LHFPL6	LHFP-001,LHFP-002	13	40177215	40177299	54.21	0.026	0	0.012	0	1	.
RP11-706O15.5	PINX1	PINX1	PINX1-007	8	10693253	10693314	44.68	0	0	0	0
RP11-706O15.5	RP11-21L23.2	RP11-21L23.2	RP11-21L23.2-001	11	76511234	76511315	57.94	0.029	0	0.013	0
RP11-706O15.5	TREM1	TREM1	TREM1-006	6	41251687	41251740	37.49	0	0	0.041	0	1	rs7775562
RP11-706O15.5	ACIN1	ACIN1	ACIN1-008,ACIN1-009	14	23549849	23549899	38.84	0.069	0	0.074	0	1	rs200994529
RP11-706O15.5	RP11-243M5.3	RP11-243M5.3	RP11-243M5.3-001	12	131467003	131467087	59.21	0.025	0	0.025	0
RP11-706O15.5	IFT81	IFT81	IFT81-006	12	110606825	110606897	52.84	0.1	0	0	0
RP11-706O15.5	GPR144	ADGRD2	GPR144-003	9	127225173	127225246	51.84	0.093	0	0.014	0	2	rs145399583,rs10986352
RP11-706O15.5	ENTPD5,CCDC176	ENTPD5,BBOF1	ENTPD5-001,ENTPD5-003,ENTPD5-005,ENTPD5-004,ENTPD5-006,CCDC176-001,ENTPD5-008,CCDC176-005,CCDC176-004,CCDC176-006	14	74485987	74486048	38.56	0.017	0	0	0
RP11-706O15.5	NLGN3	NLGN3	NLGN3-004	X	70372548	70372609	41.62	0.017	0	0	0	1	.
RP11-706O15.5	TSHZ3	TSHZ3	TSHZ3-002,TSHZ3-001	19	31842027	31842100	51.24	0.03	0	0.014	0
RP11-706O15.5	SPSB1	SPSB1	SPSB1-003	1	9410117	9410190	46.08	0.015	0	0	0
RP11-706O15.5	MDGA2	MDGA2	MDGA2-001	14	48143971	48144056	55.44	0	0	0	0
RP11-706O15.5	LINC01224	LINC01224	LINC01224-002	19	23592819	23592877	41.04	0.018	0.018	0.058	0	1	rs640889
RP11-706O15.5	KHNYN	KHNYN	KHNYN-003,KHNYN-001,KHNYN-004	14	24896024	24896108	56.68	0.026	0	0.026	0
RP11-706O15.5	HES3	HES3	HES3-002	1	6305045	6305124	54.65	0.041	0	0.027	0	2	rs12408527,rs187358244
RP11-706O15.5	SORCS3-AS1	SORCS3-AS1	SORCS3-AS1-001	10	106427087	106427153	47.95	0	0	0.016	0	1	rs182989228
RP11-706O15.5	AREG,RP11-727M10.1	AREG,RP11-727M10.1	AREG-002,RP11-727M10.1-001,AREG-001	4	75309448	75309500	37.58	0.204	0.02	0	0
RP11-706O15.5	TMTC1	TMTC1	TMTC1-007	12	29796719	29796786	45.7	0	0.08	0.032	0	1	.
RP11-706O15.5	ZYG11B	ZYG11B	ZYG11B-201,ZYG11B-001	1	53192744	53192826	55.08	0	0	0.012	0
RP11-706O15.5	HLA-DQB1-AS1	HLA-DQB1-AS1	HLA-DQB1-AS1-001	6	32626896	32626956	41.58	0.164	0.083	0.114	0.038	4	rs4713571,rs9273382,rs4713572,rs9273384
RP11-706O15.5	SKAP2	SKAP2	SKAP2-006,SKAP2-003,SKAP2-001,SKAP2-008	7	26907197	26907283	59.2	0	0.067	0.054	0	7	rs201454639;rs213526,rs201454639;rs213526,rs199513306,rs150990964,rs150990964,.,.
RP11-706O15.5	GLB1	GLB1	GLB1-013	3	33115814	33115876	46.35	0.049	0.035	0.177	0	7	.,.,.,.,.,.,.
RP11-706O15.5	PHKG2	PHKG2	PHKG2-007,PHKG2-013	16	30760449	30760520	51.68	0	0.033	0.033	0
RP11-706O15.5	MIR3646	MIR3646	MIR3646-201	20	43033432	43033496	40.32	0.077	0.035	0.016	0.016
RP11-706O15.5	LINC00599	MIR124-1HG	LINC00599-004	8	9765198	9765250	38.11	0	0	0	0
RP11-706O15.5	RMST_9.1,RMST_8.1	RMST_9.1,RMST_8.1	RMST_8.1-201,RMST_9.1-201	12	97951833	97951899	48.4	0.016	0.016	0.034	0.016	2	rs76638151,rs11109106
RP11-706O15.5	CCDC154	CCDC154	CCDC154-002	16	1490478	1490539	43.45	0.027	0.058	0.018	0	2	.,.
RP11-706O15.5	HSPA9	HSPA9	HSPA9-011,HSPA9-010,HSPA9-008,HSPA9-001,HSPA9-003,HSPA9-002,HSPA9-005,HSPA9-004	5	137913830	137913892	44.5	0.035	0	0.035	0	2	rs142277536,rs409273
RP11-706O15.5	RP1-79C4.4	RP1-79C4.4	RP1-79C4.4-001	1	170633206	170633263	40.9	0	0.059	0.059	0	1	.
RP11-706O15.5	CCDC33	CCDC33	CCDC33-003	15	74557691	74557754	46.18	0.102	0	0.016	0
RP11-706O15.5	RP5-907D15.3	RP5-907D15.3	RP5-907D15.3-001	20	57168568	57168628	42.77	0.088	0	0	0
RP11-706O15.5	FAN1	FAN1	FAN1-007	15	31222043	31222104	42.23	0	0.058	0.037	0
RP11-706O15.5	SHROOM3	SHROOM3	SHROOM3-007	4	77473748	77473812	44.3	0	0	0	0	1	rs151305640
RP11-706O15.5	UBTF	UBTF	UBTF-011	17	42291317	42291398	55.48	0	0	0.013	0	1	rs148450231
RP11-706O15.5	RP11-15I11.3	LINC02608	RP11-15I11.3-002	1	212402636	212402697	44.68	0.017	0	0.017	0
RP11-706O15.5	RP11-108E14.1	RP11-108E14.1	RP11-108E14.1-001,RP11-108E14.1-002	8	20557611	20557686	52.92	0.028	0	0.031	0
RP11-706O15.5	TRIM25	TRIM25	TRIM25-201,TRIM25-001	17	54993910	54993983	51.97	0	0	0.029	0	1	.
RP11-706O15.5	ACSL6	ACSL6	ACSL6-007	5	131322607	131322677	45.54	0	0	0.032	0	2	rs10059315,rs191112790
RP11-706O15.5	PRODH2	PRODH2	PRODH2-006,PRODH2-007	19	36299997	36300055	41.9	0.242	0	0.039	0	3	rs368574690,rs4045926,rs2312051
RP11-706O15.5	KCTD15	KCTD15	KCTD15-010	19	34286567	34286637	47.61	0.015	0	0.015	0	1	rs187845213
RP11-706O15.5	RP11-8P11.3	INSYN1-AS1	RP11-8P11.3-001	15	74061715	74061784	51.5	0	0.016	0	0
RP11-706O15.5	PCMTD2	PCMTD2	PCMTD2-006	20	62901180	62901250	44.23	0.08	0.08	0.13	0	1	rs201721005
RP11-706O15.5	CHAC1	CHAC1	CHAC1-003	15	41244095	41244155	43.03	0	0.018	0.038	0.018
RP11-706O15.5	DHX57	DHX57	DHX57-002,DHX57-007	2	39095389	39095444	36.43	0.019	0	0.066	0	4	rs61757604,rs199521315,.,rs150741789
RP11-706O15.5	RP11-87C12.5,BCL7A	RP11-87C12.5,BCL7A	RP11-87C12.5-001,BCL7A-001,BCL7A-003,BCL7A-002	12	122456941	122457013	53.72	0	0	0.014	0	1	rs2009257
RP11-706O15.5	APBA2	APBA2	APBA2-011	15	29337232	29337286	38.77	0	0	0	0
RP11-706O15.5	SVIL	SVIL	SVIL-008	10	29798201	29798282	56.3	0.089	0.026	0.04	0	2	.,.
RP11-706O15.5	SSBP3	SSBP3	SSBP3-008,SSBP3-004	1	54792886	54792938	37.23	0	0	0.021	0
RP11-706O15.5	AL132709.2,MIR376C,MIR376B,MIR300,MIR376A1,MIR654	AL132709.2,MIR376C,MIR376B,MIR300,MIR376A1,MIR654	MIR376C-201,MIR654-201,AL132709.2-201,MIR376B-201,MIR376A1-201,MIR300-201	14	101504615	101504675	44.55	0	0.122	0	0
RP11-706O15.5	EFCAB13,RP11-290H9.4	EFCAB13,EFCAB13-DT	EFCAB13-004,RP11-290H9.4-001	17	45403811	45403865	39.86	0	0	0	0
RP11-706O15.5	TCF4	TCF4	TCF4-007,TCF4-029,TCF4-025,TCF4-026,TCF4-027	18	53253347	53253402	39.74	0	0	0	0
RP11-706O15.5	GP1BA	GP1BA	GP1BA-201,GP1BA-001	17	4833996	4834048	37.58	0	0	0.042	0	1	rs116744370
RP11-706O15.5	LOXL2	LOXL2	LOXL2-004,LOXL2-006	8	23189989	23190076	58.69	0	0.071	0.012	0
RP11-706O15.5	TG	TG	TG-005	8	133974359	133974413	38.45	0.02	0	0.045	0	1	rs2741219
RP11-706O15.5	TFAP2B	TFAP2B	TFAP2B-003	6	50788152	50788210	43.07	0.037	0	0	0
RP11-706O15.5	HOXA9,HOXA10	HOXA9,HOXA10	HOXA10-001,HOXA9-006,HOXA10-004,HOXA10-005,HOXA10-006,HOXA10-201	7	27215737	27215809	49.27	0	0	0.014	0
RP11-706O15.5	ZNF705B	ZNF705B	ZNF705B-001	8	7784041	7784099	41.04	0	0	0	0
RP11-706O15.5	RP11-627G18.4	RP11-627G18.4	RP11-627G18.4-001	18	19792103	19792166	39.94	0.055	0.206	0.082	0
RP11-706O15.5	MKI67	MKI67	MKI67-002,MKI67-201,MKI67-001,MKI67-004	10	129927012	129927080	48.82	0.135	0	0.109	0	3	.,.,.
RP11-706O15.5	POLE	POLE	POLE-026,POLE-024,POLE-003	12	133210874	133210935	44.68	0	0	0.035	0
RP11-706O15.5	AC007349.7	AC007349.7	AC007349.7-001	7	36879345	36879406	40.39	0.097	0	0.017	0	1	rs13232495
RP11-706O15.5	CRIP2	CRIP2	CRIP2-004	14	105944006	105944099	58.21	0.054	0.114	0.053	0.023
RP11-706O15.5	RP11-244H18.3	RP11-244H18.3	RP11-244H18.3-001	14	20106730	20106808	55.02	0.014	0	0	0
RP11-706O15.5	ANKRD30B	ANKRD30B	ANKRD30B-002	18	14748053	14748129	48.75	0.135	0	0.029	0	2	rs9303850,rs183005750
RP11-706O15.5	GOLGA8B	GOLGA8B	GOLGA8B-011	15	34846756	34846826	46.92	0.036	0	0	0
RP11-706O15.5	ALDH1A3	ALDH1A3	ALDH1A3-007	15	101415869	101415925	36.27	0.072	0	0	0
RP11-706O15.5	RELT	RELT	RELT-006,RELT-007,RELT-001,RELT-002	11	73088307	73088375	44.75	0.015	0	0.164	0
RP11-706O15.5	NOP56	NOP56	NOP56-009	20	2629574	2629631	38.35	0	0	0.043	0	3	.,.,.
RP11-706O15.5	ACACB	ACACB	ACACB-008	12	109626016	109626094	57.28	0	0.027	0	0
RP11-706O15.5	OPTN	OPTN	OPTN-009,OPTN-006	10	13138104	13138178	55.35	0.064	-1	-1	0	1	rs642347
RP11-706O15.5	GREB1	GREB1	GREB1-002	2	11679124	11679174	37.35	0.047	0.021	0.044	0
RP11-706O15.5	CXXC1,MBD1	CXXC1,MBD1	MBD1-014,CXXC1-011,CXXC1-016,MBD1-026,MBD1-007,MBD1-016,MBD1-003,MBD1-011,MBD1-019	18	47809496	47809566	48.99	0	0	0.015	0	1	rs138236260
RP11-706O15.5	BCCIP,UROS	BCCIP,UROS	BCCIP-001,BCCIP-003,BCCIP-002,BCCIP-005,BCCIP-004,UROS-004,UROS-006,UROS-001,UROS-003	10	127513428	127513498	48.3	0	0	0.055	0	3	rs150532542,rs116463624,rs76772595
RP11-706O15.5	RP11-367F23.2	LINC02957	RP11-367F23.2-001	9	93759582	93759648	42.51	0	0.091	0.101	0	6	rs595667,rs201905489,.,rs145885732,.,.
RP11-706O15.5	RP11-122K13.14	RP11-122K13.14	RP11-122K13.14-001	10	135137514	135137573	41.75	0.041	0	0.064	0	1	rs184418693
RP11-706O15.5	LHX1	LHX1	LHX1-004	17	35297434	35297504	49.84	0.015	0	0	0
RP11-706O15.5	RP11-340L3.1	RP11-340L3.1	RP11-340L3.1-001	14	33349257	33349341	59.21	0.121	0.072	0.026	0	2	rs142457674,.
RP11-706O15.5	PCDH1	PCDH1	PCDH1-002,PCDH1-003,PCDH1-001	5	141259159	141259225	45.78	0.032	0	0.016	0	1	rs201100100
RP11-706O15.5	MYZAP	MYZAP	MYZAP-003	15	57926464	57926521	41.47	0.018	0	0.018	0	1	rs67536281
RP11-706O15.5	ZNF98	ZNF98	ZNF98-005,ZNF98-004	19	22716722	22716789	48.84	0.016	0	0	0
RP11-706O15.5	GLA,HNRNPH2	GLA,HNRNPH2	GLA-006,GLA-007,GLA-004,GLA-005,HNRNPH2-001	X	100662380	100662453	49.68	0.014	0	0	0
RP11-706O15.5	CAPN2	CAPN2	CAPN2-002,CAPN2-003	1	223942992	223943066	49.45	0	0	0	0
RP11-706O15.5	PPFIBP1	PPFIBP1	PPFIBP1-015	12	27752450	27752511	44.68	0.017	0	0.017	0
RP11-706O15.5	RP11-507B12.1	RP11-507B12.1	RP11-507B12.1-002	15	62009008	62009059	36.64	0.139	0.043	0.067	0
RP11-706O15.5	RP11-74K11.2	RP11-74K11.2	RP11-74K11.2-002	12	94570930	94571017	55.19	0.279	0.039	0.153	0	3	rs200258571,.,.
RP11-706O15.5	SH3GL3	SH3GL3	SH3GL3-004,SH3GL3-006	15	84276590	84276645	37.26	0.07	0.07	0	0	1	.
RP11-706O15.5	PLA2G1B	PLA2G1B	PLA2G1B-001,PLA2G1B-003,PLA2G1B-002	12	120764370	120764425	40.3	0.023	0.07	0.02	0	1	.
RP11-706O15.5	ANTXRL	ANTXRL	ANTXRL-004	10	47669708	47669773	41.47	0.051	0	0.016	0	1	rs190576638
RP11-706O15.5	ZNF771	ZNF771	ZNF771-002,ZNF771-003	16	30419417	30419487	47.74	0	0	0.015	0
RP11-706O15.5	C17orf85	NCBP3	C17orf85-001	17	3750356	3750425	48.72	0	0	0.034	0	2	rs146467293,rs11078468
RP11-706O15.5	GPR56	ADGRG1	GPR56-022	16	57678871	57678964	59.14	0.053	0	0.035	0	3	rs60142697,.,rs183234018
RP11-706O15.5	PTPN2	PTPN2	PTPN2-001,PTPN2-007,PTPN2-004	18	12884172	12884237	44.71	0	0	0	0
RP11-706O15.5	Metazoa_SRP.297	Metazoa_SRP.297	Metazoa_SRP.297-201	14	55750686	55750761	46.87	0.046	0.014	0.048	0	2	rs147268834,rs75274058
RP11-706O15.5	RP5-837J1.4	RP5-837J1.4	RP5-837J1.4-001	17	33403699	33403753	37.91	0	0.1	0.019	0
RP11-706O15.5	AC098612.1	AC098612.1	AC098612.1-201	8	34826097	34826173	53.34	0.029	0	0.013	0
RP11-706O15.5	ZNF316	ZNF316	ZNF316-003	7	6682129	6682205	54	0	0	0	0
RP11-706O15.5	PSPC1	PSPC1	PSPC1-002,PSPC1-001	13	20356769	20356831	41.41	0	0	0	0
RP11-706O15.5	CD302	CD302	CD302-001,CD302-002	2	160654660	160654724	43.47	0.017	0	0	0
RP11-706O15.5	STATH	STATH	STATH-001,STATH-003,STATH-004,STATH-005,STATH-006,STATH-201	4	70859018	70859075	41.74	0	0.018	0.038	0.018	1	rs148090797
RP11-706O15.5	RP11-279F6.1,RP11-253M7.4	DRAIC,LINC02896	RP11-279F6.1-005,RP11-279F6.1-001,RP11-253M7.4-001,RP11-279F6.1-002	15	69755997	69756063	48.4	0.034	0	0.016	0	1	rs150858563
RP11-706O15.5	RASSF5	RASSF5	RASSF5-008,RASSF5-006,RASSF5-005	1	206754926	206754993	45.7	0.053	0	0.032	0	3	rs200979291,.,.
RP11-706O15.5	BCAS4	BCAS4	BCAS4-003,BCAS4-005,BCAS4-004,BCAS4-006	20	49412954	49413017	41.81	0.245	0	0	0	1	.
RP11-706O15.5	RP11-322N21.2,RP4-533D7.6	P3R3URF,P3R3URF-PIK3R3	RP4-533D7.6-001,RP11-322N21.2-001	1	46645412	46645487	52.16	0.014	0	0	0
RP11-706O15.5	HDAC7	HDAC7	HDAC7-019	12	48215277	48215347	44.16	0	0	0.015	0	1	rs76407956
RP11-706O15.5	PBX1	PBX1	PBX1-014,PBX1-006,PBX1-007,PBX1-012,PBX1-002,PBX1-001,PBX1-010	1	164528308	164528362	42.04	0.04	0	0	0
RP11-706O15.5	RNA5SP85	RNA5SP85	RNA5SP85-201	2	11702566	11702630	44.94	0.035	0.017	0.035	0.017	1	rs142037892
RP11-706O15.5	EMX2OS	EMX2OS	EMX2OS-006	10	119308007	119308060	36.43	0.021	0.019	0	0
RP11-706O15.5	CCDC91	CCDC91	CCDC91-015,CCDC91-014	12	28299786	28299850	46.62	0.017	0.016	0.016	0	1	rs11049370
RP11-706O15.5	NDRG2	NDRG2	NDRG2-018,NDRG2-004	14	21490869	21490923	37.91	0	0	0.043	0
RP11-706O15.5	44628	45724	MARCH8-002,MARCH8-001	10	46032274	46032336	42.64	0.121	0.095	0.036	0	2	rs144568617,rs147818958
RP11-706O15.5	PKMYT1,LA16c-380H5.6	PKMYT1,LA16c-380H5.6	PKMYT1-008,PKMYT1-018,PKMYT1-016,PKMYT1-004,PKMYT1-007,PKMYT1-015,PKMYT1-001,PKMYT1-013,PKMYT1-003,PKMYT1-002,LA16c-380H5.6-001,PKMYT1-017,PKMYT1-012,PKMYT1-014	16	3032568	3032640	49.27	0	0	0.082	0	1	.
RP11-706O15.5	UNKL	UNKL	UNKL-006	16	1455213	1455274	42.84	0	0	0	0	1	.
RP11-706O15.5	RNU6-600P	RNU6-600P	RNU6-600P-201	12	49286041	49286104	46.18	0.081	0	0.016	0	1	rs192446063
RP11-706O15.5	FAM168B	FAM168B	FAM168B-003,FAM168B-001	2	131851037	131851122	57.94	0	0	0.012	0
RP11-706O15.5	ASPHD1,SEZ6L2	ASPHD1,SEZ6L2	SEZ6L2-008,ASPHD1-004,ASPHD1-005,SEZ6L2-001,ASPHD1-001,ASPHD1-002,ASPHD1-003,SEZ6L2-003,SEZ6L2-005,SEZ6L2-002,SEZ6L2-201,SEZ6L2-202	16	29912179	29912251	51.55	0	0	0.014	0	1	rs116806822
RP11-706O15.5	AC092675.3	AC092675.3	AC092675.3-001,AC092675.3-002	2	98950759	98950830	50.98	0.031	0.014	0.015	0
RP11-706O15.5	POLG,RP11-217B1.2	POLG,POLG-DT	POLG-003,RP11-217B1.2-001,RP11-217B1.2-002	15	89875125	89875185	42.42	0	0	0.018	0
RP11-706O15.5	NUP85	NUP85	NUP85-024,NUP85-020,NUP85-021	17	73229466	73229525	39.4	0.275	0	0.036	0
RP11-706O15.5	ABCC1	ABCC1	ABCC1-007	16	16100714	16100775	40.8	0.213	0	0.017	0	1	rs141021721
RP11-706O15.5	SNX21	SNX21	SNX21-012,SNX21-201,SNX21-004,SNX21-005,SNX21-011,SNX21-010,SNX21-002,SNX21-003,SNX21-009	20	44460262	44460326	44.73	0.016	0	0	0	1	rs200138085
RP11-706O15.5	RN7SL399P	RN7SL399P	RN7SL399P-201	17	39888228	39888287	42.92	0.121	0	0.017	0	1	rs149703380
RP11-706O15.5	LUC7L3	LUC7L3	LUC7L3-019,LUC7L3-027,LUC7L3-026,LUC7L3-022,LUC7L3-021,LUC7L3-020	17	48823133	48823206	50.4	0	0	0	0
RP11-706O15.5	RPRML	RPRML	RPRML-001	17	45057693	45057774	58.75	0.032	0.072	0.04	0	2	.,.
RP11-706O15.5	RP11-88E10.5,ATP11A	RP11-88E10.5,ATP11A	RP11-88E10.5-001,ATP11A-001,ATP11A-202,ATP11A-201	13	113344186	113344279	58.97	0.011	0	0	0
RP11-706O15.5	MIR208A	MIR208A	MIR208A-201	14	23859100	23859179	53.82	0.043	0	0.013	0
RP11-706O15.5	CLRN1-AS1,CLRN1	CLRN1-AS1,CLRN1	CLRN1-AS1-002,CLRN1-001,CLRN1-004,CLRN1-005,CLRN1-006	3	150691811	150691881	53.82	0	0	0.015	0
RP11-706O15.5	DNAJB12	DNAJB12	DNAJB12-202,DNAJB12-003,DNAJB12-201,DNAJB12-001	10	74116592	74116653	39	0.022	0.119	0	0
RP11-706O15.5	FAM214A	ATOSA	FAM214A-007,FAM214A-013,FAM214A-010,FAM214A-002,FAM214A-003,FAM214A-001,FAM214A-008,FAM214A-009,FAM214A-201	15	52971958	52972016	43.65	0.079	0.037	0.081	0
RP11-706O15.5	TAS1R2	TAS1R2	TAS1R2-001	1	19185050	19185122	53	0	0.015	0.031	0.015	1	rs72953142
RP11-706O15.5	UBE2E2-AS1,UBE2E2	UBE2E2-DT,UBE2E2	UBE2E2-004,UBE2E2-001,UBE2E2-002,UBE2E2-003,UBE2E2-AS1-002,UBE2E2-AS1-001	3	23245157	23245224	47.52	0	0	0.015	0
RP11-706O15.5	RNASEH1	RNASEH1	RNASEH1-004	2	3600107	3600195	57.33	0.064	0	0.025	0	2	.,.
RP11-706O15.5	MPP5	PALS1	MPP5-001,MPP5-003,MPP5-002,MPP5-005,MPP5-004,MPP5-007,MPP5-006	14	67707951	67708005	37.91	0	0	0	0
RP11-706O15.5	MLNR	MLNR	MLNR-001	13	49795074	49795141	45.7	0	0	0	0
RP11-706O15.5	RP11-84C13.2	RP11-84C13.2	RP11-84C13.2-001	4	90040243	90040305	43.88	0.024	0.018	0.017	0
RP11-706O15.5	RP11-708H21.4	RP11-708H21.4	RP11-708H21.4-001	17	47246446	47246531	57.12	0.012	0	0	0
RP11-706O15.5	COL4A2	COL4A2	COL4A2-008	13	111127216	111127285	44.54	0.048	0.016	0.016	0	2	rs199949906,rs181525802
RP11-706O15.5	ABCC10	ABCC10	ABCC10-010,ABCC10-011	6	43415297	43415370	50.4	0	0	0.029	0	1	rs115869996
RP11-706O15.5	RP11-225H22.4,CALHM2	RP11-225H22.4,CALHM2	CALHM2-001,CALHM2-002,CALHM2-003,CALHM2-004,CALHM2-005,CALHM2-006,CALHM2-007,RP11-225H22.4-001	10	105211370	105211422	36.21	0	0.021	0	0
RP11-706O15.5	GPHN	GPHN	GPHN-006,GPHN-003	14	66975141	66975206	42.77	0.016	0	0.017	0	1	rs201725497
RP11-706O15.5	IL12A-AS1	IL12A-AS1	IL12A-AS1-002	3	159735800	159735850	36.35	0.477	0	0.047	0
RP11-706O15.5	ACSL1	ACSL1	ACSL1-004,ACSL1-005,ACSL1-006,ACSL1-001,ACSL1-011	4	185747016	185747091	49.1	0	0	0	0
RP11-706O15.5	RP11-718O11.1	RP11-718O11.1	RP11-718O11.1-001,RP11-718O11.1-002	15	45998153	45998228	51.41	0	0	0.014	0	1	rs11857628
RP11-706O15.5	SENP1	SENP1	SENP1-007,SENP1-006	12	48503094	48503145	37.15	0.069	0.02	0.02	0	1	rs12099462
RP11-706O15.5	HOXA7,RP1-170O19.24,RP1-170O19.23	HOXA7,RP1-170O19.24,RP1-170O19.23	RP1-170O19.24-001,HOXA7-003,HOXA7-001,RP1-170O19.23-001	7	27195404	27195464	41.21	0	0	0	0
RP11-706O15.5	MRPL10	MRPL10	MRPL10-007,MRPL10-006,MRPL10-005,MRPL10-004,MRPL10-002,MRPL10-001	17	45910704	45910775	50.98	0.153	0	0.015	0
RP11-706O15.5	RP11-34P13.7	RP11-34P13.7	RP11-34P13.7-001	1	121017	121090	48.96	0.168	0.015	0	0
RP11-706O15.5	RP11-368N21.5	RP11-368N21.5	RP11-368N21.5-001	16	29607649	29607728	58.61	0.028	0	0.029	0
RP11-706O15.5	FAM69C	DIPK1C	FAM69C-002	18	72128572	72128635	45.55	0.067	0.034	0.034	0
RP11-706O15.5	MIR766	MIR766	MIR766-201	X	118781368	118781432	44.94	0	0	0	0	3	.,.,.
RP11-706O15.5	NOTCH4	NOTCH4	NOTCH4-004	6	32183545	32183621	53.25	0.013	0.115	0.06	0	1	rs201412446
RP11-706O15.5	AHCTF1	AHCTF1	AHCTF1-002	1	247094760	247094829	43.78	0	0.016	0	0
RP11-706O15.5	RP11-63G10.2	RP11-63G10.2	RP11-63G10.2-001	1	59315734	59315791	43.2	0.018	0	0	0
RP11-706O15.5	RHOBTB2	RHOBTB2	RHOBTB2-006,RHOBTB2-003,RHOBTB2-001	8	22854020	22854083	41.34	0.073	0.017	0.038	0	1	rs143675821
RP11-706O15.5	RAPGEF4	RAPGEF4	RAPGEF4-201,RAPGEF4-006	2	173790486	173790569	52.99	0.122	0.012	0	0
RP11-706O15.5	RNU6-339P,RNU6-796P	RNU6-339P,RNU6-796P	RNU6-339P-201,RNU6-796P-201	15	85483757	85483830	52.56	0.029	0	0	0
RP11-706O15.5	TBX3	TBX3	TBX3-002,TBX3-003,TBX3-201	12	115121855	115121916	42	0	0	0.119	0	2	rs78033245,rs80299182
RP11-706O15.5	FOLR1	FOLR1	FOLR1-004	11	71904392	71904456	45.36	0.055	0.016	0.016	0	1	rs117018032
RP11-706O15.5	HSBP1L1	HSBP1L1	HSBP1L1-004	18	77729237	77729314	54.53	0	0.064	0.027	0	1	.
RP11-706O15.5	PRDM8	PRDM8	PRDM8-201,PRDM8-011,PRDM8-004	4	81107526	81107589	42.43	0	0.036	0	0
RP11-706O15.5	MBNL3	MBNL3	MBNL3-004,MBNL3-006,MBNL3-008	X	131622648	131622730	58.32	0	0	0	0	3	.,.,.
RP11-706O15.5	STK38	STK38	STK38-001	6	36517105	36517171	51.28	0	0.05	0.091	0	5	.,.,rs6915917,.,rs183032639
RP11-706O15.5	PLXND1	PLXND1	PLXND1-002,PLXND1-014,PLXND1-017,PLXND1-016	3	129279597	129279684	59.57	0.012	0.012	0.024	0.012	1	rs9860256
RP11-706O15.5	CROCC	CROCC	CROCC-014	1	17290829	17290895	45.95	0	0	0	0
RP11-706O15.5	KIAA0753	KIAA0753	KIAA0753-008	17	6534884	6534935	36.12	0.045	0	0.02	0
RP11-706O15.5	ABCA8	ABCA8	ABCA8-013	17	66884004	66884074	46.23	0.169	0.052	0.033	0
RP11-706O15.5	TUBA1C,RP11-977B10.2	TUBA1C,RP11-977B10.2	TUBA1C-006,RP11-977B10.2-001,TUBA1C-001	12	49658579	49658657	58.05	0.036	0	0.066	0	3	rs4554935,rs4554934,.
RP11-706O15.5	RP11-97N19.2	RP11-97N19.2	RP11-97N19.2-001	20	19195468	19195534	48.62	0.016	0	0.07	0	1	rs114963849
RP11-706O15.5	SCRT2	SCRT2	SCRT2-001	20	656769	656832	41.34	0.017	0.017	0.017	0.017	1	rs61546405
RP11-706O15.5	PTPRE	PTPRE	PTPRE-011	10	129858416	129858480	42.84	0	0	0	0
RP11-706O15.5	Metazoa_SRP.98	Metazoa_SRP.98	Metazoa_SRP.98-201	9	140535472	140535527	39.96	0.019	0	0.07	0
RP11-706O15.5	NCR2	NCR2	NCR2-001	6	41304568	41304626	38.99	0	0.019	0.018	0
RP11-706O15.5	SLITRK2	SLITRK2	SLITRK2-001	X	144899249	144899321	52.84	0	0.048	0.015	0	2	.,.
RP11-706O15.5	TACR2	TACR2	TACR2-002	10	71169597	71169673	48.75	0.031	0.137	0.096	0
RP11-706O15.5	RP11-323P17.2	LINC02930	RP11-323P17.2-001,RP11-323P17.2-002	10	122577619	122577703	59.21	0.195	0.041	0.053	0	1	rs199776642
RP11-706O15.5	AC091153.4	AC091153.4	AC091153.4-001	17	4575575	4575625	37.85	0.044	0	0	0
RP11-706O15.5	JUP	JUP	JUP-011	17	39922523	39922593	48.99	0	0.015	0.03	0.015	4	rs7210929,rs72835665,.,rs200837846
RP11-706O15.5	RNA5SP296	RNA5SP296	RNA5SP296-201	9	130605925	130606015	58.11	0.051	0.011	0	0	2	rs34864592,.
RP11-706O15.5	SLC12A1	SLC12A1	SLC12A1-007	15	48511765	48511844	55.44	0.979	0	0	0
RP11-706O15.5	PDCD7	PDCD7	PDCD7-005	15	65424402	65424465	44.52	0.314	0.096	0	0	1	rs200140999
RP11-706O15.5	CAPN8	CAPN8	CAPN8-003	1	223842724	223842788	43.47	0.019	0	0.016	0
RP11-706O15.5	LAMA3	LAMA3	LAMA3-005,LAMA3-001,LAMA3-003	18	21269549	21269620	46.02	0	0	0	0
RP11-706O15.5	B4GALT3	B4GALT3	B4GALT3-005,B4GALT3-007,B4GALT3-006,B4GALT3-001,B4GALT3-003,B4GALT3-002,B4GALT3-009,B4GALT3-008,B4GALT3-201,B4GALT3-012,B4GALT3-010,B4GALT3-011	1	161149081	161149154	54.9	0.054	0.1	0.045	0	1	rs4656990
RP11-706O15.5	ERICH6-AS1	ERICH6-AS1	ERICH6-AS1-001	3	150422606	150422658	36.72	0	0.083	0.07	0	2	.,.
RP11-706O15.5	DLX4	DLX4	DLX4-005	17	48044727	48044784	41.74	0.077	0	0.018	0	1	rs56866412
RP11-706O15.5	NEIL2	NEIL2	NEIL2-002,NEIL2-003,NEIL2-005,NEIL2-007	8	11624486	11624560	52.4	0.083	0.044	0.014	0	2	.,.
RP11-706O15.5	SLC4A1	SLC4A1	SLC4A1-003	17	42341073	42341153	58.25	0.013	0.013	0.026	0
RP11-706O15.5	GCNT3	GCNT3	GCNT3-005,GCNT3-004,GCNT3-006	15	59892987	59893050	40.56	0.085	0.063	0	0	1	.
RP11-706O15.5	RP11-514O12.4,RNASET2	RP11-514O12.4,RNASET2	RNASET2-007,RNASET2-006,RNASET2-004,RNASET2-003,RNASET2-002,RNASET2-001,RP11-514O12.4-001,RNASET2-012,RNASET2-201,RNASET2-202	6	167372387	167372443	38.5	0	0	0	0
RP11-706O15.5	NEIL1	NEIL1	NEIL1-020	15	75642160	75642221	40.2	0	0	0	0
RP11-706O15.5	SAMD14	SAMD14	SAMD14-004	17	48197661	48197731	49.68	0	0	0	0
RP11-706O15.5	C17orf85	NCBP3	C17orf85-004,C17orf85-003	17	3729976	3730038	44.5	0	0.017	0.017	0
RP11-706O15.5	RPS6KA2	RPS6KA2	RPS6KA2-004	6	166875003	166875082	53.82	0.013	0.12	0.013	0
RP11-706O15.5	RP11-173L6.1	RP11-173L6.1	RP11-173L6.1-001	18	73582933	73583000	46.86	0.33	0.032	0.137	0	1	rs8089813
RP11-706O15.5	LINC00963	LINC00963	LINC00963-015	9	132259287	132259339	36.02	0	0	0	0	1	.
RP11-706O15.5	ZBTB22	ZBTB22	ZBTB22-201,ZBTB22-002,ZBTB22-001	6	33287796	33287850	39.31	0	0	0.045	0	2	rs146304558,rs74986527
RP11-706O15.5	DOK4	DOK4	DOK4-003,DOK4-019,DOK4-016,DOK4-017,DOK4-015,DOK4-012,DOK4-011	16	57513664	57513736	50.69	0	0	0	0
RP11-706O15.5	TP53TG5	TP53TG5	TP53TG5-001	20	44008255	44008327	47.84	0	0	0.029	0	2	rs144402502,rs2741641
RP11-706O15.5	RP11-173D3.4	RP11-173D3.4	RP11-173D3.4-001	15	20343657	20343720	41.98	0.017	0	0	0
RP11-706O15.5	EYA2	EYA2	EYA2-005,EYA2-201,EYA2-008,EYA2-003	20	45520675	45520752	50.69	0.03	0	0.013	0
RP11-706O15.5	RP11-495K9.8	RP11-495K9.8	RP11-495K9.8-001	12	132128030	132128106	53.25	0.387	0	0.013	0	1	rs11833834
RP11-706O15.5	RP11-17M15.1	RP11-17M15.1	RP11-17M15.1-001	16	32198526	32198587	41.62	0.266	0	0	0
RP11-706O15.5	MSI1	MSI1	MSI1-001	12	120810122	120810178	40.18	0	0	0	0
RP11-706O15.5	RP5-1198O20.4	RP5-1198O20.4	RP5-1198O20.4-013,RP5-1198O20.4-012	1	44494446	44494503	40.61	0.041	0.083	0.038	0	1	.
RP11-706O15.5	RNU6-628P	RNU6-628P	RNU6-628P-201	8	124275202	124275271	50.11	0.015	0	0.032	0	1	rs60058056
RP11-706O15.5	KRTAP9-9	KRTAP9-9	KRTAP9-9-001	17	39409169	39409248	56.23	0.208	0.027	0	0
RP11-706O15.5	MIR4641	MIR4641	MIR4641-201	6	41565886	41565950	44.94	0	0	0	0
RP11-706O15.5	RP11-23J9.4	SUGT1P4-STRA6LP-CCDC180	RP11-23J9.4-004	9	100052476	100052563	57.89	0.134	0.012	0.012	0	1	rs118095844
RP11-706O15.5	WRAP53	WRAP53	WRAP53-005,WRAP53-007,WRAP53-006	17	7602776	7602840	41.58	0	0.529	0.278	0
RP11-706O15.5	MAP2K1	MAP2K1	MAP2K1-002	15	66676044	66676105	42.84	0	0	0.018	0	1	rs137919253
RP11-706O15.5	CRTC3	CRTC3	CRTC3-008	15	91155270	91155329	44.1	0.068	0.018	0.143	0
RP11-706O15.5	RP11-134O21.1	LINC03021	RP11-134O21.1-001,RP11-134O21.1-002,RP11-134O21.1-003,RP11-134O21.1-004,RP11-134O21.1-005,RP11-134O21.1-006	8	2587872	2587950	56.59	0.044	0	0	0
RP11-706O15.5	SLC15A4	SLC15A4	SLC15A4-001,SLC15A4-002,SLC15A4-007	12	129310958	129311018	40.6	0.086	0	0.04	0	1	.
RP11-706O15.5	CAB39L	CAB39L	CAB39L-007	13	50018221	50018283	39.55	0.036	0	0.017	0	1	rs192200760
RP11-706O15.5	DNASE1L1,TAZ	DNASE1L1,TAFAZZIN	TAZ-008,DNASE1L1-201,DNASE1L1-003,DNASE1L1-202,DNASE1L1-009	X	153643799	153643880	57.12	0.078	0.013	0.027	0	2	rs28401328,.
RP11-706O15.5	RALGDS	RALGDS	RALGDS-011	9	135974957	135975042	55.44	0	0.038	0.068	0
RP11-706O15.5	ZNF462	ZNF462	ZNF462-011,ZNF462-002,ZNF462-009	9	109687834	109687895	41.4	0	0	0.125	0.062	4	rs146183570,rs199560820,rs145644535,rs201788834
RP11-706O15.5	UPK1A-AS1	UPK1A-AS1	UPK1A-AS1-001	19	36166973	36167058	57.12	0.026	0	0.026	0	1	rs73600901
RP11-706O15.5	USF1	USF1	USF1-001,USF1-010,USF1-004,USF1-006,USF1-007,USF1-008	1	161018576	161018659	55.48	0	0	0.012	0
RP11-706O15.5	44625	45721	MARCH5-003	10	94091651	94091726	49.85	0.047	0.048	0.046	0	1	.
RP11-706O15.5	FAM21C	WASHC2C	FAM21C-003	10	46279695	46279761	41.86	0	0.091	0.091	0	1	.
RP11-706O15.5	LINC01502	LINC01502	LINC01502-003	9	138476035	138476107	46.41	0	0	0	0
RP11-706O15.5	GRB14	GRB14	GRB14-004,GRB14-005,GRB14-002,GRB14-001	2	165478220	165478307	55.19	0	0	0	0
RP11-706O15.5	ZFP41	ZFP41	ZFP41-002	8	144325513	144325583	49.68	0.554	0.032	0.032	0	1	.
RP11-706O15.5	NXT2	NXT2	NXT2-002,NXT2-004	X	108778171	108778249	56.59	0	0	0.028	0	4	rs6568262,.,rs186909459,.
RP11-706O15.5	LINC01158,POU3F3	PANTR1,POU3F3	LINC01158-003,POU3F3-001	2	105472744	105472812	44.07	0.031	0	0	0
RP11-706O15.5	ZNF689	ZNF689	ZNF689-005,ZNF689-201,ZNF689-001,ZNF689-003	16	30622142	30622196	36.31	0.054	0	0	0
RP11-706O15.5	MYOM2	MYOM2	MYOM2-015,MYOM2-005	8	2074267	2074336	43.78	0.036	0	0.034	0	4	rs200502142,.,.,.
RP11-706O15.5	RP11-170M17.1	RP11-170M17.1	RP11-170M17.1-001	10	65422825	65422883	39.9	0.019	0.019	0.019	0.019
RP11-706O15.5	TPM1	TPM1	TPM1-026	15	63353820	63353874	38.22	0	0	0.019	0	1	rs77362326
RP11-706O15.5	SPINK14	SPINK14	SPINK14-001,SPINK14-002	5	147549632	147549708	50.25	0.062	0	0.029	0	2	rs7727191,.
RP11-706O15.5	RP11-879F14.1	RP11-879F14.1	RP11-879F14.1-002,RP11-879F14.1-005	18	59418421	59418496	50.65	0.014	0	0	0
RP11-706O15.5	CARD14	CARD14	CARD14-009,CARD14-003,CARD14-001,CARD14-014,CARD14-011,CARD14-010	17	78145027	78145108	58.69	0.013	0	0.014	0	1	rs138332188
RP11-706O15.5	POLE	POLE	POLE-012,POLE-013	12	133251427	133251493	46.43	0	0	0	0	1	rs151290785
RP11-706O15.5	VPS16,PTPRA	VPS16,PTPRA	VPS16-002,VPS16-006,VPS16-007,PTPRA-003	20	2844428	2844492	44.1	0.076	0.072	0.072	0	1	rs117259301
RP11-706O15.5	CDH5	CDH5	CDH5-007	16	66413629	66413713	59.21	0	0	0.012	0
RP11-706O15.5	SAP130	SAP130	SAP130-003	2	128787881	128787949	46.78	0	0	0	0
RP11-706O15.5	RP11-569G13.2	RP11-569G13.2	RP11-569G13.2-001	9	98857800	98857858	43.07	0	0	0.019	0
RP11-706O15.5	ACSM1,ACSM3	ACSM1,ACSM3	ACSM1-006,ACSM3-015,ACSM3-014,ACSM3-013	16	20684164	20684222	40.47	0.075	0	0.019	0	1	.
RP11-706O15.5	LMNTD1	LMNTD1	LMNTD1-006	12	25800864	25800920	40.73	0.019	0	0	0
RP11-706O15.5	PPM1L	PPM1L	PPM1L-004,PPM1L-005	3	160558528	160558603	51.41	0.212	0	0.029	0
RP11-706O15.5	RP11-212I21.3	RP11-212I21.3	RP11-212I21.3-001	16	55518916	55518970	37.38	0.067	0	0	0
RP11-706O15.5	RP11-399E6.1	SCMH1-DT	RP11-399E6.1-003	1	41726593	41726670	52.22	0.029	0.061	0.124	0	7	.,.,rs188258036,.,rs183583000,.,rs12116589
RP11-706O15.5	LETMD1	LETMD1	LETMD1-011,LETMD1-010,LETMD1-008,LETMD1-009,LETMD1-023,LETMD1-033,LETMD1-021,LETMD1-001,LETMD1-003,LETMD1-016	12	51439256	51439312	39.06	0	0	0	0
RP11-706O15.5	RP11-53B5.1	RP11-53B5.1	RP11-53B5.1-001	9	96620241	96620315	50.18	0	0	0	0
RP11-706O15.5	SEC16B	SEC16B	SEC16B-005	1	177920014	177920079	49.25	0	0	0	0
RP11-706O15.5	ARPP21	ARPP21	ARPP21-009,ARPP21-008,ARPP21-027,ARPP21-006,ARPP21-005,ARPP21-004,ARPP21-016,ARPP21-010,ARPP21-024,ARPP21-012,ARPP21-028,ARPP21-018,ARPP21-019	3	35722216	35722286	52.65	0.168	0	0	0
RP11-706O15.5	FBN1	FBN1	FBN1-008	15	48726446	48726512	46.62	0	0	0	0
RP11-706O15.5	CTD-2532D12.4	CTD-2532D12.4	CTD-2532D12.4-001	17	71730523	71730587	45.99	0.033	0	0.016	0	1	rs191631580
RP11-706O15.5	SYBU	SYBU	SYBU-204,SYBU-202,SYBU-019,SYBU-018	8	110664538	110664606	50.85	0	0	0.092	0	2	rs73321029,rs34132792
RP11-706O15.5	GPR116	ADGRF5	GPR116-001	6	46924694	46924770	52.5	0.068	0	0	0
RP11-706O15.5	TBX21	TBX21	TBX21-002,TBX21-001	17	45811929	45811987	37.05	0.143	0.037	0.081	0
RP11-706O15.5	ADAMTS8	ADAMTS8	ADAMTS8-001	11	130301172	130301230	37.62	0.075	0	0.037	0	1	.
RP11-706O15.5	CTC-400I9.3	CTC-400I9.3	CTC-400I9.3-001	19	31435555	31435626	51.68	0	0	0.111	0	1	rs182602838
RP11-706O15.5	Y_RNA.532	Y_RNA.532	Y_RNA.532-201	5	139397392	139397446	38.22	0	0	0.04	0
RP11-706O15.5	MAGEC1	MAGEC1	MAGEC1-201,MAGEC1-001	X	140993109	140993161	36.21	0.02	0	0.02	0	2	.,rs5953637
RP11-706O15.5	RP11-522B15.3	RP11-522B15.3	RP11-522B15.3-001,RP11-522B15.3-002	15	96898567	96898634	45.54	0	0	0.05	0
RP11-706O15.5	RP11-283G6.5	RP11-283G6.5	RP11-283G6.5-001,RP11-283G6.5-002	12	26424494	26424558	46.22	0	0	0	0
RP11-706O15.5	POLR1D,LNX2	POLR1D,LNX2	POLR1D-003,POLR1D-001,LNX2-001,POLR1D-005,POLR1D-004,POLR1D-201,POLR1D-202	13	28194420	28194478	37.83	0.042	0	0	0
RP11-706O15.5	LRP5	LRP5	LRP5-002	11	68077561	68077635	50.18	0	0	0	0
RP11-706O15.5	CTD-2529O21.2	CTD-2529O21.2	CTD-2529O21.2-002,CTD-2529O21.2-001	17	77998198	77998280	54.27	0.105	0	0.118	0
RP11-706O15.5	RNA5SP144	RNA5SP144	RNA5SP144-201	3	143908299	143908357	37.83	0.023	0	0	0
RP11-706O15.5	AP001189.4	LRRC32-AS1	AP001189.4-001	11	76365789	76365858	47.33	0.016	0	0.015	0	1	rs141817994
RP11-706O15.5	CTD-2541M15.1	MCPH1-AS1	CTD-2541M15.1-001	8	6508324	6508396	51.41	0.014	0	0	0
RP11-706O15.5	AC005158.1	AC005158.1	AC005158.1-201	7	42261056	42261147	58.37	0.039	0	0.012	0.012
RP11-706O15.5	AC243562.2	AC243562.2	AC243562.2-201	15	82968500	82968559	42.34	0	0	0	0
RP11-706O15.5	CHRNA4	CHRNA4	CHRNA4-001	20	61992764	61992819	37.54	0.066	0.098	0.105	0.098	1	rs58134915
RP11-706O15.5	HTN3	HTN3	HTN3-010,HTN3-006,HTN3-007,HTN3-001,HTN3-008,HTN3-009	4	70891143	70891222	57.02	0.014	0	0.013	0
RP11-706O15.5	BEAN1	BEAN1	BEAN1-007,BEAN1-008	16	66504144	66504208	46.22	0	0	0.016	0
RP11-706O15.5	AKR7A2,PQLC2	AKR7A2,SLC66A1	PQLC2-005,PQLC2-006,AKR7A2-001,AKR7A2-003,AKR7A2-002,PQLC2-002,PQLC2-004,AKR7A2-007,PQLC2-001	1	19639774	19639850	54.86	0	0	0.029	0	1	rs11387394
RP11-706O15.5	EMD	EMD	EMD-004,EMD-009	X	153609333	153609387	37.91	0	0	0	0	3	.,.,.
RP11-706O15.5	MIR506	MIR506	MIR506-201	X	146314670	146314749	57.72	0	0	0	0	1	.
[truncated: 152,315 more rows]

## Sheet: Table D
Protein coding gene with strongest DBS	Binding affinity	Protein coding genes with weakest DBS	Binding affinity	GO terms (Protein coding gene with strongest DBS)	term_id	adj_p	GO terms (Protein coding gene with weakest DBS)	term_id	adj_p
[truncated: 2,000 more rows]

[truncated: 14 more sheets: Table E, Table F, Table G, Table H, Table I, Table J, Table K, Table L, Table M, Table N, Table O, Table P, Table Q, Table R]
